# Supplementary material for: Virus infection of the CNS disrupts the immune-neural-synaptic axis via induction of pleiotropic gene regulation of host responses
Source: eLife. 2021 Feb 18;10:e62273. doi: 10.7554/eLife.62273 (PMC7891934; doi:10.7554/eLife.62273)
Supplement: Supplementary file 1. [file elife-62273-supp1.xlsx]

## Sheet: Cerebellum_9dpi_CC-GOs_FDR<0.05
GO cellular component complete	Number of genes	Shift to greater values(+)/Shift to smaller values(-)	pvalue	FDR
external side of plasma membrane (GO:0009897)	93	+	1.25e-08	4.55e-06
side of membrane (GO:0098552)	121	+	3.72e-07	5.09e-05
intracellular vesicle (GO:0097708)	345	+	3.3e-07	5.16e-05
cytoplasmic vesicle (GO:0031410)	345	+	3.3e-07	6.02e-05
cell surface (GO:0009986)	195	+	1.8e-06	0.000218
secretory granule (GO:0030141)	159	+	5.71e-06	0.000568
vesicle (GO:0031982)	497	+	9.01e-06	0.000758
tertiary granule (GO:0070820)	44	+	2.98e-05	0.00192
extracellular region (GO:0005576)	524	+	4.26e-05	0.00245
extracellular space (GO:0005615)	412	+	6.11e-05	0.00318
secretory vesicle (GO:0099503)	173	+	7.95e-05	0.00395
vesicle membrane (GO:0012506)	133	+	9.69e-05	0.00442
cytoplasmic vesicle membrane (GO:0030659)	131	+	0.00018	0.00616
secretory granule membrane (GO:0030667)	72	+	0.000274	0.00834
lysosome (GO:0005764)	103	+	0.00061	0.0152
lytic vacuole (GO:0000323)	103	+	0.00061	0.0155
clathrin-coated endocytic vesicle (GO:0045334)	13	+	0.000733	0.0178
specific granule membrane (GO:0035579)	26	+	0.000747	0.0178
blood microparticle (GO:0072562)	21	+	0.000852	0.0194
specific granule (GO:0042581)	43	+	0.000882	0.0197
tertiary granule membrane (GO:0070821)	23	+	0.000907	0.0198
whole membrane (GO:0098805)	258	+	0.00102	0.0219
vacuole (GO:0005773)	113	+	0.00123	0.0249
extracellular organelle (GO:0043230)	267	+	0.0018	0.0333
extracellular matrix (GO:0031012)	92	+	0.00178	0.0341
endocytic vesicle (GO:0030139)	53	+	0.00196	0.0357
endocytic vesicle membrane (GO:0030666)	38	+	0.00201	0.036
extracellular exosome (GO:0070062)	266	+	0.00243	0.0396
extracellular vesicle (GO:1903561)	266	+	0.00243	0.0402
MHC class I peptide loading complex (GO:0042824)	5	+	0.00233	0.0404
clathrin-coated endocytic vesicle membrane (GO:0030669)	12	+	0.00236	0.0404
cytoplasmic vesicle lumen (GO:0060205)	66	+	0.00266	0.0409
vesicle lumen (GO:0031983)	66	+	0.00266	0.0415
secretory granule lumen (GO:0034774)	65	+	0.00317	0.0475
plasma membrane bounded cell projection (GO:0120025)	228	-	7.5e-09	4.1e-06
neuron projection (GO:0043005)	139	-	6.06e-09	6.62e-06
cell projection (GO:0042995)	241	-	4.21e-08	1.15e-05
synapse (GO:0045202)	146	-	5.44e-08	1.19e-05
glutamatergic synapse (GO:0098978)	44	-	3.01e-06	0.000329
dendritic tree (GO:0097447)	68	-	8.14e-06	0.000742
dendrite (GO:0030425)	67	-	1.73e-05	0.00135
axon (GO:0030424)	65	-	2.27e-05	0.00166
somatodendritic compartment (GO:0036477)	91	-	2.88e-05	0.00197
postsynapse (GO:0098794)	68	-	3.92e-05	0.00239
synaptic membrane (GO:0097060)	47	-	5.45e-05	0.00298
neuron to neuron synapse (GO:0098984)	36	-	8.01e-05	0.00381
transporter complex (GO:1990351)	30	-	0.00011	0.0043
cilium (GO:0005929)	45	-	0.000101	0.00444
transmembrane transporter complex (GO:1902495)	30	-	0.00011	0.00446
ion channel complex (GO:0034702)	30	-	0.00011	0.00463
neuronal cell body (GO:0043025)	65	-	0.000129	0.00487
cation channel complex (GO:0034703)	21	-	0.000142	0.00519
postsynaptic specialization membrane (GO:0099634)	14	-	0.000163	0.00574
asymmetric synapse (GO:0032279)	34	-	0.00021	0.00676
postsynaptic density (GO:0014069)	34	-	0.00021	0.00696
postsynaptic specialization (GO:0099572)	36	-	0.000266	0.0083
ciliary plasm (GO:0097014)	7	-	0.000315	0.00907
axoneme (GO:0005930)	7	-	0.000315	0.00932
presynapse (GO:0098793)	44	-	0.000358	0.0101
cell body (GO:0044297)	76	-	0.000405	0.0111
postsynaptic membrane (GO:0045211)	33	-	0.000434	0.0116
intrinsic component of synaptic membrane (GO:0099240)	19	-	0.0006	0.0156
plasma membrane bounded cell projection cytoplasm (GO:0032838)	13	-	0.000798	0.0186
GABA-ergic synapse (GO:0098982)	10	-	0.00102	0.0215
postsynaptic density membrane (GO:0098839)	12	-	0.0012	0.0247
distal axon (GO:0150034)	25	-	0.0018	0.0339
cytoplasmic region (GO:0099568)	17	-	0.00174	0.034
Unclassified (UNCLASSIFIED)	51	-	0.00172	0.0341
microtubule (GO:0005874)	34	-	0.0021	0.037
myofibril (GO:0030016)	22	-	0.00249	0.0401
sarcomere (GO:0030017)	21	-	0.0024	0.0404
integral component of synaptic membrane (GO:0099699)	16	-	0.00258	0.0409
sarcoplasmic reticulum membrane (GO:0033017)	5	-	0.00312	0.0473

## Sheet: Cerebellum_9dpi_BP-GOs_FDR<0.05
GO biological process complete	Number of genes	Shift to greater values(+)/Shift to smaller values(-)	pvalue	FDR
immune response (GO:0006955)	423	+	0	0
inflammatory response (GO:0006954)	160	+	0	0
defense response (GO:0006952)	340	+	0	0
response to cytokine (GO:0034097)	280	+	0	0
cytokine-mediated signaling pathway (GO:0019221)	208	+	0	0
immune system process (GO:0002376)	570	+	0	0
immune effector process (GO:0002252)	252	+	0	0
cellular response to cytokine stimulus (GO:0071345)	255	+	0	0
innate immune response (GO:0045087)	198	+	0	0
response to other organism (GO:0051707)	312	+	0	0
multi-organism process (GO:0051704)	440	+	0	0
defense response to virus (GO:0051607)	76	+	0	0
regulation of multi-organism process (GO:0043900)	193	+	0	0
regulation of response to external stimulus (GO:0032101)	252	+	0	0
positive regulation of immune response (GO:0050778)	192	+	0	0
regulation of immune response (GO:0050776)	267	+	0	0
response to bacterium (GO:0009617)	150	+	0	0
response to virus (GO:0009615)	93	+	0	0
response to biotic stimulus (GO:0009607)	314	+	0	0
response to external stimulus (GO:0009605)	466	+	0	0
defense response to other organism (GO:0098542)	238	+	0	0
regulation of defense response (GO:0031347)	193	+	0	0
response to external biotic stimulus (GO:0043207)	312	+	0	0
positive regulation of immune system process (GO:0002684)	269	+	0	0
regulation of immune system process (GO:0002682)	374	+	0	0
response to stress (GO:0006950)	579	+	1.11e-16	4e-14
regulation of cytokine production (GO:0001817)	195	+	3.33e-16	1.16e-13
leukocyte activation (GO:0045321)	235	+	3.33e-16	1.11e-13
humoral immune response (GO:0006959)	51	+	5.55e-16	1.79e-13
regulation of immune effector process (GO:0002697)	104	+	1.89e-15	5.89e-13
negative regulation of multi-organism process (GO:0043901)	69	+	2.44e-15	7.38e-13
adaptive immune response (GO:0002250)	108	+	4.21e-14	1.23e-11
positive regulation of response to external stimulus (GO:0032103)	163	+	7.27e-14	2.06e-11
leukocyte mediated immunity (GO:0002443)	150	+	7.54e-14	2.08e-11
regulation of response to stress (GO:0080134)	280	+	3.17e-13	8.48e-11
regulation of leukocyte activation (GO:0002694)	150	+	3.2e-13	8.32e-11
regulation of response to biotic stimulus (GO:0002831)	140	+	3.29e-13	8.33e-11
response to molecule of bacterial origin (GO:0002237)	97	+	6.03e-13	1.49e-10
cell activation (GO:0001775)	265	+	6.57e-13	1.58e-10
positive regulation of response to stimulus (GO:0048584)	425	+	6.75e-13	1.58e-10
response to lipopolysaccharide (GO:0032496)	93	+	7.26e-13	1.66e-10
positive regulation of cytokine production (GO:0001819)	130	+	9.11e-13	2.03e-10
myeloid leukocyte activation (GO:0002274)	148	+	1.49e-12	3.25e-10
response to interferon-gamma (GO:0034341)	68	+	1.6e-12	3.4e-10
cellular response to molecule of bacterial origin (GO:0071219)	68	+	1.61e-12	3.34e-10
cellular response to biotic stimulus (GO:0071216)	73	+	1.8e-12	3.66e-10
regulation of innate immune response (GO:0045088)	124	+	1.97e-12	3.93e-10
regulation of leukocyte cell-cell adhesion (GO:1903037)	94	+	2.33e-12	4.54e-10
negative regulation of viral process (GO:0048525)	40	+	2.88e-12	5.51e-10
positive regulation of leukocyte activation (GO:0002696)	104	+	2.94e-12	5.5e-10
cellular response to lipopolysaccharide (GO:0071222)	65	+	3.02e-12	5.54e-10
regulation of cell activation (GO:0050865)	158	+	3.27e-12	5.89e-10
positive regulation of defense response (GO:0031349)	128	+	3.75e-12	6.62e-10
regulation of viral process (GO:0050792)	56	+	4.05e-12	7.02e-10
negative regulation of immune system process (GO:0002683)	126	+	4.33e-12	7.37e-10
positive regulation of cell activation (GO:0050867)	107	+	4.44e-12	7.42e-10
cellular response to interferon-gamma (GO:0071346)	56	+	6.76e-12	1.11e-09
activation of immune response (GO:0002253)	131	+	6.91e-12	1.12e-09
regulation of viral life cycle (GO:1903900)	46	+	7.46e-12	1.18e-09
positive regulation of leukocyte cell-cell adhesion (GO:1903039)	75	+	9.98e-12	1.56e-09
cellular response to organic substance (GO:0071310)	422	+	1.03e-11	1.58e-09
regulation of symbiosis, encompassing mutualism through parasitism (GO:0043903)	59	+	1.66e-11	2.51e-09
type I interferon signaling pathway (GO:0060337)	35	+	2.3e-11	3.41e-09
cellular response to type I interferon (GO:0071357)	35	+	2.3e-11	3.36e-09
response to type I interferon (GO:0034340)	37	+	4.56e-11	6.56e-09
cellular response to chemical stimulus (GO:0070887)	480	+	5.02e-11	7.12e-09
regulation of lymphocyte activation (GO:0051249)	129	+	5.07e-11	7.09e-09
leukocyte activation involved in immune response (GO:0002366)	152	+	6.34e-11	8.72e-09
cell activation involved in immune response (GO:0002263)	152	+	6.34e-11	8.6e-09
regulation of T cell activation (GO:0050863)	95	+	1.5e-10	2.01e-08
cell surface receptor signaling pathway (GO:0007166)	455	+	1.71e-10	2.26e-08
regulation of viral genome replication (GO:0045069)	35	+	2.34e-10	3.04e-08
granulocyte activation (GO:0036230)	118	+	2.5e-10	3.21e-08
negative regulation of viral life cycle (GO:1903901)	35	+	3.57e-10	4.52e-08
response to organic substance (GO:0010033)	502	+	3.76e-10	4.69e-08
positive regulation of lymphocyte activation (GO:0051251)	90	+	3.84e-10	4.73e-08
positive regulation of cell-cell adhesion (GO:0022409)	82	+	4.96e-10	6.03e-08
positive regulation of T cell activation (GO:0050870)	66	+	5.57e-10	6.68e-08
immune response-regulating signaling pathway (GO:0002764)	129	+	5.77e-10	6.84e-08
regulation of response to cytokine stimulus (GO:0060759)	55	+	6.63e-10	7.76e-08
myeloid cell activation involved in immune response (GO:0002275)	122	+	7.08e-10	8.19e-08
neutrophil activation (GO:0042119)	116	+	7.12e-10	8.13e-08
defense response to bacterium (GO:0042742)	51	+	7.51e-10	8.47e-08
negative regulation of immune response (GO:0050777)	43	+	7.6e-10	8.47e-08
myeloid leukocyte mediated immunity (GO:0002444)	119	+	1.03e-09	1.13e-07
positive regulation of immune effector process (GO:0002699)	62	+	1.21e-09	1.32e-07
leukocyte degranulation (GO:0043299)	116	+	1.68e-09	1.81e-07
antimicrobial humoral response (GO:0019730)	25	+	1.7e-09	1.81e-07
immune response-activating signal transduction (GO:0002757)	118	+	1.73e-09	1.82e-07
regulation of inflammatory response (GO:0050727)	90	+	2.07e-09	2.16e-07
interferon-gamma-mediated signaling pathway (GO:0060333)	33	+	2.11e-09	2.17e-07
interspecies interaction between organisms (GO:0044419)	121	+	2.43e-09	2.47e-07
regulation of response to stimulus (GO:0048583)	641	+	2.52e-09	2.54e-07
neutrophil mediated immunity (GO:0002446)	112	+	3.7e-09	3.68e-07
neutrophil activation involved in immune response (GO:0002283)	111	+	4.84e-09	4.77e-07
positive regulation of innate immune response (GO:0045089)	95	+	6.08e-09	5.93e-07
regulation of cell-cell adhesion (GO:0022407)	113	+	6.27e-09	6.06e-07
negative regulation of viral genome replication (GO:0045071)	29	+	7.27e-09	6.95e-07
neutrophil degranulation (GO:0043312)	109	+	7.32e-09	6.93e-07
lymphocyte activation (GO:0046649)	110	+	8.27e-09	7.74e-07
regulation of cell adhesion (GO:0030155)	164	+	1.05e-08	9.77e-07
regulation of leukocyte chemotaxis (GO:0002688)	36	+	1.07e-08	9.81e-07
negative regulation of cytokine production (GO:0001818)	81	+	1.19e-08	1.08e-06
regulation of cytokine-mediated signaling pathway (GO:0001959)	51	+	1.24e-08	1.11e-06
regulation of hemopoiesis (GO:1903706)	111	+	1.74e-08	1.55e-06
positive regulation of response to biotic stimulus (GO:0002833)	101	+	2.44e-08	2.15e-06
secretion by cell (GO:0032940)	201	+	3.11e-08	2.72e-06
regulation of leukocyte differentiation (GO:1902105)	78	+	3.17e-08	2.75e-06
leukocyte migration (GO:0050900)	96	+	3.91e-08	3.36e-06
regulation of adaptive immune response (GO:0002819)	49	+	3.99e-08	3.39e-06
neutrophil chemotaxis (GO:0030593)	28	+	4.01e-08	3.38e-06
regulation of defense response to virus (GO:0050688)	23	+	4.57e-08	3.82e-06
positive regulation of multi-organism process (GO:0043902)	122	+	4.92e-08	4.08e-06
neutrophil migration (GO:1990266)	31	+	5.23e-08	4.29e-06
leukocyte chemotaxis (GO:0030595)	49	+	7.97e-08	6.49e-06
regulated exocytosis (GO:0045055)	151	+	8.82e-08	7.12e-06
response to stimulus (GO:0050896)	1062	+	9.16e-08	7.33e-06
positive regulation of phagocytosis (GO:0050766)	25	+	1.11e-07	8.84e-06
regulation of leukocyte mediated immunity (GO:0002703)	59	+	1.15e-07	9.01e-06
positive regulation of tumor necrosis factor superfamily cytokine production (GO:1903557)	35	+	1.21e-07	9.43e-06
export from cell (GO:0140352)	204	+	1.27e-07	9.86e-06
cell killing (GO:0001906)	26	+	1.51e-07	1.16e-05
lymphocyte mediated immunity (GO:0002449)	41	+	1.59e-07	1.21e-05
granulocyte chemotaxis (GO:0071621)	30	+	1.62e-07	1.22e-05
secretion (GO:0046903)	213	+	1.83e-07	1.36e-05
granulocyte migration (GO:0097530)	33	+	1.86e-07	1.37e-05
negative regulation of multicellular organismal process (GO:0051241)	212	+	1.99e-07	1.45e-05
response to chemical (GO:0042221)	604	+	2.1e-07	1.52e-05
regulation of tumor necrosis factor superfamily cytokine production (GO:1903555)	53	+	2.38e-07	1.71e-05
regulation of phagocytosis (GO:0050764)	30	+	2.45e-07	1.75e-05
positive regulation of leukocyte chemotaxis (GO:0002690)	31	+	2.56e-07	1.81e-05
exocytosis (GO:0006887)	162	+	2.56e-07	1.8e-05
regulation of mononuclear cell proliferation (GO:0032944)	74	+	2.56e-07	1.79e-05
positive regulation of cell adhesion (GO:0045785)	107	+	2.57e-07	1.78e-05
positive regulation of tumor necrosis factor production (GO:0032760)	34	+	2.62e-07	1.8e-05
regulation of leukocyte proliferation (GO:0070663)	78	+	2.65e-07	1.81e-05
regulation of endopeptidase activity (GO:0052548)	77	+	2.65e-07	1.8e-05
regulation of peptidase activity (GO:0052547)	83	+	2.93e-07	1.96e-05
regulation of cytokine secretion (GO:0050707)	63	+	3.07e-07	2.04e-05
T cell activation (GO:0042110)	70	+	3.96e-07	2.61e-05
immune system development (GO:0002520)	132	+	3.98e-07	2.6e-05
myeloid leukocyte migration (GO:0097529)	41	+	4.19e-07	2.72e-05
apoptotic process (GO:0006915)	175	+	4.24e-07	2.74e-05
programmed cell death (GO:0012501)	181	+	4.27e-07	2.74e-05
regulation of lymphocyte proliferation (GO:0050670)	73	+	4.47e-07	2.85e-05
cell death (GO:0008219)	188	+	4.5e-07	2.85e-05
regulation of production of molecular mediator of immune response (GO:0002700)	43	+	7.06e-07	4.44e-05
leukocyte differentiation (GO:0002521)	90	+	7.5e-07	4.68e-05
adaptive immune response based on somatic recombination of immune receptors built from immunoglobulin superfamily domains (GO:0002460)	48	+	8.57e-07	5.32e-05
negative regulation of immune effector process (GO:0002698)	32	+	9.14e-07	5.63e-05
signal transduction (GO:0007165)	718	+	9.49e-07	5.8e-05
immune response-regulating cell surface receptor signaling pathway (GO:0002768)	90	+	9.67e-07	5.88e-05
hemopoiesis (GO:0030097)	119	+	1e-06	6.05e-05
antimicrobial humoral immune response mediated by antimicrobial peptide (GO:0061844)	16	+	1.04e-06	6.26e-05
immune response-activating cell surface receptor signaling pathway (GO:0002429)	81	+	1.05e-06	6.24e-05
negative regulation of response to external stimulus (GO:0032102)	80	+	1.07e-06	6.33e-05
vesicle-mediated transport (GO:0016192)	272	+	1.16e-06	6.82e-05
regulation of tumor necrosis factor production (GO:0032680)	51	+	1.21e-06	7.09e-05
symbiotic process (GO:0044403)	107	+	1.24e-06	7.2e-05
regulation of type I interferon production (GO:0032479)	44	+	1.29e-06	7.44e-05
regulation of cell death (GO:0010941)	281	+	1.34e-06	7.71e-05
cellular response to lipid (GO:0071396)	102	+	1.54e-06	8.72e-05
regulation of lymphocyte differentiation (GO:0045619)	53	+	1.64e-06	9.25e-05
regulation of leukocyte migration (GO:0002685)	59	+	1.67e-06	9.35e-05
signaling (GO:0023052)	744	+	1.82e-06	0.000101
hematopoietic or lymphoid organ development (GO:0048534)	124	+	1.91e-06	0.000106
cytokine production (GO:0001816)	48	+	2.05e-06	0.000113
cell chemotaxis (GO:0060326)	64	+	2.22e-06	0.000122
positive regulation of biological process (GO:0048518)	824	+	2.24e-06	0.000122
regulation of adaptive immune response based on somatic recombination of immune receptors built from immunoglobulin superfamily domains (GO:0002822)	42	+	2.57e-06	0.000139
regulation of T cell differentiation (GO:0045580)	48	+	2.6e-06	0.00014
negative regulation of leukocyte activation (GO:0002695)	58	+	2.72e-06	0.000146
positive regulation of signal transduction (GO:0009967)	301	+	2.74e-06	0.000146
negative regulation of response to biotic stimulus (GO:0002832)	25	+	2.77e-06	0.000146
positive regulation of inflammatory response (GO:0050729)	44	+	2.77e-06	0.000146
regulation of cytokine production involved in immune response (GO:0002718)	30	+	3.15e-06	0.000164
negative regulation of defense response (GO:0031348)	51	+	3.72e-06	0.000192
positive regulation of mononuclear cell proliferation (GO:0032946)	47	+	4.33e-06	0.000223
positive regulation of leukocyte proliferation (GO:0070665)	49	+	4.76e-06	0.000244
response to lipid (GO:0033993)	167	+	5e-06	0.000254
regulation of chemotaxis (GO:0050920)	53	+	5.01e-06	0.000253
disruption of cells of other organism (GO:0044364)	16	+	5.19e-06	0.000261
killing of cells of other organism (GO:0031640)	16	+	5.19e-06	0.00026
negative regulation of innate immune response (GO:0045824)	20	+	5.36e-06	0.000267
positive regulation of response to cytokine stimulus (GO:0060760)	25	+	6.19e-06	0.000307
positive regulation of T cell differentiation (GO:0045582)	30	+	6.34e-06	0.000312
positive regulation of leukocyte migration (GO:0002687)	43	+	6.36e-06	0.000312
cellular response to tumor necrosis factor (GO:0071356)	62	+	7.52e-06	0.000367
positive regulation of lymphocyte proliferation (GO:0050671)	46	+	7.98e-06	0.000387
positive regulation of cell communication (GO:0010647)	316	+	8.18e-06	0.000395
cell communication (GO:0007154)	754	+	8.42e-06	0.000404
response to tumor necrosis factor (GO:0034612)	68	+	8.51e-06	0.000405
positive regulation of signaling (GO:0023056)	318	+	8.84e-06	0.000418
positive regulation of cell death (GO:0010942)	140	+	8.99e-06	0.000423
negative regulation of cell activation (GO:0050866)	62	+	9.42e-06	0.000441
positive regulation of cellular process (GO:0048522)	731	+	9.82e-06	0.000457
positive regulation of transport (GO:0051050)	165	+	1.05e-05	0.000485
positive regulation of production of molecular mediator of immune response (GO:0002702)	30	+	1.07e-05	0.000493
regulation of cytokine biosynthetic process (GO:0042035)	42	+	1.14e-05	0.000523
negative regulation of catalytic activity (GO:0043086)	116	+	1.14e-05	0.000522
positive regulation of lymphocyte differentiation (GO:0045621)	35	+	1.17e-05	0.000533
positive regulation of chemotaxis (GO:0050921)	42	+	1.23e-05	0.000555
cellular response to stimulus (GO:0051716)	866	+	1.23e-05	0.000553
positive regulation of cytokine production involved in immune response (GO:0002720)	19	+	1.34e-05	0.000599
regulation of T cell proliferation (GO:0042129)	53	+	1.34e-05	0.000598
negative regulation of endopeptidase activity (GO:0010951)	39	+	1.42e-05	0.000631
defense response to Gram-positive bacterium (GO:0050830)	22	+	1.45e-05	0.000641
lymphocyte differentiation (GO:0030098)	65	+	1.49e-05	0.000654
activation of innate immune response (GO:0002218)	69	+	1.52e-05	0.000666
regulation of catalytic activity (GO:0050790)	344	+	1.53e-05	0.000665
regulation of protein metabolic process (GO:0051246)	381	+	1.62e-05	0.000701
positive regulation of cytokine secretion (GO:0050715)	45	+	1.68e-05	0.000725
regulation of humoral immune response (GO:0002920)	18	+	1.82e-05	0.00078
regulation of hydrolase activity (GO:0051336)	201	+	1.9e-05	0.000814
lymphocyte migration (GO:0072676)	27	+	1.93e-05	0.000819
negative regulation of peptidase activity (GO:0010466)	40	+	1.96e-05	0.000828
viral process (GO:0016032)	95	+	2.27e-05	0.000956
response to interferon-beta (GO:0035456)	16	+	2.31e-05	0.000972
regulation of programmed cell death (GO:0043067)	262	+	2.33e-05	0.000972
regulation of apoptotic process (GO:0042981)	258	+	2.44e-05	0.00102
regulation of interleukin-6 production (GO:0032675)	40	+	2.47e-05	0.00102
regulation of multicellular organismal process (GO:0051239)	517	+	2.48e-05	0.00102
positive regulation of adaptive immune response (GO:0002821)	33	+	2.74e-05	0.00113
negative regulation of leukocyte cell-cell adhesion (GO:1903038)	40	+	2.96e-05	0.0012
T cell differentiation (GO:0030217)	42	+	3.08e-05	0.00124
cellular response to interleukin-1 (GO:0071347)	45	+	3.19e-05	0.00128
regulation of alpha-beta T cell activation (GO:0046634)	31	+	3.2e-05	0.00128
cellular response to chemokine (GO:1990869)	28	+	3.2e-05	0.00128
response to chemokine (GO:1990868)	28	+	3.2e-05	0.00127
chemokine-mediated signaling pathway (GO:0070098)	28	+	3.2e-05	0.00127
regulation of interferon-gamma production (GO:0032649)	34	+	3.3e-05	0.0013
B cell mediated immunity (GO:0019724)	25	+	3.33e-05	0.0013
regulation of vesicle-mediated transport (GO:0060627)	82	+	3.47e-05	0.00135
regulation of B cell activation (GO:0050864)	39	+	3.47e-05	0.00135
antigen receptor-mediated signaling pathway (GO:0050851)	51	+	3.53e-05	0.00137
regulation of cell population proliferation (GO:0042127)	294	+	3.74e-05	0.00144
negative regulation of biological process (GO:0048519)	696	+	3.79e-05	0.00145
immunoglobulin mediated immune response (GO:0016064)	24	+	3.8e-05	0.00145
negative regulation of leukocyte mediated immunity (GO:0002704)	16	+	3.81e-05	0.00145
negative regulation of lymphocyte activation (GO:0051250)	50	+	3.93e-05	0.00149
positive regulation of secretion (GO:0051047)	82	+	4e-05	0.00151
negative regulation of type I interferon production (GO:0032480)	17	+	4.18e-05	0.00157
regulation of cell killing (GO:0031341)	28	+	4.19e-05	0.00157
negative regulation of T cell activation (GO:0050868)	39	+	4.2e-05	0.00157
positive regulation of leukocyte mediated immunity (GO:0002705)	42	+	4.42e-05	0.00164
positive regulation of hemopoiesis (GO:1903708)	58	+	4.44e-05	0.00164
positive regulation of cytokine biosynthetic process (GO:0042108)	33	+	4.48e-05	0.00165
regulation of cysteine-type endopeptidase activity (GO:2000116)	50	+	4.53e-05	0.00166
positive regulation of interleukin-6 production (GO:0032755)	33	+	4.58e-05	0.00167
regulation of lymphocyte mediated immunity (GO:0002706)	42	+	4.58e-05	0.00167
regulation of proteolysis (GO:0030162)	113	+	4.62e-05	0.00168
regulation of cellular protein metabolic process (GO:0032268)	353	+	4.8e-05	0.00173
negative regulation of proteolysis (GO:0045861)	49	+	5.13e-05	0.00185
modification of morphology or physiology of other organism (GO:0035821)	32	+	5.19e-05	0.00186
negative regulation of protein metabolic process (GO:0051248)	155	+	5.45e-05	0.00195
response to oxygen-containing compound (GO:1901700)	261	+	5.46e-05	0.00194
receptor signaling pathway via JAK-STAT (GO:0007259)	16	+	6.11e-05	0.00217
receptor signaling pathway via STAT (GO:0097696)	16	+	6.11e-05	0.00216
regulation of defense response to virus by host (GO:0050691)	14	+	6.38e-05	0.00225
response to interleukin-1 (GO:0070555)	51	+	6.91e-05	0.00242
regulation of macrophage activation (GO:0043030)	18	+	7.37e-05	0.00258
lymphocyte chemotaxis (GO:0048247)	19	+	7.38e-05	0.00257
positive regulation of cell population proliferation (GO:0008284)	180	+	7.41e-05	0.00257
regulation of receptor signaling pathway via STAT (GO:1904892)	27	+	7.64e-05	0.00264
positive regulation of adaptive immune response based on somatic recombination of immune receptors built from immunoglobulin superfamily domains (GO:0002824)	31	+	7.77e-05	0.00268
negative regulation of hydrolase activity (GO:0051346)	62	+	9.07e-05	0.00311
cellular response to oxygen-containing compound (GO:1901701)	177	+	9.36e-05	0.0032
positive regulation of secretion by cell (GO:1903532)	79	+	0.0001	0.00341
positive regulation of leukocyte differentiation (GO:1902107)	50	+	0.000103	0.0035
regulation of acute inflammatory response (GO:0002673)	14	+	0.000104	0.00351
regulation of lymphocyte chemotaxis (GO:1901623)	7	+	0.000108	0.00363
regulation of myeloid cell differentiation (GO:0045637)	47	+	0.000112	0.00376
regulation of peptide secretion (GO:0002791)	105	+	0.000114	0.0038
positive regulation of programmed cell death (GO:0043068)	127	+	0.000126	0.00421
regulation of B cell proliferation (GO:0030888)	20	+	0.000134	0.00441
pattern recognition receptor signaling pathway (GO:0002221)	41	+	0.000137	0.00451
positive regulation of T cell proliferation (GO:0042102)	34	+	0.000139	0.00455
positive regulation of cytokine-mediated signaling pathway (GO:0001961)	21	+	0.000146	0.00476
positive regulation of cellular metabolic process (GO:0031325)	442	+	0.000152	0.00494
regulation of interleukin-2 production (GO:0032663)	23	+	0.000154	0.00501
response to interferon-alpha (GO:0035455)	13	+	0.000161	0.00519
regulation of interleukin-8 production (GO:0032677)	30	+	0.000164	0.00527
regulation of interferon-beta production (GO:0032648)	19	+	0.000166	0.00532
regulation of receptor signaling pathway via JAK-STAT (GO:0046425)	26	+	0.000167	0.00532
regulation of ERK1 and ERK2 cascade (GO:0070372)	66	+	0.000168	0.00534
regulation of myeloid leukocyte mediated immunity (GO:0002886)	18	+	0.000174	0.00551
positive regulation of apoptotic process (GO:0043065)	126	+	0.000177	0.00557
positive regulation of lymphocyte migration (GO:2000403)	9	+	0.000177	0.00557
regulation of interleukin-10 production (GO:0032653)	22	+	0.000184	0.00577
positive regulation of macromolecule metabolic process (GO:0010604)	440	+	0.000186	0.0058
positive regulation of interferon-gamma production (GO:0032729)	24	+	0.000195	0.00607
regulation of granulocyte chemotaxis (GO:0071622)	16	+	0.000198	0.00615
regulation of lymphocyte migration (GO:2000401)	14	+	0.000201	0.00621
positive regulation of nitrogen compound metabolic process (GO:0051173)	418	+	0.000206	0.00633
positive regulation of peptide secretion (GO:0002793)	65	+	0.000207	0.00637
cell migration (GO:0016477)	170	+	0.000213	0.00651
regulation of interferon-gamma-mediated signaling pathway (GO:0060334)	10	+	0.000214	0.0065
regulation of response to interferon-gamma (GO:0060330)	10	+	0.000214	0.00648
positive regulation of intracellular signal transduction (GO:1902533)	194	+	0.000215	0.00651
regulation of secretion (GO:0051046)	140	+	0.00022	0.00664
positive regulation of multicellular organismal process (GO:0051240)	331	+	0.000226	0.00679
innate immune response-activating signal transduction (GO:0002758)	63	+	0.000229	0.00686
negative regulation of cytokine-mediated signaling pathway (GO:0001960)	13	+	0.000231	0.00689
negative regulation of response to cytokine stimulus (GO:0060761)	13	+	0.000231	0.00687
regulation of protein secretion (GO:0050708)	101	+	0.000235	0.00696
negative regulation of cell adhesion (GO:0007162)	72	+	0.000238	0.00702
negative regulation of cellular protein metabolic process (GO:0032269)	140	+	0.000242	0.00709
positive regulation of defense response to virus by host (GO:0002230)	11	+	0.000242	0.00709
regulation of molecular function (GO:0065009)	433	+	0.000249	0.00725
positive regulation of metabolic process (GO:0009893)	483	+	0.000258	0.00749
T cell migration (GO:0072678)	15	+	0.000262	0.00758
positive regulation of ERK1 and ERK2 cascade (GO:0070374)	51	+	0.00027	0.00776
phagocytosis (GO:0006909)	58	+	0.000274	0.00784
cellular defense response (GO:0006968)	24	+	0.000279	0.00796
positive regulation of B cell activation (GO:0050871)	27	+	0.000291	0.00826
positive regulation of protein secretion (GO:0050714)	62	+	0.000298	0.00841
regulation of T cell mediated immunity (GO:0002709)	19	+	0.000309	0.00866
positive regulation of interleukin-8 production (GO:0032757)	22	+	0.000311	0.0087
positive regulation of biosynthetic process (GO:0009891)	248	+	0.000312	0.00871
negative regulation of cellular process (GO:0048523)	623	+	0.00033	0.00918
leukocyte cell-cell adhesion (GO:0007159)	24	+	0.000367	0.0101
positive regulation of cellular biosynthetic process (GO:0031328)	244	+	0.000369	0.0101
regulation of transport (GO:0051049)	269	+	0.000375	0.0102
positive regulation of type 2 immune response (GO:0002830)	8	+	0.000382	0.0104
negative regulation of interleukin-2 production (GO:0032703)	11	+	0.000402	0.0109
regulation of leukocyte mediated cytotoxicity (GO:0001910)	23	+	0.000427	0.0115
positive regulation of cell motility (GO:2000147)	121	+	0.000436	0.0117
positive regulation of cellular component movement (GO:0051272)	121	+	0.000436	0.0117
macrophage activation (GO:0042116)	23	+	0.000437	0.0117
negative regulation of leukocyte differentiation (GO:1902106)	28	+	0.000438	0.0117
regulation of single stranded viral RNA replication via double stranded DNA intermediate (GO:0045091)	6	+	0.00044	0.0117
negative regulation of hemopoiesis (GO:1903707)	34	+	0.000451	0.012
regulation of leukocyte apoptotic process (GO:2000106)	31	+	0.000452	0.012
T cell receptor signaling pathway (GO:0050852)	39	+	0.00046	0.0121
positive regulation of cell migration (GO:0030335)	119	+	0.000494	0.013
regulation of type 2 immune response (GO:0002828)	13	+	0.000504	0.0132
positive regulation of lymphocyte mediated immunity (GO:0002708)	32	+	0.000508	0.0132
negative regulation of response to stimulus (GO:0048585)	262	+	0.000513	0.0134
regulation of T cell cytokine production (GO:0002724)	9	+	0.000515	0.0134
positive regulation of receptor signaling pathway via STAT (GO:1904894)	20	+	0.000519	0.0134
negative regulation of adaptive immune response (GO:0002820)	11	+	0.000527	0.0136
regulation of antigen processing and presentation (GO:0002577)	13	+	0.000529	0.0136
regulation of erythrocyte differentiation (GO:0045646)	8	+	0.000532	0.0137
regulation of microglial cell activation (GO:1903978)	6	+	0.000561	0.0143
T cell costimulation (GO:0031295)	18	+	0.000574	0.0147
lymphocyte costimulation (GO:0031294)	18	+	0.000574	0.0146
regulation of cysteine-type endopeptidase activity involved in apoptotic process (GO:0043281)	43	+	0.000584	0.0148
regulation of protein phosphorylation (GO:0001932)	215	+	0.000602	0.0152
regulation of signal transduction (GO:0009966)	463	+	0.00061	0.0153
positive regulation of acute inflammatory response (GO:0002675)	12	+	0.000612	0.0154
positive regulation of locomotion (GO:0040017)	123	+	0.00063	0.0158
defense response to Gram-negative bacterium (GO:0050829)	16	+	0.000637	0.0159
negative regulation of adaptive immune response based on somatic recombination of immune receptors built from immunoglobulin superfamily domains (GO:0002823)	10	+	0.000657	0.0164
acute inflammatory response (GO:0002526)	18	+	0.000663	0.0165
positive regulation of T cell migration (GO:2000406)	8	+	0.000667	0.0165
negative regulation of cell-cell adhesion (GO:0022408)	51	+	0.000701	0.0172
negative regulation of leukocyte proliferation (GO:0070664)	27	+	0.00072	0.0176
positive regulation of macromolecule biosynthetic process (GO:0010557)	233	+	0.000722	0.0176
regulation of complement activation (GO:0030449)	12	+	0.000751	0.0182
myeloid leukocyte differentiation (GO:0002573)	35	+	0.00078	0.0189
positive regulation of macrophage activation (GO:0043032)	9	+	0.000782	0.0189
positive regulation of protein phosphorylation (GO:0001934)	167	+	0.000785	0.0189
regulation of neutrophil migration (GO:1902622)	15	+	0.000822	0.0197
regulation of secretion by cell (GO:1903530)	133	+	0.000822	0.0196
regulation of leukocyte degranulation (GO:0043300)	14	+	0.000836	0.0199
membrane fusion (GO:0061025)	20	+	0.000845	0.0201
regulation of interleukin-12 production (GO:0032655)	27	+	0.000855	0.0203
regulation of syncytium formation by plasma membrane fusion (GO:0060142)	7	+	0.000869	0.0205
complement activation (GO:0006956)	10	+	0.000881	0.0208
regulation of CD8-positive, alpha-beta T cell activation (GO:2001185)	10	+	0.0009	0.0212
leukocyte activation involved in inflammatory response (GO:0002269)	14	+	0.000902	0.0212
microglial cell activation (GO:0001774)	14	+	0.000902	0.0211
glial cell activation (GO:0061900)	17	+	0.000915	0.0214
neuroinflammatory response (GO:0150076)	17	+	0.000915	0.0213
positive regulation of B cell proliferation (GO:0030890)	13	+	0.000928	0.0216
negative regulation of mononuclear cell proliferation (GO:0032945)	26	+	0.000932	0.0216
negative regulation of lymphocyte proliferation (GO:0050672)	26	+	0.000932	0.0215
negative regulation of interleukin-10 production (GO:0032693)	8	+	0.000953	0.022
positive regulation of interleukin-1 production (GO:0032732)	25	+	0.000962	0.0221
regulation of angiogenesis (GO:0045765)	75	+	0.001	0.023
negative regulation of cytokine biosynthetic process (GO:0042036)	9	+	0.00103	0.0236
antigen processing and presentation of exogenous peptide antigen via MHC class I (GO:0042590)	22	+	0.00104	0.0236
regulation of phosphorylation (GO:0042325)	234	+	0.00106	0.0241
negative regulation of cell death (GO:0060548)	165	+	0.00111	0.025
cytidine to uridine editing (GO:0016554)	5	+	0.00111	0.025
base conversion or substitution editing (GO:0016553)	5	+	0.00111	0.0249
regulation of cell migration (GO:0030334)	181	+	0.00112	0.0252
complement activation, classical pathway (GO:0006958)	7	+	0.00113	0.0252
reactive oxygen species metabolic process (GO:0072593)	18	+	0.00114	0.0254
regulation of viral entry into host cell (GO:0046596)	12	+	0.00116	0.0257
positive regulation of receptor signaling pathway via JAK-STAT (GO:0046427)	19	+	0.00116	0.0257
homeostatic process (GO:0042592)	233	+	0.00116	0.0257
regulation of nitrogen compound metabolic process (GO:0051171)	624	+	0.00119	0.0262
antigen processing and presentation of peptide antigen via MHC class I (GO:0002474)	29	+	0.0012	0.0265
positive regulation of alpha-beta T cell activation (GO:0046635)	21	+	0.00121	0.0265
humoral immune response mediated by circulating immunoglobulin (GO:0002455)	8	+	0.00121	0.0266
negative regulation of programmed cell death (GO:0043069)	154	+	0.00121	0.0265
acute-phase response (GO:0006953)	12	+	0.00121	0.0265
regulation of tyrosine phosphorylation of STAT protein (GO:0042509)	19	+	0.00123	0.0267
localization of cell (GO:0051674)	179	+	0.00124	0.027
cell motility (GO:0048870)	179	+	0.00124	0.0269
regulation of myoblast fusion (GO:1901739)	6	+	0.00124	0.0269
antigen processing and presentation of peptide antigen (GO:0048002)	45	+	0.00132	0.0286
positive regulation of peptidase activity (GO:0010952)	44	+	0.00133	0.0287
positive regulation of type I interferon production (GO:0032481)	29	+	0.00134	0.0288
regulation of myotube differentiation (GO:0010830)	9	+	0.00135	0.0288
apoptotic signaling pathway (GO:0097190)	79	+	0.00135	0.0288
regulation of epithelial cell apoptotic process (GO:1904035)	20	+	0.00136	0.0289
antigen processing and presentation (GO:0019882)	51	+	0.00137	0.029
regulation of mononuclear cell migration (GO:0071675)	22	+	0.00138	0.0291
negative regulation of apoptotic process (GO:0043066)	150	+	0.00142	0.0299
regulation of T cell apoptotic process (GO:0070232)	12	+	0.00143	0.0301
positive regulation of tumor necrosis factor biosynthetic process (GO:0042535)	11	+	0.00148	0.0309
regulation of establishment of protein localization (GO:0070201)	127	+	0.00148	0.031
positive regulation of protein metabolic process (GO:0051247)	264	+	0.00148	0.0309
regulation of RIG-I signaling pathway (GO:0039535)	4	+	0.0015	0.0311
regulation of viral-induced cytoplasmic pattern recognition receptor signaling pathway (GO:0039531)	4	+	0.0015	0.031
negative regulation of T cell proliferation (GO:0042130)	20	+	0.0015	0.031
positive regulation of T cell apoptotic process (GO:0070234)	4	+	0.00151	0.031
positive regulation of establishment of protein localization (GO:1904951)	78	+	0.00152	0.0312
alpha-beta T cell activation (GO:0046631)	26	+	0.00155	0.0318
negative regulation of cysteine-type endopeptidase activity (GO:2000117)	17	+	0.00156	0.0319
regulation of T cell migration (GO:2000404)	10	+	0.00157	0.032
T cell chemotaxis (GO:0010818)	9	+	0.0016	0.0325
ribonucleoside catabolic process (GO:0042454)	5	+	0.00163	0.0331
regulation of extrinsic apoptotic signaling pathway (GO:2001236)	41	+	0.00167	0.0338
regulation of osteoclast differentiation (GO:0045670)	15	+	0.00167	0.0338
cellular response to interferon-beta (GO:0035458)	8	+	0.00168	0.0338
regulation of monocyte chemotaxis (GO:0090025)	11	+	0.00169	0.0339
positive regulation of signaling receptor activity (GO:2000273)	6	+	0.0017	0.034
negative regulation of antigen receptor-mediated signaling pathway (GO:0050858)	10	+	0.0017	0.034
positive regulation of endopeptidase activity (GO:0010950)	39	+	0.00173	0.0345
regulation of peptide transport (GO:0090087)	128	+	0.00175	0.0348
regulation of cellular metabolic process (GO:0031323)	673	+	0.00178	0.0353
regulation of macrophage chemotaxis (GO:0010758)	10	+	0.00178	0.0353
positive regulation of reactive oxygen species metabolic process (GO:2000379)	31	+	0.00179	0.0353
regulation of macromolecule metabolic process (GO:0060255)	653	+	0.0018	0.0355
positive regulation of MAPK cascade (GO:0043410)	105	+	0.00181	0.0356
positive regulation of neutrophil migration (GO:1902624)	12	+	0.00182	0.0358
negative regulation of viral transcription (GO:0032897)	8	+	0.00183	0.0358
positive regulation of interleukin-1 beta production (GO:0032731)	24	+	0.00184	0.036
cytokine secretion (GO:0050663)	20	+	0.00186	0.0362
antigen processing and presentation of endogenous antigen (GO:0019883)	9	+	0.00191	0.0369
negative regulation of lymphocyte mediated immunity (GO:0002707)	11	+	0.00191	0.0369
response to protozoan (GO:0001562)	9	+	0.00191	0.0369
defense response to protozoan (GO:0042832)	9	+	0.00191	0.0368
positive regulation of mRNA catabolic process (GO:0061014)	5	+	0.00194	0.0373
positive regulation of cellular protein metabolic process (GO:0032270)	241	+	0.00197	0.0378
positive regulation of cytosolic calcium ion concentration (GO:0007204)	70	+	0.00199	0.038
positive regulation of hydrolase activity (GO:0051345)	129	+	0.00204	0.0388
cellular response to interleukin-7 (GO:0098761)	9	+	0.00204	0.0388
response to interleukin-7 (GO:0098760)	9	+	0.00204	0.0387
positive regulation of gene expression (GO:0010628)	247	+	0.00205	0.0389
ribonucleoside metabolic process (GO:0009119)	7	+	0.00206	0.0389
regulation of respiratory burst (GO:0060263)	4	+	0.00209	0.0393
regulation of peptidyl-tyrosine phosphorylation (GO:0050730)	53	+	0.00212	0.0396
regulation of locomotion (GO:0040012)	192	+	0.00219	0.0409
negative regulation of peptide secretion (GO:0002792)	34	+	0.0022	0.041
antigen processing and presentation of exogenous peptide antigen via MHC class I, TAP-dependent (GO:0002479)	20	+	0.00225	0.0416
interleukin-7-mediated signaling pathway (GO:0038111)	8	+	0.00225	0.0416
myeloid cell differentiation (GO:0030099)	49	+	0.00228	0.042
regulation of chemokine production (GO:0032642)	32	+	0.00231	0.0425
regulation of alpha-beta T cell differentiation (GO:0046637)	20	+	0.00232	0.0426
negative regulation of leukocyte mediated cytotoxicity (GO:0001911)	8	+	0.00232	0.0425
negative regulation of cell killing (GO:0031342)	8	+	0.00232	0.0424
regulation of T cell chemotaxis (GO:0010819)	4	+	0.00233	0.0425
positive regulation of tyrosine phosphorylation of STAT protein (GO:0042531)	17	+	0.00233	0.0424
negative regulation of cytokine secretion (GO:0050710)	21	+	0.00234	0.0425
positive regulation of granulocyte chemotaxis (GO:0071624)	11	+	0.00236	0.0427
positive regulation of neutrophil chemotaxis (GO:0090023)	11	+	0.00236	0.0427
regulation of neutrophil chemotaxis (GO:0090022)	11	+	0.00236	0.0426
positive regulation of T cell cytokine production (GO:0002726)	7	+	0.0024	0.0432
regulation of CD4-positive, alpha-beta T cell activation (GO:2000514)	19	+	0.00246	0.0443
regulation of myeloid leukocyte differentiation (GO:0002761)	26	+	0.00249	0.0447
regulation of lymphocyte apoptotic process (GO:0070228)	18	+	0.00255	0.0457
production of molecular mediator involved in inflammatory response (GO:0002532)	7	+	0.00256	0.0458
positive regulation of peptidyl-tyrosine phosphorylation (GO:0050731)	45	+	0.00257	0.0458
production of molecular mediator of immune response (GO:0002440)	17	+	0.00257	0.0458
regulation of ribonuclease activity (GO:0060700)	5	+	0.00258	0.0458
regulation of MAPK cascade (GO:0043408)	127	+	0.00262	0.0465
positive regulation of phosphorylation (GO:0042327)	179	+	0.00263	0.0466
regulation of mast cell activation (GO:0033003)	12	+	0.00268	0.0474
regulation of dendritic cell antigen processing and presentation (GO:0002604)	9	+	0.00273	0.0481
antibacterial humoral response (GO:0019731)	6	+	0.00274	0.0482
positive regulation of lymphocyte chemotaxis (GO:0140131)	4	+	0.00275	0.0483
positive regulation of nitric oxide biosynthetic process (GO:0045429)	15	+	0.00277	0.0485
regulation of intracellular signal transduction (GO:1902531)	278	+	0.00277	0.0485
negative regulation of leukocyte apoptotic process (GO:2000107)	20	+	0.00277	0.0484
regulation of primary metabolic process (GO:0080090)	647	+	0.0028	0.0487
T cell selection (GO:0045058)	17	+	0.00281	0.0487
regulation of apoptotic signaling pathway (GO:2001233)	66	+	0.00281	0.0488
positive regulation of interferon-beta production (GO:0032728)	14	+	0.00282	0.0487
regulation of cell motility (GO:2000145)	186	+	0.00285	0.0492
positive regulation of cell killing (GO:0031343)	20	+	0.00288	0.0496
cell projection organization (GO:0030030)	124	-	1.81e-07	1.35e-05
plasma membrane bounded cell projection organization (GO:0120036)	120	-	2.88e-07	1.94e-05
nervous system development (GO:0007399)	270	-	1.37e-06	7.8e-05
neuron differentiation (GO:0030182)	115	-	2.86e-06	0.00015
neuron development (GO:0048666)	98	-	8.47e-06	0.000405
neuron projection development (GO:0031175)	79	-	2.8e-05	0.00114
generation of neurons (GO:0048699)	182	-	3.02e-05	0.00122
central nervous system development (GO:0007417)	113	-	0.000128	0.00426
adult behavior (GO:0030534)	15	-	0.000129	0.00427
neurogenesis (GO:0022008)	197	-	0.000165	0.00531
brain development (GO:0007420)	79	-	0.00021	0.00642
anion transmembrane transport (GO:0098656)	35	-	0.000238	0.00701
cell morphogenesis involved in neuron differentiation (GO:0048667)	50	-	0.000255	0.00743
cell part morphogenesis (GO:0032990)	62	-	0.000269	0.00774
neuron projection morphogenesis (GO:0048812)	55	-	0.000285	0.0081
plasma membrane bounded cell projection morphogenesis (GO:0120039)	56	-	0.000295	0.00835
male gamete generation (GO:0048232)	37	-	0.000304	0.00855
cilium assembly (GO:0060271)	19	-	0.000334	0.00926
cell projection morphogenesis (GO:0048858)	58	-	0.000346	0.00957
cilium organization (GO:0044782)	21	-	0.000371	0.0102
behavior (GO:0007610)	62	-	0.000379	0.0103
locomotory behavior (GO:0007626)	21	-	0.000475	0.0125
spinal cord development (GO:0021510)	10	-	0.000608	0.0153
forebrain development (GO:0030900)	45	-	0.000667	0.0165
regulation of cell morphogenesis involved in differentiation (GO:0010769)	47	-	0.000691	0.017
spermatogenesis (GO:0007283)	36	-	0.000691	0.017
trans-synaptic signaling (GO:0099537)	45	-	0.000739	0.018
Unclassified (UNCLASSIFIED)	105	-	0.000799	0.0192
head development (GO:0060322)	86	-	0.000973	0.0223
synaptic signaling (GO:0099536)	51	-	0.00105	0.0238
axonogenesis (GO:0007409)	46	-	0.00113	0.0253
positive regulation of neuron differentiation (GO:0045666)	44	-	0.00134	0.0287
limb development (GO:0060173)	21	-	0.00136	0.0289
appendage development (GO:0048736)	21	-	0.00136	0.0288
glutamate receptor signaling pathway (GO:0007215)	7	-	0.00149	0.031
gamete generation (GO:0007276)	52	-	0.0015	0.0311
plasma membrane bounded cell projection assembly (GO:0120031)	35	-	0.00157	0.0321
pattern specification process (GO:0007389)	38	-	0.00177	0.0353
chemical synaptic transmission (GO:0007268)	41	-	0.0019	0.037
anterograde trans-synaptic signaling (GO:0098916)	41	-	0.0019	0.0369
drug transmembrane transport (GO:0006855)	8	-	0.00196	0.0377
dorsal/ventral pattern formation (GO:0009953)	11	-	0.00208	0.0392
axon development (GO:0061564)	51	-	0.00211	0.0396
non-motile cilium assembly (GO:1905515)	5	-	0.00211	0.0395
anion transport (GO:0006820)	66	-	0.00215	0.0401
ion transmembrane transport (GO:0034220)	102	-	0.00221	0.041
regulation of cardiac conduction (GO:1903779)	7	-	0.00224	0.0415
regulation of synaptic plasticity (GO:0048167)	30	-	0.00238	0.0429
sexual reproduction (GO:0019953)	63	-	0.00278	0.0484

## Sheet: SpCord_9dpi_CC-GOs_FDR<0.05
GO cellular component complete	Number of genes	Shift to greater values(+)/Shift to smaller values(-)	pvalue	FDR
secretory granule (GO:0030141)	258	+	5.55e-16	4.33e-13
extracellular space (GO:0005615)	817	+	1.53e-14	7.97e-12
external side of plasma membrane (GO:0009897)	116	+	2.09e-14	8.15e-12
extracellular region (GO:0005576)	1037	+	2.25e-14	7.04e-12
cytoplasmic vesicle (GO:0031410)	698	+	2.89e-13	7.51e-11
intracellular vesicle (GO:0097708)	699	+	3.44e-13	7.67e-11
side of membrane (GO:0098552)	175	+	7.26e-13	1.42e-10
secretory vesicle (GO:0099503)	295	+	1.5e-12	2.61e-10
vesicle (GO:0031982)	1074	+	3.29e-11	4.28e-09
cytoplasmic vesicle lumen (GO:0060205)	104	+	2.33e-10	2.8e-08
tertiary granule (GO:0070820)	58	+	2.53e-10	2.82e-08
vesicle lumen (GO:0031983)	105	+	4.97e-10	5.17e-08
secretory granule lumen (GO:0034774)	101	+	5.95e-10	5.8e-08
cell surface (GO:0009986)	285	+	1.27e-08	1.04e-06
specific granule (GO:0042581)	68	+	2.46e-08	1.83e-06
lytic vacuole (GO:0000323)	207	+	3.54e-08	2.4e-06
lysosome (GO:0005764)	207	+	3.54e-08	2.3e-06
endomembrane system (GO:0012505)	1238	+	8.59e-08	4.97e-06
secretory granule membrane (GO:0030667)	110	+	1.81e-07	9.4e-06
vesicle membrane (GO:0012506)	234	+	3.34e-07	1.68e-05
cytoplasmic vesicle membrane (GO:0030659)	230	+	3.74e-07	1.77e-05
vacuole (GO:0005773)	231	+	5.5e-07	2.38e-05
blood microparticle (GO:0072562)	27	+	7.96e-07	3.36e-05
extracellular exosome (GO:0070062)	571	+	9.2e-07	3.78e-05
extracellular organelle (GO:0043230)	579	+	1.19e-06	4.65e-05
extracellular vesicle (GO:1903561)	578	+	1.62e-06	6.02e-05
whole membrane (GO:0098805)	499	+	1.74e-06	6.3e-05
azurophil granule (GO:0042582)	52	+	2.88e-06	9.77e-05
primary lysosome (GO:0005766)	52	+	2.88e-06	9.56e-05
intrinsic component of plasma membrane (GO:0031226)	464	+	2.95e-06	9.59e-05
integral component of plasma membrane (GO:0005887)	448	+	5.32e-06	0.000166
endocytic vesicle membrane (GO:0030666)	60	+	5.93e-06	0.000182
tertiary granule lumen (GO:1904724)	15	+	5.97e-06	0.000179
collagen-containing extracellular matrix (GO:0062023)	126	+	1.5e-05	0.000426
phagocytic vesicle (GO:0045335)	46	+	1.53e-05	0.000426
phagocytic vesicle membrane (GO:0030670)	25	+	2.51e-05	0.000663
immunoglobulin complex (GO:0019814)	9	+	2.36e-05	0.000672
endoplasmic reticulum (GO:0005783)	379	+	2.82e-05	0.000733
specific granule membrane (GO:0035579)	40	+	4.3e-05	0.00105
bounding membrane of organelle (GO:0098588)	585	+	4.31e-05	0.00103
extracellular matrix (GO:0031012)	157	+	4.74e-05	0.00111
vacuolar lumen (GO:0005775)	49	+	5.65e-05	0.00128
azurophil granule lumen (GO:0035578)	27	+	6.18e-05	0.00138
organelle membrane (GO:0031090)	894	+	7.03e-05	0.00155
immunological synapse (GO:0001772)	22	+	0.000125	0.00257
endosome (GO:0005768)	276	+	0.000135	0.00273
endocytic vesicle (GO:0030139)	105	+	0.000143	0.00286
ficolin-1-rich granule membrane (GO:0101003)	21	+	0.000143	0.00283
plasma membrane (GO:0005886)	1368	+	0.000176	0.00335
integral component of membrane (GO:0016021)	1281	+	0.000188	0.00348
intrinsic component of membrane (GO:0031224)	1310	+	0.00022	0.004
specific granule lumen (GO:0035580)	27	+	0.000227	0.00407
integral component of endoplasmic reticulum membrane (GO:0030176)	50	+	0.000255	0.00447
cell periphery (GO:0071944)	1405	+	0.000298	0.00517
tertiary granule membrane (GO:0070821)	33	+	0.000369	0.0062
intrinsic component of endoplasmic reticulum membrane (GO:0031227)	54	+	0.000524	0.00843
cell (GO:0005623)	309	+	0.000641	0.00991
endoplasmic reticulum membrane (GO:0005789)	279	+	0.000775	0.0116
endoplasmic reticulum lumen (GO:0005788)	97	+	0.00104	0.0154
MHC protein complex (GO:0042611)	6	+	0.00113	0.0164
MHC class I peptide loading complex (GO:0042824)	6	+	0.00114	0.0163
platelet alpha granule lumen (GO:0031093)	24	+	0.00114	0.0162
nuclear outer membrane-endoplasmic reticulum membrane network (GO:0042175)	286	+	0.00126	0.0174
lytic vacuole membrane (GO:0098852)	109	+	0.00127	0.0174
lysosomal membrane (GO:0005765)	109	+	0.00127	0.0172
membrane (GO:0016020)	2278	+	0.00129	0.0173
AIM2 inflammasome complex (GO:0097169)	5	+	0.00129	0.0173
inflammasome complex (GO:0061702)	7	+	0.00133	0.0176
NLRP3 inflammasome complex (GO:0072559)	5	+	0.00138	0.0179
integral component of lumenal side of endoplasmic reticulum membrane (GO:0071556)	8	+	0.0015	0.0194
lumenal side of endoplasmic reticulum membrane (GO:0098553)	8	+	0.0015	0.0192
lumenal side of membrane (GO:0098576)	10	+	0.00152	0.0192
endoplasmic reticulum-Golgi intermediate compartment membrane (GO:0033116)	26	+	0.00163	0.0205
P-body (GO:0000932)	31	+	0.00165	0.0206
T cell receptor complex (GO:0042101)	10	+	0.00198	0.0244
platelet alpha granule (GO:0031091)	30	+	0.00246	0.0295
endosome lumen (GO:0031904)	15	+	0.0029	0.0346
I-kappaB/NF-kappaB complex (GO:0033256)	6	+	0.00338	0.0397
MHC class II protein complex (GO:0042613)	4	+	0.00423	0.0486
vacuolar membrane (GO:0005774)	122	+	0.00436	0.0496
endoplasmic reticulum-Golgi intermediate compartment (GO:0005793)	43	+	0.00439	0.0493
cilium (GO:0005929)	159	-	4.44e-16	6.93e-13
plasma membrane bounded cell projection (GO:0120025)	613	-	1.17e-11	1.82e-09
cell projection (GO:0042995)	636	-	2e-11	2.84e-09
cytoskeleton (GO:0005856)	602	-	5.65e-09	5.19e-07
cytoplasmic region (GO:0099568)	78	-	6.83e-09	5.92e-07
microtubule cytoskeleton (GO:0015630)	354	-	2.41e-08	1.88e-06
synapse (GO:0045202)	385	-	3.32e-08	2.36e-06
plasma membrane bounded cell projection cytoplasm (GO:0032838)	64	-	6.04e-08	3.77e-06
neuron projection (GO:0043005)	391	-	7.18e-08	4.31e-06
ciliary plasm (GO:0097014)	37	-	1.01e-07	5.62e-06
axoneme (GO:0005930)	37	-	1.01e-07	5.43e-06
motile cilium (GO:0031514)	49	-	3.41e-07	1.66e-05
neuron to neuron synapse (GO:0098984)	115	-	4.37e-07	2.01e-05
postsynapse (GO:0098794)	190	-	5.39e-07	2.4e-05
synaptic membrane (GO:0097060)	131	-	1.01e-06	4.04e-05
asymmetric synapse (GO:0032279)	110	-	1.34e-06	5.11e-05
microtubule (GO:0005874)	128	-	1.98e-06	7.03e-05
postsynaptic density (GO:0014069)	108	-	2.06e-06	7.15e-05
postsynaptic specialization (GO:0099572)	114	-	3.12e-06	9.93e-05
axon (GO:0030424)	203	-	8.97e-06	0.000264
glutamatergic synapse (GO:0098978)	119	-	1.32e-05	0.000382
postsynaptic specialization membrane (GO:0099634)	40	-	2.38e-05	0.000651
postsynaptic membrane (GO:0045211)	89	-	2.43e-05	0.000654
ciliary basal body (GO:0036064)	37	-	2.88e-05	0.000736
supramolecular polymer (GO:0099081)	252	-	3.59e-05	0.000904
supramolecular fiber (GO:0099512)	246	-	3.94e-05	0.000976
intrinsic component of synaptic membrane (GO:0099240)	53	-	4.73e-05	0.00112
ciliary tip (GO:0097542)	18	-	5.11e-05	0.00117
microtubule organizing center (GO:0005815)	229	-	8.81e-05	0.00191
intraciliary transport particle B (GO:0030992)	10	-	8.98e-05	0.00192
presynapse (GO:0098793)	137	-	9.26e-05	0.00195
postsynaptic density membrane (GO:0098839)	34	-	0.000123	0.00256
presynaptic membrane (GO:0042734)	51	-	0.00015	0.00292
centrosome (GO:0005813)	181	-	0.000175	0.00336
dynein complex (GO:0030286)	14	-	0.000181	0.0034
intrinsic component of postsynaptic specialization membrane (GO:0098948)	22	-	0.000208	0.00381
intraciliary transport particle (GO:0030990)	13	-	0.000246	0.00437
ion channel complex (GO:0034702)	61	-	0.000308	0.00529
integral component of synaptic membrane (GO:0099699)	49	-	0.000352	0.00598
cation channel complex (GO:0034703)	48	-	0.000426	0.00708
polymeric cytoskeletal fiber (GO:0099513)	191	-	0.000432	0.0071
ciliary transition zone (GO:0035869)	22	-	0.00048	0.00781
transmembrane transporter complex (GO:1902495)	64	-	0.000539	0.00858
transporter complex (GO:1990351)	64	-	0.000539	0.00849
integral component of postsynaptic specialization membrane (GO:0099060)	21	-	0.000573	0.00895
somatodendritic compartment (GO:0036477)	247	-	0.000653	0.00999
dendritic tree (GO:0097447)	182	-	0.000774	0.0117
main axon (GO:0044304)	26	-	0.000938	0.0139
intrinsic component of postsynaptic density membrane (GO:0099146)	16	-	0.00111	0.0162
cell junction (GO:0030054)	411	-	0.00115	0.0162
dendrite (GO:0030425)	181	-	0.00117	0.0163
intrinsic component of postsynaptic membrane (GO:0098936)	35	-	0.00137	0.018
intrinsic component of presynaptic membrane (GO:0098889)	28	-	0.00178	0.022
GABA-ergic synapse (GO:0098982)	23	-	0.00212	0.0259
axon terminus (GO:0043679)	34	-	0.00213	0.0283
photoreceptor connecting cilium (GO:0032391)	12	-	0.00242	0.0293
neuronal cell body (GO:0043025)	145	-	0.00285	0.0351
integral component of postsynaptic density membrane (GO:0099061)	15	-	0.00318	0.0376
filopodium (GO:0030175)	40	-	0.00348	0.0405
spindle pole (GO:0000922)	58	-	0.00352	0.0407
plasma membrane region (GO:0098590)	341	-	0.00439	0.0496

## Sheet: SpCord_9dpi_BP-GOs_FDR<0.05
GO biological process complete	Number of genes	Shift to greater values(+)/Shift to smaller values(-)	pvalue	FDR
positive regulation of cell adhesion (GO:0045785)	179	+	0	0
humoral immune response (GO:0006959)	69	+	0	0
immune response (GO:0006955)	571	+	0	0
inflammatory response (GO:0006954)	204	+	0	0
defense response (GO:0006952)	466	+	0	0
response to stress (GO:0006950)	1064	+	0	0
response to cytokine (GO:0034097)	431	+	0	0
type I interferon signaling pathway (GO:0060337)	42	+	0	0
neutrophil mediated immunity (GO:0002446)	177	+	0	0
myeloid leukocyte mediated immunity (GO:0002444)	183	+	0	0
leukocyte mediated immunity (GO:0002443)	225	+	0	0
response to organic substance (GO:0010033)	952	+	0	0
positive regulation of leukocyte cell-cell adhesion (GO:1903039)	105	+	0	0
regulation of leukocyte cell-cell adhesion (GO:1903037)	136	+	0	0
cytokine-mediated signaling pathway (GO:0019221)	282	+	0	0
immune system process (GO:0002376)	852	+	0	0
leukocyte activation involved in immune response (GO:0002366)	231	+	0	0
cell surface receptor signaling pathway (GO:0007166)	772	+	0	0
signal transduction (GO:0007165)	1378	+	0	0
positive regulation of cytokine production (GO:0001819)	180	+	0	0
negative regulation of cytokine production (GO:0001818)	105	+	0	0
regulation of cytokine production (GO:0001817)	276	+	0	0
regulation of mononuclear cell proliferation (GO:0032944)	92	+	0	0
neutrophil activation involved in immune response (GO:0002283)	176	+	0	0
myeloid cell activation involved in immune response (GO:0002275)	188	+	0	0
myeloid leukocyte activation (GO:0002274)	215	+	0	0
cell activation involved in immune response (GO:0002263)	232	+	0	0
activation of immune response (GO:0002253)	181	+	0	0
immune effector process (GO:0002252)	367	+	0	0
adaptive immune response (GO:0002250)	127	+	0	0
response to molecule of bacterial origin (GO:0002237)	152	+	0	0
leukocyte activation (GO:0045321)	339	+	0	0
cell activation (GO:0001775)	387	+	0	0
regulation of leukocyte differentiation (GO:1902105)	114	+	0	0
cellular response to type I interferon (GO:0071357)	42	+	0	0
cellular response to interferon-gamma (GO:0071346)	72	+	0	0
cellular response to cytokine stimulus (GO:0071345)	395	+	0	0
regulation of innate immune response (GO:0045088)	173	+	0	0
innate immune response (GO:0045087)	262	+	0	0
cellular response to organic substance (GO:0071310)	774	+	0	0
regulated exocytosis (GO:0045055)	237	+	0	0
response to other organism (GO:0051707)	455	+	0	0
multi-organism process (GO:0051704)	814	+	0	0
cellular response to chemical stimulus (GO:0070887)	899	+	0	0
cellular response to lipopolysaccharide (GO:0071222)	95	+	0	0
cellular response to molecule of bacterial origin (GO:0071219)	97	+	0	0
cellular response to biotic stimulus (GO:0071216)	106	+	0	0
defense response to virus (GO:0051607)	108	+	0	0
response to lipopolysaccharide (GO:0032496)	148	+	0	0
negative regulation of multi-organism process (GO:0043901)	95	+	0	0
regulation of multi-organism process (GO:0043900)	279	+	0	0
regulation of leukocyte proliferation (GO:0070663)	96	+	0	0
leukocyte migration (GO:0050900)	127	+	0	0
positive regulation of response to stimulus (GO:0048584)	757	+	0	0
positive regulation of T cell activation (GO:0050870)	95	+	0	0
positive regulation of cell activation (GO:0050867)	145	+	0	0
regulation of cell activation (GO:0050865)	223	+	0	0
regulation of T cell activation (GO:0050863)	132	+	0	0
positive regulation of response to external stimulus (GO:0032103)	226	+	0	0
regulation of response to external stimulus (GO:0032101)	381	+	0	0
positive regulation of lymphocyte activation (GO:0051251)	125	+	0	0
regulation of lymphocyte activation (GO:0051249)	177	+	0	0
positive regulation of immune response (GO:0050778)	270	+	0	0
negative regulation of immune response (GO:0050777)	56	+	0	0
regulation of immune response (GO:0050776)	374	+	0	0
regulation of inflammatory response (GO:0050727)	124	+	0	0
response to bacterium (GO:0009617)	220	+	0	0
response to virus (GO:0009615)	135	+	0	0
response to biotic stimulus (GO:0009607)	462	+	0	0
response to external stimulus (GO:0009605)	775	+	0	0
regulation of lymphocyte proliferation (GO:0050670)	91	+	0	0
defense response to other organism (GO:0098542)	325	+	0	0
granulocyte activation (GO:0036230)	182	+	0	0
neutrophil degranulation (GO:0043312)	174	+	0	0
positive regulation of defense response (GO:0031349)	173	+	0	0
regulation of defense response (GO:0031347)	277	+	0	0
leukocyte degranulation (GO:0043299)	181	+	0	0
response to external biotic stimulus (GO:0043207)	455	+	0	0
defense response to bacterium (GO:0042742)	69	+	0	0
regulation of hemopoiesis (GO:1903706)	168	+	0	0
lymphocyte activation (GO:0046649)	151	+	0	0
response to chemical (GO:0042221)	1197	+	0	0
regulation of cell population proliferation (GO:0042127)	537	+	0	0
regulation of cell adhesion (GO:0030155)	285	+	0	0
neutrophil activation (GO:0042119)	180	+	0	0
regulation of response to biotic stimulus (GO:0002831)	202	+	0	0
positive regulation of cell-cell adhesion (GO:0022409)	122	+	0	0
regulation of cell-cell adhesion (GO:0022407)	169	+	0	0
response to interferon-gamma (GO:0034341)	81	+	0	0
response to type I interferon (GO:0034340)	45	+	0	0
immune response-regulating signaling pathway (GO:0002764)	174	+	0	0
immune response-activating signal transduction (GO:0002757)	160	+	0	0
regulation of response to stress (GO:0080134)	497	+	0	0
regulation of immune effector process (GO:0002697)	157	+	0	0
positive regulation of leukocyte activation (GO:0002696)	141	+	0	0
negative regulation of leukocyte activation (GO:0002695)	81	+	0	0
regulation of leukocyte activation (GO:0002694)	208	+	0	0
positive regulation of immune system process (GO:0002684)	395	+	0	0
negative regulation of immune system process (GO:0002683)	181	+	0	0
regulation of immune system process (GO:0002682)	552	+	0	0
leukocyte differentiation (GO:0002521)	133	+	1.11e-16	1.32e-14
negative regulation of cell activation (GO:0050866)	90	+	1.11e-16	1.3e-14
T cell activation (GO:0042110)	92	+	1.11e-16	1.29e-14
response to lipid (GO:0033993)	298	+	1.11e-16	1.28e-14
positive regulation of response to biotic stimulus (GO:0002833)	137	+	2.22e-16	2.53e-14
regulation of cell death (GO:0010941)	557	+	4.44e-16	5.02e-14
response to stimulus (GO:0050896)	2174	+	5.55e-16	6.21e-14
positive regulation of multi-organism process (GO:0043902)	173	+	6.66e-16	7.39e-14
regulation of apoptotic process (GO:0042981)	516	+	6.66e-16	7.32e-14
positive regulation of innate immune response (GO:0045089)	131	+	9.99e-16	1.09e-13
secretion by cell (GO:0032940)	325	+	1.22e-15	1.32e-13
regulation of peptidase activity (GO:0052547)	132	+	1.44e-15	1.54e-13
negative regulation of lymphocyte activation (GO:0051250)	68	+	1.44e-15	1.53e-13
regulation of response to stimulus (GO:0048583)	1269	+	1.55e-15	1.63e-13
leukocyte chemotaxis (GO:0030595)	56	+	1.89e-15	1.97e-13
positive regulation of cell population proliferation (GO:0008284)	314	+	1.89e-15	1.95e-13
secretion (GO:0046903)	347	+	2e-15	2.05e-13
response to oxygen-containing compound (GO:1901700)	524	+	3.55e-15	3.61e-13
response to tumor necrosis factor (GO:0034612)	103	+	3.55e-15	3.57e-13
cellular response to tumor necrosis factor (GO:0071356)	93	+	3.89e-15	3.88e-13
regulation of programmed cell death (GO:0043067)	522	+	4.11e-15	4.07e-13
immune system development (GO:0002520)	222	+	4.22e-15	4.14e-13
exocytosis (GO:0006887)	260	+	7.88e-15	7.67e-13
positive regulation of cell death (GO:0010942)	268	+	7.99e-15	7.72e-13
regulation of viral process (GO:0050792)	80	+	8.88e-15	8.51e-13
regulation of symbiosis, encompassing mutualism through parasitism (GO:0043903)	82	+	9.77e-15	9.28e-13
regulation of lymphocyte differentiation (GO:0045619)	70	+	1.05e-14	9.94e-13
hematopoietic or lymphoid organ development (GO:0048534)	211	+	1.63e-14	1.53e-12
signaling (GO:0023052)	1473	+	2.03e-14	1.89e-12
cell chemotaxis (GO:0060326)	71	+	2.1e-14	1.93e-12
negative regulation of viral process (GO:0048525)	55	+	2.82e-14	2.58e-12
antimicrobial humoral response (GO:0019730)	35	+	3.64e-14	3.3e-12
apoptotic process (GO:0006915)	313	+	3.67e-14	3.31e-12
regulation of endopeptidase activity (GO:0052548)	122	+	5.9e-14	5.27e-12
export from cell (GO:0140352)	336	+	6.21e-14	5.5e-12
positive regulation of immune effector process (GO:0002699)	90	+	7.28e-14	6.41e-12
hemopoiesis (GO:0030097)	201	+	7.51e-14	6.56e-12
regulation of response to cytokine stimulus (GO:0060759)	75	+	7.61e-14	6.6e-12
adaptive immune response based on somatic recombination of immune receptors built from immunoglobulin superfamily domains (GO:0002460)	59	+	8.4e-14	7.24e-12
myeloid leukocyte migration (GO:0097529)	48	+	1.14e-13	9.74e-12
cell communication (GO:0007154)	1504	+	1.2e-13	1.02e-11
regulation of viral life cycle (GO:1903900)	63	+	1.26e-13	1.06e-11
cellular response to stimulus (GO:0051716)	1764	+	1.36e-13	1.14e-11
regulation of leukocyte mediated immunity (GO:0002703)	83	+	1.52e-13	1.27e-11
cell killing (GO:0001906)	31	+	1.67e-13	1.38e-11
cell death (GO:0008219)	340	+	1.92e-13	1.58e-11
programmed cell death (GO:0012501)	328	+	2.01e-13	1.63e-11
negative regulation of multicellular organismal process (GO:0051241)	405	+	3.3e-13	2.67e-11
positive regulation of hemopoiesis (GO:1903708)	79	+	3.36e-13	2.7e-11
lymphocyte mediated immunity (GO:0002449)	53	+	3.5e-13	2.79e-11
positive regulation of leukocyte differentiation (GO:1902107)	67	+	3.66e-13	2.9e-11
regulation of T cell differentiation (GO:0045580)	58	+	4.03e-13	3.17e-11
regulation of T cell proliferation (GO:0042129)	65	+	6.47e-13	5.06e-11
regulation of cytokine-mediated signaling pathway (GO:0001959)	68	+	7.12e-13	5.54e-11
positive regulation of leukocyte proliferation (GO:0070665)	62	+	8.18e-13	6.32e-11
negative regulation of T cell activation (GO:0050868)	52	+	8.81e-13	6.76e-11
granulocyte migration (GO:0097530)	33	+	9.28e-13	7.08e-11
negative regulation of defense response (GO:0031348)	74	+	9.49e-13	7.2e-11
immune response-regulating cell surface receptor signaling pathway (GO:0002768)	122	+	1.06e-12	7.96e-11
neutrophil migration (GO:1990266)	31	+	1.34e-12	1e-10
positive regulation of signal transduction (GO:0009967)	568	+	1.53e-12	1.14e-10
granulocyte chemotaxis (GO:0071621)	32	+	1.55e-12	1.15e-10
activation of innate immune response (GO:0002218)	99	+	1.56e-12	1.15e-10
lymphocyte differentiation (GO:0030098)	97	+	1.67e-12	1.22e-10
positive regulation of mononuclear cell proliferation (GO:0032946)	59	+	1.73e-12	1.25e-10
positive regulation of intracellular signal transduction (GO:1902533)	366	+	1.77e-12	1.27e-10
neutrophil chemotaxis (GO:0030593)	30	+	2.23e-12	1.6e-10
negative regulation of leukocyte cell-cell adhesion (GO:1903038)	57	+	2.3e-12	1.64e-10
positive regulation of programmed cell death (GO:0043068)	250	+	3.79e-12	2.67e-10
regulation of cytokine biosynthetic process (GO:0042035)	54	+	3.82e-12	2.67e-10
positive regulation of lymphocyte proliferation (GO:0050671)	58	+	4.01e-12	2.79e-10
regulation of production of molecular mediator of immune response (GO:0002700)	58	+	4.15e-12	2.87e-10
interferon-gamma-mediated signaling pathway (GO:0060333)	40	+	4.34e-12	2.98e-10
regulation of tumor necrosis factor superfamily cytokine production (GO:1903555)	76	+	4.36e-12	2.98e-10
innate immune response-activating signal transduction (GO:0002758)	89	+	4.81e-12	3.27e-10
regulation of B cell activation (GO:0050864)	58	+	4.87e-12	3.3e-10
positive regulation of apoptotic process (GO:0043065)	248	+	5.38e-12	3.62e-10
positive regulation of biological process (GO:0048518)	1786	+	9.73e-12	6.51e-10
negative regulation of viral life cycle (GO:1903901)	49	+	1.02e-11	6.81e-10
regulation of adaptive immune response (GO:0002819)	73	+	1.9e-11	1.25e-09
cellular response to lipid (GO:0071396)	191	+	2.14e-11	1.4e-09
immune response-activating cell surface receptor signaling pathway (GO:0002429)	110	+	2.17e-11	1.41e-09
defense response to Gram-positive bacterium (GO:0050830)	31	+	2.34e-11	1.51e-09
cellular response to oxygen-containing compound (GO:1901701)	357	+	2.4e-11	1.55e-09
regulation of cytokine production involved in immune response (GO:0002718)	36	+	2.41e-11	1.54e-09
regulation of tumor necrosis factor production (GO:0032680)	74	+	2.9e-11	1.85e-09
chemokine-mediated signaling pathway (GO:0070098)	30	+	4.23e-11	2.68e-09
cytokine production (GO:0001816)	60	+	4.42e-11	2.79e-09
positive regulation of lymphocyte differentiation (GO:0045621)	44	+	4.54e-11	2.85e-09
negative regulation of apoptotic process (GO:0043066)	299	+	5.2e-11	3.24e-09
positive regulation of cytokine biosynthetic process (GO:0042108)	38	+	5.35e-11	3.32e-09
negative regulation of programmed cell death (GO:0043069)	305	+	6.6e-11	4.07e-09
regulation of interleukin-8 production (GO:0032677)	35	+	6.99e-11	4.29e-09
positive regulation of signaling (GO:0023056)	612	+	7.59e-11	4.64e-09
regulation of proteolysis (GO:0030162)	222	+	7.62e-11	4.63e-09
positive regulation of inflammatory response (GO:0050729)	57	+	8.18e-11	4.95e-09
regulation of leukocyte migration (GO:0002685)	88	+	8.85e-11	5.33e-09
positive regulation of cell communication (GO:0010647)	609	+	9.74e-11	5.83e-09
pattern recognition receptor signaling pathway (GO:0002221)	62	+	1.07e-10	6.35e-09
regulation of viral genome replication (GO:0045069)	50	+	1.23e-10	7.28e-09
negative regulation of peptidase activity (GO:0010466)	62	+	1.31e-10	7.71e-09
cellular response to chemokine (GO:1990869)	34	+	1.52e-10	8.94e-09
response to chemokine (GO:1990868)	34	+	1.52e-10	8.89e-09
regulation of adaptive immune response based on somatic recombination of immune receptors built from immunoglobulin superfamily domains (GO:0002822)	64	+	1.81e-10	1.05e-08
regulation of protein metabolic process (GO:0051246)	851	+	1.93e-10	1.12e-08
negative regulation of protein metabolic process (GO:0051248)	338	+	1.97e-10	1.13e-08
regulation of cytokine secretion (GO:0050707)	85	+	2.03e-10	1.16e-08
negative regulation of immune effector process (GO:0002698)	49	+	2.14e-10	1.22e-08
regulation of interferon-gamma production (GO:0032649)	38	+	2.2e-10	1.25e-08
negative regulation of catalytic activity (GO:0043086)	233	+	2.31e-10	1.3e-08
lymphocyte migration (GO:0072676)	30	+	2.42e-10	1.36e-08
phagocytosis (GO:0006909)	79	+	2.69e-10	1.5e-08
negative regulation of endopeptidase activity (GO:0010951)	61	+	3.14e-10	1.75e-08
positive regulation of T cell differentiation (GO:0045582)	39	+	3.29e-10	1.82e-08
negative regulation of response to external stimulus (GO:0032102)	127	+	3.9e-10	2.15e-08
negative regulation of cell-cell adhesion (GO:0022408)	72	+	4.02e-10	2.21e-08
negative regulation of cell population proliferation (GO:0008285)	237	+	5.25e-10	2.87e-08
negative regulation of molecular function (GO:0044092)	342	+	5.83e-10	3.17e-08
apoptotic signaling pathway (GO:0097190)	120	+	5.88e-10	3.19e-08
regulation of apoptotic signaling pathway (GO:2001233)	132	+	6.69e-10	3.59e-08
regulation of cellular protein metabolic process (GO:0032268)	803	+	8.15e-10	4.36e-08
negative regulation of cell death (GO:0060548)	331	+	9.27e-10	4.93e-08
antimicrobial humoral immune response mediated by antimicrobial peptide (GO:0061844)	24	+	9.37e-10	4.97e-08
positive regulation of phagocytosis (GO:0050766)	36	+	1.06e-09	5.6e-08
regulation of catalytic activity (GO:0050790)	717	+	1.27e-09	6.65e-08
cell migration (GO:0016477)	303	+	1.27e-09	6.62e-08
positive regulation of cellular process (GO:0048522)	1604	+	1.31e-09	6.78e-08
tumor necrosis factor-mediated signaling pathway (GO:0033209)	44	+	1.37e-09	7.05e-08
regulation of alpha-beta T cell activation (GO:0046634)	37	+	1.44e-09	7.42e-08
regulation of phagocytosis (GO:0050764)	42	+	1.45e-09	7.45e-08
regulation of interleukin-6 production (GO:0032675)	56	+	1.69e-09	8.63e-08
negative regulation of viral genome replication (GO:0045071)	40	+	1.81e-09	9.16e-08
regulation of angiogenesis (GO:0045765)	137	+	1.81e-09	9.14e-08
positive regulation of multicellular organismal process (GO:0051240)	614	+	1.82e-09	9.12e-08
modification of morphology or physiology of other organism (GO:0035821)	56	+	1.94e-09	9.67e-08
disruption of cells of other organism (GO:0044364)	19	+	2e-09	9.92e-08
killing of cells of other organism (GO:0031640)	19	+	2e-09	9.88e-08
interspecies interaction between organisms (GO:0044419)	255	+	2.04e-09	1.01e-07
regulation of cysteine-type endopeptidase activity (GO:2000116)	82	+	2.53e-09	1.23e-07
regulation of I-kappaB kinase/NF-kappaB signaling (GO:0043122)	95	+	2.59e-09	1.26e-07
regulation of vasculature development (GO:1901342)	150	+	2.86e-09	1.39e-07
negative regulation of innate immune response (GO:0045824)	20	+	3.23e-09	1.55e-07
regulation of multicellular organismal process (GO:0051239)	1006	+	3.55e-09	1.69e-07
positive regulation of receptor signaling pathway via JAK-STAT (GO:0046427)	32	+	3.66e-09	1.74e-07
negative regulation of response to biotic stimulus (GO:0002832)	34	+	3.71e-09	1.76e-07
regulation of intracellular signal transduction (GO:1902531)	587	+	4.04e-09	1.9e-07
regulation of receptor signaling pathway via JAK-STAT (GO:0046425)	52	+	4.07e-09	1.91e-07
regulation of receptor signaling pathway via STAT (GO:1904892)	53	+	4.68e-09	2.19e-07
T cell differentiation (GO:0030217)	53	+	4.7e-09	2.19e-07
positive regulation of receptor signaling pathway via STAT (GO:1904894)	33	+	4.9e-09	2.28e-07
response to interleukin-1 (GO:0070555)	79	+	5.18e-09	2.39e-07
positive regulation of I-kappaB kinase/NF-kappaB signaling (GO:0043123)	79	+	5.62e-09	2.59e-07
negative regulation of proteolysis (GO:0045861)	91	+	5.93e-09	2.72e-07
negative regulation of hemopoiesis (GO:1903707)	63	+	6.17e-09	2.82e-07
vesicle-mediated transport (GO:0016192)	549	+	6.26e-09	2.85e-07
regulation of type I interferon production (GO:0032479)	66	+	6.31e-09	2.86e-07
negative regulation of response to stimulus (GO:0048585)	529	+	6.31e-09	2.85e-07
positive regulation of reactive oxygen species metabolic process (GO:2000379)	45	+	6.78e-09	3.05e-07
negative regulation of cellular protein metabolic process (GO:0032269)	317	+	8.53e-09	3.83e-07
regulation of molecular function (GO:0065009)	926	+	8.97e-09	4.01e-07
cellular response to interleukin-1 (GO:0071347)	71	+	9.63e-09	4.29e-07
regulation of ERK1 and ERK2 cascade (GO:0070372)	116	+	9.82e-09	4.36e-07
positive regulation of interleukin-8 production (GO:0032757)	27	+	1.08e-08	4.78e-07
regulation of reactive oxygen species metabolic process (GO:2000377)	72	+	1.21e-08	5.32e-07
regulation of peptidyl-tyrosine phosphorylation (GO:0050730)	86	+	1.23e-08	5.38e-07
regulation of cysteine-type endopeptidase activity involved in apoptotic process (GO:0043281)	72	+	1.28e-08	5.57e-07
regulation of lymphocyte mediated immunity (GO:0002706)	59	+	1.36e-08	5.92e-07
response to organic cyclic compound (GO:0014070)	295	+	1.39e-08	6.04e-07
negative regulation of biological process (GO:0048519)	1508	+	1.43e-08	6.17e-07
regulation of cell killing (GO:0031341)	33	+	1.53e-08	6.57e-07
positive regulation of leukocyte migration (GO:0002687)	63	+	1.65e-08	7.08e-07
negative regulation of leukocyte differentiation (GO:1902106)	49	+	1.75e-08	7.47e-07
positive regulation of T cell proliferation (GO:0042102)	42	+	1.78e-08	7.57e-07
lymphocyte chemotaxis (GO:0048247)	20	+	1.84e-08	7.81e-07
toll-like receptor signaling pathway (GO:0002224)	48	+	2.05e-08	8.66e-07
negative regulation of inflammatory response (GO:0050728)	49	+	2.22e-08	9.37e-07
negative regulation of leukocyte mediated immunity (GO:0002704)	20	+	2.28e-08	9.57e-07
macrophage activation (GO:0042116)	28	+	2.28e-08	9.55e-07
positive regulation of tumor necrosis factor superfamily cytokine production (GO:1903557)	47	+	2.39e-08	9.98e-07
regulation of interleukin-12 production (GO:0032655)	31	+	2.4e-08	9.97e-07
regulation of DNA-binding transcription factor activity (GO:0051090)	149	+	2.84e-08	1.17e-06
positive regulation of leukocyte chemotaxis (GO:0002690)	40	+	3.12e-08	1.29e-06
lipopolysaccharide-mediated signaling pathway (GO:0031663)	22	+	3.22e-08	1.32e-06
antigen receptor-mediated signaling pathway (GO:0050851)	71	+	3.35e-08	1.37e-06
regulation of leukocyte chemotaxis (GO:0002688)	51	+	3.45e-08	1.41e-06
regulation of interleukin-2 production (GO:0032663)	29	+	3.59e-08	1.46e-06
response to toxic substance (GO:0009636)	159	+	3.63e-08	1.47e-06
regulation of protein phosphorylation (GO:0001932)	464	+	4.6e-08	1.86e-06
regulation of type 2 immune response (GO:0002828)	18	+	4.92e-08	1.98e-06
positive regulation of cellular metabolic process (GO:0031325)	1015	+	5.13e-08	2.05e-06
regulation of protein secretion (GO:0050708)	151	+	5.23e-08	2.09e-06
positive regulation of tumor necrosis factor production (GO:0032760)	46	+	5.91e-08	2.35e-06
positive regulation of cytokine secretion (GO:0050715)	57	+	6.42e-08	2.54e-06
myeloid leukocyte differentiation (GO:0002573)	45	+	6.56e-08	2.59e-06
antigen processing and presentation of peptide antigen via MHC class I (GO:0002474)	37	+	6.85e-08	2.7e-06
positive regulation of metabolic process (GO:0009893)	1104	+	7.6e-08	2.98e-06
positive regulation of peptidyl-tyrosine phosphorylation (GO:0050731)	69	+	8.53e-08	3.34e-06
positive regulation of protein metabolic process (GO:0051247)	565	+	8.73e-08	3.4e-06
negative regulation of leukocyte proliferation (GO:0070664)	33	+	8.8e-08	3.42e-06
regulation of body fluid levels (GO:0050878)	134	+	9.14e-08	3.54e-06
regulation of hydrolase activity (GO:0051336)	396	+	9.15e-08	3.53e-06
leukocyte cell-cell adhesion (GO:0007159)	29	+	9.79e-08	3.77e-06
regulation of leukocyte apoptotic process (GO:2000106)	41	+	1e-07	3.84e-06
antigen processing and presentation (GO:0019882)	71	+	1.11e-07	4.26e-06
positive regulation of production of molecular mediator of immune response (GO:0002702)	42	+	1.15e-07	4.39e-06
positive regulation of leukocyte mediated immunity (GO:0002705)	55	+	1.16e-07	4.4e-06
positive regulation of response to cytokine stimulus (GO:0060760)	28	+	1.2e-07	4.54e-06
regulation of peptide secretion (GO:0002791)	158	+	1.23e-07	4.63e-06
regulation of phosphorylation (GO:0042325)	510	+	1.23e-07	4.65e-06
positive regulation of interferon-gamma production (GO:0032729)	24	+	1.25e-07	4.69e-06
positive regulation of cellular protein metabolic process (GO:0032270)	526	+	1.29e-07	4.84e-06
positive regulation of interleukin-6 production (GO:0032755)	40	+	1.34e-07	5.01e-06
positive regulation of protein phosphorylation (GO:0001934)	338	+	1.36e-07	5.05e-06
regulation of extrinsic apoptotic signaling pathway (GO:2001236)	65	+	1.36e-07	5.04e-06
regulation of signal transduction (GO:0009966)	967	+	1.39e-07	5.15e-06
response to reactive oxygen species (GO:0000302)	77	+	1.56e-07	5.75e-06
positive regulation of alpha-beta T cell activation (GO:0046635)	24	+	1.65e-07	6.06e-06
response to antibiotic (GO:0046677)	106	+	1.78e-07	6.52e-06
response to interferon-beta (GO:0035456)	17	+	1.81e-07	6.59e-06
angiogenesis (GO:0001525)	126	+	1.89e-07	6.86e-06
positive regulation of phosphorus metabolic process (GO:0010562)	380	+	1.98e-07	7.15e-06
positive regulation of phosphate metabolic process (GO:0045937)	380	+	1.98e-07	7.13e-06
regulation of humoral immune response (GO:0002920)	22	+	2.09e-07	7.52e-06
negative regulation of mononuclear cell proliferation (GO:0032945)	32	+	2.1e-07	7.54e-06
negative regulation of lymphocyte proliferation (GO:0050672)	32	+	2.1e-07	7.52e-06
negative regulation of cell adhesion (GO:0007162)	116	+	2.2e-07	7.83e-06
positive regulation of cellular component movement (GO:0051272)	222	+	2.3e-07	8.19e-06
regulation of hemostasis (GO:1900046)	29	+	2.33e-07	8.24e-06
regulation of blood coagulation (GO:0030193)	29	+	2.33e-07	8.22e-06
defense response to Gram-negative bacterium (GO:0050829)	22	+	2.36e-07	8.32e-06
positive regulation of cell motility (GO:2000147)	220	+	2.44e-07	8.55e-06
regulation of interleukin-1 production (GO:0032652)	40	+	2.47e-07	8.64e-06
positive regulation of macromolecule metabolic process (GO:0010604)	1024	+	2.5e-07	8.74e-06
T cell activation involved in immune response (GO:0002286)	34	+	2.61e-07	9.08e-06
positive regulation of phosphorylation (GO:0042327)	359	+	2.66e-07	9.22e-06
leukocyte proliferation (GO:0070661)	29	+	2.9e-07	1e-05
regulation of B cell proliferation (GO:0030888)	30	+	2.91e-07	1e-05
natural killer cell activation (GO:0030101)	18	+	2.95e-07	1.01e-05
mononuclear cell migration (GO:0071674)	19	+	2.99e-07	1.02e-05
positive regulation of B cell activation (GO:0050871)	37	+	3.01e-07	1.03e-05
negative regulation of peptide secretion (GO:0002792)	47	+	3.2e-07	1.09e-05
intracellular signal transduction (GO:0035556)	572	+	3.32e-07	1.13e-05
positive regulation of locomotion (GO:0040017)	226	+	3.37e-07	1.14e-05
negative regulation of secretion by cell (GO:1903531)	64	+	3.44e-07	1.16e-05
regulation of coagulation (GO:0050818)	32	+	3.51e-07	1.19e-05
positive regulation of tyrosine phosphorylation of STAT protein (GO:0042531)	26	+	3.7e-07	1.24e-05
positive regulation of vasculature development (GO:1904018)	91	+	3.75e-07	1.26e-05
cellular defense response (GO:0006968)	30	+	4.08e-07	1.37e-05
positive regulation of nitrogen compound metabolic process (GO:0051173)	970	+	4.17e-07	1.39e-05
monocyte chemotaxis (GO:0002548)	17	+	4.18e-07	1.39e-05
response to abiotic stimulus (GO:0009628)	337	+	4.2e-07	1.39e-05
myeloid cell differentiation (GO:0030099)	78	+	4.9e-07	1.62e-05
negative regulation of protein secretion (GO:0050709)	43	+	4.95e-07	1.63e-05
lymphocyte activation involved in immune response (GO:0002285)	51	+	5.18e-07	1.7e-05
response to wounding (GO:0009611)	182	+	5.4e-07	1.77e-05
cellular response to toxic substance (GO:0097237)	69	+	5.65e-07	1.85e-05
positive regulation of apoptotic signaling pathway (GO:2001235)	66	+	5.68e-07	1.85e-05
I-kappaB kinase/NF-kappaB signaling (GO:0007249)	39	+	5.73e-07	1.87e-05
positive regulation of cell migration (GO:0030335)	216	+	5.79e-07	1.88e-05
response to protozoan (GO:0001562)	11	+	5.88e-07	1.89e-05
defense response to protozoan (GO:0042832)	11	+	5.88e-07	1.89e-05
positive regulation of ERK1 and ERK2 cascade (GO:0070374)	77	+	6.41e-07	2.05e-05
response to oxidative stress (GO:0006979)	133	+	6.55e-07	2.09e-05
regulation of leukocyte mediated cytotoxicity (GO:0001910)	27	+	6.67e-07	2.12e-05
positive regulation of cytokine-mediated signaling pathway (GO:0001961)	23	+	7.12e-07	2.26e-05
antigen processing and presentation of exogenous peptide antigen via MHC class I (GO:0042590)	29	+	7.15e-07	2.26e-05
blood vessel morphogenesis (GO:0048514)	161	+	7.27e-07	2.29e-05
B cell mediated immunity (GO:0019724)	32	+	7.44e-07	2.34e-05
regulation of cell migration (GO:0030334)	336	+	7.83e-07	2.45e-05
negative regulation of cellular process (GO:0048523)	1365	+	7.89e-07	2.47e-05
response to drug (GO:0042493)	298	+	8.02e-07	2.5e-05
positive regulation of interleukin-1 production (GO:0032732)	23	+	8.05e-07	2.5e-05
negative regulation of tumor necrosis factor superfamily cytokine production (GO:1903556)	27	+	8.47e-07	2.63e-05
regulation of chemokine production (GO:0032642)	38	+	8.62e-07	2.67e-05
regulation of macrophage activation (GO:0043030)	25	+	8.7e-07	2.69e-05
localization of cell (GO:0051674)	331	+	8.71e-07	2.68e-05
cell motility (GO:0048870)	331	+	8.71e-07	2.68e-05
negative regulation of production of molecular mediator of immune response (GO:0002701)	15	+	8.82e-07	2.7e-05
negative regulation of cysteine-type endopeptidase activity (GO:2000117)	25	+	8.84e-07	2.7e-05
alpha-beta T cell activation (GO:0046631)	31	+	9e-07	2.74e-05
positive regulation of transport (GO:0051050)	321	+	9.33e-07	2.84e-05
regulation of antigen receptor-mediated signaling pathway (GO:0050854)	31	+	9.37e-07	2.84e-05
positive regulation of protein modification process (GO:0031401)	412	+	9.42e-07	2.85e-05
receptor signaling pathway via JAK-STAT (GO:0007259)	22	+	1.06e-06	3.2e-05
receptor signaling pathway via STAT (GO:0097696)	22	+	1.06e-06	3.19e-05
response to nitrogen compound (GO:1901698)	339	+	1.14e-06	3.41e-05
positive regulation of peptidase activity (GO:0010952)	74	+	1.15e-06	3.45e-05
negative regulation of type I interferon production (GO:0032480)	24	+	1.18e-06	3.51e-05
positive regulation of biosynthetic process (GO:0009891)	614	+	1.27e-06	3.77e-05
negative regulation of adaptive immune response (GO:0002820)	20	+	1.29e-06	3.83e-05
regulation of MAPK cascade (GO:0043408)	263	+	1.29e-06	3.82e-05
positive regulation of adaptive immune response based on somatic recombination of immune receptors built from immunoglobulin superfamily domains (GO:0002824)	45	+	1.34e-06	3.97e-05
negative regulation of hydrolase activity (GO:0051346)	125	+	1.35e-06	3.98e-05
negative regulation of lymphocyte mediated immunity (GO:0002707)	14	+	1.36e-06	4e-05
positive regulation of cytokine production involved in immune response (GO:0002720)	23	+	1.45e-06	4.27e-05
regulation of antigen processing and presentation (GO:0002577)	14	+	1.49e-06	4.35e-05
regulation of interleukin-10 production (GO:0032653)	23	+	1.57e-06	4.59e-05
negative regulation of lymphocyte differentiation (GO:0045620)	25	+	1.59e-06	4.63e-05
negative regulation of cytokine production involved in immune response (GO:0002719)	11	+	1.61e-06	4.69e-05
negative regulation of nitrogen compound metabolic process (GO:0051172)	678	+	1.61e-06	4.68e-05
regulation of tyrosine phosphorylation of STAT protein (GO:0042509)	30	+	1.62e-06	4.69e-05
extrinsic apoptotic signaling pathway (GO:0097191)	43	+	1.8e-06	5.2e-05
T cell selection (GO:0045058)	15	+	1.87e-06	5.37e-05
positive regulation of cellular biosynthetic process (GO:0031328)	604	+	1.89e-06	5.41e-05
negative regulation of protein transport (GO:0051224)	59	+	1.95e-06	5.57e-05
response to interferon-alpha (GO:0035455)	14	+	1.95e-06	5.56e-05
regulation of locomotion (GO:0040012)	371	+	2.05e-06	5.84e-05
regulation of protein transport (GO:0051223)	229	+	2.1e-06	5.95e-05
positive regulation of nitric oxide metabolic process (GO:1904407)	25	+	2.12e-06	6e-05
regulation of establishment of protein localization (GO:0070201)	240	+	2.17e-06	6.12e-05
positive regulation of interleukin-12 production (GO:0032735)	21	+	2.19e-06	6.17e-05
negative regulation of T cell proliferation (GO:0042130)	25	+	2.21e-06	6.2e-05
regulation of extrinsic apoptotic signaling pathway via death domain receptors (GO:1902041)	28	+	2.23e-06	6.24e-05
negative regulation of T cell differentiation (GO:0045581)	22	+	2.32e-06	6.49e-05
regulation of T cell receptor signaling pathway (GO:0050856)	19	+	2.4e-06	6.69e-05
immunoglobulin mediated immune response (GO:0016064)	30	+	2.42e-06	6.75e-05
regulation of myeloid cell differentiation (GO:0045637)	82	+	2.46e-06	6.83e-05
positive regulation of DNA-binding transcription factor activity (GO:0051091)	97	+	2.53e-06	7.02e-05
leukocyte activation involved in inflammatory response (GO:0002269)	19	+	2.6e-06	7.18e-05
microglial cell activation (GO:0001774)	19	+	2.6e-06	7.16e-05
negative regulation of establishment of protein localization (GO:1904950)	60	+	2.63e-06	7.23e-05
negative regulation of tumor necrosis factor production (GO:0032720)	26	+	2.75e-06	7.55e-05
acute inflammatory response (GO:0002526)	23	+	2.75e-06	7.55e-05
negative regulation of cytokine secretion (GO:0050710)	25	+	2.8e-06	7.65e-05
T cell receptor signaling pathway (GO:0050852)	57	+	2.82e-06	7.7e-05
positive regulation of alpha-beta T cell differentiation (GO:0046638)	17	+	2.86e-06	7.78e-05
regulation of toll-like receptor signaling pathway (GO:0034121)	28	+	2.94e-06	7.96e-05
negative regulation of cysteine-type endopeptidase activity involved in apoptotic process (GO:0043154)	22	+	2.95e-06	7.99e-05
regulation of phosphorus metabolic process (GO:0051174)	563	+	2.98e-06	8.05e-05
negative regulation of secretion (GO:0051048)	72	+	3e-06	8.08e-05
wound healing (GO:0042060)	148	+	3.08e-06	8.27e-05
regulation of phosphate metabolic process (GO:0019220)	562	+	3.13e-06	8.37e-05
regulation of defense response to virus (GO:0050688)	39	+	3.2e-06	8.54e-05
positive regulation of angiogenesis (GO:0045766)	82	+	3.3e-06	8.79e-05
regulation of peptide transport (GO:0090087)	236	+	3.37e-06	8.96e-05
regulation of cell motility (GO:2000145)	353	+	3.5e-06	9.28e-05
negative regulation of apoptotic signaling pathway (GO:2001234)	74	+	3.51e-06	9.3e-05
regulation of myeloid leukocyte differentiation (GO:0002761)	50	+	3.57e-06	9.44e-05
antigen processing and presentation of peptide antigen (GO:0048002)	63	+	3.57e-06	9.42e-05
regulation of CD4-positive, alpha-beta T cell activation (GO:2000514)	22	+	3.59e-06	9.45e-05
antigen processing and presentation of exogenous peptide antigen via MHC class I, TAP-dependent (GO:0002479)	27	+	3.81e-06	0.0001
regulation of intrinsic apoptotic signaling pathway (GO:2001242)	53	+	3.91e-06	0.000102
positive regulation of interleukin-1 beta production (GO:0032731)	21	+	3.92e-06	0.000103
positive regulation of pri-miRNA transcription by RNA polymerase II (GO:1902895)	16	+	3.93e-06	0.000102
positive regulation of peptide secretion (GO:0002793)	90	+	3.95e-06	0.000103
regulation of alpha-beta T cell differentiation (GO:0046637)	25	+	4.05e-06	0.000105
positive regulation of reactive oxygen species biosynthetic process (GO:1903428)	25	+	4.1e-06	0.000106
B cell activation (GO:0042113)	60	+	4.15e-06	0.000107
regulation of signaling (GO:0023051)	1079	+	4.19e-06	0.000108
regulation of granulocyte chemotaxis (GO:0071622)	17	+	4.33e-06	0.000112
positive regulation of protein secretion (GO:0050714)	87	+	4.35e-06	0.000112
regulation of myeloid leukocyte mediated immunity (GO:0002886)	24	+	4.47e-06	0.000115
vasculature development (GO:0001944)	193	+	4.48e-06	0.000115
positive regulation of NF-kappaB transcription factor activity (GO:0051092)	63	+	4.49e-06	0.000115
regulation of cell communication (GO:0010646)	1068	+	4.66e-06	0.000119
response to hydrogen peroxide (GO:0042542)	47	+	4.67e-06	0.000119
positive regulation of chemotaxis (GO:0050921)	62	+	4.78e-06	0.000121
homeostatic process (GO:0042592)	455	+	5.02e-06	0.000127
response to oxygen levels (GO:0070482)	116	+	5.1e-06	0.000129
regulation of protein modification process (GO:0031399)	591	+	5.34e-06	0.000135
activation of cysteine-type endopeptidase activity involved in apoptotic process (GO:0006919)	40	+	5.44e-06	0.000137
mononuclear cell proliferation (GO:0032943)	24	+	5.44e-06	0.000137
lymphocyte proliferation (GO:0046651)	24	+	5.44e-06	0.000136
locomotion (GO:0040011)	406	+	5.46e-06	0.000136
positive regulation of nitric oxide biosynthetic process (GO:0045429)	24	+	5.5e-06	0.000137
regulation of neuroinflammatory response (GO:0150077)	18	+	5.57e-06	0.000139
positive regulation of myeloid cell differentiation (GO:0045639)	35	+	5.67e-06	0.000141
positive regulation of molecular function (GO:0044093)	590	+	5.69e-06	0.000141
regulation of chemotaxis (GO:0050920)	88	+	5.71e-06	0.000141
cardiovascular system development (GO:0072358)	194	+	5.76e-06	0.000142
regulation of lymphocyte apoptotic process (GO:0070228)	25	+	5.88e-06	0.000145
positive regulation of MAPK cascade (GO:0043410)	202	+	6.11e-06	0.00015
blood vessel development (GO:0001568)	189	+	6.71e-06	0.000165
positive regulation of adaptive immune response (GO:0002821)	48	+	6.88e-06	0.000168
negative regulation of cellular metabolic process (GO:0031324)	730	+	6.9e-06	0.000169
symbiotic process (GO:0044403)	233	+	7.39e-06	0.00018
regulation of mononuclear cell migration (GO:0071675)	28	+	7.39e-06	0.00018
aging (GO:0007568)	100	+	7.61e-06	0.000185
necroptotic process (GO:0070266)	14	+	7.64e-06	0.000185
positive regulation of cell killing (GO:0031343)	23	+	8.2e-06	0.000198
T cell migration (GO:0072678)	16	+	8.82e-06	0.000212
negative regulation of adaptive immune response based on somatic recombination of immune receptors built from immunoglobulin superfamily domains (GO:0002823)	17	+	8.86e-06	0.000213
regulation of leukocyte degranulation (GO:0043300)	21	+	1.02e-05	0.000244
negative regulation of extrinsic apoptotic signaling pathway via death domain receptors (GO:1902042)	18	+	1.03e-05	0.000245
regulation of lymphocyte migration (GO:2000401)	23	+	1.06e-05	0.000252
response to alcohol (GO:0097305)	79	+	1.07e-05	0.000255
response to dsRNA (GO:0043331)	24	+	1.13e-05	0.000268
negative regulation of interleukin-2 production (GO:0032703)	13	+	1.16e-05	0.000275
positive regulation of myeloid leukocyte differentiation (GO:0002763)	25	+	1.19e-05	0.000282
regulation of CD4-positive, alpha-beta T cell differentiation (GO:0043370)	21	+	1.21e-05	0.000285
regulation of interleukin-1 beta production (GO:0032651)	34	+	1.21e-05	0.000285
negative regulation of signaling (GO:0023057)	426	+	1.29e-05	0.000303
cellular homeostasis (GO:0019725)	244	+	1.32e-05	0.00031
negative regulation of transport (GO:0051051)	151	+	1.35e-05	0.000316
regulation of interleukin-17 production (GO:0032660)	9	+	1.38e-05	0.000323
glial cell activation (GO:0061900)	24	+	1.42e-05	0.000332
regulation of regulatory T cell differentiation (GO:0045589)	15	+	1.44e-05	0.000334
positive regulation of macromolecule biosynthetic process (GO:0010557)	579	+	1.45e-05	0.000338
leukocyte mediated cytotoxicity (GO:0001909)	12	+	1.54e-05	0.000356
positive regulation of chemokine production (GO:0032722)	32	+	1.56e-05	0.00036
positive regulation of gene expression (GO:0010628)	614	+	1.67e-05	0.000384
regulation of interleukin-2 biosynthetic process (GO:0045076)	12	+	1.68e-05	0.000387
platelet degranulation (GO:0002576)	42	+	1.87e-05	0.000429
response to hypoxia (GO:0001666)	107	+	1.88e-05	0.000431
necrotic cell death (GO:0070265)	18	+	1.95e-05	0.000447
programmed necrotic cell death (GO:0097300)	18	+	1.95e-05	0.000446
homeostasis of number of cells (GO:0048872)	76	+	1.96e-05	0.000446
positive regulation of endopeptidase activity (GO:0010950)	65	+	1.97e-05	0.000448
reactive oxygen species metabolic process (GO:0072593)	25	+	2.02e-05	0.000459
regulation of interferon-beta production (GO:0032648)	29	+	2.04e-05	0.000462
negative regulation of cell communication (GO:0010648)	424	+	2.06e-05	0.000466
cellular response to external stimulus (GO:0071496)	136	+	2.08e-05	0.000469
negative regulation of signal transduction (GO:0009968)	397	+	2.12e-05	0.000477
cellular response to stress (GO:0033554)	527	+	2.18e-05	0.000491
T cell costimulation (GO:0031295)	25	+	2.19e-05	0.00049
lymphocyte costimulation (GO:0031294)	25	+	2.19e-05	0.000489
regulation of CD8-positive, alpha-beta T cell activation (GO:2001185)	10	+	2.2e-05	0.000491
regulation of immunoglobulin production (GO:0002637)	30	+	2.21e-05	0.000492
cellular response to oxidative stress (GO:0034599)	89	+	2.23e-05	0.000497
regulation of nitric oxide biosynthetic process (GO:0045428)	34	+	2.32e-05	0.000514
taxis (GO:0042330)	187	+	2.33e-05	0.000518
regulation of cellular component movement (GO:0051270)	372	+	2.36e-05	0.000522
response to fungus (GO:0009620)	17	+	2.39e-05	0.000529
positive regulation of B cell proliferation (GO:0030890)	18	+	2.41e-05	0.000531
regulation of protein localization (GO:0032880)	330	+	2.5e-05	0.00055
chemotaxis (GO:0006935)	186	+	2.53e-05	0.000556
negative regulation of metabolic process (GO:0009892)	805	+	2.58e-05	0.000565
B cell proliferation (GO:0042100)	13	+	2.61e-05	0.000572
response to decreased oxygen levels (GO:0036293)	108	+	2.65e-05	0.000578
regulation of viral entry into host cell (GO:0046596)	14	+	2.71e-05	0.000592
regulation of leukocyte adhesion to vascular endothelial cell (GO:1904994)	13	+	2.8e-05	0.000609
response to peptide (GO:1901652)	156	+	2.82e-05	0.000614
response to organonitrogen compound (GO:0010243)	306	+	2.91e-05	0.000632
regulation of T cell mediated immunity (GO:0002709)	28	+	2.93e-05	0.000635
leukocyte homeostasis (GO:0001776)	30	+	2.93e-05	0.000634
tube development (GO:0035295)	292	+	2.94e-05	0.000633
positive regulation of lymphocyte mediated immunity (GO:0002708)	44	+	2.97e-05	0.000639
response to exogenous dsRNA (GO:0043330)	22	+	2.98e-05	0.00064
eosinophil chemotaxis (GO:0048245)	8	+	2.99e-05	0.000642
eosinophil migration (GO:0072677)	8	+	2.99e-05	0.000641
regulation of defense response to virus by host (GO:0050691)	23	+	3.07e-05	0.000655
negative regulation of cytokine biosynthetic process (GO:0042036)	13	+	3.16e-05	0.000672
regulation of reactive oxygen species biosynthetic process (GO:1903426)	40	+	3.28e-05	0.000695
regulation of T cell apoptotic process (GO:0070232)	13	+	3.3e-05	0.000699
cellular response to antibiotic (GO:0071236)	45	+	3.36e-05	0.000711
positive regulation of defense response to virus by host (GO:0002230)	16	+	3.39e-05	0.000716
lymphocyte homeostasis (GO:0002260)	23	+	3.4e-05	0.000718
response to interleukin-4 (GO:0070670)	14	+	3.5e-05	0.000737
TRIF-dependent toll-like receptor signaling pathway (GO:0035666)	14	+	3.64e-05	0.000765
MyD88-independent toll-like receptor signaling pathway (GO:0002756)	14	+	3.64e-05	0.000764
negative regulation of B cell activation (GO:0050869)	17	+	3.74e-05	0.000783
positive regulation of secretion (GO:0051047)	129	+	3.8e-05	0.000794
negative regulation of macromolecule metabolic process (GO:0010605)	739	+	4.09e-05	0.000851
positive regulation of cysteine-type endopeptidase activity (GO:2001056)	59	+	4.13e-05	0.000859
positive regulation of secretion by cell (GO:1903532)	121	+	4.22e-05	0.000876
positive regulation of cysteine-type endopeptidase activity involved in apoptotic process (GO:0043280)	52	+	4.39e-05	0.00091
NIK/NF-kappaB signaling (GO:0038061)	28	+	4.51e-05	0.000932
positive regulation of leukocyte adhesion to vascular endothelial cell (GO:1904996)	11	+	4.62e-05	0.000954
alpha-beta T cell differentiation (GO:0046632)	24	+	4.67e-05	0.000963
cellular response to mechanical stimulus (GO:0071260)	33	+	4.73e-05	0.000973
regulation of interleukin-1 secretion (GO:0050704)	17	+	4.84e-05	0.000994
cellular response to reactive oxygen species (GO:0034614)	55	+	5e-05	0.00102
regulation of secretion by cell (GO:1903530)	225	+	5.08e-05	0.00104
regulation of interferon-alpha production (GO:0032647)	19	+	5.24e-05	0.00107
B cell differentiation (GO:0030183)	45	+	5.44e-05	0.00111
Fc receptor signaling pathway (GO:0038093)	61	+	5.53e-05	0.00112
positive regulation of type I interferon production (GO:0032481)	45	+	5.62e-05	0.00114
cellular response to drug (GO:0035690)	128	+	5.64e-05	0.00114
neuroinflammatory response (GO:0150076)	25	+	5.67e-05	0.00114
positive regulation of establishment of protein localization (GO:1904951)	144	+	5.84e-05	0.00118
antigen processing and presentation of exogenous peptide antigen (GO:0002478)	57	+	5.84e-05	0.00117
antigen processing and presentation of exogenous antigen (GO:0019884)	57	+	5.84e-05	0.00117
regulation of calcium ion transport (GO:0051924)	88	+	5.94e-05	0.00119
cellular response to interleukin-4 (GO:0071353)	13	+	5.99e-05	0.0012
positive regulation of type 2 immune response (GO:0002830)	9	+	6.01e-05	0.0012
regulation of transferase activity (GO:0051338)	318	+	6.09e-05	0.00122
regulation of dendritic cell antigen processing and presentation (GO:0002604)	9	+	6.47e-05	0.00129
cellular response to interferon-beta (GO:0035458)	9	+	6.53e-05	0.0013
positive regulation of proteolysis (GO:0045862)	130	+	6.62e-05	0.00131
negative regulation of extrinsic apoptotic signaling pathway (GO:2001237)	44	+	6.71e-05	0.00133
negative regulation of antigen receptor-mediated signaling pathway (GO:0050858)	12	+	6.75e-05	0.00133
positive regulation of CD4-positive, alpha-beta T cell activation (GO:2000516)	11	+	6.83e-05	0.00135
positive regulation of CD4-positive, alpha-beta T cell differentiation (GO:0043372)	11	+	6.83e-05	0.00135
positive regulation of catalytic activity (GO:0043085)	479	+	6.96e-05	0.00137
positive regulation of leukocyte apoptotic process (GO:2000108)	12	+	7.23e-05	0.00142
regulation of natural killer cell mediated cytotoxicity (GO:0042269)	16	+	7.29e-05	0.00143
regulation of natural killer cell mediated immunity (GO:0002715)	16	+	7.29e-05	0.00143
tube morphogenesis (GO:0035239)	233	+	7.32e-05	0.00143
positive regulation of developmental process (GO:0051094)	496	+	7.53e-05	0.00147
response to inorganic substance (GO:0010035)	162	+	7.65e-05	0.00149
regulation of pri-miRNA transcription by RNA polymerase II (GO:1902893)	20	+	7.94e-05	0.00154
intrinsic apoptotic signaling pathway (GO:0097193)	59	+	8.05e-05	0.00156
regulation of hormone metabolic process (GO:0032350)	17	+	8.21e-05	0.00159
positive regulation of protein transport (GO:0051222)	135	+	8.28e-05	0.0016
regulation of kinase activity (GO:0043549)	291	+	8.92e-05	0.00172
phagocytosis, engulfment (GO:0006911)	21	+	9.3e-05	0.00179
regulation of T cell migration (GO:2000404)	16	+	9.34e-05	0.0018
T cell mediated immunity (GO:0002456)	15	+	9.46e-05	0.00181
negative regulation of alpha-beta T cell activation (GO:0046636)	18	+	9.46e-05	0.00181
response to endogenous stimulus (GO:0009719)	451	+	9.48e-05	0.00181
negative regulation of toll-like receptor signaling pathway (GO:0034122)	15	+	9.53e-05	0.00182
regulation of protein kinase activity (GO:0045859)	261	+	9.62e-05	0.00183
regulation of response to wounding (GO:1903034)	62	+	9.65e-05	0.00184
regulation of interleukin-8 biosynthetic process (GO:0045414)	12	+	9.76e-05	0.00186
positive regulation of lymphocyte apoptotic process (GO:0070230)	8	+	9.99e-05	0.0019
positive regulation of transcription, DNA-templated (GO:0045893)	475	+	0.000101	0.00191
negative regulation of leukocyte apoptotic process (GO:2000107)	25	+	0.000103	0.00196
positive regulation of macrophage activation (GO:0043032)	11	+	0.000107	0.00203
negative regulation of DNA-binding transcription factor activity (GO:0043433)	57	+	0.000109	0.00204
positive T cell selection (GO:0043368)	10	+	0.000111	0.00208
response to ketone (GO:1901654)	71	+	0.000111	0.00208
regulation of tumor necrosis factor-mediated signaling pathway (GO:0010803)	16	+	0.000111	0.00209
positive regulation of granulocyte chemotaxis (GO:0071624)	10	+	0.000114	0.00212
positive regulation of neutrophil chemotaxis (GO:0090023)	10	+	0.000114	0.00212
positive regulation of peptidyl-serine phosphorylation of STAT protein (GO:0033141)	7	+	0.000114	0.00212
regulation of secretion (GO:0051046)	242	+	0.000115	0.00214
regulation of wound healing (GO:0061041)	49	+	0.000116	0.00214
regulation of alpha-beta T cell proliferation (GO:0046640)	10	+	0.000119	0.00221
regulation of localization (GO:0032879)	860	+	0.000119	0.00221
regulation of interleukin-1 beta secretion (GO:0050706)	16	+	0.000121	0.00224
regulation of chemokine biosynthetic process (GO:0045073)	11	+	0.000126	0.00231
cytokine secretion (GO:0050663)	23	+	0.000132	0.00241
viral process (GO:0016032)	212	+	0.000134	0.00245
regulation of epithelial cell apoptotic process (GO:1904035)	36	+	0.000134	0.00245
regulation of immunoglobulin mediated immune response (GO:0002889)	25	+	0.000135	0.00246
regulation of B cell mediated immunity (GO:0002712)	25	+	0.000135	0.00246
antigen processing and presentation of endogenous antigen (GO:0019883)	10	+	0.000138	0.00251
cell population proliferation (GO:0008283)	155	+	0.000146	0.00265
tissue remodeling (GO:0048771)	33	+	0.000148	0.00268
regulation of cytokine production involved in inflammatory response (GO:1900015)	16	+	0.000148	0.00268
negative regulation of developmental process (GO:0051093)	320	+	0.000149	0.0027
acute-phase response (GO:0006953)	14	+	0.00015	0.0027
regulation of mast cell activation (GO:0033003)	18	+	0.000152	0.00274
plasma membrane invagination (GO:0099024)	24	+	0.000153	0.00275
negative regulation of transferase activity (GO:0051348)	87	+	0.000153	0.00275
negative regulation of response to cytokine stimulus (GO:0060761)	18	+	0.000155	0.00279
cellular ion homeostasis (GO:0006873)	185	+	0.000158	0.00283
positive regulation of macrophage chemotaxis (GO:0010759)	9	+	0.000159	0.00284
regulation of hormone biosynthetic process (GO:0046885)	15	+	0.000169	0.00302
response to mechanical stimulus (GO:0009612)	79	+	0.000178	0.00317
intrinsic apoptotic signaling pathway in response to DNA damage (GO:0008630)	31	+	0.00018	0.00321
complement activation (GO:0006956)	13	+	0.000183	0.00325
regulation of lymphocyte chemotaxis (GO:1901623)	10	+	0.000189	0.00336
regulation of B cell differentiation (GO:0045577)	14	+	0.000193	0.00342
regulation of endothelial cell apoptotic process (GO:2000351)	22	+	0.000196	0.00347
cellular chemical homeostasis (GO:0055082)	209	+	0.000198	0.00349
positive regulation of RNA metabolic process (GO:0051254)	517	+	0.000199	0.00351
positive regulation of interleukin-1 beta secretion (GO:0050718)	11	+	0.000202	0.00354
positive regulation of interleukin-1 secretion (GO:0050716)	11	+	0.000202	0.00354
regulation of developmental process (GO:0050793)	848	+	0.000202	0.00355
negative regulation of T cell mediated immunity (GO:0002710)	8	+	0.000206	0.0036
response to extracellular stimulus (GO:0009991)	180	+	0.000211	0.00368
signal transduction by p53 class mediator (GO:0072331)	43	+	0.000213	0.00372
regulation of release of cytochrome c from mitochondria (GO:0090199)	17	+	0.000223	0.00389
regulation of tissue remodeling (GO:0034103)	32	+	0.000224	0.00389
regulation of biological quality (GO:0065008)	1151	+	0.000225	0.00391
regulation of transport (GO:0051049)	568	+	0.000228	0.00395
negative regulation of intracellular signal transduction (GO:1902532)	149	+	0.00023	0.00398
interleukin-2-mediated signaling pathway (GO:0038110)	10	+	0.000236	0.00409
regulation of multicellular organismal development (GO:2000026)	669	+	0.000237	0.0041
regulation of complement activation (GO:0030449)	14	+	0.000242	0.00417
negative regulation of cytokine-mediated signaling pathway (GO:0001960)	16	+	0.000249	0.0043
negative regulation of myeloid cell differentiation (GO:0045638)	37	+	0.00025	0.00431
cellular response to interferon-alpha (GO:0035457)	7	+	0.000254	0.00437
positive regulation of cytosolic calcium ion concentration (GO:0007204)	87	+	0.00026	0.00445
regulation of T-helper 1 type immune response (GO:0002825)	10	+	0.00026	0.00446
multi-organism cellular process (GO:0044764)	9	+	0.000268	0.00458
tissue development (GO:0009888)	443	+	0.000272	0.00465
inorganic ion homeostasis (GO:0098771)	211	+	0.000274	0.00467
antigen processing and presentation of endogenous peptide antigen (GO:0002483)	9	+	0.000276	0.0047
antigen processing and presentation of endogenous peptide antigen via MHC class I (GO:0019885)	9	+	0.000276	0.0047
positive regulation of neuron death (GO:1901216)	43	+	0.000278	0.00472
response to ethanol (GO:0045471)	39	+	0.000281	0.00477
positive regulation of interleukin-2 production (GO:0032743)	16	+	0.000283	0.0048
response to fluid shear stress (GO:0034405)	12	+	0.000286	0.00484
regulation of smooth muscle cell proliferation (GO:0048660)	65	+	0.000288	0.00486
regulation of interleukin-8 secretion (GO:2000482)	11	+	0.000289	0.00488
positive regulation of cell cycle arrest (GO:0071158)	26	+	0.000295	0.00497
regulation of mast cell activation involved in immune response (GO:0033006)	15	+	0.000296	0.00497
regulation of mast cell degranulation (GO:0043304)	15	+	0.000296	0.00496
membrane invagination (GO:0010324)	25	+	0.000296	0.00496
production of molecular mediator involved in inflammatory response (GO:0002532)	9	+	0.000298	0.00499
regulation of lipopolysaccharide-mediated signaling pathway (GO:0031664)	10	+	0.000304	0.00509
anatomical structure formation involved in morphogenesis (GO:0048646)	288	+	0.000308	0.00513
negative regulation of viral transcription (GO:0032897)	11	+	0.000311	0.00518
regulation of T cell cytokine production (GO:0002724)	12	+	0.000315	0.00525
positive regulation of RNA biosynthetic process (GO:1902680)	498	+	0.000318	0.00528
positive regulation of nucleic acid-templated transcription (GO:1903508)	498	+	0.000318	0.00528
regulation of neutrophil migration (GO:1902622)	15	+	0.00032	0.0053
positive regulation of interleukin-17 production (GO:0032740)	6	+	0.000327	0.0054
negative regulation of interleukin-10 production (GO:0032693)	8	+	0.000331	0.00545
interleukin-7-mediated signaling pathway (GO:0038111)	12	+	0.000332	0.00547
positive regulation of cell differentiation (GO:0045597)	351	+	0.000334	0.00548
T cell proliferation (GO:0042098)	11	+	0.000338	0.00554
cellular response to hydrogen peroxide (GO:0070301)	30	+	0.000338	0.00554
interferon-gamma production (GO:0032609)	9	+	0.000339	0.00555
granulocyte differentiation (GO:0030851)	11	+	0.000345	0.00563
cellular cation homeostasis (GO:0030003)	182	+	0.000346	0.00563
negative regulation of coagulation (GO:0050819)	17	+	0.000347	0.00563
positive regulation of interferon-beta production (GO:0032728)	22	+	0.000358	0.00579
cellular extravasation (GO:0045123)	21	+	0.000364	0.0059
regulation of syncytium formation by plasma membrane fusion (GO:0060142)	12	+	0.00037	0.00598
regulation of vitamin metabolic process (GO:0030656)	9	+	0.00037	0.00597
regulation of neutrophil chemotaxis (GO:0090022)	11	+	0.00039	0.00628
positive regulation of myeloid leukocyte mediated immunity (GO:0002888)	13	+	0.000391	0.0063
positive regulation of transcription by RNA polymerase II (GO:0045944)	368	+	0.000392	0.0063
regulation of microglial cell activation (GO:1903978)	11	+	0.000393	0.00632
positive regulation of intrinsic apoptotic signaling pathway (GO:2001244)	25	+	0.0004	0.0064
regulation of oxidoreductase activity (GO:0051341)	42	+	0.0004	0.0064
regulation of inflammatory response to antigenic stimulus (GO:0002861)	9	+	0.000401	0.00641
negative regulation of intrinsic apoptotic signaling pathway (GO:2001243)	27	+	0.000405	0.00647
regulation of type I interferon-mediated signaling pathway (GO:0060338)	13	+	0.000411	0.00655
positive regulation of cytokine production involved in inflammatory response (GO:1900017)	9	+	0.000417	0.00663
regulation of chronic inflammatory response (GO:0002676)	7	+	0.000418	0.00664
positive regulation of interleukin-4 production (GO:0032753)	9	+	0.000418	0.00664
regulation of interleukin-4 production (GO:0032673)	9	+	0.000418	0.00663
cellular response to virus (GO:0098586)	10	+	0.000419	0.00663
response to cadmium ion (GO:0046686)	20	+	0.000422	0.00668
natural killer cell mediated immunity (GO:0002228)	9	+	0.000424	0.00669
negative regulation of leukocyte mediated cytotoxicity (GO:0001911)	8	+	0.000434	0.00683
positive regulation of interleukin-8 biosynthetic process (GO:0045416)	10	+	0.000437	0.00687
regulation of myotube differentiation (GO:0010830)	19	+	0.000441	0.00693
negative regulation of T cell receptor signaling pathway (GO:0050860)	10	+	0.000444	0.00696
positive regulation of macrophage migration (GO:1905523)	17	+	0.000447	0.00701
chronic inflammatory response (GO:0002544)	7	+	0.000448	0.00701
toll-like receptor 4 signaling pathway (GO:0034142)	9	+	0.000454	0.0071
coagulation (GO:0050817)	81	+	0.000454	0.00709
hemostasis (GO:0007599)	81	+	0.000454	0.00709
blood coagulation (GO:0007596)	81	+	0.000454	0.00708
cellular response to organic cyclic compound (GO:0071407)	179	+	0.000456	0.0071
positive regulation of interleukin-8 secretion (GO:2000484)	9	+	0.000461	0.00716
cation homeostasis (GO:0055080)	209	+	0.000468	0.00726
positive regulation of hemostasis (GO:1900048)	11	+	0.000475	0.00735
positive regulation of blood coagulation (GO:0030194)	11	+	0.000475	0.00734
regulation of NIK/NF-kappaB signaling (GO:1901222)	45	+	0.000484	0.00746
positive regulation of chemokine biosynthetic process (GO:0045080)	10	+	0.000484	0.00746
positive regulation of oxidoreductase activity (GO:0051353)	21	+	0.000489	0.00753
positive regulation of T cell apoptotic process (GO:0070234)	5	+	0.000502	0.00772
negative regulation of interleukin-12 production (GO:0032695)	8	+	0.000504	0.00773
B cell receptor signaling pathway (GO:0050853)	19	+	0.000504	0.00772
cellular response to interleukin-15 (GO:0071350)	12	+	0.000504	0.00772
response to interleukin-15 (GO:0070672)	12	+	0.000504	0.00771
interleukin-15-mediated signaling pathway (GO:0035723)	12	+	0.000504	0.0077
regulation of MyD88-independent toll-like receptor signaling pathway (GO:0034127)	7	+	0.000522	0.00797
negative regulation of smooth muscle cell proliferation (GO:0048662)	22	+	0.000523	0.00796
positive regulation of interleukin-10 production (GO:0032733)	15	+	0.000524	0.00798
positive regulation of leukocyte mediated cytotoxicity (GO:0001912)	18	+	0.00053	0.00805
positive regulation of neuroinflammatory response (GO:0150078)	9	+	0.00053	0.00805
positive regulation of extrinsic apoptotic signaling pathway (GO:2001238)	23	+	0.000538	0.00815
positive regulation of interleukin-2 biosynthetic process (GO:0045086)	8	+	0.000546	0.00826
response to nutrient (GO:0007584)	82	+	0.000548	0.00828
response to peptidoglycan (GO:0032494)	9	+	0.000557	0.00842
negative regulation of antigen processing and presentation (GO:0002578)	6	+	0.000566	0.00853
response to muramyl dipeptide (GO:0032495)	9	+	0.00057	0.00858
ion homeostasis (GO:0050801)	232	+	0.000573	0.0086
negative regulation of cell differentiation (GO:0045596)	231	+	0.0006	0.00897
drug metabolic process (GO:0017144)	94	+	0.0006	0.00896
regulation of macrophage migration (GO:1905521)	26	+	0.000616	0.00917
positive regulation of lymphocyte migration (GO:2000403)	16	+	0.00062	0.00923
regulation of gliogenesis (GO:0014013)	48	+	0.000621	0.00922
metal ion homeostasis (GO:0055065)	187	+	0.000626	0.00929
regulation of T-helper 2 cell cytokine production (GO:2000551)	6	+	0.000636	0.00942
negative regulation of type 2 immune response (GO:0002829)	8	+	0.000642	0.00951
cellular response to topologically incorrect protein (GO:0035967)	50	+	0.000656	0.00969
positive regulation of steroid metabolic process (GO:0045940)	10	+	0.000663	0.00978
entry into host (GO:0044409)	33	+	0.000669	0.00986
viral entry into host cell (GO:0046718)	33	+	0.000669	0.00985
entry into host cell (GO:0030260)	33	+	0.000669	0.00983
negative regulation of hemostasis (GO:1900047)	15	+	0.000685	0.0101
negative regulation of blood coagulation (GO:0030195)	15	+	0.000685	0.0101
regulation of cell cycle arrest (GO:0071156)	35	+	0.000686	0.0101
regulation of dendritic cell cytokine production (GO:0002730)	8	+	0.000691	0.0101
regulation of T cell mediated cytotoxicity (GO:0001914)	13	+	0.000704	0.0103
positive regulation of antigen processing and presentation (GO:0002579)	8	+	0.000708	0.0103
macrophage differentiation (GO:0030225)	8	+	0.000716	0.0104
positive regulation of myotube differentiation (GO:0010831)	11	+	0.000716	0.0104
regulation of vitamin D biosynthetic process (GO:0060556)	7	+	0.000721	0.0105
response to vitamin D (GO:0033280)	16	+	0.000736	0.0107
natural killer cell activation involved in immune response (GO:0002323)	8	+	0.000737	0.0107
response to topologically incorrect protein (GO:0035966)	61	+	0.000759	0.011
positive regulation of nucleobase-containing compound metabolic process (GO:0045935)	560	+	0.000768	0.0111
positive regulation of hydrolase activity (GO:0051345)	261	+	0.000777	0.0112
cellular metal ion homeostasis (GO:0006875)	162	+	0.000779	0.0112
cellular response to cadmium ion (GO:0071276)	13	+	0.00078	0.0112
cellular response to interleukin-7 (GO:0098761)	15	+	0.000803	0.0115
response to interleukin-7 (GO:0098760)	15	+	0.000803	0.0115
regulation of myoblast fusion (GO:1901739)	10	+	0.000808	0.0116
regulation of blood vessel endothelial cell migration (GO:0043535)	41	+	0.00081	0.0116
interleukin-1 production (GO:0032612)	7	+	0.000819	0.0117
interleukin-1 beta production (GO:0032611)	7	+	0.000819	0.0117
superoxide metabolic process (GO:0006801)	8	+	0.000858	0.0122
response to estrogen (GO:0043627)	21	+	0.000861	0.0122
regulation of protein serine/threonine kinase activity (GO:0071900)	183	+	0.000886	0.0126
cellular response to unfolded protein (GO:0034620)	44	+	0.000896	0.0127
negative regulation of cell killing (GO:0031342)	9	+	0.000901	0.0128
negative regulation of myeloid leukocyte differentiation (GO:0002762)	25	+	0.000902	0.0128
regulation of macrophage differentiation (GO:0045649)	10	+	0.000912	0.0129
regulation of cytokine secretion involved in immune response (GO:0002739)	5	+	0.000923	0.013
positive regulation of monooxygenase activity (GO:0032770)	11	+	0.000931	0.0131
positive regulation of interferon-alpha production (GO:0032727)	16	+	0.000931	0.0131
positive regulation of T cell migration (GO:2000406)	13	+	0.000941	0.0132
regulation of natural killer cell chemotaxis (GO:2000501)	4	+	0.000943	0.0133
skeletal muscle tissue development (GO:0007519)	39	+	0.00095	0.0133
negative regulation of viral entry into host cell (GO:0046597)	8	+	0.000958	0.0134
hyaluronan metabolic process (GO:0030212)	11	+	0.000972	0.0136
response to endoplasmic reticulum stress (GO:0034976)	78	+	0.000978	0.0137
regulation of cytosolic calcium ion concentration (GO:0051480)	99	+	0.000997	0.0139
negative regulation of ossification (GO:0030279)	28	+	0.00101	0.0141
protein homooligomerization (GO:0051260)	88	+	0.00102	0.0143
intracellular pH reduction (GO:0051452)	15	+	0.00104	0.0145
pH reduction (GO:0045851)	15	+	0.00104	0.0144
regulation of monocyte chemotaxis (GO:0090025)	17	+	0.00104	0.0145
cellular divalent inorganic cation homeostasis (GO:0072503)	144	+	0.00105	0.0145
regulation of neuron death (GO:1901214)	115	+	0.00108	0.0149
response to unfolded protein (GO:0006986)	55	+	0.00108	0.015
regulation of ribonuclease activity (GO:0060700)	5	+	0.0011	0.0152
cellular response to interleukin-2 (GO:0071352)	11	+	0.0011	0.0152
response to interleukin-2 (GO:0070669)	11	+	0.0011	0.0152
Fc-epsilon receptor signaling pathway (GO:0038095)	41	+	0.00111	0.0153
vascular endothelial growth factor receptor signaling pathway (GO:0048010)	26	+	0.00113	0.0155
CD4-positive, alpha-beta T cell activation (GO:0035710)	20	+	0.00114	0.0156
positive regulation of natural killer cell mediated immunity (GO:0002717)	12	+	0.00114	0.0156
extracellular structure organization (GO:0043062)	111	+	0.00114	0.0156
extracellular matrix organization (GO:0030198)	111	+	0.00114	0.0156
detection of external biotic stimulus (GO:0098581)	7	+	0.00114	0.0156
detection of biotic stimulus (GO:0009595)	7	+	0.00114	0.0156
transport (GO:0006810)	1190	+	0.00115	0.0156
negative regulation of G1/S transition of mitotic cell cycle (GO:2000134)	40	+	0.00115	0.0156
negative regulation of cell cycle G1/S phase transition (GO:1902807)	40	+	0.00115	0.0156
regulation of T-helper cell differentiation (GO:0045622)	13	+	0.00115	0.0156
regulation of endothelial cell migration (GO:0010594)	72	+	0.00117	0.0159
epiboly involved in wound healing (GO:0090505)	8	+	0.00119	0.0162
epiboly (GO:0090504)	8	+	0.00119	0.0161
wound healing, spreading of cells (GO:0044319)	8	+	0.00119	0.0161
negative regulation of NF-kappaB transcription factor activity (GO:0032088)	33	+	0.0012	0.0162
positive chemotaxis (GO:0050918)	15	+	0.00121	0.0163
negative regulation of kinase activity (GO:0033673)	75	+	0.00122	0.0165
response to progesterone (GO:0032570)	19	+	0.00124	0.0167
production of molecular mediator of immune response (GO:0002440)	26	+	0.00124	0.0167
leukocyte migration involved in inflammatory response (GO:0002523)	9	+	0.00126	0.0169
negative regulation of protein kinase activity (GO:0006469)	72	+	0.00126	0.0169
establishment of localization (GO:0051234)	1230	+	0.00126	0.0169
negative regulation of phosphorylation (GO:0042326)	145	+	0.00127	0.017
cellular response to abiotic stimulus (GO:0071214)	96	+	0.00128	0.0171
cellular response to environmental stimulus (GO:0104004)	96	+	0.00128	0.0171
regulation of immunoglobulin secretion (GO:0051023)	8	+	0.00132	0.0176
DNA cytosine deamination (GO:0070383)	5	+	0.00133	0.0177
positive regulation of neutrophil migration (GO:1902624)	12	+	0.00133	0.0177
growth hormone receptor signaling pathway via JAK-STAT (GO:0060397)	7	+	0.00133	0.0177
endothelial cell migration (GO:0043542)	28	+	0.00135	0.0179
negative regulation of macrophage activation (GO:0043031)	10	+	0.00136	0.018
T cell homeostasis (GO:0043029)	14	+	0.00138	0.0183
regulation of macrophage chemotaxis (GO:0010758)	16	+	0.0014	0.0185
regulation of calcidiol 1-monooxygenase activity (GO:0060558)	6	+	0.00142	0.0188
regulation of protein localization to nucleus (GO:1900180)	43	+	0.00142	0.0188
negative regulation of humoral immune response (GO:0002921)	4	+	0.00144	0.019
skeletal muscle organ development (GO:0060538)	40	+	0.00144	0.019
protein complex oligomerization (GO:0051259)	123	+	0.00145	0.0191
fibrinolysis (GO:0042730)	6	+	0.00145	0.0191
macrophage activation involved in immune response (GO:0002281)	7	+	0.00146	0.0192
regulation of metal ion transport (GO:0010959)	137	+	0.00147	0.0193
positive regulation of release of cytochrome c from mitochondria (GO:0090200)	12	+	0.00147	0.0193
natural killer cell mediated cytotoxicity (GO:0042267)	8	+	0.00148	0.0193
mast cell activation (GO:0045576)	8	+	0.00148	0.0194
negative regulation of cell cycle (GO:0045786)	184	+	0.00152	0.0198
innate immune response activating cell surface receptor signaling pathway (GO:0002220)	37	+	0.00152	0.0198
DNA damage response, signal transduction by p53 class mediator resulting in cell cycle arrest (GO:0006977)	21	+	0.00152	0.0198
positive regulation of mononuclear cell migration (GO:0071677)	16	+	0.00154	0.0201
regulation of single stranded viral RNA replication via double stranded DNA intermediate (GO:0045091)	9	+	0.00155	0.0202
T cell differentiation involved in immune response (GO:0002292)	17	+	0.00155	0.0202
positive regulation of coagulation (GO:0050820)	12	+	0.00156	0.0202
antibacterial humoral response (GO:0019731)	10	+	0.00156	0.0202
negative regulation of interleukin-6 production (GO:0032715)	16	+	0.00157	0.0203
pyridine nucleotide biosynthetic process (GO:0019363)	9	+	0.00157	0.0204
pyridine nucleotide metabolic process (GO:0019362)	9	+	0.00157	0.0203
nicotinamide nucleotide biosynthetic process (GO:0019359)	9	+	0.00157	0.0203
nicotinamide nucleotide metabolic process (GO:0046496)	9	+	0.00157	0.0203
positive regulation of transcription regulatory region DNA binding (GO:2000679)	10	+	0.00158	0.0204
protein kinase B signaling (GO:0043491)	15	+	0.00159	0.0205
positive regulation of type I interferon-mediated signaling pathway (GO:0060340)	5	+	0.00159	0.0204
regulation of endothelial cell differentiation (GO:0045601)	10	+	0.0016	0.0205
negative regulation of protein phosphorylation (GO:0001933)	135	+	0.00162	0.0208
interaction with symbiont (GO:0051702)	22	+	0.00163	0.0209
aminoglycan catabolic process (GO:0006026)	19	+	0.00166	0.0213
positive regulation of smooth muscle cell proliferation (GO:0048661)	43	+	0.00167	0.0214
positive regulation of endothelial cell apoptotic process (GO:2000353)	10	+	0.0017	0.0218
positive regulation of immunoglobulin production (GO:0002639)	21	+	0.00173	0.0221
intrinsic apoptotic signaling pathway in response to endoplasmic reticulum stress (GO:0070059)	17	+	0.00175	0.0223
positive regulation of protein complex assembly (GO:0031334)	73	+	0.00177	0.0226
respiratory burst (GO:0045730)	4	+	0.00179	0.0228
localization (GO:0051179)	1556	+	0.0018	0.0228
negative regulation of mitotic cell cycle (GO:0045930)	102	+	0.0018	0.0228
regulation of monooxygenase activity (GO:0032768)	25	+	0.00182	0.023
regulation of endothelial cell proliferation (GO:0001936)	49	+	0.00184	0.0233
regulation of mRNA catabolic process (GO:0061013)	55	+	0.00186	0.0234
positive regulation of myeloid leukocyte cytokine production involved in immune response (GO:0061081)	10	+	0.00187	0.0236
positive regulation of gliogenesis (GO:0014015)	33	+	0.00187	0.0235
T cell chemotaxis (GO:0010818)	8	+	0.00188	0.0237
DNA damage response, signal transduction by p53 class mediator (GO:0030330)	31	+	0.00189	0.0237
carbohydrate derivative catabolic process (GO:1901136)	61	+	0.0019	0.0239
positive regulation of interleukin-6 secretion (GO:2000778)	17	+	0.0019	0.0239
positive regulation of interleukin-12 biosynthetic process (GO:0045084)	6	+	0.00191	0.0239
regulation of cellular response to stress (GO:0080135)	237	+	0.00191	0.0239
CD4-positive, alpha-beta T cell differentiation (GO:0043367)	17	+	0.00192	0.024
gland development (GO:0048732)	130	+	0.00192	0.024
regulation of G1/S transition of mitotic cell cycle (GO:2000045)	60	+	0.00197	0.0246
positive regulation of protein localization to nucleus (GO:1900182)	31	+	0.00197	0.0246
intracellular receptor signaling pathway (GO:0030522)	74	+	0.00197	0.0245
type 2 immune response (GO:0042092)	5	+	0.00198	0.0246
pyridine-containing compound biosynthetic process (GO:0072525)	10	+	0.00199	0.0247
pyridine-containing compound metabolic process (GO:0072524)	10	+	0.00199	0.0247
response to nutrient levels (GO:0031667)	166	+	0.00199	0.0246
regulation of erythrocyte differentiation (GO:0045646)	16	+	0.002	0.0247
necroptotic signaling pathway (GO:0097527)	4	+	0.00201	0.0249
negative regulation of natural killer cell mediated cytotoxicity (GO:0045953)	5	+	0.00202	0.025
negative regulation of natural killer cell mediated immunity (GO:0002716)	5	+	0.00202	0.025
regulation of toll-like receptor 4 signaling pathway (GO:0034143)	8	+	0.00204	0.0252
endoplasmic reticulum unfolded protein response (GO:0030968)	32	+	0.00209	0.0257
positive regulation of dendritic cell antigen processing and presentation (GO:0002606)	6	+	0.00209	0.0257
receptor-mediated endocytosis (GO:0006898)	63	+	0.0021	0.0257
skeletal muscle cell differentiation (GO:0035914)	18	+	0.0021	0.0258
response to hormone (GO:0009725)	269	+	0.00213	0.0261
positive regulation of mast cell activation (GO:0033005)	8	+	0.00213	0.0261
positive regulation of calcium ion transport (GO:0051928)	44	+	0.00213	0.0261
germinal center formation (GO:0002467)	6	+	0.00215	0.0263
regulation of interferon-gamma biosynthetic process (GO:0045072)	7	+	0.00216	0.0263
negative regulation of MyD88-independent toll-like receptor signaling pathway (GO:0034128)	6	+	0.00219	0.0267
positive regulation of heterotypic cell-cell adhesion (GO:0034116)	6	+	0.00219	0.0267
positive regulation of T cell receptor signaling pathway (GO:0050862)	8	+	0.0022	0.0267
dendritic cell differentiation (GO:0097028)	13	+	0.00222	0.027
regulation of MHC class II biosynthetic process (GO:0045346)	8	+	0.00223	0.027
intrinsic apoptotic signaling pathway by p53 class mediator (GO:0072332)	21	+	0.00224	0.0271
regulation of osteoclast differentiation (GO:0045670)	29	+	0.00225	0.0273
immune response-inhibiting signal transduction (GO:0002765)	4	+	0.00227	0.0274
oxidoreduction coenzyme metabolic process (GO:0006733)	12	+	0.0023	0.0278
cellular calcium ion homeostasis (GO:0006874)	135	+	0.0023	0.0278
tolerance induction (GO:0002507)	6	+	0.00233	0.0282
chemical homeostasis (GO:0048878)	309	+	0.00234	0.0282
positive regulation of leukocyte degranulation (GO:0043302)	9	+	0.00235	0.0283
glycosyl compound catabolic process (GO:1901658)	15	+	0.00238	0.0286
integrin-mediated signaling pathway (GO:0007229)	40	+	0.00239	0.0288
regulation of respiratory burst (GO:0060263)	7	+	0.00242	0.029
complement receptor mediated signaling pathway (GO:0002430)	7	+	0.00242	0.029
negative regulation of mitotic cell cycle phase transition (GO:1901991)	72	+	0.00245	0.0294
positive regulation of protein polyubiquitination (GO:1902916)	5	+	0.00246	0.0294
positive regulation of humoral immune response (GO:0002922)	8	+	0.00251	0.0299
regulation of peptidyl-serine phosphorylation of STAT protein (GO:0033139)	10	+	0.00252	0.0301
leukocyte apoptotic process (GO:0071887)	12	+	0.00254	0.0303
response to temperature stimulus (GO:0009266)	52	+	0.00254	0.0302
regulation of biological process (GO:0050789)	2921	+	0.00256	0.0304
regulation of cell differentiation (GO:0045595)	573	+	0.00257	0.0305
regulation of DNA damage response, signal transduction by p53 class mediator (GO:0043516)	11	+	0.00259	0.0306
regulation of interferon-gamma-mediated signaling pathway (GO:0060334)	15	+	0.0026	0.0307
regulation of response to interferon-gamma (GO:0060330)	15	+	0.0026	0.0307
response to estradiol (GO:0032355)	44	+	0.0026	0.0307
regulation of necrotic cell death (GO:0010939)	10	+	0.00261	0.0307
regulation of protein kinase B signaling (GO:0051896)	80	+	0.00261	0.0307
regulation of interferon-beta biosynthetic process (GO:0045357)	7	+	0.00262	0.0308
cytokine production involved in immune response (GO:0002367)	7	+	0.00265	0.0311
DNA deamination (GO:0045006)	6	+	0.00267	0.0313
negative regulation of interferon-gamma production (GO:0032689)	11	+	0.0027	0.0316
positive regulation of killing of cells of other organism (GO:0051712)	5	+	0.0027	0.0315
regulation of killing of cells of other organism (GO:0051709)	5	+	0.0027	0.0315
negative regulation of interleukin-8 production (GO:0032717)	8	+	0.0027	0.0315
thymic T cell selection (GO:0045061)	7	+	0.0027	0.0315
regulation of interleukin-12 biosynthetic process (GO:0045075)	7	+	0.00271	0.0315
negative regulation of cell cycle phase transition (GO:1901988)	77	+	0.00274	0.0318
regulation of anatomical structure morphogenesis (GO:0022603)	404	+	0.00274	0.0318
negative regulation of transcription by RNA polymerase II (GO:0000122)	256	+	0.00278	0.0323
regulation of gamma-delta T cell activation (GO:0046643)	6	+	0.0028	0.0325
regulation of superoxide metabolic process (GO:0090322)	16	+	0.00281	0.0325
regulation of granulocyte differentiation (GO:0030852)	7	+	0.00283	0.0328
NAD biosynthetic process (GO:0009435)	8	+	0.00284	0.0328
regulation of binding (GO:0051098)	123	+	0.00288	0.0332
response to acid chemical (GO:0001101)	115	+	0.00288	0.0332
T cell lineage commitment (GO:0002360)	8	+	0.00292	0.0336
response to vitamin (GO:0033273)	39	+	0.00297	0.0341
positive regulation of epithelial to mesenchymal transition (GO:0010718)	20	+	0.00299	0.0342
cellular response to lipoteichoic acid (GO:0071223)	6	+	0.00301	0.0345
response to lipoteichoic acid (GO:0070391)	6	+	0.00301	0.0344
response to growth factor (GO:0070848)	170	+	0.00302	0.0345
positive regulation of natural killer cell mediated cytotoxicity (GO:0045954)	11	+	0.00303	0.0346
positive regulation of hormone metabolic process (GO:0032352)	9	+	0.00304	0.0346
negative regulation of regulatory T cell differentiation (GO:0045590)	4	+	0.00305	0.0348
mature B cell differentiation (GO:0002335)	13	+	0.00307	0.035
positive regulation of acute inflammatory response (GO:0002675)	13	+	0.00308	0.035
alpha-beta T cell lineage commitment (GO:0002363)	4	+	0.00308	0.035
T-helper cell lineage commitment (GO:0002295)	4	+	0.00308	0.035
CD4-positive, alpha-beta T cell lineage commitment (GO:0043373)	4	+	0.00308	0.035
apoptotic process involved in morphogenesis (GO:0060561)	5	+	0.00312	0.0354
bone resorption (GO:0045453)	5	+	0.00316	0.0357
G protein-coupled receptor signaling pathway (GO:0007186)	213	+	0.00326	0.0368
signal transduction involved in mitotic G1 DNA damage checkpoint (GO:0072431)	22	+	0.00326	0.0368
signal transduction involved in mitotic cell cycle checkpoint (GO:0072413)	22	+	0.00326	0.0368
signal transduction involved in mitotic DNA integrity checkpoint (GO:1902403)	22	+	0.00326	0.0368
signal transduction involved in mitotic DNA damage checkpoint (GO:1902402)	22	+	0.00326	0.0367
intracellular signal transduction involved in G1 DNA damage checkpoint (GO:1902400)	22	+	0.00326	0.0367
positive regulation of macrophage differentiation (GO:0045651)	8	+	0.0033	0.0371
T cell differentiation in thymus (GO:0033077)	14	+	0.00334	0.0375
regulation of humoral immune response mediated by circulating immunoglobulin (GO:0002923)	5	+	0.00336	0.0376
T-helper 1 type immune response (GO:0042088)	9	+	0.0034	0.038
positive regulation of blood vessel endothelial cell migration (GO:0043536)	29	+	0.00341	0.0381
regulation of interferon-alpha biosynthetic process (GO:0045354)	6	+	0.00344	0.0384
calcium ion homeostasis (GO:0055074)	138	+	0.00349	0.0389
positive regulation of NMDA glutamate receptor activity (GO:1904783)	5	+	0.00349	0.0388
positive regulation of vascular smooth muscle cell proliferation (GO:1904707)	18	+	0.0035	0.0389
negative regulation of angiogenesis (GO:0016525)	44	+	0.00352	0.0391
dendritic cell chemotaxis (GO:0002407)	8	+	0.00352	0.0391
dendritic cell migration (GO:0036336)	8	+	0.00352	0.039
divalent inorganic cation homeostasis (GO:0072507)	151	+	0.00364	0.0403
superoxide anion generation (GO:0042554)	4	+	0.00366	0.0405
cellular response to exogenous dsRNA (GO:0071360)	11	+	0.00366	0.0405
activation of MAPK activity (GO:0000187)	65	+	0.00367	0.0405
response to amyloid-beta (GO:1904645)	24	+	0.00369	0.0407
positive regulation of MHC class II biosynthetic process (GO:0045348)	6	+	0.0037	0.0408
heterocycle biosynthetic process (GO:0018130)	322	+	0.0037	0.0408
biological regulation (GO:0065007)	3046	+	0.00372	0.0409
CD4-positive or CD8-positive, alpha-beta T cell lineage commitment (GO:0043369)	5	+	0.00374	0.0411
positive regulation of regulatory T cell differentiation (GO:0045591)	7	+	0.00375	0.0411
positive regulation of response to wounding (GO:1903036)	26	+	0.00375	0.0412
positive regulation of cell-substrate adhesion (GO:0010811)	49	+	0.00376	0.0412
regulation of platelet activation (GO:0010543)	15	+	0.0038	0.0416
positive regulation of T-helper cell differentiation (GO:0045624)	7	+	0.0038	0.0415
positive regulation of monocyte chemotaxis (GO:0090026)	13	+	0.0038	0.0415
release of cytochrome c from mitochondria (GO:0001836)	10	+	0.0038	0.0415
negative regulation of alpha-beta T cell differentiation (GO:0046639)	14	+	0.0038	0.0415
interleukin-9-mediated signaling pathway (GO:0038113)	7	+	0.00381	0.0415
cellular response to interleukin-9 (GO:0071355)	7	+	0.00381	0.0414
response to interleukin-9 (GO:0071104)	7	+	0.00381	0.0414
positive regulation of tolerance induction (GO:0002645)	3	+	0.00386	0.042
negative regulation of biomineralization (GO:0110150)	8	+	0.00388	0.0421
negative regulation of biomineral tissue development (GO:0070168)	8	+	0.00388	0.0421
negative regulation of CD4-positive, alpha-beta T cell activation (GO:2000515)	14	+	0.0039	0.0422
negative regulation of leukocyte degranulation (GO:0043301)	6	+	0.00392	0.0423
regulation of tumor necrosis factor biosynthetic process (GO:0042534)	20	+	0.00392	0.0423
detection of other organism (GO:0098543)	5	+	0.00394	0.0425
toll-like receptor 3 signaling pathway (GO:0034138)	6	+	0.00397	0.0429
positive regulation of syncytium formation by plasma membrane fusion (GO:0060143)	10	+	0.00398	0.0429
endocytosis (GO:0006897)	136	+	0.00399	0.043
cellular response to dsRNA (GO:0071359)	12	+	0.00401	0.0431
interleukin-21-mediated signaling pathway (GO:0038114)	6	+	0.00401	0.0431
cellular response to interleukin-21 (GO:0098757)	6	+	0.00401	0.0431
response to interleukin-21 (GO:0098756)	6	+	0.00401	0.043
negative regulation of interleukin-2 biosynthetic process (GO:0045085)	4	+	0.00406	0.0435
negative regulation of blood vessel morphogenesis (GO:2000181)	45	+	0.00408	0.0437
interaction with host (GO:0051701)	53	+	0.00412	0.0441
regulation of cellular response to macrophage colony-stimulating factor stimulus (GO:1903972)	4	+	0.00413	0.0442
regulation of response to macrophage colony-stimulating factor (GO:1903969)	4	+	0.00413	0.0441
activation of protein kinase activity (GO:0032147)	122	+	0.00418	0.0446
response to steroid hormone (GO:0048545)	102	+	0.00421	0.0449
amino sugar catabolic process (GO:0046348)	9	+	0.00426	0.0454
negative regulation of CD8-positive, alpha-beta T cell activation (GO:2001186)	4	+	0.00428	0.0456
myeloid cell homeostasis (GO:0002262)	36	+	0.00429	0.0456
positive regulation of T-helper 1 type immune response (GO:0002827)	7	+	0.00429	0.0456
toll-like receptor 9 signaling pathway (GO:0034162)	10	+	0.00431	0.0458
positive regulation of protein kinase B signaling (GO:0051897)	64	+	0.00437	0.0463
cellular response to endogenous stimulus (GO:0071495)	364	+	0.00438	0.0464
biomineralization (GO:0110148)	21	+	0.00438	0.0464
biomineral tissue development (GO:0031214)	21	+	0.00438	0.0464
cellular response to extracellular stimulus (GO:0031668)	107	+	0.0044	0.0465
interferon-gamma secretion (GO:0072643)	5	+	0.00445	0.047
Fc-gamma receptor signaling pathway (GO:0038094)	26	+	0.00456	0.0481
regulation of collagen metabolic process (GO:0010712)	13	+	0.00458	0.0483
regulation of interleukin-10 secretion (GO:2001179)	3	+	0.00462	0.0486
negative regulation of biosynthetic process (GO:0009890)	453	+	0.00463	0.0487
cytidine to uridine editing (GO:0016554)	7	+	0.00465	0.0488
base conversion or substitution editing (GO:0016553)	7	+	0.00465	0.0488
humoral immune response mediated by circulating immunoglobulin (GO:0002455)	10	+	0.00466	0.0489
negative regulation of cytokine secretion involved in immune response (GO:0002740)	3	+	0.00467	0.0489
cellular response to oxygen levels (GO:0071453)	70	+	0.00467	0.0488
cytoplasmic pattern recognition receptor signaling pathway (GO:0002753)	21	+	0.00467	0.0488
MyD88-dependent toll-like receptor signaling pathway (GO:0002755)	16	+	0.00468	0.0488
regulation of vascular smooth muscle cell proliferation (GO:1904705)	24	+	0.00468	0.0488
regulation of growth (GO:0040008)	209	+	0.00469	0.0489
alpha-beta T cell differentiation involved in immune response (GO:0002293)	15	+	0.00469	0.0489
alpha-beta T cell activation involved in immune response (GO:0002287)	15	+	0.00469	0.0488
positive regulation of B cell differentiation (GO:0045579)	7	+	0.00471	0.0489
negative regulation of phosphorus metabolic process (GO:0010563)	178	+	0.00472	0.049
negative regulation of phosphate metabolic process (GO:0045936)	178	+	0.00472	0.049
negative regulation of lipid biosynthetic process (GO:0051055)	14	+	0.00474	0.0492
ribonucleoside catabolic process (GO:0042454)	10	+	0.00479	0.0495
regulation of natural killer cell activation (GO:0032814)	15	+	0.00481	0.0496
negative regulation of lipid localization (GO:1905953)	16	+	0.00484	0.0499
cell-substrate adhesion (GO:0031589)	56	+	0.00484	0.0499
CD8-positive, alpha-beta T cell activation (GO:0036037)	5	+	0.00485	0.0499
cilium organization (GO:0044782)	105	-	3.47e-12	2.46e-10
cilium assembly (GO:0060271)	98	-	1.38e-11	9.12e-10
cell projection organization (GO:0030030)	365	-	6.23e-10	3.36e-08
plasma membrane bounded cell projection organization (GO:0120036)	353	-	1.09e-09	5.74e-08
microtubule-based process (GO:0007017)	201	-	1.81e-09	9.11e-08
plasma membrane bounded cell projection assembly (GO:0120031)	127	-	2.25e-09	1.1e-07
microtubule-based movement (GO:0007018)	86	-	3.04e-09	1.47e-07
cell projection assembly (GO:0030031)	130	-	3.37e-09	1.61e-07
microtubule-based transport (GO:0099111)	66	-	4.41e-08	1.78e-06
protein-containing complex localization (GO:0031503)	86	-	1.57e-07	5.76e-06
protein transport along microtubule (GO:0098840)	32	-	5.79e-07	1.87e-05
microtubule-based protein transport (GO:0099118)	32	-	5.79e-07	1.87e-05
intraciliary transport (GO:0042073)	24	-	6.02e-07	1.93e-05
nervous system development (GO:0007399)	674	-	1.82e-06	5.23e-05
transport along microtubule (GO:0010970)	56	-	2.84e-06	7.73e-05
cytoskeleton-dependent intracellular transport (GO:0030705)	66	-	6.96e-06	0.00017
organelle assembly (GO:0070925)	196	-	8.57e-06	0.000206
intraciliary transport involved in cilium assembly (GO:0035735)	19	-	1.51e-05	0.000351
axoneme assembly (GO:0035082)	19	-	2.02e-05	0.000458
neuron projection morphogenesis (GO:0048812)	157	-	3.14e-05	0.000669
cilium movement (GO:0003341)	17	-	3.16e-05	0.000672
neuron differentiation (GO:0030182)	301	-	4.03e-05	0.00084
microtubule cytoskeleton organization (GO:0000226)	139	-	5.02e-05	0.00103
plasma membrane bounded cell projection morphogenesis (GO:0120039)	158	-	5.07e-05	0.00104
neuron development (GO:0048666)	255	-	6.32e-05	0.00126
cell projection morphogenesis (GO:0048858)	159	-	7.65e-05	0.00149
neuron projection development (GO:0031175)	219	-	0.000108	0.00204
cilium-dependent cell motility (GO:0060285)	20	-	0.000112	0.0021
cilium or flagellum-dependent cell motility (GO:0001539)	20	-	0.000112	0.0021
action potential (GO:0001508)	28	-	0.000124	0.00228
trans-synaptic signaling (GO:0099537)	122	-	0.000125	0.00231
microtubule bundle formation (GO:0001578)	25	-	0.000161	0.00287
cell part morphogenesis (GO:0032990)	167	-	0.000174	0.00311
synaptic signaling (GO:0099536)	130	-	0.000305	0.0051
Unclassified (UNCLASSIFIED)	273	-	0.000323	0.00534
multicellular organismal signaling (GO:0035637)	38	-	0.000328	0.00541
chemical synaptic transmission (GO:0007268)	113	-	0.000344	0.00561
anterograde trans-synaptic signaling (GO:0098916)	113	-	0.000344	0.00561
homophilic cell adhesion via plasma membrane adhesion molecules (GO:0007156)	40	-	0.000355	0.00576
generation of neurons (GO:0048699)	471	-	0.000427	0.00673
calcium-ion regulated exocytosis (GO:0017156)	12	-	0.000457	0.0071
neurogenesis (GO:0022008)	498	-	0.00057	0.00858
ensheathment of neurons (GO:0007272)	36	-	0.000587	0.0088
myelination (GO:0042552)	36	-	0.000587	0.00879
axon ensheathment (GO:0008366)	36	-	0.000587	0.00878
neural retina development (GO:0003407)	19	-	0.00061	0.00909
retina morphogenesis in camera-type eye (GO:0060042)	19	-	0.000703	0.0103
receptor localization to synapse (GO:0097120)	17	-	0.00072	0.0105
organelle organization (GO:0006996)	896	-	0.00081	0.0116
cell morphogenesis involved in neuron differentiation (GO:0048667)	134	-	0.000812	0.0116
non-motile cilium assembly (GO:1905515)	17	-	0.00117	0.0159
RNA splicing (GO:0008380)	109	-	0.00173	0.0221
axonogenesis (GO:0007409)	119	-	0.00181	0.0229
microtubule anchoring (GO:0034453)	6	-	0.00191	0.0239
adult behavior (GO:0030534)	39	-	0.00202	0.025
sperm motility (GO:0097722)	14	-	0.00247	0.0295
flagellated sperm motility (GO:0030317)	14	-	0.00247	0.0295
protein localization to synapse (GO:0035418)	20	-	0.00247	0.0295
extracellular transport (GO:0006858)	10	-	0.00257	0.0305
epithelial cilium movement involved in extracellular fluid movement (GO:0003351)	10	-	0.00257	0.0305
sensory perception of mechanical stimulus (GO:0050954)	41	-	0.00258	0.0305
transmission of nerve impulse (GO:0019226)	15	-	0.00265	0.0311
cell-cell adhesion mediated by cadherin (GO:0044331)	10	-	0.00287	0.0332
axonemal dynein complex assembly (GO:0070286)	7	-	0.00289	0.0333
regulation of dendrite development (GO:0050773)	53	-	0.00291	0.0335
calcium ion-regulated exocytosis of neurotransmitter (GO:0048791)	8	-	0.00298	0.0342
nervous system process (GO:0050877)	227	-	0.00298	0.0342
sensory perception of sound (GO:0007605)	35	-	0.00315	0.0357
motile cilium assembly (GO:0044458)	7	-	0.00332	0.0373
central nervous system development (GO:0007417)	275	-	0.00338	0.0378
brain development (GO:0007420)	208	-	0.00348	0.0388
cytoskeleton organization (GO:0007010)	325	-	0.00355	0.0393
mRNA processing (GO:0006397)	123	-	0.00389	0.0422
axon development (GO:0061564)	132	-	0.00464	0.0488
smoothened signaling pathway (GO:0007224)	21	-	0.00466	0.0489
neurotransmitter secretion (GO:0007269)	30	-	0.00477	0.0494
signal release from synapse (GO:0099643)	30	-	0.00477	0.0493
ciliary basal body-plasma membrane docking (GO:0097711)	27	-	0.0048	0.0496
