# Supplementary material for: Virus infection of the CNS disrupts the immune-neural-synaptic axis via induction of pleiotropic gene regulation of host responses
Source: eLife. 2021 Feb 18;10:e62273. doi: 10.7554/eLife.62273 (PMC7891934; doi:10.7554/eLife.62273)
Supplement: Supplementary file 2. [file elife-62273-supp2.xlsx]

## Sheet: 30 Synaptic genes_CB_7dpi
All differentially regulated synaptic genes (30)			Upregulated synaptic genes (24)	Downregulated synaptic genes (6)
AGRN	Agrin;AGRN;ortholog		AGRN	CNTN1
C1QA	Complement C1q subcomponent subunit A;C1QA;ortholog		C1QA	GABRA2
C1QC	Complement C1q subcomponent subunit C;C1QC;ortholog		C1QC	PRSS12
CNTN1	Contactin-1;CNTN1;ortholog		DES	SEPTIN-6
DES	Desmin;DES;ortholog		DTNA	SOS1
DTNA	Dystrobrevin alpha;DTNA;ortholog		EIF4EBP2	ZNF804A
EIF4EBP2	Eukaryotic translation initiation factor 4E-binding protein 2;EIF4EBP2;ortholog		ELAVL1
ELAVL1	ELAV-like protein 1;ELAVL1;ortholog		FABP5
FABP5	Fatty acid-binding protein 5;FABP5;ortholog		FCGR2B
FCGR2B	Low affinity immunoglobulin gamma Fc region receptor II-b;FCGR2B;ortholog		GLS
GABRA2	Gamma-aminobutyric acid receptor subunit alpha-2;GABRA2;ortholog		GNB1
GLS	Glutaminase kidney isoform, mitochondrial;GLS;ortholog		ITGA5
GNB1	Guanine nucleotide-binding protein G(I)/G(S)/G(T) subunit beta-1;GNB1;ortholog		KCNMB1
ITGA5	Integrin alpha-5;ITGA5;ortholog		MX1
KCNMB1	Calcium-activated potassium channel subunit beta-1;KCNMB1;ortholog		MX2
MX1	Interferon-induced GTP-binding protein Mx1;MX1;ortholog		MYD88
MX2	Interferon-induced GTP-binding protein Mx2;MX2;ortholog		RPH3A
MYD88	Myeloid differentiation primary response protein MyD88;MYD88;ortholog		SLC12A7
PRSS12	Neurotrypsin;PRSS12;ortholog		SLC16A3
RPH3A	Rabphilin-3A;RPH3A;ortholog		SRGN
SEPTIN-6	Septin-6;SEPT6;ortholog		STAT3
SLC12A7	Solute carrier family 12 member 7;SLC12A7;ortholog		STX11
SLC16A3	Monocarboxylate transporter 4;SLC16A3;ortholog		SYNGR2
SOS1	Son of sevenless homolog 1;SOS1;ortholog		ZBP1
SRGN	Serglycin;SRGN;ortholog
STAT3	Signal transducer and activator of transcription 3;STAT3;ortholog
STX11	Syntaxin-11;STX11;ortholog
SYNGR2	Synaptogyrin-2;SYNGR2;ortholog
ZBP1	Insulin-like growth factor 2 mRNA-binding protein 1;IGF2BP1;ortholog
ZNF804A	Zinc finger protein 804A;ZNF804A;ortholog

## Sheet: 146_Synaptic genes_CB_9dpi
All differentially regulated synaptic genes (146)			Upregulated synaptic genes (67)	Downregulated synaptic genes (79)
ACTN2	Alpha-actinin-2;ACTN2;ortholog		ADCYAP1	ACTN2
ADAM22	Disintegrin and metalloproteinase domain-containing protein 22;ADAM22;ortholog		ADORA2A	ADAM22
ADCYAP1	Pituitary adenylate cyclase-activating polypeptide;ADCYAP1;ortholog		ADORA2B	APC2
ADORA2A	Adenosine receptor A2a;ADORA2A;ortholog		AGRN	BAI3
ADORA2B	Adenosine receptor A2b;ADORA2B;ortholog		ANXA1	CADM2
AGRN	Agrin;AGRN;ortholog		APOE	CALB1
ANXA1	Annexin A1;ANXA1;ortholog		ARHGDIA	CAMK2G
APC2	Adenomatous polyposis coli protein 2;APC2;ortholog		ARPC2	CNKSR2
APOE	Apolipoprotein E;APOE;ortholog		BCL2L1	CNTN1
ARHGDIA	Rho GDP-dissociation inhibitor 1;ARHGDIA;ortholog		C1QA	CNTN6
ARPC2	Actin-related protein 2/3 complex subunit 2;ARPC2;ortholog		C1QC	CNTNAP4
BAI3	Adhesion G protein-coupled receptor B3;ADGRB3;ortholog		CANX	COL4A5
BCL2L1	Bcl-2-like protein 1;BCL2L1;ortholog		CD3E	DGKI
C1QA	Complement C1q subcomponent subunit A;C1QA;ortholog		CHRNA5	DOC2A
C1QC	Complement C1q subcomponent subunit C;C1QC;ortholog		CLN8	EFNA5
CADM2	Cell adhesion molecule 2;CADM2;ortholog		CORO1A	ENAH
CALB1	Calbindin;CALB1;ortholog		CYFIP1	FAM107A
CAMK2G	Calcium/calmodulin-dependent protein kinase type II subunit gamma;CAMK2G;ortholog		DES	FARP1
CANX	Calnexin;CANX;ortholog		DPYSL3	FGF12
CD3E	T-cell surface glycoprotein CD3 epsilon chain;CD3E;ortholog		DTNA	FRMPD4
CHRNA5	Neuronal acetylcholine receptor subunit alpha-5;CHRNA5;ortholog		EGR3	GABRA2
CLN8	Protein CLN8;CLN8;ortholog		EIF4EBP1	GABRB1
CNKSR2	Connector enhancer of kinase suppressor of ras 2;CNKSR2;ortholog		EIF4EBP2	GABRG1
CNTN1	Contactin-1;CNTN1;ortholog		FCGR2B	GNRH1
CNTN6	Contactin-6;CNTN6;ortholog		FLNA	GRIA1
CNTNAP4	Contactin-associated protein-like 4;CNTNAP4;ortholog		GABBR1	GRIA3
COL4A5	Collagen alpha-5(IV) chain;COL4A5;ortholog		GLS	GRIK1
CORO1A	Coronin-1A;CORO1A;ortholog		GLUL	GRM3
CYFIP1	Cytoplasmic FMR1-interacting protein 1;CYFIP1;ortholog		GNB1	GRM5
DES	Desmin;DES;ortholog		GRASP	HTR1E
DGKI	Diacylglycerol kinase iota;DGKI;ortholog		IL1RAP	ITPR1
DOC2A	Double C2-like domain-containing protein alpha;DOC2A;ortholog		ITGA5	KCNA2
DPYSL3	Dihydropyrimidinase-related protein 3;DPYSL3;ortholog		JAK2	KCND2
DTNA	Dystrobrevin alpha;DTNA;ortholog		KCNMB1	KCNJ10
EFNA5	Ephrin-A5;EFNA5;ortholog		LAMP1	KCNK9
EGR3	Early growth response protein 3;EGR3;ortholog		LZTS1	KCNQ3
EIF4EBP1	Eukaryotic translation initiation factor 4E-binding protein 1;EIF4EBP1;ortholog		MAPK1	LGI1
EIF4EBP2	Eukaryotic translation initiation factor 4E-binding protein 2;EIF4EBP2;ortholog		MBP	LIN7A
ENAH	Protein enabled homolog;ENAH;ortholog		MX1	LPAR1
FAM107A	Actin-associated protein FAM107A;FAM107A;ortholog		MX2	LRFN5
FARP1	FERM, ARHGEF and pleckstrin domain-containing protein 1;FARP1;ortholog		MYD88	LRP4
FCGR2B	Low affinity immunoglobulin gamma Fc region receptor II-b;FCGR2B;ortholog		NPAS4	LRP8
FGF12	Fibroblast growth factor 12;FGF12;ortholog		NQO1	LYPD6
FLNA	Filamin-A;FLNA;ortholog		NRP1	MAP1B
FRMPD4	FERM and PDZ domain-containing protein 4;FRMPD4;ortholog		NRP2	NRG3
GABBR1	Gamma-aminobutyric acid type B receptor subunit 1;GABBR1;ortholog		NTNG2	NRXN1
GABRA2	Gamma-aminobutyric acid receptor subunit alpha-2;GABRA2;ortholog		PDLIM4	NSF
GABRB1	Gamma-aminobutyric acid receptor subunit beta-1;GABRB1;ortholog		PDLIM5	ODZ2
GABRG1	Gamma-aminobutyric acid receptor subunit gamma-1;GABRG1;ortholog		PFN1	OLFM3
GLS	Glutaminase kidney isoform, mitochondrial;GLS;ortholog		PLAT	PLCB1
GLUL	Glutamine synthetase;GLUL;ortholog		PSMA3	PLP1
GNB1	Guanine nucleotide-binding protein G(I)/G(S)/G(T) subunit beta-1;GNB1;ortholog		RASGRP2	POSTN
GNRH1	Progonadoliberin-1;GNRH1;ortholog		RELA	PPP1R9A
GRASP	General receptor for phosphoinositides 1-associated scaffold protein;GRASP;ortholog		RNF40	PRKCB
GRIA1	Glutamate receptor 1;GRIA1;ortholog		SH3KBP1	PRSS12
GRIA3	Glutamate receptor 3;GRIA3;ortholog		SLC12A7	PSD2
GRIK1	Glutamate receptor ionotropic, kainate 1;GRIK1;ortholog		SLC16A3	PSD3
GRM3	Metabotropic glutamate receptor 3;GRM3;ortholog		SNTB2	PSMC2
GRM5	Metabotropic glutamate receptor 5;GRM5;ortholog		SRGN	RAB21
HTR1E	5-hydroxytryptamine receptor 1E;HTR1E;ortholog		SRPX2	RAB3B
IL1RAP	Interleukin-1 receptor accessory protein;IL1RAP;ortholog		STAC3	SEPTIN-4
ITGA5	Integrin alpha-5;ITGA5;ortholog		STAT3	SEPTIN-6
ITPR1	Inositol 1,4,5-trisphosphate receptor type 1;ITPR1;ortholog		STX11	SHC3
JAK2	Tyrosine-protein kinase JAK2;JAK2;ortholog		SYNGR2	SLC1A2
KCNA2	Potassium voltage-gated channel subfamily A member 2;KCNA2;ortholog		TAC1	SLC4A7
KCND2	Potassium voltage-gated channel subfamily D member 2;KCND2;ortholog		XRN1	SLC6A5
KCNJ10	ATP-sensitive inward rectifier potassium channel 10;KCNJ10;ortholog		ZBP1	SLC6A5
KCNK9	Potassium channel subfamily K member 9;KCNK9;ortholog			SLITRK1
KCNMB1	Calcium-activated potassium channel subunit beta-1;KCNMB1;ortholog			SLITRK4
KCNQ3	Potassium voltage-gated channel subfamily KQT member 3;KCNQ3;ortholog			SOS1
LAMP1	Lysosome-associated membrane glycoprotein 1;LAMP1;ortholog			SPARC
LGI1	Leucine-rich glioma-inactivated protein 1;LGI1;ortholog			SPARCL1
LIN7A	Protein lin-7 homolog A;LIN7A;ortholog			SRI
LPAR1	Lysophosphatidic acid receptor 1;LPAR1;ortholog			SSPN
LRFN5	Leucine-rich repeat and fibronectin type-III domain-containing protein 5;LRFN5;ortholog			SYNE1
LRP4	Low-density lipoprotein receptor-related protein 4;LRP4;ortholog			TNIK
LRP8	Low-density lipoprotein receptor-related protein 8;LRP8;ortholog			TNR
LYPD6	Ly6/PLAUR domain-containing protein 6;LYPD6;ortholog			UNC13B
LZTS1	Leucine zipper putative tumor suppressor 1;LZTS1;ortholog			UNC13C
MAP1B	Microtubule-associated protein 1B;MAP1B;ortholog
MAPK1	Mitogen-activated protein kinase 1;MAPK1;ortholog
MBP	Myelin basic protein;MBP;ortholog
MX1	Interferon-induced GTP-binding protein Mx1;MX1;ortholog
MX2	Interferon-induced GTP-binding protein Mx2;MX2;ortholog
MYD88	Myeloid differentiation primary response protein MyD88;MYD88;ortholog
NPAS4	Neuronal PAS domain-containing protein 4;NPAS4;ortholog
NQO1	NAD(P)H dehydrogenase [quinone] 1;NQO1;ortholog
NRG3	Pro-neuregulin-3, membrane-bound isoform;NRG3;ortholog
NRP1	Neuropilin-1;NRP1;ortholog
NRP2	Neuropilin-2;NRP2;ortholog
NRXN1	Neurexin-1;NRXN1;ortholog
NSF	Vesicle-fusing ATPase;NSF;ortholog
NTNG2	Netrin-G2;NTNG2;ortholog
ODZ2	Teneurin-2;TENM2;ortholog
OLFM3	Noelin-3;OLFM3;ortholog
PDLIM4	PDZ and LIM domain protein 4;PDLIM4;ortholog
PDLIM5	PDZ and LIM domain protein 5;PDLIM5;ortholog
PFN1	Profilin-1;PFN1;ortholog
PLAT	Tissue-type plasminogen activator;PLAT;ortholog
PLCB1	1-phosphatidylinositol 4,5-bisphosphate phosphodiesterase beta-1;PLCB1;ortholog
PLP1	Myelin proteolipid protein;PLP1;ortholog
POSTN	Periostin;POSTN;ortholog
PPP1R9A	Neurabin-1;PPP1R9A;ortholog
PRKCB	Protein kinase C beta type;PRKCB;ortholog
PRSS12	Neurotrypsin;PRSS12;ortholog
PSD2	PH and SEC7 domain-containing protein 2;PSD2;ortholog
PSD3	PH and SEC7 domain-containing protein 3;PSD3;ortholog
PSMA3	Proteasome subunit alpha type-3;PSMA3;ortholog
PSMC2	26S proteasome regulatory subunit 7;PSMC2;ortholog
RAB21	Ras-related protein Rab-21;RAB21;ortholog
RAB3B	Ras-related protein Rab-3B;RAB3B;ortholog
RASGRP2	RAS guanyl-releasing protein 2;RASGRP2;ortholog
RELA	Transcription factor p65;RELA;ortholog
RNF40	E3 ubiquitin-protein ligase BRE1B;RNF40;ortholog
SEPTIN-4	Septin-4;SEPT4;ortholog
SEPTIN-6	Septin-6;SEPT6;ortholog
SH3KBP1	SH3 domain-containing kinase-binding protein 1;SH3KBP1;ortholog
SHC3	SHC-transforming protein 3;SHC3;ortholog
SLC12A7	Solute carrier family 12 member 7;SLC12A7;ortholog
SLC16A3	Monocarboxylate transporter 4;SLC16A3;ortholog
SLC1A2	Excitatory amino acid transporter 2;SLC1A2;ortholog
SLC4A7	Sodium bicarbonate cotransporter 3;SLC4A7;ortholog
SLC6A5	Sodium- and chloride-dependent glycine transporter 2;SLC6A5;ortholog
SLC6A5	Sodium-dependent noradrenaline transporter;SLC6A2;ortholog
SLITRK1	SLIT and NTRK-like protein 1;SLITRK1;ortholog
SLITRK4	SLIT and NTRK-like protein 4;SLITRK4;ortholog
SNTB2	Beta-2-syntrophin;SNTB2;ortholog
SOS1	Son of sevenless homolog 1;SOS1;ortholog
SPARC	SPARC;SPARC;ortholog
SPARCL1	SPARC-like protein 1;SPARCL1;ortholog
SRGN	Serglycin;SRGN;ortholog
SRI	Sorcin;SRI;ortholog
SRPX2	Sushi repeat-containing protein SRPX2;SRPX2;ortholog
SSPN	Sarcospan;SSPN;ortholog
STAC3	SH3 and cysteine-rich domain-containing protein 3;STAC3;ortholog
STAT3	Signal transducer and activator of transcription 3;STAT3;ortholog
STX11	Syntaxin-11;STX11;ortholog
SYNE1	Nesprin-1;SYNE1;ortholog
SYNGR2	Synaptogyrin-2;SYNGR2;ortholog
TAC1	Protachykinin-1;TAC1;ortholog
TNIK	TRAF2 and NCK-interacting protein kinase;TNIK;ortholog
TNR	Tenascin-R;TNR;ortholog
UNC13B	Protein unc-13 homolog B;UNC13B;ortholog
UNC13C	Protein unc-13 homolog C;UNC13C;ortholog
XRN1	5'-3' exoribonuclease 1;XRN1;ortholog
ZBP1	Insulin-like growth factor 2 mRNA-binding protein 1;IGF2BP1;ortholog

## Sheet: 86 Synaptic genes_SpC_7dpi
All differentially regulated synaptic genes (86)			Upregulated synaptic genes (44)	Downregulated synaptic genes (42)
ABHD6	Monoacylglycerol lipase ABHD6;ABHD6;ortholog		ABHD6	CAMK2G
ACTN1	Alpha-actinin-1;ACTN1;ortholog		ACTN1	CDH15
AKAP5	A-kinase anchor protein 5;AKAP5;ortholog		AKAP5	CLN8
ANXA1	Annexin A1;ANXA1;ortholog		ANXA1	CNTN1
ARPC2	Actin-related protein 2/3 complex subunit 2;ARPC2;ortholog		ARPC2	COL4A5
BDNF	Brain-derived neurotrophic factor;BDNF;ortholog		BDNF	FGFR2
C1QA	Complement C1q subcomponent subunit A;C1QA;ortholog		C1QA	FLRT3
C1QC	Complement C1q subcomponent subunit C;C1QC;ortholog		C1QC	GABRB3
CADM1	Cell adhesion molecule 1;CADM1;ortholog		CADM1	GRIN3A
CAMK2G	Calcium/calmodulin-dependent protein kinase type II subunit gamma;CAMK2G;ortholog		CAMK4	GRM1
CAMK4	Calcium/calmodulin-dependent protein kinase type IV;CAMK4;ortholog		DES	GRM5
CDH15	Cadherin-15;CDH15;ortholog		DTNA	HAPLN1
CLN8	Protein CLN8;CLN8;ortholog		EIF4EBP2	HTR6
CNTN1	Contactin-1;CNTN1;ortholog		EPHB2	IQSEC3
COL4A5	Collagen alpha-5(IV) chain;COL4A5;ortholog		FABP5	KCNB1
DES	Desmin;DES;ortholog		FCGR2B	KCNJ10
DTNA	Dystrobrevin alpha;DTNA;ortholog		GLS	LGI1
EIF4EBP2	Eukaryotic translation initiation factor 4E-binding protein 2;EIF4EBP2;ortholog		GLUL	LPAR3
EPHB2	Ephrin type-B receptor 2;EPHB2;ortholog		GNB1	LRP4
FABP5	Fatty acid-binding protein 5;FABP5;ortholog		IL1RAP	LRP6
FCGR2B	Low affinity immunoglobulin gamma Fc region receptor II-b;FCGR2B;ortholog		ITGA5	LRRC7
FGFR2	Fibroblast growth factor receptor 2;FGFR2;ortholog		LYN	MBP
FLRT3	Leucine-rich repeat transmembrane protein FLRT3;FLRT3;ortholog		MX1	NETO1
GABRB3	Gamma-aminobutyric acid receptor subunit beta-3;GABRB3;ortholog		MX2	NLGN3
GLS	Glutaminase kidney isoform, mitochondrial;GLS;ortholog		MYD88	NRG3
GLUL	Glutamine synthetase;GLUL;ortholog		NAT1	PDZRN3
GNB1	Guanine nucleotide-binding protein G(I)/G(S)/G(T) subunit beta-1;GNB1;ortholog		NCK2	PRSS12
GRIN3A	Glutamate receptor ionotropic, NMDA 3A;GRIN3A;ortholog		NGFR	PSD2
GRM1	Metabotropic glutamate receptor 1;GRM1;ortholog		PAK2	PTCH1
GRM5	Metabotropic glutamate receptor 5;GRM5;ortholog		PTK2B	PTN
HAPLN1	Hyaluronan and proteoglycan link protein 1;HAPLN1;ortholog		RAB8A	QKI
HTR6	5-hydroxytryptamine receptor 6;HTR6;ortholog		RELA	RAPGEF4
IL1RAP	Interleukin-1 receptor accessory protein;IL1RAP;ortholog		SAMD4A	SEPTIN-6
IQSEC3	IQ motif and SEC7 domain-containing protein 3;IQSEC3;ortholog		SEMA3F	SHC3
ITGA5	Integrin alpha-5;ITGA5;ortholog		SLC12A7	SHISA6
KCNB1	Potassium voltage-gated channel subfamily B member 1;KCNB1;ortholog		SLC16A3	SLC17A8
KCNJ10	ATP-sensitive inward rectifier potassium channel 10;KCNJ10;ortholog		SNTB2	SRCIN1
LGI1	Leucine-rich glioma-inactivated protein 1;LGI1;ortholog		SRGN	SRI
LPAR3	Lysophosphatidic acid receptor 3;LPAR3;ortholog		STAC3	SSPN
LRP4	Low-density lipoprotein receptor-related protein 4;LRP4;ortholog		STAT3	SYNE1
LRP6	Low-density lipoprotein receptor-related protein 6;LRP6;ortholog		STX11	TIAM1
LRRC7	Leucine-rich repeat-containing protein 7;LRRC7;ortholog		STX7	USP46
LYN	Tyrosine-protein kinase Lyn;LYN;ortholog		XRN1
MBP	Myelin basic protein;MBP;ortholog		ZBP1
MX1	Interferon-induced GTP-binding protein Mx1;MX1;ortholog
MX2	Interferon-induced GTP-binding protein Mx2;MX2;ortholog
MYD88	Myeloid differentiation primary response protein MyD88;MYD88;ortholog
NAT1	Sodium-dependent noradrenaline transporter;SLC6A2;ortholog
NCK2	Cytoplasmic protein NCK2;NCK2;ortholog
NETO1	Neuropilin and tolloid-like protein 1;NETO1;ortholog
NGFR	Tumor necrosis factor receptor superfamily member 16;NGFR;ortholog
NLGN3	Neuroligin-3;NLGN3;ortholog
NRG3	Pro-neuregulin-3, membrane-bound isoform;NRG3;ortholog
PAK2	Serine/threonine-protein kinase PAK 2;PAK2;ortholog
PDZRN3	E3 ubiquitin-protein ligase PDZRN3;PDZRN3;ortholog
PRSS12	Neurotrypsin;PRSS12;ortholog
PSD2	PH and SEC7 domain-containing protein 2;PSD2;ortholog
PTCH1	Protein patched homolog 1;PTCH1;ortholog
PTK2B	Protein-tyrosine kinase 2-beta;PTK2B;ortholog
PTN	Pleiotrophin;PTN;ortholog
QKI	Protein quaking;QKI;ortholog
RAB8A	Ras-related protein Rab-8A;RAB8A;ortholog
RAPGEF4	Rap guanine nucleotide exchange factor 4;RAPGEF4;ortholog
RELA	Transcription factor p65;RELA;ortholog
SAMD4A	Protein Smaug homolog 1;SAMD4A;ortholog
SEMA3F	Semaphorin-3F;SEMA3F;ortholog
SEPTIN-6	Septin-6;SEPT6;ortholog
SHC3	SHC-transforming protein 3;SHC3;ortholog
SHISA6	Protein shisa-6;SHISA6;ortholog
SLC12A7	Solute carrier family 12 member 7;SLC12A7;ortholog
SLC16A3	Monocarboxylate transporter 4;SLC16A3;ortholog
SLC17A8	Vesicular glutamate transporter 3;SLC17A8;ortholog
SNTB2	Beta-2-syntrophin;SNTB2;ortholog
SRCIN1	SRC kinase signaling inhibitor 1;SRCIN1;ortholog
SRGN	Serglycin;SRGN;ortholog
SRI	Sorcin;SRI;ortholog
SSPN	Sarcospan;SSPN;ortholog
STAC3	SH3 and cysteine-rich domain-containing protein 3;STAC3;ortholog
STAT3	Signal transducer and activator of transcription 3;STAT3;ortholog
STX11	Syntaxin-11;STX11;ortholog
STX7	Syntaxin-7;STX7;ortholog
SYNE1	Nesprin-1;SYNE1;ortholog
TIAM1	T-lymphoma invasion and metastasis-inducing protein 1;TIAM1;ortholog
USP46	Ubiquitin carboxyl-terminal hydrolase 46;USP46;ortholog
XRN1	5'-3' exoribonuclease 1;XRN1;ortholog
ZBP1	Insulin-like growth factor 2 mRNA-binding protein 1;IGF2BP1;ortholog

## Sheet: 383 Synaptic genes_SpC_9dpi
All differentially regulated synaptic genes (383)			Upregulated synaptic genes (109)	Downregulated synaptic genes (274)
AAK1	AP2-associated protein kinase 1;AAK1;ortholog		ABHD6	AAK1
ABHD6	Monoacylglycerol lipase ABHD6;ABHD6;ortholog		ADORA2A	ABI2
ABI2	Abl interactor 2;ABI2;ortholog		ADORA2B	ADAM10
ADAM10	Disintegrin and metalloproteinase domain-containing protein 10;ADAM10;ortholog		ADRBK1	ADAM22
ADAM22	Disintegrin and metalloproteinase domain-containing protein 22;ADAM22;ortholog		ANXA1	ADAM23
ADAM23	Disintegrin and metalloproteinase domain-containing protein 23;ADAM23;ortholog		APBA3	ADCY1
ADCY1	Adenylate cyclase type 1;ADCY1;ortholog		APH1A	ADD3
ADD3	Gamma-adducin;ADD3;ortholog		APOE	ADGRL3
ADGRL3	Adhesion G protein-coupled receptor L3;ADGRL3;ortholog		ARF1	AKAP12
ADORA2A	Adenosine receptor A2a;ADORA2A;ortholog		ARHGDIA	ANK2
ADORA2B	Adenosine receptor A2b;ADORA2B;ortholog		ARPC2	ANK3
ADRBK1	Beta-adrenergic receptor kinase 1;GRK2;ortholog		BCL2L1	ANKS1B
AKAP12	A-kinase anchor protein 12;AKAP12;ortholog		BDNF	APBB2
ANK2	Ankyrin-2;ANK2;ortholog		BLVRB	APP
ANK3	Ankyrin-3;ANK3;ortholog		C1QA	ARFGEF2
ANKS1B	Ankyrin repeat and sterile alpha motif domain-containing protein 1B;ANKS1B;ortholog		C1QC	ARHGAP22
ANXA1	Annexin A1;ANXA1;ortholog		C1QL1	ARHGAP32
APBA3	Amyloid-beta A4 precursor protein-binding family A member 3;APBA3;ortholog		CARTPT	ATP1A2
APBB2	Amyloid-beta A4 precursor protein-binding family B member 2;APBB2;ortholog		CBLN3	ATP2B1
APH1A	Gamma-secretase subunit APH-1A;APH1A;ortholog		CHRNB1	ATP2B2
APOE	Apolipoprotein E;APOE;ortholog		CLN3	ATP2B4
APP	Amyloid-beta precursor protein;APP;ortholog		CLN8	BACE1
ARF1	ADP-ribosylation factor 1;ARF1;ortholog		CORO1A	BAI3
ARFGEF2	Brefeldin A-inhibited guanine nucleotide-exchange protein 2;ARFGEF2;ortholog		CRH	BCAS1
ARHGAP22	Rho GTPase-activating protein 22;ARHGAP22;ortholog		DES	BCL11A
ARHGAP32	Rho GTPase-activating protein 32;ARHGAP32;ortholog		DLGAP4	BCR
ARHGDIA	Rho GDP-dissociation inhibitor 1;ARHGDIA;ortholog		DNM2	BMPR2
ARPC2	Actin-related protein 2/3 complex subunit 2;ARPC2;ortholog		DTNA	BTBD8
ATP1A2	Sodium/potassium-transporting ATPase subunit alpha-2;ATP1A2;ortholog		EFNB1	CACNA1B
ATP2B1	Plasma membrane calcium-transporting ATPase 1;ATP2B1;ortholog		EGR3	CACNA1D
ATP2B2	Plasma membrane calcium-transporting ATPase 2;ATP2B2;ortholog		EIF4EBP1	CACNB4
ATP2B4	Plasma membrane calcium-transporting ATPase 4;ATP2B4;ortholog		EIF4EBP2	CADM1
BACE1	Beta-secretase 1;BACE1;ortholog		ELAVL1	CADM2
BAI3	Adhesion G protein-coupled receptor B3;ADGRB3;ortholog		EPHA1	CADPS
BCAS1	Breast carcinoma-amplified sequence 1;BCAS1;ortholog		EPHB2	CALCA
BCL11A	B-cell lymphoma/leukemia 11A;BCL11A;ortholog		F2R	CAMK2G
BCL2L1	Bcl-2-like protein 1;BCL2L1;ortholog		FCGR2B	CAPRIN1
BCR	Breakpoint cluster region protein;BCR;ortholog		FLNA	CDH13
BDNF	Brain-derived neurotrophic factor;BDNF;ortholog		GABBR1	CDH15
BLVRB	Flavin reductase (NADPH);BLVRB;ortholog		GJC1	CDH2
BMPR2	Bone morphogenetic protein receptor type-2;BMPR2;ortholog		GLS	CDH8
BTBD8	BTB/POZ domain-containing protein 8;BTBD8;ortholog		GLUL	CDKL5
C1QA	Complement C1q subcomponent subunit A;C1QA;ortholog		GNAI2	CEP112
C1QC	Complement C1q subcomponent subunit C;C1QC;ortholog		GNB1	CHRM3
C1QL1	C1q-related factor;C1QL1;ortholog		GRASP	CLCN4
CACNA1B	Voltage-dependent N-type calcium channel subunit alpha-1B;CACNA1B;ortholog		HTR1A	CLCN5
CACNA1D	Voltage-dependent L-type calcium channel subunit alpha-1D;CACNA1D;ortholog		IL1RAP	CLTC
CACNB4	Voltage-dependent L-type calcium channel subunit beta-4;CACNB4;ortholog		ITGA3	CNKSR2
CADM1	Cell adhesion molecule 1;CADM1;ortholog		ITGA5	CNP
CADM2	Cell adhesion molecule 2;CADM2;ortholog		KCNMB1	CNTN1
CADPS	Calcium-dependent secretion activator 1;CADPS;ortholog		LAMA5	CNTN6
CALCA	Calcitonin;CALCA;ortholog		LYN	CNTNAP1
CAMK2G	Calcium/calmodulin-dependent protein kinase type II subunit gamma;CAMK2G;ortholog		LZTS1	CNTNAP4
CAPRIN1	Caprin-1;CAPRIN1;ortholog		MAPK1	COL4A5
CARTPT	Cocaine- and amphetamine-regulated transcript protein;CARTPT;ortholog		MDGA1	COPS4
CBLN3	Cerebellin-3;CBLN3;ortholog		MECP2	CPEB3
CDH13	Cadherin-13;CDH13;ortholog		MX1	CPEB4
CDH15	Cadherin-15;CDH15;ortholog		MX2	CRIPT
CDH2	Cadherin-2;CDH2;ortholog		MYD88	CTBP2
CDH8	Cadherin-8;CDH8;ortholog		NAPA	CTNNA2
CDKL5	Cyclin-dependent kinase-like 5;CDKL5;ortholog		NCSTN	CTTNBP2
CEP112	Centrosomal protein of 112 kDa;CEP112;ortholog		NEU1	CXADR
CHRM3	Muscarinic acetylcholine receptor M3;CHRM3;ortholog		NGFR	CYFIP2
CHRNB1	Acetylcholine receptor subunit beta;CHRNB1;ortholog		NPTX2	DAB1
CLCN4	H(+)/Cl(-) exchange transporter 4;CLCN4;ortholog		NQO1	DCC
CLCN5	H(+)/Cl(-) exchange transporter 5;CLCN5;ortholog		NRP1	DGKB
CLN3	Battenin;CLN3;ortholog		NRP2	DGKE
CLN8	Protein CLN8;CLN8;ortholog		P2RX4	DGKI
CLTC	Clathrin heavy chain 1;CLTC;ortholog		PAFAH1B1	DLG1
CNKSR2	Connector enhancer of kinase suppressor of ras 2;CNKSR2;ortholog		PAK2	DLGAP2
CNP	2',3'-cyclic-nucleotide 3'-phosphodiesterase;CNP;ortholog		PDLIM4	DNM1L
CNTN1	Contactin-1;CNTN1;ortholog		PFN1	DNM3
CNTN6	Contactin-6;CNTN6;ortholog		PGS1	DNMBP
CNTNAP1	Contactin-associated protein 1;CNTNAP1;ortholog		PI4K2A	DOCK10
CNTNAP4	Contactin-associated protein-like 4;CNTNAP4;ortholog		PNOC	EGFR
COL4A5	Collagen alpha-5(IV) chain;COL4A5;ortholog		PTK2B	EIF2S1
COPS4	COP9 signalosome complex subunit 4;COPS4;ortholog		RAB35	EIF3A
CORO1A	Coronin-1A;CORO1A;ortholog		RELA	EIF4B
CPEB3	Cytoplasmic polyadenylation element-binding protein 3;CPEB3;ortholog		RNF40	EMB
CPEB4	Cytoplasmic polyadenylation element-binding protein 4;CPEB4;ortholog		RPH3A	ENAH
CRH	Corticoliberin;CRH;ortholog		SAMD4A	EPB41L3
CRIPT	Cysteine-rich PDZ-binding protein;CRIPT;ortholog		SDK2	EPHA4
CTBP2	C-terminal-binding protein 2;CTBP2;ortholog		SEMA3F	ERBB4
CTNNA2	Catenin alpha-2;CTNNA2;ortholog		SLC12A7	ERC2
CTTNBP2	Cortactin-binding protein 2;CTTNBP2;ortholog		SLC16A3	ETV5
CXADR	Coxsackievirus and adenovirus receptor;CXADR;ortholog		SLC1A4	EXOC4
CYFIP2	Cytoplasmic FMR1-interacting protein 2;CYFIP2;ortholog		SLC6A6	FAM196A
DAB1	Disabled homolog 1;DAB1;ortholog		SNAP29	FARP1
DCC	Netrin receptor DCC;DCC;ortholog		SNTB2	FBXO45
DES	Desmin;DES;ortholog		SRGN	FGF12
DGKB	Diacylglycerol kinase beta;DGKB;ortholog		SRPX2	FGFR2
DGKE	Diacylglycerol kinase epsilon;DGKE;ortholog		SSH1	FLRT2
DGKI	Diacylglycerol kinase iota;DGKI;ortholog		STAC3	FLRT3
DLG1	Disks large homolog 1;DLG1;ortholog		STAT3	FRRS1L
DLGAP2	Disks large-associated protein 2;DLGAP2;ortholog		STRN4	FXR1
DLGAP4	Disks large-associated protein 4;DLGAP4;ortholog		STX10	FZD3
DNM1L	Dynamin-1-like protein;DNM1L;ortholog		STX11	GABBR2
DNM2	Dynamin-2;DNM2;ortholog		STX7	GABRA5
DNM3	Dynamin-3;DNM3;ortholog		SYNGR2	GABRB1
DNMBP	Dynamin-binding protein;DNMBP;ortholog		SYNPO	GABRB3
DOCK10	Dedicator of cytokinesis protein 10;DOCK10;ortholog		TMED9	GAD1
DTNA	Dystrobrevin alpha;DTNA;ortholog		TMUB1	GHSR
EFNB1	Ephrin-B1;EFNB1;ortholog		TOR1A	GLG1
EGFR	Epidermal growth factor receptor;EGFR;ortholog		UBE2I	GLUD1
EGR3	Early growth response protein 3;EGR3;ortholog		VWC2	GNRH1
EIF2S1	Eukaryotic translation initiation factor 2 subunit 1;EIF2S1;ortholog		WFS1	GOPC
EIF3A	Eukaryotic translation initiation factor 3 subunit A;EIF3A;ortholog		XRN1	GPR98
EIF4B	Eukaryotic translation initiation factor 4B;EIF4B;ortholog		ZBP1	GRIA1
EIF4EBP1	Eukaryotic translation initiation factor 4E-binding protein 1;EIF4EBP1;ortholog		ZNRF1	GRIA2
EIF4EBP2	Eukaryotic translation initiation factor 4E-binding protein 2;EIF4EBP2;ortholog			GRIA3
ELAVL1	ELAV-like protein 1;ELAVL1;ortholog			GRIA4
EMB	Embigin;EMB;ortholog			GRIK1
ENAH	Protein enabled homolog;ENAH;ortholog			GRIK2
EPB41L3	Band 4.1-like protein 3;EPB41L3;ortholog			GRIN2B
EPHA1	Ephrin type-A receptor 1;EPHA1;ortholog			GRIN3A
EPHA4	Ephrin type-A receptor 4;EPHA4;ortholog			GRIP1
EPHB2	Ephrin type-B receptor 2;EPHB2;ortholog			GRM1
ERBB4	Receptor tyrosine-protein kinase erbB-4;ERBB4;ortholog			GRM5
ERC2	ERC protein 2;ERC2;ortholog			GSK3B
ETV5	ETS translocation variant 5;ETV5;ortholog			GUCY1A3
EXOC4	Exocyst complex component 4;EXOC4;ortholog			HAPLN1
F2R	Proteinase-activated receptor 1;F2R;ortholog			HCLS1
FAM196A	Inhibitory synaptic factor 2A;INSYN2A;ortholog			HIP1
FARP1	FERM, ARHGEF and pleckstrin domain-containing protein 1;FARP1;ortholog			HNRNPR
FBXO45	F-box/SPRY domain-containing protein 1;FBXO45;ortholog			HOMER1
FCGR2B	Low affinity immunoglobulin gamma Fc region receptor II-b;FCGR2B;ortholog			HSPA8
FGF12	Fibroblast growth factor 12;FGF12;ortholog			HTR2C
FGFR2	Fibroblast growth factor receptor 2;FGFR2;ortholog			ICA1
FLNA	Filamin-A;FLNA;ortholog			IL1RAPL1
FLRT2	Leucine-rich repeat transmembrane protein FLRT2;FLRT2;ortholog			INPP4A
FLRT3	Leucine-rich repeat transmembrane protein FLRT3;FLRT3;ortholog			IQSEC3
FRRS1L	DOMON domain-containing protein FRRS1L;FRRS1L;ortholog			ITGA2
FXR1	Fragile X mental retardation syndrome-related protein 1;FXR1;ortholog			ITGA8
FZD3	Frizzled-3;FZD3;ortholog			ITPR1
GABBR1	Gamma-aminobutyric acid type B receptor subunit 1;GABBR1;ortholog			KCNA1
GABBR2	Gamma-aminobutyric acid type B receptor subunit 2;GABBR2;ortholog			KCNA2
GABRA5	Gamma-aminobutyric acid receptor subunit alpha-5;GABRA5;ortholog			KCND2
GABRB1	Gamma-aminobutyric acid receptor subunit beta-1;GABRB1;ortholog			KCND3
GABRB3	Gamma-aminobutyric acid receptor subunit beta-3;GABRB3;ortholog			KCNJ10
GAD1	Glutamate decarboxylase 1;GAD1;ortholog			KCNK1
GHSR	Growth hormone secretagogue receptor type 1;GHSR;ortholog			KCNMA1
GJC1	Gap junction gamma-1 protein;GJC1;ortholog			KCNQ3
GLG1	Golgi apparatus protein 1;GLG1;ortholog			KIF1B
GLS	Glutaminase kidney isoform, mitochondrial;GLS;ortholog			KPNA1
GLUD1	Glutamate receptor ionotropic, delta-1;GRID1;ortholog			LAMA2
GLUL	Glutamine synthetase;GLUL;ortholog			LAMP1
GNAI2	Guanine nucleotide-binding protein G(i) subunit alpha-2;GNAI2;ortholog			LGI1
GNB1	Guanine nucleotide-binding protein G(I)/G(S)/G(T) subunit beta-1;GNB1;ortholog			LIN7A
GNRH1	Progonadoliberin-1;GNRH1;ortholog			LPAR1
GOPC	Golgi-associated PDZ and coiled-coil motif-containing protein;GOPC;ortholog			LPAR3
GPR98	Adhesion G-protein coupled receptor V1;ADGRV1;ortholog			LRP4
GRASP	General receptor for phosphoinositides 1-associated scaffold protein;GRASP;ortholog			LRP6
GRIA1	Glutamate receptor 1;GRIA1;ortholog			LRRC1
GRIA2	Glutamate receptor 2;GRIA2;ortholog			LRRC7
GRIA3	Glutamate receptor 3;GRIA3;ortholog			LRRK2
GRIA4	Glutamate receptor 4;GRIA4;ortholog			LRRTM3
GRIK1	Glutamate receptor ionotropic, kainate 1;GRIK1;ortholog			MAP1A
GRIK2	Glutamate receptor ionotropic, kainate 2;GRIK2;ortholog			MAPK8
GRIN2B	Glutamate receptor ionotropic, NMDA 2B;GRIN2B;ortholog			MBP
GRIN3A	Glutamate receptor ionotropic, NMDA 3A;GRIN3A;ortholog			MIB1
GRIP1	Glutamate receptor-interacting protein 1;GRIP1;ortholog			MKLN1
GRM1	Metabotropic glutamate receptor 1;GRM1;ortholog			MPDZ
GRM5	Metabotropic glutamate receptor 5;GRM5;ortholog			MTMR2
GSK3B	Glycogen synthase kinase-3 beta;GSK3B;ortholog			MYH10
GUCY1A3	Guanylate cyclase soluble subunit alpha-1;GUCY1A1;ortholog			MYO5A
HAPLN1	Hyaluronan and proteoglycan link protein 1;HAPLN1;ortholog			NEDD4
HCLS1	Hematopoietic lineage cell-specific protein;HCLS1;ortholog			NEFL
HIP1	Huntingtin-interacting protein 1;HIP1;ortholog			NET1
HNRNPR	Heterogeneous nuclear ribonucleoprotein R;HNRNPR;ortholog			NET1
HOMER1	Homer protein homolog 1;HOMER1;ortholog			NETO1
HSPA8	Heat shock cognate 71 kDa protein;HSPA8;ortholog			NF1
HTR1A	5-hydroxytryptamine receptor 1A;HTR1A;ortholog			NLGN1
HTR2C	5-hydroxytryptamine receptor 2C;HTR2C;ortholog			NLGN3
ICA1	Islet cell autoantigen 1;ICA1;ortholog			NLGN4Y
IL1RAP	Interleukin-1 receptor accessory protein;IL1RAP;ortholog			NMNAT2
IL1RAPL1	Interleukin-1 receptor accessory protein-like 1;IL1RAPL1;ortholog			NRCAM
INPP4A	Type I inositol 3,4-bisphosphate 4-phosphatase;INPP4A;ortholog			NRG1
IQSEC3	IQ motif and SEC7 domain-containing protein 3;IQSEC3;ortholog			NRG3
ITGA2	Integrin alpha-2;ITGA2;ortholog			NRXN1
ITGA3	Integrin alpha-3;ITGA3;ortholog			NSF
ITGA5	Integrin alpha-5;ITGA5;ortholog			NTNG1
ITGA8	Integrin alpha-8;ITGA8;ortholog			NTRK2
ITPR1	Inositol 1,4,5-trisphosphate receptor type 1;ITPR1;ortholog			NTRK3
KCNA1	Potassium voltage-gated channel subfamily A member 1;KCNA1;ortholog			ODZ2
KCNA2	Potassium voltage-gated channel subfamily A member 2;KCNA2;ortholog			P2RY1
KCND2	Potassium voltage-gated channel subfamily D member 2;KCND2;ortholog			PALMD
KCND3	Potassium voltage-gated channel subfamily D member 3;KCND3;ortholog			PCDHB13
KCNJ10	ATP-sensitive inward rectifier potassium channel 10;KCNJ10;ortholog			PDE7B
KCNK1	Potassium channel subfamily K member 1;KCNK1;ortholog			PJA2
KCNMA1	Calcium-activated potassium channel subunit alpha-1;KCNMA1;ortholog			PKP4
KCNMB1	Calcium-activated potassium channel subunit beta-1;KCNMB1;ortholog			PLAA
KCNQ3	Potassium voltage-gated channel subfamily KQT member 3;KCNQ3;ortholog			PLCB1
KIF1B	Kinesin-like protein KIF1B;KIF1B;ortholog			PLCB4
KPNA1	Importin subunit alpha-5;KPNA1;ortholog			PLDN
LAMA2	Laminin subunit alpha-2;LAMA2;ortholog			POSTN
LAMA5	Laminin subunit alpha-5;LAMA5;ortholog			PPFIA2
LAMP1	Lysosome-associated membrane glycoprotein 1;LAMP1;ortholog			PPFIBP2
LGI1	Leucine-rich glioma-inactivated protein 1;LGI1;ortholog			PPP1R9A
LIN7A	Protein lin-7 homolog A;LIN7A;ortholog			PPP2CA
LPAR1	Lysophosphatidic acid receptor 1;LPAR1;ortholog			PRKCB
LPAR3	Lysophosphatidic acid receptor 3;LPAR3;ortholog			PRSS12
LRP4	Low-density lipoprotein receptor-related protein 4;LRP4;ortholog			PSD2
LRP6	Low-density lipoprotein receptor-related protein 6;LRP6;ortholog			PSD3
LRRC1	Leucine-rich repeat-containing protein 1;LRRC1;ortholog			PSEN1
LRRC7	Leucine-rich repeat-containing protein 7;LRRC7;ortholog			PSMC2
LRRK2	Leucine-rich repeat serine/threonine-protein kinase 2;LRRK2;ortholog			PTCH1
LRRTM3	Leucine-rich repeat transmembrane neuronal protein 3;LRRTM3;ortholog			PTK2
LYN	Tyrosine-protein kinase Lyn;LYN;ortholog			PTN
LZTS1	Leucine zipper putative tumor suppressor 1;LZTS1;ortholog			PTPRD
MAP1A	Microtubule-associated protein 1A;MAP1A;ortholog			PTPRZ1
MAPK1	Mitogen-activated protein kinase 1;MAPK1;ortholog			PURA
MAPK8	Mitogen-activated protein kinase 8;MAPK8;ortholog			QKI
MBP	Myelin basic protein;MBP;ortholog			RAB12
MDGA1	MAM domain-containing glycosylphosphatidylinositol anchor protein 1;MDGA1;ortholog			RAB3B
MECP2	Methyl-CpG-binding protein 2;MECP2;ortholog			RAPGEF2
MIB1	E3 ubiquitin-protein ligase MIB1;MIB1;ortholog			RAPGEF4
MKLN1	Muskelin;MKLN1;ortholog			RGS7BP
MPDZ	Multiple PDZ domain protein;MPDZ;ortholog			RIMBP2
MTMR2	Myotubularin-related protein 2;MTMR2;ortholog			RIMS2
MX1	Interferon-induced GTP-binding protein Mx1;MX1;ortholog			RPS27
MX2	Interferon-induced GTP-binding protein Mx2;MX2;ortholog			RPS6KB1
MYD88	Myeloid differentiation primary response protein MyD88;MYD88;ortholog			RTN4
MYH10	Myosin-10;MYH10;ortholog			SCN2A
MYO5A	Unconventional myosin-Va;MYO5A;ortholog			SHANK2
NAPA	Alpha-soluble NSF attachment protein;NAPA;ortholog			SHC3
NCSTN	Nicastrin;NCSTN;ortholog			SHISA6
NEDD4	E3 ubiquitin-protein ligase NEDD4;NEDD4;ortholog			SLC12A6
NEFL	Neurofilament light polypeptide;NEFL;ortholog			SLC17A6
NET1	Sodium- and chloride-dependent glycine transporter 2;SLC6A5;ortholog			SLC17A8
NET1	Sodium-dependent noradrenaline transporter;SLC6A2;ortholog			SLC18A2
NETO1	Neuropilin and tolloid-like protein 1;NETO1;ortholog			SLC1A1
NEU1	Oxytocin-neurophysin 1;OXT;ortholog			SLC1A2
NF1	Neurofibromin;NF1;ortholog			SLC4A10
NGFR	Tumor necrosis factor receptor superfamily member 16;NGFR;ortholog			SLC5A7
NLGN1	Neuroligin-1;NLGN1;ortholog			SLC8A1
NLGN3	Neuroligin-3;NLGN3;ortholog			SLITRK1
NLGN4Y	Neuroligin-4, Y-linked;NLGN4Y;ortholog			SLITRK4
NMNAT2	Nicotinamide/nicotinic acid mononucleotide adenylyltransferase 2;NMNAT2;ortholog			SNAP25
NPTX2	Neuronal pentraxin-2;NPTX2;ortholog			SNCAIP
NQO1	NAD(P)H dehydrogenase [quinone] 1;NQO1;ortholog			SPARC
NRCAM	Neuronal cell adhesion molecule;NRCAM;ortholog			SPARCL1
NRG1	Pro-neuregulin-1, membrane-bound isoform;NRG1;ortholog			SPTBN1
NRG3	Pro-neuregulin-3, membrane-bound isoform;NRG3;ortholog			SRGAP2
NRP1	Neuropilin-1;NRP1;ortholog			SRI
NRP2	Neuropilin-2;NRP2;ortholog			SSPN
NRXN1	Neurexin-1;NRXN1;ortholog			STON2
NSF	Vesicle-fusing ATPase;NSF;ortholog			STRN
NTNG1	Netrin-G1;NTNG1;ortholog			STXBP5L
NTRK2	BDNF/NT-3 growth factors receptor;NTRK2;ortholog			SV2B
NTRK3	NT-3 growth factor receptor;NTRK3;ortholog			SYNE1
ODZ2	Teneurin-2;TENM2;ortholog			SYNJ1
P2RX4	P2X purinoceptor 4;P2RX4;ortholog			SYNJ2
P2RY1	P2Y purinoceptor 1;P2RY1;ortholog			SYNJ2BP
PAFAH1B1	Platelet-activating factor acetylhydrolase IB subunit alpha;PAFAH1B1;ortholog			SYT1
PAK2	Serine/threonine-protein kinase PAK 2;PAK2;ortholog			SYT11
PALMD	Palmdelphin;PALMD;ortholog			SYT12
PCDHB13	Protocadherin beta-13;PCDHB13;ortholog			SYT13
PDE7B	cAMP-specific 3',5'-cyclic phosphodiesterase 7B;PDE7B;ortholog			SYT6
PDLIM4	PDZ and LIM domain protein 4;PDLIM4;ortholog			TIAM1
PFN1	Profilin-1;PFN1;ortholog			TIAM2
PGS1	Tubulin polyglutamylase complex subunit 1;TPGS1;ortholog			TMOD2
PI4K2A	Phosphatidylinositol 4-kinase type 2-alpha;PI4K2A;ortholog			TNIK
PJA2	E3 ubiquitin-protein ligase Praja-2;PJA2;ortholog			TNR
PKP4	Plakophilin-4;PKP4;ortholog			UNC13A
PLAA	Phospholipase A-2-activating protein;PLAA;ortholog			UNC13B
PLCB1	1-phosphatidylinositol 4,5-bisphosphate phosphodiesterase beta-1;PLCB1;ortholog			UNC13C
PLCB4	1-phosphatidylinositol 4,5-bisphosphate phosphodiesterase beta-4;PLCB4;ortholog			USP14
PLDN	Biogenesis of lysosome-related organelles complex 1 subunit 6;BLOC1S6;ortholog			USP46
PNOC	Prepronociceptin;PNOC;ortholog			USP8
POSTN	Periostin;POSTN;ortholog			UTRN
PPFIA2	Liprin-alpha-2;PPFIA2;ortholog			VPS35
PPFIBP2	Liprin-beta-2;PPFIBP2;ortholog			YES1
PPP1R9A	Neurabin-1;PPP1R9A;ortholog			ZDHHC17
PPP2CA	Serine/threonine-protein phosphatase 2A catalytic subunit alpha isoform;PPP2CA;ortholog			ZMYND8
PRKCB	Protein kinase C beta type;PRKCB;ortholog
PRSS12	Neurotrypsin;PRSS12;ortholog
PSD2	PH and SEC7 domain-containing protein 2;PSD2;ortholog
PSD3	PH and SEC7 domain-containing protein 3;PSD3;ortholog
PSEN1	Presenilin-1;PSEN1;ortholog
PSMC2	26S proteasome regulatory subunit 7;PSMC2;ortholog
PTCH1	Protein patched homolog 1;PTCH1;ortholog
PTK2	Focal adhesion kinase 1;PTK2;ortholog
PTK2B	Protein-tyrosine kinase 2-beta;PTK2B;ortholog
PTN	Pleiotrophin;PTN;ortholog
PTPRD	Receptor-type tyrosine-protein phosphatase delta;PTPRD;ortholog
PTPRZ1	Receptor-type tyrosine-protein phosphatase zeta;PTPRZ1;ortholog
PURA	Transcriptional activator protein Pur-alpha;PURA;ortholog
QKI	Protein quaking;QKI;ortholog
RAB12	Ras-related protein Rab-12;RAB12;ortholog
RAB35	Ras-related protein Rab-35;RAB35;ortholog
RAB3B	Ras-related protein Rab-3B;RAB3B;ortholog
RAPGEF2	Rap guanine nucleotide exchange factor 2;RAPGEF2;ortholog
RAPGEF4	Rap guanine nucleotide exchange factor 4;RAPGEF4;ortholog
RELA	Transcription factor p65;RELA;ortholog
RGS7BP	Regulator of G-protein signaling 7-binding protein;RGS7BP;ortholog
RIMBP2	RIMS-binding protein 2;RIMBP2;ortholog
RIMS2	Regulating synaptic membrane exocytosis protein 2;RIMS2;ortholog
RNF40	E3 ubiquitin-protein ligase BRE1B;RNF40;ortholog
RPH3A	Rabphilin-3A;RPH3A;ortholog
RPS27	40S ribosomal protein S27;RPS27;ortholog
RPS6KB1	Ribosomal protein S6 kinase beta-1;RPS6KB1;ortholog
RTN4	Reticulon-4;RTN4;ortholog
SAMD4A	Protein Smaug homolog 1;SAMD4A;ortholog
SCN2A	Sodium channel protein type 2 subunit alpha;SCN2A;ortholog
SDK2	Protein sidekick-2;SDK2;ortholog
SEMA3F	Semaphorin-3F;SEMA3F;ortholog
SHANK2	SH3 and multiple ankyrin repeat domains protein 2;SHANK2;ortholog
SHC3	SHC-transforming protein 3;SHC3;ortholog
SHISA6	Protein shisa-6;SHISA6;ortholog
SLC12A6	Solute carrier family 12 member 6;SLC12A6;ortholog
SLC12A7	Solute carrier family 12 member 7;SLC12A7;ortholog
SLC16A3	Monocarboxylate transporter 4;SLC16A3;ortholog
SLC17A6	Vesicular glutamate transporter 2;SLC17A6;ortholog
SLC17A8	Vesicular glutamate transporter 3;SLC17A8;ortholog
SLC18A2	Synaptic vesicular amine transporter;SLC18A2;ortholog
SLC1A1	Excitatory amino acid transporter 3;SLC1A1;ortholog
SLC1A2	Excitatory amino acid transporter 2;SLC1A2;ortholog
SLC1A4	Neutral amino acid transporter A;SLC1A4;ortholog
SLC4A10	Sodium-driven chloride bicarbonate exchanger;SLC4A10;ortholog
SLC5A7	High affinity choline transporter 1;SLC5A7;ortholog
SLC6A6	Sodium- and chloride-dependent taurine transporter;SLC6A6;ortholog
SLC8A1	Sodium/calcium exchanger 1;SLC8A1;ortholog
SLITRK1	SLIT and NTRK-like protein 1;SLITRK1;ortholog
SLITRK4	SLIT and NTRK-like protein 4;SLITRK4;ortholog
SNAP25	Synaptosomal-associated protein 25;SNAP25;ortholog
SNAP29	Synaptosomal-associated protein 29;SNAP29;ortholog
SNCAIP	Synphilin-1;SNCAIP;ortholog
SNTB2	Beta-2-syntrophin;SNTB2;ortholog
SPARC	SPARC;SPARC;ortholog
SPARCL1	SPARC-like protein 1;SPARCL1;ortholog
SPTBN1	Spectrin beta chain, non-erythrocytic 1;SPTBN1;ortholog
SRGAP2	SLIT-ROBO Rho GTPase-activating protein 2;SRGAP2;ortholog
SRGN	Serglycin;SRGN;ortholog
SRI	Sorcin;SRI;ortholog
SRPX2	Sushi repeat-containing protein SRPX2;SRPX2;ortholog
SSH1	Protein phosphatase Slingshot homolog 1;SSH1;ortholog
SSPN	Sarcospan;SSPN;ortholog
STAC3	SH3 and cysteine-rich domain-containing protein 3;STAC3;ortholog
STAT3	Signal transducer and activator of transcription 3;STAT3;ortholog
STON2	Stonin-2;STON2;ortholog
STRN	Striatin;STRN;ortholog
STRN4	Striatin-4;STRN4;ortholog
STX10	Syntaxin-10;STX10;ortholog
STX11	Syntaxin-11;STX11;ortholog
STX7	Syntaxin-7;STX7;ortholog
STXBP5L	Syntaxin-binding protein 5-like;STXBP5L;ortholog
SV2B	Synaptic vesicle glycoprotein 2B;SV2B;ortholog
SYNE1	Nesprin-1;SYNE1;ortholog
SYNGR2	Synaptogyrin-2;SYNGR2;ortholog
SYNJ1	Synaptojanin-1;SYNJ1;ortholog
SYNJ2	Synaptojanin-2;SYNJ2;ortholog
SYNJ2BP	Synaptojanin-2-binding protein;SYNJ2BP;ortholog
SYNPO	Synaptopodin;SYNPO;ortholog
SYT1	Synaptotagmin-1;SYT1;ortholog
SYT11	Synaptotagmin-11;SYT11;ortholog
SYT12	Synaptotagmin-12;SYT12;ortholog
SYT13	Synaptotagmin-13;SYT13;ortholog
SYT6	Synaptotagmin-6;SYT6;ortholog
TIAM1	T-lymphoma invasion and metastasis-inducing protein 1;TIAM1;ortholog
TIAM2	T-lymphoma invasion and metastasis-inducing protein 2;TIAM2;ortholog
TMED9	Transmembrane emp24 domain-containing protein 9;TMED9;ortholog
TMOD2	Tropomodulin-2;TMOD2;ortholog
TMUB1	Transmembrane and ubiquitin-like domain-containing protein 1;TMUB1;ortholog
TNIK	TRAF2 and NCK-interacting protein kinase;TNIK;ortholog
TNR	Tenascin-R;TNR;ortholog
TOR1A	Torsin-1A;TOR1A;ortholog
UBE2I	SUMO-conjugating enzyme UBC9;UBE2I;ortholog
UNC13A	Protein unc-13 homolog A;UNC13A;ortholog
UNC13B	Protein unc-13 homolog B;UNC13B;ortholog
UNC13C	Protein unc-13 homolog C;UNC13C;ortholog
USP14	Ubiquitin carboxyl-terminal hydrolase 14;USP14;ortholog
USP46	Ubiquitin carboxyl-terminal hydrolase 46;USP46;ortholog
USP8	Ubiquitin carboxyl-terminal hydrolase 8;USP8;ortholog
UTRN	Utrophin;UTRN;ortholog
VPS35	Vacuolar protein sorting-associated protein 35;VPS35;ortholog
VWC2	Brorin;VWC2;ortholog
WFS1	Wolframin;WFS1;ortholog
XRN1	5'-3' exoribonuclease 1;XRN1;ortholog
YES1	Tyrosine-protein kinase Yes;YES1;ortholog
ZBP1	Insulin-like growth factor 2 mRNA-binding protein 1;IGF2BP1;ortholog
ZDHHC17	Palmitoyltransferase ZDHHC17;ZDHHC17;ortholog
ZMYND8	Protein kinase C-binding protein 1;ZMYND8;ortholog
ZNRF1	E3 ubiquitin-protein ligase ZNRF1;ZNRF1;ortholog
