# Supplementary material for: Virus infection of the CNS disrupts the immune-neural-synaptic axis via induction of pleiotropic gene regulation of host responses
Source: eLife. 2021 Feb 18;10:e62273. doi: 10.7554/eLife.62273 (PMC7891934; doi:10.7554/eLife.62273)
Supplement: Supplementary file 3. [file elife-62273-supp3.xlsx]

## Sheet: Cerebellum_9dpi
GO term ID	GO domain	GO term name	GO term name - hierarchical structure	GO parent term ID	GSEA p-value	GSEA 'gene cluster' FDR corrected p-value	genes - hgnc_symbol
GO:0045202	CC	synapse	synapse		3.58143e-51	6.44658e-50	RAB21;AGRN;ARPC2;LIN7A;RELA;ADORA2B;ARHGDIA;DPYSL3;SPARC;CORO1A;ANXA1;UNC13C;UNC13B;PFN1;PPP1R9A;TNIK;CNTN6;PRKCB;NSF;CALB1;NTNG2;DGKI;CANX;GRIA1;GABRA2;GABRB1;GABBR1;NRXN1;GRIA3;RAB3B;DOC2A;LAMP1;PLAT;CNTN1;KCNA2;SLC6A5;CNTNAP4;ADORA2A;GRIK1;SLC1A2;GRM3;LPAR1;ITPR1;APOE;LGI1;SPARCL1;FLNA;CYFIP1;APC2;JAK2;PSD2;EIF4EBP2;EIF4EBP1;SYNE1;SRGN;KCND2;GRASP;STAT3;MAPK1;FRMPD4;ACTN2;LZTS1;CNKSR2;ADAM22;S…
GO:0098793	CC	presynapse	├─ presynapse	GO:0045202	8.82558e-20	5.29535e-19	UNC13C;UNC13B;PFN1;PPP1R9A;TNIK;CNTN6;PRKCB;NSF;CALB1;NTNG2;DGKI;CANX;GRIA1;GABRA2;GABRB1;GABBR1;NRXN1;GRIA3;RAB3B;DOC2A;LAMP1;PLAT;CNTN1;KCNA2;SLC6A5;CNTNAP4;ADORA2A;GRIK1;SLC1A2;GRM3;LPAR1;ITPR1
GO:0099523	CC	presynaptic cytosol	│ ├─ presynaptic cytosol	GO:0098793	0.0017913	0.00201521	PRKCB;NSF;CALB1
GO:0048787	CC	presynaptic active zone membrane	│ │ └─ presynaptic active zone membrane	GO:0048786	2.5089e-09	4.51602e-09	NTNG2;DGKI;CANX;GRIA1;GABRA2;GABRB1;GABBR1;NRXN1;GRIA3
GO:0099059	CC	integral component of presynaptic active zone membrane	│ │ └─ integral component of presynaptic active zone membrane	GO:0048787	1.9305e-07	2.89575e-07	CANX;GRIA1;GABRA2;GABRB1;GABBR1;NRXN1;GRIA3
GO:0008021	CC	synaptic vesicle	│ ├─ synaptic vesicle	GO:0098793	0.0133875	0.014175	DGKI;RAB3B;DOC2A;LAMP1
GO:0030672	CC	synaptic vesicle membrane	│ │ └─ synaptic vesicle membrane	GO:0008021	0.0316087	0.0316087	RAB3B;DOC2A;LAMP1
GO:0042734	CC	presynaptic membrane	│ ├─ presynaptic membrane	GO:0098793	8.17543e-12	2.10225e-11	CNTN1;CNTN6;KCNA2;SLC6A5;CNTNAP4;NRXN1;ADORA2A;GRIK1;GRIA1;GRIA3;GABBR1;SLC1A2;GRM3;LPAR1
GO:0099056	CC	integral component of presynaptic membrane	│ │ └─ integral component of presynaptic membrane	GO:0042734	3.99404e-10	7.98808e-10	KCNA2;SLC6A5;CNTNAP4;NRXN1;ADORA2A;GRIK1;GRIA1;GRIA3;GABBR1;SLC1A2;GRM3;LPAR1
GO:0043083	CC	synaptic cleft	├─ synaptic cleft	GO:0045202	1.7967e-05	2.48774e-05	APOE;LGI1;AGRN;SPARCL1
GO:0098794	CC	postsynapse	├─ postsynapse	GO:0045202	3.68614e-29	3.31753e-28	FLNA;CYFIP1;APC2;PFN1;JAK2;PSD2;EIF4EBP2;CALB1;PLAT;EIF4EBP1;PPP1R9A;SYNE1;SRGN;GABRA2;GABRB1;GABBR1;KCND2;GRASP;STAT3;MAPK1;FRMPD4;TNIK;ACTN2;LZTS1;DGKI;CNKSR2;ADAM22;GRIA1;SLC16A3;LRFN5;GRIA3;SLITRK1;CNTN1;FARP1;KCNA2;GRM5;CANX;NRP1;ADORA2A;GRM3;NRP2;ITGA5;LPAR1;ITPR1
GO:0099572	CC	postsynaptic specialization	│ ├─ postsynaptic specialization	GO:0098794	1.52045e-13	5.47362e-13	SRGN;GABRA2;GABRB1;GABBR1;KCND2;GRASP;STAT3;PPP1R9A;MAPK1;FRMPD4;TNIK;ACTN2;LZTS1;DGKI;CNKSR2;ADAM22;GRIA1;SLC16A3;LRFN5;GRIA3;SLITRK1
GO:0099060	CC	integral component of postsynaptic specialization membrane	│ │ │ └─ integral component of postsynaptic specialization membrane	GO:0099634	0.000472324	0.000566789	GABRA2;GABRB1;GABBR1;KCND2
GO:0014069	CC	postsynaptic density	│ │ ├─ postsynaptic density	GO:0099572	3.34021e-10	7.51548e-10	GRASP;STAT3;PPP1R9A;MAPK1;FRMPD4;TNIK;ACTN2;LZTS1;DGKI;CNKSR2;ADAM22;GRIA1;SLC16A3;LRFN5;GRIA3;SLITRK1
GO:0098839	CC	postsynaptic density membrane	│ │ │ └─ postsynaptic density membrane	GO:0014069	2.25193e-08	3.68498e-08	ACTN2;LZTS1;DGKI;CNKSR2;ADAM22;GRIA1;SLC16A3;LRFN5;GRIA3;SLITRK1
GO:0045211	CC	postsynaptic membrane	│ ├─ postsynaptic membrane	GO:0098794	6.63038e-14	2.98367e-13	CNTN1;FARP1;KCNA2;GRM5;CANX;NRP1;ADORA2A;GRIA1;GRIA3;GRM3;GABBR1;NRP2;KCND2;ITGA5;LPAR1
GO:0099055	CC	integral component of postsynaptic membrane	│ │ └─ integral component of postsynaptic membrane	GO:0045211	3.07892e-12	9.23676e-12	KCNA2;GRM5;CANX;NRP1;ADORA2A;GRIA1;GRIA3;GRM3;GABBR1;NRP2;KCND2;ITGA5;LPAR1
SYNGO:synprocess	BP	process in the synapse	process in the synapse		1.27276e-44	3.1819e-43	CALB1;GRIK1;GRIA1;GRIA3;GABRA2;GABRB1;KCNA2;GABBR1;NSF;NRXN1;SYNGR2;RAB3B;LPAR1;UNC13C;UNC13B;DOC2A;PRKCB;CANX;SLC6A5;SLC1A2;ITPR1;KCND2;ADAM22;LGI1;TNIK;SYNE1;PLCB1;IL1RAP;FARP1;PLAT;STAT3;JAK2;PPP1R9A;SRGN;GRM5;TNR;NTNG2;NRG3;CNTNAP4;PFN1;ADORA2A;ADORA2B;CHRNA5;DGKI;FLNA;NRP1;CNKSR2;NRP2;CYFIP1;AGRN;SPARC;APOE;SPARCL1;SLITRK4;SLITRK1;EFNA5;LRFN5;LZTS1;FRMPD4;SLC16A3;EIF4EBP1;RAB21;GRASP
SYNGO:presynprocess	BP	process in the presynapse	├─ process in the presynapse	SYNGO:synprocess	2.66982e-14	1.66864e-13	CALB1;GRIK1;GRIA1;GRIA3;GABRA2;GABRB1;KCNA2;GABBR1;NSF;NRXN1;SYNGR2;RAB3B;LPAR1;UNC13C;UNC13B;DOC2A;PRKCB;CANX;SLC6A5;SLC1A2
GO:0099505	BP	regulation of presynaptic membrane potential	│ ├─ regulation of presynaptic membrane potential	SYNGO:presynprocess	1.09152e-07	2.48072e-07	GRIK1;GRIA1;GRIA3;GABRA2;GABRB1;KCNA2;GABBR1
GO:0099507	BP	ligand-gated ion channel activity involved in regulation of presynaptic membrane potential	│ │ ├─ ligand-gated ion channel activity involved in regulation of presynaptic membrane potential	GO:0099505	2.72957e-06	4.54929e-06	GRIK1;GRIA1;GRIA3;GABRA2;GABRB1
GO:0099504	BP	synaptic vesicle cycle	│ ├─ synaptic vesicle cycle	SYNGO:presynprocess	2.18161e-06	3.89573e-06	NSF;NRXN1;SYNGR2;RAB3B;LPAR1;UNC13C;UNC13B;DOC2A;PRKCB;CANX
GO:0098693	BP	regulation of synaptic vesicle cycle	│ │ ├─ regulation of synaptic vesicle cycle	GO:0099504	1.7967e-05	2.80734e-05	NRXN1;SYNGR2;RAB3B;LPAR1
GO:0016079	BP	synaptic vesicle exocytosis	│ │ ├─ synaptic vesicle exocytosis	GO:0099504	0.00289776	0.00314974	UNC13C;UNC13B;DOC2A;PRKCB
SYNGO:postsynprocess	BP	process in the postsynapse	├─ process in the postsynapse	SYNGO:synprocess	5.29195e-11	2.20498e-10	CALB1;ITPR1;GABBR1;GABRA2;GABRB1;GRIA1;GRIA3;GRIK1;KCNA2;KCND2;ADAM22;LGI1;TNIK;SYNE1;LPAR1
GO:0060078	BP	regulation of postsynaptic membrane potential	│ ├─ regulation of postsynaptic membrane potential	SYNGO:postsynprocess	3.52489e-08	9.79137e-08	GABBR1;GABRA2;GABRB1;GRIA1;GRIA3;GRIK1;KCNA2;KCND2
GO:1904315	BP	transmitter-gated ion channel activity involved in regulation of postsynaptic membrane potential	│ │ ├─ transmitter-gated ion channel activity involved in regulation of postsynaptic membrane potential	GO:0060078	4.17588e-05	6.141e-05	GABRA2;GABRB1;GRIA1;GRIA3;GRIK1
GO:0099072	BP	regulation of postsynaptic membrane neurotransmitter receptor levels	│ ├─ regulation of postsynaptic membrane neurotransmitter receptor levels	SYNGO:postsynprocess	0.00169909	0.00212387	ADAM22;LGI1;TNIK;SYNE1;LPAR1
GO:0099645	BP	neurotransmitter receptor localization to postsynaptic specialization membrane	│ │ ├─ neurotransmitter receptor localization to postsynaptic specialization membrane	GO:0099072	0.00573179	0.00597061	ADAM22;LGI1;TNIK
GO:0099537	BP	trans-synaptic signaling	│ ├─ trans-synaptic signaling	GO:0099536	5.86035e-16	4.88363e-15	PLCB1;NRXN1;IL1RAP;FARP1;PLAT;STAT3;JAK2;PPP1R9A;SRGN;GRM5;TNR;NTNG2;NRG3;CNTNAP4;PFN1;ADORA2A;ADORA2B;CHRNA5;DGKI
GO:0007268	BP	chemical synaptic transmission	│ │ └─ chemical synaptic transmission	GO:0099537	2.06573e-12	1.03287e-11	STAT3;JAK2;PPP1R9A;SRGN;GRM5;TNR;NTNG2;NRG3;CNTNAP4;PFN1;ADORA2A;ADORA2B;CHRNA5;DGKI;PLCB1
GO:0050804	BP	modulation of chemical synaptic transmission	│ │ ├─ modulation of chemical synaptic transmission	GO:0007268	3.22169e-09	1.1506e-08	STAT3;JAK2;PPP1R9A;SRGN;GRM5;TNR;NTNG2;NRG3;CNTNAP4;PFN1
GO:0099171	BP	presynaptic modulation of chemical synaptic transmission	│ │ │ └─ presynaptic modulation of chemical synaptic transmission	GO:0099531	0.000472324	0.000656005	ADORA2A;ADORA2B;CHRNA5;DGKI
GO:0050808	BP	synapse organization	├─ synapse organization	SYNGO:synprocess	4.38517e-16	4.88363e-15	FLNA;NRP1;CNKSR2;NRP2;SRGN;PFN1;CYFIP1;AGRN;CNTNAP4;SPARC;APOE;SPARCL1;SLITRK4;SLITRK1;IL1RAP;EFNA5;LRFN5;NTNG2;NRXN1;FARP1;LZTS1;PPP1R9A;FRMPD4
GO:0099173	BP	postsynapse organization	│ ├─ postsynapse organization	GO:0050808	0.00261916	0.00311805	NRP1;CNKSR2;NRP2;SRGN
GO:0050807	BP	regulation of synapse organization	│ ├─ regulation of synapse organization	GO:0050808	1.34189e-08	4.19341e-08	AGRN;CNTNAP4;SPARC;APOE;SPARCL1;SLITRK4;SLITRK1
GO:0099560	BP	synapse adhesion between pre- and post-synapse	│ ├─ synapse adhesion between pre- and post-synapse	GO:0050808	5.83625e-08	1.45906e-07	SPARCL1;IL1RAP;EFNA5;LRFN5;NTNG2;SLITRK1;NRXN1
GO:0051963	BP	regulation of synapse assembly	│ │ ├─ regulation of synapse assembly	GO:0007416	1.9305e-07	4.02188e-07	IL1RAP;FARP1;LRFN5;SLITRK1;NRXN1;NTNG2;LZTS1
GO:1905606	BP	regulation of presynapse assembly	│ │ │ ├─ regulation of presynapse assembly	GO:0051963	4.02043e-07	7.7316e-07	IL1RAP;FARP1;LRFN5;SLITRK1;NRXN1;NTNG2
GO:0098698	BP	postsynaptic specialization assembly	│ │ ├─ postsynaptic specialization assembly	GO:0007416	0.00280381	0.00314974	NTNG2;NRXN1;IL1RAP
GO:0098974	BP	postsynaptic actin cytoskeleton organization	│ ├─ postsynaptic actin cytoskeleton organization	GO:0099188	0.000618868	0.0008143	PPP1R9A;FARP1;FRMPD4

## Sheet: Spinal cord_9dpi
GO term ID	GO domain	GO term name	GO term name - hierarchical structure	GO parent term ID	GSEA p-value	GSEA 'gene cluster' FDR corrected p-value	genes - hgnc_symbol
GO:0045202	CC	synapse	synapse		2.22694e-114	7.12622e-113	PPFIA2;ADORA2B;SH3GL1;CORO1A;CDH13;USP46;CDH8;SYT6;GHSR;FBXO45;BACE1;UNC13C;CADPS;UNC13B;SYNJ1;NAPA;SYNJ2;PFN1;PPP1R9A;DNM3;HSPA8;STON2;TNIK;PTN;HIP1;AAK1;VPS35;ADD3;RGS7BP;ARFGEF2;GRK2;GAD1;CNTN6;ITGA2;PTK2B;CTBP2;NSF;ANKS1B;LRRK2;NEFL;UNC13A;PCLO;RIMBP2;RIMS2;ERC2;CTNNA2;NTNG1;DGKI;GRIA2;GRIA1;GRIA4;GABRB1;GRIN2B;KCNMA1;CACNA1D;GABBR1;SYT11;NRG1;ITGA3;GRIA3;CLTC;DNM1L;SNAP29;RPH3A;SLC18A2;SLC17…
GO:0097060	CC	synaptic membrane	├─ synaptic membrane	GO:0045202	0.00569071	0.00607009	CDH8;SYT6;GHSR
GO:0098793	CC	presynapse	├─ presynapse	GO:0045202	3.93376e-52	4.19601e-51	FBXO45;BACE1;UNC13C;CADPS;UNC13B;SYNJ1;NAPA;SYNJ2;PFN1;PPP1R9A;DNM3;HSPA8;STON2;TNIK;PTN;HIP1;AAK1;VPS35;ADD3;RGS7BP;SH3GL1;ARFGEF2;GRK2;GAD1;CNTN6;ITGA2;PTK2B;CTBP2;NSF;ANKS1B;LRRK2;PPFIA2;NEFL;UNC13A;PCLO;RIMBP2;RIMS2;ERC2;CTNNA2;NTNG1;DGKI;GRIA2;GRIA1;GRIA4;GABRB1;GRIN2B;KCNMA1;CACNA1D;GABBR1;SYT11;NRG1;ITGA3;GRIA3;CLTC;DNM1L;SNAP29;RPH3A;SLC18A2;SLC17A6;SLC17A8;SLC6A2;OPRK1;SYT1;STXBP5L;SNAP2…
GO:0099523	CC	presynaptic cytosol	│ ├─ presynaptic cytosol	GO:0098793	5.20342e-05	7.07198e-05	CTBP2;NSF;FBXO45;ANKS1B;LRRK2;PPFIA2
GO:0048786	CC	presynaptic active zone	│ ├─ presynaptic active zone	GO:0098793	5.69576e-16	1.51887e-15	UNC13A;CTBP2;PCLO;RIMBP2;RIMS2;ERC2;CTNNA2;NAPA;NTNG1;DGKI;GRIA2;GRIA1;GRIA4;GABRB1;GRIN2B;KCNMA1;CACNA1D;GABBR1;SYT11;NRG1;ITGA3;GRIA3
GO:0098831	CC	presynaptic active zone cytoplasmic component	│ │ ├─ presynaptic active zone cytoplasmic component	GO:0048786	1.22238e-05	2.17312e-05	CTBP2;PCLO;RIMBP2;RIMS2;ERC2;CTNNA2
GO:0048787	CC	presynaptic active zone membrane	│ │ └─ presynaptic active zone membrane	GO:0048786	1.32139e-11	3.25265e-11	NAPA;NTNG1;DGKI;GRIA2;GRIA1;GRIA4;GABRB1;GRIN2B;KCNMA1;CACNA1D;GABBR1;SYT11;NRG1;ITGA3;GRIA3
GO:0099059	CC	integral component of presynaptic active zone membrane	│ │ └─ integral component of presynaptic active zone membrane	GO:0048787	1.58254e-09	3.61722e-09	GRIA2;GRIA1;GRIA4;GABRB1;GRIN2B;KCNMA1;CACNA1D;GABBR1;SYT11;NRG1;ITGA3;GRIA3
GO:0098833	CC	presynaptic endocytic zone	│ ├─ presynaptic endocytic zone	GO:0098793	0.00665527	0.00686995	VPS35;CLTC;DNM1L
GO:0008021	CC	synaptic vesicle	│ ├─ synaptic vesicle	GO:0098793	3.97952e-05	6.06403e-05	DGKI;SNAP29;DNM1L;RPH3A;SLC18A2;SLC17A6;SLC17A8;SLC6A2;OPRK1;SYT1;SYT11
GO:0030672	CC	synaptic vesicle membrane	│ │ └─ synaptic vesicle membrane	GO:0008021	0.000111088	0.000131659	DNM1L;RPH3A;SLC18A2;SLC17A6;SLC17A8;SLC6A2;OPRK1;SYT1;SYT11
GO:0030285	CC	integral component of synaptic vesicle membrane	│ │ └─ integral component of synaptic vesicle membrane	GO:0030672	8.11477e-05	9.98741e-05	SLC18A2;SLC17A6;SLC17A8;SLC6A2;OPRK1;SYT1;SYT11
GO:0098992	CC	neuronal dense core vesicle	│ ├─ neuronal dense core vesicle	GO:0098793	0.00402674	0.0044433	SLC18A2;STXBP5L;CADPS
GO:0042734	CC	presynaptic membrane	│ ├─ presynaptic membrane	GO:0098793	1.25574e-21	4.46485e-21	SNAP25;CNTN1;CNTN6;RGS7BP;CTNNA2;KCNA1;KCNA2;EPHB2;CADM1;SLC6A5;EFNB1;CNTNAP4;SCN2A;ADAM23;SLC6A2;OPRK1;NRXN1;ADORA2A;PCDH17;GRIK1;GRIK5;GRIA2;GABBR1;GABRA5;GRIN2B;ERBB4;SLC1A2;GABBR2;PTPRD;CHRM3;LPAR1
GO:0099026	CC	anchored component of presynaptic membrane	│ │ ├─ anchored component of presynaptic membrane	GO:0042734	5.30399e-05	7.07198e-05	SNAP25;CNTN1;CNTN6;RGS7BP
GO:0099056	CC	integral component of presynaptic membrane	│ │ └─ integral component of presynaptic membrane	GO:0042734	8.79637e-18	2.55894e-17	KCNA1;KCNA2;EPHB2;CADM1;SLC6A5;EFNB1;CNTNAP4;SCN2A;ADAM23;SLC6A2;OPRK1;NRXN1;ADORA2A;PCDH17;GRIK1;GRIK5;GRIA2;GABBR1;GABRA5;GRIN2B;ERBB4;SLC1A2;GABBR2;PTPRD;CHRM3;LPAR1
GO:0043083	CC	synaptic cleft	├─ synaptic cleft	GO:0045202	2.82857e-07	5.65713e-07	APOE;LGI1;LAMA5;LAMA2;NPTX2;C1QL1;SPARCL1
GO:0098794	CC	postsynapse	├─ postsynapse	GO:0045202	3.36106e-81	5.37769e-80	GRIP1;FLNA;ADAM10;CPEB3;ELAVL1;SLC18A2;FXR1;NAPA;PFN1;CAPRIN1;CPEB4;PSD2;EIF4B;EIF4EBP2;SPTBN1;PTN;PTK2;PTK2B;SYT11;ADD3;VPS35;FZD9;RGS7BP;HSPA8;ARFGEF2;DOCK10;MYO5A;NRG1;FBXO45;HOMER1;EIF4EBP1;NEFL;CTTNBP2;ABI2;MYH10;SYNE1;SYNPO;DLGAP4;DMD;SRGN;NPTX2;GABRA5;GABRB1;CHRNB1;GABRB3;GABBR1;KCND2;KCND3;NLGN1;NLGN4Y;PAK2;SHANK2;KPNA1;ANKS1B;STAT3;PPP1R9A;PLCB4;GSK3B;USP8;RAPGEF4;MPDZ;GRK2;CTNNA2;TNIK;D…
GO:0099524	CC	postsynaptic cytosol	│ ├─ postsynaptic cytosol	GO:0098794	0.0160538	0.0160538	FBXO45;HOMER1;EIF4EBP1
GO:0099571	CC	postsynaptic cytoskeleton	│ ├─ postsynaptic cytoskeleton	GO:0098794	1.54438e-05	2.60106e-05	NEFL;CTTNBP2;ABI2;MYO5A;MYH10;SYNE1
GO:0098871	CC	postsynaptic actin cytoskeleton	│ │ ├─ postsynaptic actin cytoskeleton	GO:0099571	5.71635e-05	7.31693e-05	CTTNBP2;ABI2;MYO5A;MYH10;SYNE1
GO:0099572	CC	postsynaptic specialization	│ ├─ postsynaptic specialization	GO:0098794	5.57022e-45	4.45618e-44	DLGAP4;DMD;SRGN;HSPA8;NPTX2;GABRA5;GABRB1;CHRNB1;GABRB3;GABBR1;KCND2;KCND3;NLGN1;NLGN4Y;HOMER1;PAK2;SHANK2;KPNA1;ANKS1B;STAT3;PPP1R9A;PLCB4;GSK3B;USP8;GRIP1;RAPGEF4;MPDZ;GRK2;CTNNA2;TNIK;DLG1;DNM2;SH3GL1;PTK2B;RGS7BP;LZTS1;TIAM1;DGKI;DGKB;CNKSR2;ATP2B2;GRM1;ADCY1;ADAM22;IL1RAPL1;LRRTM3;GRIA1;GRIK5;GRIA2;GRIN2B;DCC;SLC16A3;ERBB4;RTN4;GRID1;LRRC7;PTPRZ1;SHISA6;GRIA3;GRIA4;CHRM3;SLITRK1;NRCAM;GRIN3A…
GO:0099634	CC	postsynaptic specialization membrane	│ │ ├─ postsynaptic specialization membrane	GO:0099572	1.66396e-08	3.54978e-08	HSPA8;NPTX2;GABRA5;GABRB1;CHRNB1;GABRB3;GABBR1;KCND2;KCND3;NLGN1;NLGN4Y
GO:0099060	CC	integral component of postsynaptic specialization membrane	│ │ │ └─ integral component of postsynaptic specialization membrane	GO:0099634	7.48276e-07	1.40852e-06	GABRA5;GABRB1;CHRNB1;GABRB3;GABBR1;KCND2;KCND3;NLGN1;NLGN4Y
GO:0014069	CC	postsynaptic density	│ │ ├─ postsynaptic density	GO:0099572	2.70466e-35	1.73098e-34	HOMER1;PAK2;SHANK2;KPNA1;ANKS1B;STAT3;PPP1R9A;PLCB4;GSK3B;USP8;HSPA8;GRIP1;RAPGEF4;MPDZ;GRK2;CTNNA2;TNIK;DLG1;DNM2;SH3GL1;PTK2B;RGS7BP;LZTS1;TIAM1;DGKI;DGKB;CNKSR2;ATP2B2;GRM1;ADCY1;ADAM22;IL1RAPL1;LRRTM3;GRIA1;GRIK5;GRIA2;GRIN2B;DCC;SLC16A3;ERBB4;RTN4;GRID1;LRRC7;PTPRZ1;SHISA6;GRIA3;GRIA4;CHRM3;SLITRK1;NRCAM;GRIN3A;NRG1;ADGRB3;ITGA8
GO:0099092	CC	postsynaptic density, intracellular component	│ │ │ ├─ postsynaptic density, intracellular component	GO:0014069	3.53806e-05	5.6609e-05	CTNNA2;ANKS1B;TNIK;DLG1;DNM2;SH3GL1;PTK2B
GO:0098839	CC	postsynaptic density membrane	│ │ │ └─ postsynaptic density membrane	GO:0014069	2.41749e-26	1.28933e-25	RGS7BP;LZTS1;TIAM1;DGKI;DGKB;CNKSR2;ATP2B2;GRM1;ADCY1;ADAM22;IL1RAPL1;LRRTM3;GRIA1;GRIK5;GRIA2;GRIN2B;DCC;SLC16A3;ERBB4;RTN4;GRID1;LRRC7;PTPRZ1;SHISA6;GRIA3;GRIA4;CHRM3;SLITRK1;NRCAM;GRIN3A;NRG1;ADGRB3;ITGA8
GO:0099147	CC	extrinsic component of postsynaptic density membrane	│ │ │ ├─ extrinsic component of postsynaptic density membrane	GO:0098839	5.30399e-05	7.07198e-05	TIAM1;DGKI;DGKB;CNKSR2
GO:0099061	CC	integral component of postsynaptic density membrane	│ │ │ └─ integral component of postsynaptic density membrane	GO:0098839	7.95707e-22	3.18283e-21	ATP2B2;GRM1;ADCY1;ADAM22;IL1RAPL1;LRRTM3;GRIA1;GRIK5;GRIA2;GRIN2B;DCC;SLC16A3;ERBB4;RTN4;GRID1;LRRC7;PTPRZ1;SHISA6;GRIA3;GRIA4;CHRM3;SLITRK1;NRCAM;GRIN3A;NRG1;ADGRB3;ITGA8
GO:0045211	CC	postsynaptic membrane	│ ├─ postsynaptic membrane	GO:0098794	2.46056e-22	1.12483e-21	HIP1;CNTN1;TENM2;CTNNA2;ATP2B2;KCNA1;KCNA2;GRM5;CADM1;EPHB2;NRP1;SLC6A6;SLC8A1;OPRK1;ADORA2A;PCDH17;GRM1;GABBR1;GABBR2;NRP2;NTRK3;NRCAM;ABHD6;GABRA5;FLRT3;KCND2;GABRB3;ITGA3;ITGA5;LPAR1
GO:0099055	CC	integral component of postsynaptic membrane	│ │ └─ integral component of postsynaptic membrane	GO:0045211	1.4329e-19	4.58529e-19	ATP2B2;KCNA1;KCNA2;GRM5;CADM1;EPHB2;NRP1;SLC6A6;SLC8A1;OPRK1;ADORA2A;PCDH17;GRM1;GABBR1;GABBR2;NRP2;NTRK3;NRCAM;ABHD6;GABRA5;FLRT3;KCND2;GABRB3;ITGA3;ITGA5;LPAR1
SYNGO:postsyn_ser	CC	postsynaptic SER	│ └─ postsynaptic SER	SYNGO:postsyn_er	0.000289059	0.000330353	PLCB4;PSEN1;ITPR1
SYNGO:synprocess	BP	process in the synapse	process in the synapse		2.49658e-89	1.29822e-87	SV2B;ERC2;RIMBP2;CACNA1D;CACNB4;GABRB1;NRXN1;SYNGR2;SNAP29;RAPGEF4;LPAR1;PCLO;ABI2;RAB35;SNAP25;UNC13C;UNC13A;UNC13B;SYT1;RIMS2;PPFIA2;STXBP5L;FBXO45;CTBP2;NAPA;CADPS;RPH3A;SLC18A2;CLTC;DNM3;DNM2;STON2;DNM1L;LRRK2;VPS35;SYT11;SYNJ1;SLC6A5;SLC6A2;SLC1A2;SYNPO;MYO5A;ITPR1;RGS7BP;GABBR1;CHRNB1;GABRB3;GRIA1;GRIA2;GRIA3;GRIA4;GRIK1;GRIK2;GRIN3A;DLGAP2;SHISA6;NPTX2;LGI1;DLG1;ERBB4;TNIK;GSK3B;PAK2;NEDD4…
SYNGO:presynprocess	BP	process in the presynapse	├─ process in the presynapse	SYNGO:synprocess	2.86335e-22	4.96315e-21	SV2B;ERC2;RIMBP2;CACNA1D;CACNB4;GABRB1;NRXN1;SYNGR2;SNAP29;RAPGEF4;LPAR1;PCLO;ABI2;RAB35;SNAP25;UNC13C;UNC13A;UNC13B;SYT1;RIMS2;PPFIA2;STXBP5L;FBXO45;CTBP2;NAPA;CADPS;RPH3A;SLC18A2;CLTC;DNM3;DNM2;STON2;DNM1L;LRRK2;VPS35;SYT11;SYNJ1;SLC6A5;SLC6A2;SLC1A2
GO:0099509	BP	regulation of presynaptic cytosolic calcium levels	│ ├─ regulation of presynaptic cytosolic calcium levels	SYNGO:presynprocess	0.000543738	0.000724984	SV2B;ERC2;RIMBP2;CACNA1D;CACNB4
GO:0099626	BP	voltage-gated calcium channel activity involved in regulation of presynaptic cytosolic calcium levels	│ │ └─ voltage-gated calcium channel activity involved in regulation of presynaptic cytosolic calcium levels	GO:0099509	0.00168211	0.00198794	RIMBP2;CACNA1D;CACNB4
GO:0099504	BP	synaptic vesicle cycle	│ ├─ synaptic vesicle cycle	SYNGO:presynprocess	4.25535e-22	5.53195e-21	NRXN1;SYNGR2;SNAP29;RAPGEF4;LPAR1;PCLO;ABI2;RAB35;SNAP25;UNC13C;UNC13A;UNC13B;SYT1;RIMS2;RIMBP2;ERC2;PPFIA2;STXBP5L;CACNB4;FBXO45;SV2B;CTBP2;NAPA;CADPS;RPH3A;SLC18A2;CLTC;DNM3;DNM2;STON2;DNM1L;LRRK2;VPS35;SYT11;SYNJ1
GO:0098693	BP	regulation of synaptic vesicle cycle	│ │ ├─ regulation of synaptic vesicle cycle	GO:0099504	5.71635e-05	9.58872e-05	NRXN1;SYNGR2;SNAP29;RAPGEF4;LPAR1
GO:0016079	BP	synaptic vesicle exocytosis	│ │ ├─ synaptic vesicle exocytosis	GO:0099504	1.69208e-13	9.77649e-13	SNAP25;UNC13C;UNC13A;UNC13B;SYT1;RIMS2;RIMBP2;ERC2;PPFIA2;STXBP5L;CACNB4;FBXO45;SV2B;SNAP29;CTBP2;NAPA;CADPS;RPH3A
GO:0099502	BP	calcium-dependent activation of synaptic vesicle fusion	│ │ │ ├─ calcium-dependent activation of synaptic vesicle fusion	GO:0016079	0.000346657	0.000474373	SYT1;RIMS2;RIMBP2;ERC2
GO:0150037	BP	regulation of calcium-dependent activation of synaptic vesicle fusion	│ │ │ │ └─ regulation of calcium-dependent activation of synaptic vesicle fusion	GO:0099502	0.000946207	0.00123007	RIMS2;RIMBP2;ERC2
GO:2000300	BP	regulation of synaptic vesicle exocytosis	│ │ │ ├─ regulation of synaptic vesicle exocytosis	GO:0016079	0.000118869	0.0001818	PPFIA2;STXBP5L;CACNB4;FBXO45;SV2B;SNAP29
GO:0016082	BP	synaptic vesicle priming	│ │ │ └─ synaptic vesicle priming	GO:0016079	2.53323e-05	4.87881e-05	NAPA;RIMS2;ERC2;CADPS;RPH3A
GO:0048488	BP	synaptic vesicle endocytosis	│ │ └─ synaptic vesicle endocytosis	GO:0099504	2.36494e-06	6.14884e-06	CLTC;DNM3;DNM2;STON2;DNM1L;LRRK2;VPS35;SYT11;SYNJ1
GO:1900242	BP	regulation of synaptic vesicle endocytosis	│ │ ├─ regulation of synaptic vesicle endocytosis	GO:0048488	0.00569071	0.00603912	LRRK2;VPS35;SYT11
SYNGO:postsynprocess	BP	process in the postsynapse	├─ process in the postsynapse	SYNGO:synprocess	7.3165e-18	5.43511e-17	SYNPO;MYO5A;ITPR1;RGS7BP;GABBR1;CHRNB1;GABRB3;GRIA1;GRIA2;GRIA3;GRIA4;GRIK1;GRIK2;GRIN3A;DLGAP2;SHISA6;NPTX2;LGI1;DLG1;ERBB4;TNIK;GSK3B;PAK2;RAPGEF4;NEDD4;SYNE1;SYNJ1;USP46;HIP1;LPAR1;SYT6
GO:0099566	BP	regulation of postsynaptic cytosolic calcium levels	│ ├─ regulation of postsynaptic cytosolic calcium levels	SYNGO:postsynprocess	0.00269889	0.0029238	SYNPO;MYO5A;ITPR1
GO:0060078	BP	regulation of postsynaptic membrane potential	│ ├─ regulation of postsynaptic membrane potential	SYNGO:postsynprocess	8.46685e-08	2.75173e-07	RGS7BP;GABBR1;CHRNB1;GABRB3;GRIA1;GRIA2;GRIA3;GRIA4;GRIK1;GRIK2;GRIN3A
GO:1904315	BP	transmitter-gated ion channel activity involved in regulation of postsynaptic membrane potential	│ │ ├─ transmitter-gated ion channel activity involved in regulation of postsynaptic membrane potential	GO:0060078	1.05943e-06	2.8995e-06	CHRNB1;GABRB3;GRIA1;GRIA2;GRIA3;GRIA4;GRIK1;GRIK2;GRIN3A
GO:0099072	BP	regulation of postsynaptic membrane neurotransmitter receptor levels	│ ├─ regulation of postsynaptic membrane neurotransmitter receptor levels	SYNGO:postsynprocess	1.70814e-08	6.34453e-08	NPTX2;LGI1;DLG1;ERBB4;TNIK;GSK3B;PAK2;RAPGEF4;SHISA6;NEDD4;SYNE1;SYNJ1;USP46;HIP1;LPAR1
GO:0099645	BP	neurotransmitter receptor localization to postsynaptic specialization membrane	│ │ ├─ neurotransmitter receptor localization to postsynaptic specialization membrane	GO:0099072	7.83468e-06	1.69751e-05	NPTX2;LGI1;DLG1;ERBB4;TNIK;GSK3B;PAK2;RAPGEF4
GO:0098696	BP	regulation of neurotransmitter receptor localization to postsynaptic specialization membrane	│ │ │ └─ regulation of neurotransmitter receptor localization to postsynaptic specialization membrane	GO:0099645	0.00138046	0.0016694	TNIK;GSK3B;PAK2;RAPGEF4
GO:0099149	BP	regulation of postsynaptic neurotransmitter receptor endocytosis	│ │ └─ regulation of postsynaptic neurotransmitter receptor endocytosis	GO:0098884	5.20342e-05	9.33026e-05	NEDD4;SYNE1;SYNJ1;USP46;HIP1;LPAR1
GO:0099537	BP	trans-synaptic signaling	│ ├─ trans-synaptic signaling	GO:0099536	1.41269e-21	1.4692e-20	PLCB1;NRXN1;GUCY1A1;CADM1;FARP1;NTRK2;ADCY1;AKAP12;PLCB4;STAT3;PPP1R9A;SRGN;GRM5;SLC6A6;NTNG1;DGKB;DGKE;PTPRD;PTN;CNTNAP4;DLGAP2;PFN1;PAFAH1B1;ADORA2A;ADORA2B;BACE1;DGKI;GRIN3A;HIP1;ANKS1B;SYNPO;DCC;NEFL;PTK2B
GO:0007268	BP	chemical synaptic transmission	│ │ └─ chemical synaptic transmission	GO:0099537	1.28086e-18	1.11008e-17	ADCY1;AKAP12;PLCB4;STAT3;PPP1R9A;SRGN;GRM5;SLC6A6;NTNG1;DGKB;DGKE;PTPRD;PTN;CNTNAP4;DLGAP2;PFN1;PAFAH1B1;ADORA2A;ADORA2B;BACE1;DGKI;GRIN3A;HIP1;ANKS1B;SYNPO;PLCB1;DCC;NEFL;PTK2B
GO:0050804	BP	modulation of chemical synaptic transmission	│ │ ├─ modulation of chemical synaptic transmission	GO:0007268	1.62247e-11	8.43682e-11	ADCY1;AKAP12;PLCB4;STAT3;PPP1R9A;SRGN;GRM5;SLC6A6;NTNG1;DGKB;DGKE;PTPRD;PTN;CNTNAP4;DLGAP2;PFN1;PAFAH1B1
GO:0099171	BP	presynaptic modulation of chemical synaptic transmission	│ │ │ └─ presynaptic modulation of chemical synaptic transmission	GO:0099531	5.4428e-05	9.43419e-05	ADCY1;ADORA2A;ADORA2B;BACE1;DGKI;GRIN3A;HIP1
GO:0099565	BP	postsynaptic process involved in chemical synaptic transmission	│ │ └─ postsynaptic process involved in chemical synaptic transmission	GO:0007268	2.39316e-05	4.78632e-05	ANKS1B;SYNPO;PLCB1;DCC;NEFL;PTK2B
GO:0099170	BP	postsynaptic modulation of chemical synaptic transmission	│ │ └─ postsynaptic modulation of chemical synaptic transmission	GO:0099565	0.000204772	0.000288731	SYNPO;PLCB1;DCC;NEFL;PTK2B
GO:0050808	BP	synapse organization	├─ synapse organization	SYNGO:synprocess	1.74126e-46	4.52729e-45	FLNA;IQSEC3;CNKSR2;FZD9;ABI2;LAMA5;ITGA3;NRP2;SEMA3F;SRGN;SHANK2;DGKB;NRCAM;GRID1;RAPGEF4;ADAM10;PSEN1;NF1;TIAM1;PAFAH1B1;MYO9A;GSK3B;CTNNA2;PFN1;CTTNBP2;MYH10;PTK2;MECP2;CNTNAP4;SPARC;APOE;SPARCL1;CDH8;SLITRK4;SLITRK1;PPFIA2;PCLO;RIMBP2;RIMS2;ERC2;CTBP2;ACTN1;NEFL;DLG1;CADM1;PCDH17;FLRT3;PTPRD;NTNG1;NRG1;ERBB4;EFNB1;NRXN1;EPHB2;PPFIBP2;IL1RAP;LRRTM3;FARP1;APP;VPS35;LZTS1;NTRK3;PTK2B;ADGRB3;C1QL1…
GO:0099173	BP	postsynapse organization	│ ├─ postsynapse organization	GO:0050808	8.421e-16	5.47365e-15	IQSEC3;CNKSR2;FZD9;ABI2;LAMA5;ITGA3;NRP2;SEMA3F;SRGN;SHANK2;DGKB;NRCAM;GRID1;RAPGEF4;ADAM10;PSEN1;NF1;TIAM1;PAFAH1B1;MYO9A
GO:0099175	BP	regulation of postsynapse organization	│ │ ├─ regulation of postsynapse organization	GO:0099173	4.26399e-10	1.84773e-09	NRP2;SEMA3F;SRGN;SHANK2;DGKB;NRCAM;GRID1;RAPGEF4;ADAM10;PSEN1;NF1;TIAM1;PAFAH1B1
GO:0099010	BP	modification of postsynaptic structure	│ │ └─ modification of postsynaptic structure	GO:0099563	9.25404e-06	1.92484e-05	GSK3B;CTNNA2;PFN1;CTTNBP2;TIAM1;MYH10;PTK2
GO:0098885	BP	modification of postsynaptic actin cytoskeleton	│ │ └─ modification of postsynaptic actin cytoskeleton	GO:0099010	7.40084e-06	1.67323e-05	CTNNA2;PFN1;CTTNBP2;TIAM1;MYH10;PTK2
GO:1905274	BP	regulation of modification of postsynaptic actin cytoskeleton	│ │ └─ regulation of modification of postsynaptic actin cytoskeleton	GO:0098885	7.82626e-05	0.000127177	CTTNBP2;TIAM1;MYH10;PTK2
GO:0050807	BP	regulation of synapse organization	│ ├─ regulation of synapse organization	GO:0050808	6.06136e-08	2.10127e-07	CTTNBP2;MECP2;CNTNAP4;SPARC;APOE;SPARCL1;CDH8;SLITRK4;SLITRK1
GO:0098918	BP	structural constituent of synapse	│ ├─ structural constituent of synapse	GO:0050808	1.33276e-08	5.33103e-08	PPFIA2;PCLO;RIMBP2;RIMS2;ERC2;CTBP2;ACTN1;NEFL;SHANK2;DLG1
GO:0099181	BP	structural constituent of presynapse	│ │ ├─ structural constituent of presynapse	GO:0098918	5.06632e-07	1.4636e-06	PPFIA2;PCLO;RIMBP2;RIMS2;ERC2;CTBP2
GO:0098882	BP	structural constituent of active zone	│ │ │ ├─ structural constituent of active zone	GO:0099181	4.14453e-06	9.79617e-06	PCLO;RIMBP2;RIMS2;ERC2;CTBP2
GO:0099186	BP	structural constituent of postsynapse	│ │ └─ structural constituent of postsynapse	GO:0098918	0.0021713	0.00240229	ACTN1;NEFL;SHANK2;DLG1
GO:0099560	BP	synapse adhesion between pre- and post-synapse	│ ├─ synapse adhesion between pre- and post-synapse	GO:0050808	3.44243e-06	8.5241e-06	SPARCL1;CADM1;PCDH17;FLRT3;PTPRD;NTNG1;NRG1;ITGA3
GO:0007416	BP	synapse assembly	│ ├─ synapse assembly	GO:0050808	3.71165e-11	1.7546e-10	CADM1;ERBB4;EFNB1;PPFIA2;NRXN1;EPHB2;PPFIBP2;IL1RAP;LRRTM3;NRG1;FARP1;APP;SLITRK1;VPS35;LZTS1;NTRK3;PTK2B
GO:0099054	BP	presynapse assembly	│ │ ├─ presynapse assembly	GO:0007416	0.00771116	0.0080196	EFNB1;PPFIA2;NRXN1
GO:0051963	BP	regulation of synapse assembly	│ │ ├─ regulation of synapse assembly	GO:0007416	1.63007e-07	4.98609e-07	EPHB2;PPFIBP2;IL1RAP;LRRTM3;NRG1;FARP1;APP;SLITRK1;VPS35;LZTS1
GO:1905606	BP	regulation of presynapse assembly	│ │ │ ├─ regulation of presynapse assembly	GO:0051963	8.68427e-05	0.000136843	IL1RAP;LRRTM3;NRG1;FARP1;APP;SLITRK1
GO:0097107	BP	postsynaptic density assembly	│ │ │ └─ postsynaptic density assembly	GO:0098698	0.0101042	0.0103023	NTRK3;IL1RAP;PTK2B
GO:0060074	BP	synapse maturation	│ ├─ synapse maturation	GO:0050808	3.37979e-05	6.27676e-05	PFN1;NEFL;PAK2;ADGRB3;VPS35
GO:0090128	BP	regulation of synapse maturation	│ │ └─ regulation of synapse maturation	GO:0060074	0.000205443	0.000288731	NEFL;PAK2;ADGRB3;VPS35
GO:0099188	BP	postsynaptic cytoskeleton organization	│ └─ postsynaptic cytoskeleton organization	GO:0050808	0.000204772	0.000288731	ARF1;ABI2;FARP1;MYH10;TENM2
GO:0098974	BP	postsynaptic actin cytoskeleton organization	│ ├─ postsynaptic actin cytoskeleton organization	GO:0099188	0.000981827	0.00124524	ARF1;ABI2;FARP1;MYH10
SYNGO:metabolism	BP	metabolism	├─ metabolism	SYNGO:synprocess	0.01689	0.01689	SLC16A3;NEDD4;USP8;EIF4EBP1;ADAM10;PSEN1
SYNGO:catabolic_postsynapse	BP	protein catabolic process at postsynapse	│ │ └─ protein catabolic process at postsynapse	SYNGO:catabolic_synapse	0.00215338	0.00240229	ADAM10;PSEN1;NEDD4
SYNGO:transport	BP	transport	└─ transport	SYNGO:synprocess	0.00119177	0.00147552	SLC6A6;MYO5A;GRIP1;VPS35;GRASP
GO:0098887	BP	neurotransmitter receptor transport, endosome to postsynaptic membrane	│ └─ neurotransmitter receptor transport, endosome to postsynaptic membrane	GO:0099639	0.00215338	0.00240229	GRIP1;VPS35;GRASP
