# Supplementary material for: Virus infection of the CNS disrupts the immune-neural-synaptic axis via induction of pleiotropic gene regulation of host responses
Source: eLife. 2021 Feb 18;10:e62273. doi: 10.7554/eLife.62273 (PMC7891934; doi:10.7554/eLife.62273)
Supplement: Supplementary file 4. [file elife-62273-supp4.xlsx]

## Sheet: CB_GOs_Syn-UP
Cerebellum; 7 dpi; Upregulated genes					Cerebellum; 9 dpi; Upregulated genes
Cellular Component ontology terms	Gene number	p-value	Q-value		Cellular Component ontology terms	Gene number	p-value	Q-value
synapse	8	2.38e-05	7.13e-05		synapse	30	1.56e-20	1.09e-19
postsynapse	6	0.000101	0.000152		postsynapse	19	4.04e-13	1.41e-12
postsynaptic specialization	3	0.00729	0.00729		integral component of postsynaptic membrane	6	1.75e-06	4.08e-06
Biological process ontology terms	Gene number	p-value	Q-value		postsynaptic specialization	7	0.000137	0.00024
process in the synapse	6	0.000486	0.000486		presynaptic active zone membrane	3	0.00136	0.0019
					presynapse	7	0.00204	0.00224
					postsynaptic density	5	0.00224	0.00224
					Biological process ontology terms	Gene number	p-value	Q-value
					process in the synapse	23	5.9e-15	5.9e-14
					trans-synaptic signaling	10	8.49e-10	4.25e-09
					synapse organization	11	9.52e-09	3.17e-08
					chemical synaptic transmission	8	7.16e-08	1.79e-07
					modulation of chemical synaptic transmission	5	1.65e-05	3.3e-05
					presynaptic modulation of chemical synaptic transmission	3	0.000576	0.00096
					regulation of synapse assembly	3	0.000744	0.00106
					postsynapse organization	3	0.00222	0.00278
					metabolism	3	0.00542	0.00602

## Sheet: CB_GOs_Syn-DOWN
Cerebellum; 7 dpi; Downregulated genes					Cerebellum; 9 dpi; Downregulated genes
Cellular Component ontology terms	Gene number	p-value	Q-value		Cellular Component ontology terms	Gene number	p-value	Q-value
presynapse	3	0.000353	0.000353		synapse	43	1.45e-33	2.32e-32
Biological process ontology terms	Gene number	p-value	Q-value		presynapse	25	2.83e-20	2.27e-19
igand-gated ion channel activity involved in regulation of presynaptic membrane potential	1	not significant	not significant		postsynapse	25	3.52e-18	1.88e-17
transmitter-gated ion channel activity involved in regulation of postsynaptic membrane potential	1	not significant	not significant		presynaptic membrane	12	7.26e-13	2.91e-12
					postsynaptic specialization	14	6.26e-11	2e-10
					integral component of presynaptic membrane	10	1.23e-10	3.27e-10
					postsynaptic membrane	9	1.8e-09	4.11e-09
					postsynaptic density	11	1.13e-08	2.26e-08
					postsynaptic density membrane	8	2.19e-08	3.9e-08
					presynaptic active zone membrane	6	2.66e-07	3.87e-07
					integral component of postsynaptic membrane	7	2.42e-07	3.87e-07
					integral component of presynaptic active zone membrane	5	2.37e-06	3.16e-06
					integral component of postsynaptic density membrane	5	3.65e-05	4.49e-05
					presynaptic cytosol	3	0.000287	0.000328
					integral component of postsynaptic specialization membrane	3	0.000896	0.000956
					synaptic vesicle	3	0.0125	0.0125
					Biological process ontology terms	Gene number	p-value	Q-value
					process in the synapse	40	5.39e-33	1.08e-31
					process in the presynapse	17	6.12e-16	6.12e-15
					process in the postsynapse	14	8.53e-14	5.68e-13
					synapse organization	12	4.47e-09	2.23e-08
					regulation of postsynaptic membrane potential	7	7.55e-09	3.02e-08
					regulation of presynaptic membrane potential	6	4.89e-08	1.63e-07
					trans-synaptic signaling	9	5.85e-08	1.67e-07
					ligand-gated ion channel activity involved in regulation of presynaptic membrane potential	5	1.18e-07	2.96e-07
					regulation of synapse organization	5	3.28e-07	7.29e-07
					synaptic vesicle cycle	8	1.01e-06	1.84e-06
					synapse adhesion between pre- and post-synapse	5	9.77e-07	1.84e-06
					transmitter-gated ion channel activity involved in regulation of postsynaptic membrane potential	5	1.93e-06	3.21e-06
					chemical synaptic transmission	7	3.28e-06	5.05e-06
					regulation of presynapse assembly	4	1.34e-05	1.91e-05
					modulation of chemical synaptic transmission	5	3.45e-05	4.6e-05
					regulation of synaptic vesicle cycle	3	7.08e-05	8.85e-05
					regulation of postsynaptic membrane neurotransmitter receptor levels	5	9.39e-05	0.000107
					postsynaptic actin cytoskeleton organization	3	9.66e-05	0.000107
					synaptic vesicle exocytosis	4	0.000276	0.000291
					neurotransmitter receptor localization to postsynaptic specialization membrane	3	0.000957	0.000957

## Sheet: SpC_GOs_Syn-UP
Spinal cord; 7 dpi; Upregulated genes					Spinal cord; 9 dpi; Upregulated genes
Cellular Component ontology terms	Gene number	p-value	Q-value		Cellular Component ontology terms	Gene number	p-value	Q-value
synapse	18	4.11e-12	2.47e-11		synapse	48	2.3e-31	2.53e-30
postsynapse	13	1.09e-09	3.28e-09		postsynapse	30	2.37e-19	1.31e-18
postsynaptic specialization	7	8.5e-06	1.7e-05		postsynaptic specialization	15	6.58e-10	2.41e-09
integral component of postsynaptic membrane	4	8.97e-05	0.000134		integral component of postsynaptic membrane	9	1.05e-08	2.88e-08
postsynaptic density	5	0.000327	0.000393		presynapse	16	4.04e-08	8.9e-08
presynapse	4	0.0291	0.0291		synaptic cleft	4	5.54e-06	1.02e-05
Biological process ontology terms	Gene number	p-value	Q-value		integral component of presynaptic membrane	7	7.92e-06	1.24e-05
process in the synapse	15	3.18e-10	1.59e-09		postsynaptic density	9	2.12e-05	2.92e-05
trans-synaptic signaling	8	7.9e-09	1.97e-08		synaptic vesicle membrane	5	0.000178	0.000218
synapse organization	8	4.27e-07	7.12e-07		postsynaptic specialization membrane	3	0.003	0.0033
synapse assembly	4	6.69e-05	8.37e-05		presynaptic active zone membrane	3	0.00537	0.00537
chemical synaptic transmission	4	0.000409	0.000409		Biological process ontology terms	Gene number	p-value	Q-value
					process in the synapse	40	5.1e-26	7.65e-25
					synapse organization	20	1.35e-15	1.01e-14
					trans-synaptic signaling	13	5.17e-11	2.59e-10
					chemical synaptic transmission	10	2.34e-08	8.76e-08
					postsynapse organization	7	3e-07	9.01e-07
					synapse assembly	6	1.92e-05	4.8e-05
					modulation of chemical synaptic transmission	5	0.000169	0.000362
					regulation of synapse assembly	4	0.000212	0.000398
					regulation of postsynapse organization	4	0.000309	0.000515
					process in the presynapse	7	0.000713	0.000972
					synaptic vesicle cycle	6	0.000699	0.000972
					synapse adhesion between pre- and post-synapse	3	0.00177	0.00222
					presynaptic modulation of chemical synaptic transmission	3	0.00234	0.00269
					process in the postsynapse	5	0.00507	0.00544
					synaptic vesicle exocytosis	3	0.00932	0.00932

## Sheet: SpC_GOs_Syn-DOWN
Spinal cord; 7 dpi; Downregulated genes					Spinal cord; 9 dpi; Downregulated genes
Cellular Component ontology terms	Gene number	p-value	Q-value		Cellular Component ontology terms	Gene number	p-value	Q-value
synapse	22	2.48e-17	2.48e-16		synapse	170	1.65e-136	5.29e-135
postsynapse	17	7.98e-15	3.99e-14		postsynapse	103	9.7e-76	1.55e-74
postsynaptic specialization	11	8.73e-11	2.91e-10		presynapse	88	1.51e-65	1.61e-64
postsynaptic density membrane	6	1.65e-07	4.12e-07		postsynaptic specialization	60	1.22e-45	9.74e-45
postsynaptic density	7	1.59e-06	2.83e-06		postsynaptic density	50	1.91e-38	1.22e-37
integral component of postsynaptic density membrane	5	1.7e-06	2.83e-06		postsynaptic density membrane	29	4.91e-26	2.62e-25
postsynaptic membrane	5	6.18e-06	8.82e-06		presynaptic active zone	25	1.37e-22	6.27e-22
integral component of postsynaptic membrane	4	7.46e-05	9.32e-05		presynaptic membrane	28	1.75e-22	6.98e-22
integral component of postsynaptic specialization membrane	3	0.000145	0.000161		integral component of postsynaptic density membrane	24	6.9e-22	2.46e-21
Biological process ontology terms	Gene number	p-value	Q-value		postsynaptic membrane	24	1.72e-19	5.49e-19
process in the synapse	18	5.3e-14	4.24e-13		integral component of presynaptic membrane	23	5.46e-18	1.59e-17
process in the postsynapse	9	3.9e-10	1.56e-09		integral component of postsynaptic membrane	20	3.37e-16	9e-16
regulation of postsynaptic membrane neurotransmitter receptor levels	6	1.65e-07	4.39e-07		presynaptic active zone membrane	17	4.53e-16	1.11e-15
synapse organization	6	5.03e-05	0.000101		integral component of presynaptic active zone membrane	15	7.96e-15	1.82e-14
neurotransmitter receptor localization to postsynaptic specialization membrane	3	0.000155	0.000247		postsynaptic specialization membrane	9	9.45e-08	2.02e-07
chemical synaptic transmission	4	0.000342	0.000456		postsynaptic cytoskeleton	7	1.37e-07	2.75e-07
postsynapse organization	3	0.000573	0.000655		synaptic vesicle	12	2.63e-07	4.94e-07
modulation of chemical synaptic transmission	3	0.000975	0.000975		presynaptic cytosol	7	5.79e-07	9.87e-07
					integral component of postsynaptic specialization membrane	8	5.86e-07	9.87e-07
					postsynaptic actin cytoskeleton	6	6.35e-07	1.02e-06
					synaptic vesicle membrane	10	1.13e-06	1.73e-06
					postsynaptic SER	4	3.23e-06	4.7e-06
					postsynaptic density, intracellular component	7	4.24e-06	5.9e-06
					integral component of synaptic vesicle membrane	7	1e-05	1.34e-05
					anchored component of presynaptic membrane	4	1.47e-05	1.81e-05
					extrinsic component of postsynaptic density membrane	4	1.47e-05	1.81e-05
					presynaptic active zone cytoplasmic component	5	2.96e-05	3.5e-05
					neuronal dense core vesicle	3	0.00159	0.00182
					synaptic membrane	3	0.00227	0.0025
					synaptic cleft	3	0.00266	0.00275
					presynaptic endocytic zone	3	0.00266	0.00275
					postsynaptic cytosol	3	0.00662	0.00662
					Biological process ontology terms	Gene number	p-value	Q-value
					process in the synapse	137	2.07e-104	1.2e-102
					synapse organization	54	4.01e-40	1.16e-38
					process in the presynapse	51	6.63e-40	1.28e-38
					process in the postsynapse	42	2.52e-34	3.65e-33
					synaptic vesicle cycle	36	4.64e-28	5.38e-27
					trans-synaptic signaling	32	4.61e-24	4.46e-23
					chemical synaptic transmission	27	2.14e-20	1.78e-19
					synaptic vesicle exocytosis	18	5.8e-16	4.21e-15
					regulation of postsynaptic membrane neurotransmitter receptor levels	19	1.61e-14	1.03e-13
					regulation of postsynaptic membrane potential	15	7.53e-14	4.06e-13
					postsynapse organization	16	8.14e-14	4.06e-13
					modulation of chemical synaptic transmission	17	8.4e-14	4.06e-13
					synapse assembly	17	1.97e-13	8.81e-13
					regulation of presynaptic membrane potential	13	8.71e-13	3.61e-12
					regulation of postsynapse organization	13	7.3e-12	2.82e-11
					ligand-gated ion channel activity involved in regulation of presynaptic membrane potential	10	3.15e-11	1.14e-10
					transmitter-gated ion channel activity involved in regulation of postsynaptic membrane potential	11	3.6e-10	1.23e-09
					neurotransmitter receptor localization to postsynaptic specialization membrane	10	4.2e-09	1.35e-08
					regulation of synapse assembly	10	7.47e-09	2.28e-08
					structural constituent of synapse	9	9.27e-09	2.69e-08
					synapse adhesion between pre- and post-synapse	9	2.17e-08	6e-08
					regulation of presynapse assembly	8	7.32e-08	1.93e-07
					synaptic vesicle endocytosis	9	1.54e-07	3.88e-07
					regulation of postsynaptic neurotransmitter receptor endocytosis	7	5.79e-07	1.4e-06
					regulation of presynaptic cytosolic calcium levels	7	7.14e-07	1.66e-06
					regulation of synapse organization	7	8.75e-07	1.95e-06
					modification of postsynaptic structure	7	1.07e-06	2.29e-06
					regulation of synaptic vesicle exocytosis	7	1.55e-06	3.22e-06
					structural constituent of presynapse	5	1.89e-06	3.78e-06
					regulation of postsynaptic cytosolic calcium levels	5	2.71e-06	5.25e-06
					calcium-dependent activation of synaptic vesicle fusion	5	5.19e-06	9.72e-06
					regulation of calcium-dependent activation of synaptic vesicle fusion	4	1.47e-05	2.66e-05
					postsynaptic specialization assembly	6	1.92e-05	3.28e-05
					modification of postsynaptic actin cytoskeleton	5	1.92e-05	3.28e-05
					structural constituent of active zone	4	2.18e-05	3.51e-05
					regulation of modification of postsynaptic actin cytoskeleton	4	2.18e-05	3.51e-05
					regulation of neurotransmitter receptor localization to postsynaptic specialization membrane	5	2.96e-05	4.64e-05
					voltage-gated calcium channel activity involved in regulation of presynaptic cytosolic calcium levels	4	3.11e-05	4.75e-05
					postsynaptic process involved in chemical synaptic transmission	5	5.27e-05	7.84e-05
					presynaptic modulation of chemical synaptic transmission	6	6.69e-05	9.7e-05
					trans-synaptic signaling by trans-synaptic complex	4	7.64e-05	0.000108
					voltage-gated ion channel activity involved in regulation of postsynaptic membrane potential	3	0.00011	0.000148
					voltage-gated calcium channel activity involved in positive regulation of presynaptic cytosolic calcium levels	3	0.00011	0.000148
					regulation of synaptic vesicle cycle	4	0.000194	0.000256
					regulation of postsynaptic neurotransmitter receptor activity	4	0.000237	0.000299
					presynapse assembly	4	0.000237	0.000299
					postsynaptic actin cytoskeleton organization	4	0.000286	0.000353
					postsynaptic density assembly	4	0.000342	0.000414
					synaptic vesicle neurotransmitter loading	3	0.000495	0.000586
					postsynaptic modulation of chemical synaptic transmission	4	0.000558	0.000648
					structural constituent of postsynapse	4	0.000648	0.000737
					protein catabolic process at postsynapse	3	0.00084	0.000936
					synaptic vesicle priming	3	0.00159	0.00174
					regulation of postsynaptic density assembly	3	0.00191	0.00205
					regulation of synaptic vesicle endocytosis	3	0.00227	0.00239
					transport	4	0.0024	0.00248
					voltage-gated ion channel activity involved in regulation of presynaptic membrane potential	3	0.00266	0.00271
					metabolism	6	0.00367	0.00367
