# Supplementary material for: Virus infection of the CNS disrupts the immune-neural-synaptic axis via induction of pleiotropic gene regulation of host responses
Source: eLife. 2021 Feb 18;10:e62273. doi: 10.7554/eLife.62273 (PMC7891934; doi:10.7554/eLife.62273)
Supplement: Supplementary file 5. [file elife-62273-supp5.xlsx]

## Sheet: Cerebellum-9dpi_ORT-based
94 common elements in "571-genes-CB_Immune System" and "252-genes-CB_Nervous System":	477 elements included exclusively in "571-genes-CB_Immune System":	158 elements included exclusively in "252-genes-CB_Nervous System":
MBP	HLF	OMG
TCIRG1	FAIM3	OLFM3
EPHA2	ITGAL	TNC
JAK2	SYNCRIP	STAP1
HCLS1	RHOH	TNIK
IL6	MAP3K5	NES
TGFB1	NLRC5	LPAR1
DLL1	FYB	CNTN3
ITGA4	LILRB2	RAC2
RUNX3	CHI3L1	RAB21
ADM	CDKN2B	TIMP4
RHOG	IRF9	BAI3
C1QA	FCGR1	MCOLN3
PRDM1	TRIM56	NAV3
FCGR2B	CD180	NTNG2
IFNG	GLA	LIG1
MOV10	CD300LF	ASCL1
TLR2	KITLG	FAP
THRA1	ANXA2	ADCYAP1
SOX4	IL18BP	NRBP2
PTX3	CD14	NRP1
BAX	TNFAIP6	TNR
BMP4	IFI27	NRP2
LST1	IFIT2	PRKCH
VIM	ITGA5	UFL1
CCR2	C3AR1	ASPM
SEMA4D	LCN2	HECW2
SHC1	APOBEC3H	CFLAR
BCL11B	CXCL8	HGF
CYFIP1	FAM20C	ARHGDIA
ZBP1	ARPC2	CLN8
SDC4	CCL5	NINJ1
PTPRR	IKZF3	PLXNC1
TYROBP	MUC15	FOXP2
NAIP	ITGB2	CASP5
TNF	GZMA	CMA1
STAT3	IL15	NDRG2
ETV6	PLEK	TNFRSF12A
DOK2	DOCK11	NOG
TGFBR2	FASLG	SCARB2
BCL2L11	BTK	ASPA
GPR183	NFKBIA	NPAS4
SLC7A11	KIF11	PRKCA
CTSL2	CRISPLD2	SEMA3G
FPR2	GALNT2	KCNAB1
CIB1	TICAM2	EPHA5
IL1B	CR1	FGF2
CXCR4	SEC24D	INTU
AIF1	IFITM1	SOX1
KRAS	STAT2	GABRB1
S100A8	MX2	ABCD1
AXL	CD86	RBFOX1
CSF1	TRIM34	LGI1
GRN	TNFRSF10B	SHC3
SEMA4A	FCAR	SHROOM4
HK2	SIGLEC9	MACROD2
CSF1R	CST3	PDLIM5
BAK1	IL10RB	SCARF1
P2RY12	EDN1	AKNA
EDN3	FGL2	PCDH18
TLR4	CD3G	FGF12
SOS1	RAP2B	TGIF2
ANXA3	PIK3CG	PLXDC1
ETS1	TMEM63A	MET
RELA	LGMN	AGRN
CCL2	PML	GRIK1
FKBP1B	CXCL9	GPM6B
CD3E	MRC1L1	RND2
GFI1	TOP2A	GPR157
S100B	HERC5	FARP1
C3	TLR3	PFN1
HMGB1	S100P	CC2D2A
TOX	LYZ	VIT
LGALS1	CEACAM8	EGR2
GATA3	DHX58	DHFR
FLNA	LGALS3	CASZ1
MAPK1	PSMA3	FBXL17
B2M	SP100	EZR
CXCL12	TNFRSF10D	LRP4
MDK	BST2	GNB4
CD38	MID2	NRK
MAFB	CD2	GPR37L1
WDR1	MYD88	IFT57
ITGA1	CLEC12A	EXT1
TGFB2	APOBEC3A	BCL2A1
CCL3	IL1RN	ODZ2
FN1	TAPBP	HHIP
NCKAP1L	CD28	GABRA2
NOTCH2	FUCA1	NEGR1
RUNX1	KIF2C	SLC4A7
CXCL1	ITGB7	SLC1A2
ODZ1	PRKD2	ADORA2A
C5AR1	ARHGAP9	PLOD3
ANXA1	CXCL13	APC2
	CD8B	SEMA5B
	HLA-E	BACE2
	NOD2	PGAP1
	XCR1	AMIGO2
	EGR1	BMPR1B
	IRF8	BHLHE40
	GPR84	GFAP
	GBP2	SOX5
	JUNB	TRPC6
	TBC1D10C	APOE
	TLR6	STK24
	NCF1	SSTR1
	TRIM5	LRP8
	FPR1	TTLL7
	CXCL10	MATN2
	BTN3A3	EZH2
	PYCARD	ATF5
	AIM2	SLITRK1
	CD53	STRC
	SLFN13	SHOX2
	LILRB4	ARL6
	IKZF1	KIF20B
	CASP1	ID1
	OAS3	ZIC4
	SAMHD1	POSTN
	IRF3	ISLR2
	CDK2	EFNA5
	PLCG2	KCNJ10
	OAS1	DOK6
	PRF1	HLX
	LTBR	KCNA2
	CD36	CNTNAP2
	PSME2	CDH19
	LAT2	SSR3
	BTLA	SLIT1
	LILRB1	AVIL
	CASP4	GNRH1
	PLAU	RORB
	SMAD3	CPNE9
	IL1RAP	IDH2
	CCL18	TACC3
	MS4A1	ST8SIA4
	CD27	SEMA6D
	CDKN1A	BEND6
	PTPN22	TSPO
	IFIT3	NAT1
	CRIP1	UNC13B
	PI3	SH3KBP1
	BLNK	ENG
	SKAP1	MOBP
	ISG15	DOC2A
	PMAIP1	LZTS1
	RNASET2	KLHL1
	SERPINB10	CNTN6
	OAS2	IER2
	RGS1	SPP1
	ICOS	ENAH
	JAK3	DPYSL3
	LILRA2	GLI1
	IL7	SALL4
	RAB20	IGSF10
	TAC1	MMP14
	CD274	EGR3
	C1RL	S100A6
	DOCK8
	DNASE1L1
	RNASEL
	SLC27A2
	STOM
	CTSD
	IFI16
	TAP2
	TNFAIP8L2
	PLEKHO2
	SELL
	HP
	DOCK2
	SLC16A3
	ICAM2
	POU2AF1
	XAF1
	BTN2A2
	MSN
	RNASE6
	FAS
	MX1
	OLFM4
	PDCD1LG2
	APOBEC3G
	IL2RG
	IRF7
	HEBP2
	MPL
	LY75
	IFITM3
	COTL1
	DDX58
	CD58
	CD5
	AGA
	SECTM1
	MVP
	MT2A
	CD47
	PRKCB
	CCR5
	CD93
	LAIR1
	C1QC
	C13orf15
	ARL11
	CD164
	THBD
	TNIP3
	ESCO2
	IL12RB1
	CD300LG
	IFNAR2
	CCL23
	CTLA4
	BATF
	NRAS
	TNFSF13B
	ERAP1
	IFI35
	SYK
	CTSW
	CASP8
	CCL8
	CECR1
	CTSB
	DYSF
	FCN1
	ALDH3B1
	IL17RA
	HLA-DQA1
	SERPINA1
	TRIM22
	TNFRSF17
	SLC46A2
	PSMA6
	MCOLN2
	IRF2
	RBCK1
	IRF5
	TBX21
	CXCR6
	TNFAIP3
	WIPF1
	TMEM173
	GZMB
	IFIT1
	TNFRSF13B
	CCR3
	KYNU
	IGJ
	DDX60
	CIITA
	NFKB2
	PSME1
	AEN
	STAT1
	TNFSF10
	CORO1A
	PSMC2
	RIPK2
	CGA
	HERC6
	SERPING1
	SLAMF7
	IGKC
	LILRA4
	TRIL
	CTSL
	TRIM14
	APOBEC3C
	THBS1
	FLI1
	BCL3
	IKBKE
	NBN
	CD48
	PRDX1
	LAG3
	PSMA2
	CMKLR1
	ATP6V0A2
	SELE
	RBM47
	CST7
	IL4R
	TIFA
	NOD1
	CCR7
	CD109
	CD4
	SMAD6
	CD74
	RSAD2
	CCL19
	CAV1
	NMI
	TRIM38
	LTB
	SH2D1B
	PLA2G2D
	RIPK3
	SNX10
	KLRD1
	NKG2D
	PTGER4
	IL7R
	TXK
	ADGRE1
	FCER1G
	GNS
	TRAT1
	GCNT1
	SIT1
	CXCL2
	TREML1
	PTPRJ
	IL1R1
	NAMPT
	SLFN11
	BIN2
	CD44
	GLIPR1
	PSMF1
	C1S
	LAMP1
	KLHL6
	ITK
	PTPRC
	SLAMF6
	ARPC1B
	SEC24A
	TAP1
	CBFB
	ISG20
	SEPX1
	NCF2
	SIRPG
	FGR
	TNFRSF14
	MMP9
	IDO1
	PARP9
	FCGR3
	EIF2AK2
	CD3D
	TNFRSF10A
	KIF4A
	GSDMD
	TLR10
	CXCL11
	CTSC
	IFIT5
	CXCR3
	PYHIN1
	OLR1
	OSCAR
	VAMP8
	TREM1
	HPSE
	ZC3HAV1
	RAB3B
	SIRPB1
	MGST1
	GCH1
	ALPK1
	CD40
	SDC1
	CALCOCO2
	ELMO2
	LILRB5
	IL21R
	CSF3R
	LGR4
	TMBIM1
	THEMIS2
	MYO1G
	GPR18
	HHEX
	HLA-DOA
	IFI44L
	PLSCR1
	LCP1
	CLEC7A
	STAT6
	IFIH1
	IL2RA
	CKLF
	HELLS
	IDO2
	TRIM21
	CD19
	SH2D1A
	C19orf66
	PARP14
	SGPL1
	SERPINB9
	LILRA1
	SEC61A1
	TICAM1
	SERPINA3
	PLAC8
	ELF4
	F2RL1
	FPR3
	SLC2A5
	TLR1
	SKAP2
	ICAM3
	NUB1
	HRH2
	IRF1
	HMOX1
	HK3
	TLR8
	RAB27A
	CCR1
	CD33
	RTP4
	TTC7A
	GPR65
	ICOSLG
	SLAMF8
	CLEC4A
	CTSA
	CXCL16
	VAV1
	PSMB9
	TAPBPL
	B4GALT1
	PSMB2
	TMEM106A
	GPSM3
	SLC11A1
	EVI2B
	SBNO2
	NPC2
	ICAM1
	DAO
	FCGRT
	PIK3AP1
	RAB32
	IRG1
	OASL
	CYBB
	SPI1
	GBP1
	LY96
	IL1R2
	ORAI1
	ADGRE2
	CTSH
	PSMB10
	SDC3
	SLA2
	CD40LG
	UNC93B1
	IFI6
	LAT
	PECAM1
	IL6R
	TNFSF13
	DTX3L
	CD84
	CD63
	CH25H
	LCP2
	PTPRN2
	RELB
	HAVCR2
	HSD3B7
	SLAMF1
	IL18RAP
	BIRC3
	OPTN
	ADAMDEC1
	VSIG4
	CANX

## Sheet: Spinal cord-9dpi_ORT-based
179 common elements in "826-genes-SpC_Immune System" and "642-genes-SpC_Nervous System":	647 elements included exclusively in "826-genes-SpC_Immune System":	463 elements included exclusively in "642-genes-SpC_Nervous System":
LMO4	CXADR	RGS4
REG1A	FAIM3	ARHGAP4
TCIRG1	ITGAL	ANK2
EPHA2	MAP3K5	SPAST
HOXB3	RHOH	OMG
HSP90AA1	NLRC5	TNC
CSK	FYB	STAP1
HCLS1	LILRB2	TAF1
IL6	CHI3L1	DCDC2
TREM2	IPO7	TSKU
TGFB1	KLF1	MPP5
DAB2IP	IRF9	BPTF
CLP1	REG1B	TNIK
GATA2	FCGR1	ADAM23
PIK3R1	CDH26	LIAS
DHX36	TRIM4	HAPLN3
DLL1	CD300LF	SYT1
ITGA4	GLA	SLITRK4
RUNX3	KITLG	KANK1
CALR	PKNOX1	PLXNA2
SLC11A2	TNFSF8	LPAR1
BCL10	IL18BP	PIKFYVE
HES1	RFTN1	RAC2
ADM	CD14	TMOD2
C1QA	TNFAIP6	LRRTM3
PRDM1	IFI27	PLXNA4
FCGR2B	IFNA2	THOC2
IFNGR1	IFIT2	BAI3
JUN	TLR9	CAPRIN1
RACGAP1	MMP25	ROBO2
HDAC9	TOLLIP	EPHA1
RAB35	ITGA5	PCDHA11
ZBTB16	C3AR1	TACC2
IFNG	LCN2	C5orf42
MOV10	APOBEC3H	LIG1
RPS6KA3	JUP	SKI
CX3CL1	HSPA8	NKD1
BCR	CXCL8	PROM1
EIF2B3	FAM20C	ATP2B2
HSP90AB1	PSMD6	TRAF3IP1
SEC24B	ARPC2	ASCL1
PTK2B	CCL5	PCDHAC2
RARA	PIK3C3	FAP
ZC3H12A	DNCI1	LHX4
TLR2	IKZF3	P2RY1
G6PD	ZNF160	DGCR14
HIPK2	ITGB2	MBD5
PTX3	IRF6	BMP2
PSEN1	GZMA	NRBP2
XBP1	CCL20	NRP1
PRKD1	APBB1IP	QKI
SOX6	CD276	NRP2
PRKACB	IL15	SORL1
BAX	PLEK	UFL1
BCL6	OSM	DIXDC1
LIF	PYGO1	CDKL5
FZD3	FASLG	MAPK7
NCSTN	NFKBIA	KLF7
VIM	BTK	DNM1L
CCR2	GALNT2	HECW2
APP	TICAM2	NAB2
SEMA4D	SMAD5	IFT88
SHC1	SEC24D	BCAS1
ZBP1	IFITM1	NDP
PTPN11	STAT2	AGTPBP1
CASP3	MX2	CSNK1D
TYROBP	CD86	CFLAR
CITED2	CYSTM1	ARHGDIA
LRRC7	TRIM34	CLN8
LST1	TNFRSF10B	NINJ1
BSG	SART3	PLXNC1
LTA	FCAR	FRYL
NAIP	SIGLEC9	GLUD1
TNF	MAP3K8	SPAG9
STAT3	CST3	CASP5
PAFAH1B1	IL10RB	SMARCC2
ETV6	FOXP1	CMA1
DOK2	EDN1	NDRG2
DOCK10	FGL2	SCN8A
BCL2L11	CD3G	FCMD
GPR183	ITCH	KIAA0319
ALCAM	CAB39	TNFRSF12A
XRCC6	TMEM63A	RPGRIP1L
ARHGEF7	LGMN	ASPA
TCF12	PML	NRG3
SLC7A11	CLTC	DCC
CTSL2	CXCL9	CAPRIN2
ITGA6	MSH3	PRKCA
LYN	TOP2A	NRXN1
EML1	HERC5	SPTBN1
ID2	TLR3	PLAG1
FPR2	CNPY3	MAP1A
CIB1	S100P	ERCC6
RPS6KA5	BTN1A1	COX17
IL1B	LYZ	ADNP
AIF1	IFNA10	SEMA3G
MED1	CEACAM8	CHRM3
KRAS	RRAS	NAV2
ARF1	DHX58	BDNF
S100A8	LGALS3	DNAH5
PTK2	JAK1	DOK1
AXL	MITF	SLIT2
EIF2AK4	SP100	DPYSL4
TGFBR1	BST2	FGF9
XRCC5	BTNL9	FGF2
SRF	MID2	SCRG1
ITGA3	CD80	DCX
CSF1	SFXN1	MDGA2
VCAM1	CD2	INTU
GRN	TRIM29	PALLD
CYFIP2	IKBKB	HAPLN1
SEMA4A	MYD88	TMEM107
KIF2A	GPLD1	GABRB1
EFNB1	FBXO9	ABCD1
CSF1R	C5	VPS35
BAK1	CMTM7	GRIP1
TP53	NFAM1	RHOBTB3
PRKDC	APOBEC3A	MSX1
KLF4	IL1RN	NEDD4L
P2RY12	TAPBP	AK4
EDN3	KIF2C	KCNA1
TLR4	TRAF2	RAPGEF5
WNK1	ITGB7	CNTNAP1
ETS1	MSH6	ERBB3
RELA	PRKD2	LGI1
P2RX4	CXCL13	FAIM
CCL2	HLA-E	PRDM5
RTN4	CD6	SHC3
KIF5B	NOD2	IMMP2L
PURA	ATP11B	FUT9
ADAM10	XCR1	SOCS2
FBXO38	IRF8	FKBP4
ARSB	EGR1	CRH
PTPRZ1	BVES	MACROD2
CDK6	GPR84	OPA1
NCAM1	SEC14L1	MYT1L
GFI1	GBP2	NAPA
SFRP1	JUNB	GSK3B
EDNRB	CAMP	TAOK2
SKIL	ATG7	SCARF1
HMGB1	TBC1D10C	AKNA
SNAP25	TAB3	SLC17A8
ARSA	NCF1	TBC1D32
WNT10B	FPR1	ADCY1
DNM2	TRIM5	TIAM1
GATA3	CXCL10	VWC2
FLNA	BTN3A3	FZD2
MAPK1	RNF135	ZMYND8
EOMES	CEBPD	FGF12
CHD7	PYCARD	TGIF2
B2M	AIM2	PLXDC1
CXCL12	ZMYND11	RPS6KA6
DLC1	CD53	ATP2B4
MDK	SLFN13	AHI1
NEDD4	LILRB4	STRN
S100A9	IKZF1	HERC1
PTN	CASP1	SLC4A10
CD38	OAS3	SHROOM3
MAFB	IRF3	RND2
BECN1	CDK2	MEF2A
WDR1	SAMHD1	ALDH3A2
ITGA1	OAS1	CHRDL1
PBX1	IRF2BP2	PCDHB13
LEPR	PRF1	NYAP2
CCL3	LTBR	KDM6A
STK4	CD36	FARP1
FN1	PSME2	SOX17
CEP290	LAT2	NTRK3
NOTCH2	BTLA	IL6ST
RUNX1	GCA	PFN1
CXCL1	LILRB1	NTN4
ODZ1	CASP4	NR2C2
TMEM30A	DYNC1LI2	CRIM1
FGFR2	PLAU	PRKG1
CLCF1	SMAD3	SBF2
C5AR1	SIVA1	NRG1
PAK2	IL1RAP	CC2D2A
ANXA1	CCL18	PCSK2
BRAF	CEACAM6	CDH2
	RXRA	PTCHD1
	DHX9	PRDM6
	CD27	EGR2
	CDKN1A	DHFR
	PTPN22	UBE4B
	IFIT3	TWIST1
	TLR7	SCN2A
	CRIP1	LYPLA2
	PI3	ECT2
	ATP6V1D	CTTNBP2
	ISG15	BCL11A
	PMAIP1	CCDC88A
	UNC13D	ATRN
	RNASET2	HMGCS1
	SERPINB10	TRIP11
	OAS2	EGFR
	RGS1	PCDHA5
	ICOS	ZEB1
	JAK3	BBS4
	TRIM59	EZR
	CDK4	LRP4
	XG	ATP2B1
	LILRA2	WDR19
	RAB20	IFT57
	IL7	ALDH1A2
	CD274	AKT2
	ANKHD1	EXT1
	IGBP1	SPEN
	C1RL	KALRN
	DNASE1L1	SEMA5A
	RNASEL	MYO5A
	STOM	BCL2A1
	C2	SEMA3F
	ITFG2	ODZ2
	RNASE2	HHIP
	COL1A1	NGFR
	IFI16	SLC39A12
	TAP2	APBB2
	SHMT2	XAB2
	TNFAIP8L2	FBXO7
	ENPP2	USP9X
	RAB31	SLC1A2
	PLEKHO2	ADORA2A
	PDGFB	ACER3
	FCGR2A	ABL2
	NEU1	CEP68
	F11R	LRRK2
	IRAK1	PPFIA2
	SELL	ZEB2
	HP	RRN3
	SWAP70	PLAA
	SLC16A3	OPCML
	SLCO1B1	SRGAP2
	ICAM2	C3orf17
	POU2AF1	PTPRM
	XAF1	SCN3B
	DCLRE1C	PPP1R9A
	BTN2A2	CLASP2
	NFATC2	INPP5F
	SLC12A2	ROBO1
	RNASE6	WRN
	FAS	SSR2
	PRKRA	PLOD3
	MX1	FAM5C
	PDCD1LG2	TBX3
	APOBEC3G	WWP1
	IL2RG	FOS
	POLR3B	BACE2
	SLC7A9	BTG2
	IRF7	ARHGEF10
	HEBP2	NET1
	KIF18A	AMIGO2
	IFITM3	FAM129B
	TAB2	BMPR1B
	COTL1	GFAP
	DDX58	NFIB
	CD58	SOX5
	MELK	MDGA1
	OSBPL1A	ATL1
	CD5	COL4A1
	AGA	TIAM2
	DEFB1	APOE
	SECTM1	STK24
	MVP	BMPR2
	GEM	STIL
	CD47	EFHC1
	IGF1R	NTRK2
	CCR5	CLMN
	FNIP1	SNRPB
	LAIR1	PRRX1
	C1QC	GABRA5
	CD93	RRM1
	PSMD9	PTPRD
	PDXK	TMEM106B
	ENDOU	NELL2
	POU2F2	HEBP1
	ARL11	UNC13A
	CD164	SYNJ1
	RPS6KB1	NCAM2
	THBD	PIGT
	SRPK2	PLDN
	STAT5B	RARB
	BTNL3	EMB
	ARMC8	EPHA4
	KIFAP3	ITGA8
	MYO1C	EFHD1
	KIF3B	PHACTR4
	IFNAR2	MAPK6
	TRIM26	LRRN1
	CCL23	SDK2
	CTLA4	PROX1
	BATF	RUFY3
	AGPAT5	TTLL7
	DSN1	GIGYF2
	JAM2	MATN2
	TNFSF13B	KIF27
	ZBTB1	MYH10
	ERAP1	PHF15
	IFI35	SOX3
	ERCC1	CRB1
	SYK	EZH2
	CTSW	EPB41L3
	CCL8	BOC
	CECR1	TOR1A
	CTSB	CNTN1
	DLG1	ATF5
	STON2	SLITRK1
	RAB12	CDK1
	SNAP29	UGT8
	HUWE1	TRAK1
	TUBB	FLRT3
	BRI3	RAPGEF2
	FCN1	KIDINS220
	ALDH3B1	PTPRG
	IL17RA	TACC1
	SLC39A3	IL1RAPL1
	FLT3LG	SHOX2
	HLA-DQA1	ZNF24
	SERPINA1	ANK3
	MAP3K7	ARL6
	CDK13	ID1
	EXOSC3	NRCAM
	TRIM22	SMAD4
	GPAM	PDGFC
	TNFRSF17	MAN2A1
	PSMA6	THOC6
	IRF2	GRB10
	RBCK1	GRIN2B
	TRIM27	MYO16
	TBX21	C1QL1
	IRF5	EPHB2
	KLC1	STMN2
	TNFAIP3	FZD1
	WIPF1	ERBB4
	TMEM173	KCNJ10
	HSPA9	TTL
	CCND3	GFRA1
	GZMB	HLX
	IFIT1	KCNA2
	TNFRSF13B	SEMA6A
	KYNU	ATRX
	IGJ	POU4F2
	SEC13	LHX9
	DDX60	ZNF165
	KPNB1	CNP
	CIITA	NEXN
	NFKB2	DNM3
	PSME1	FEZ2
	STAT1	CNO
	TNFSF10	ZNF430
	AEN	SSR3
	KLRG1	NLGN1
	CORO1A	RIMS2
	PSMC2	TCF4
	CGA	FGF14
	HERC6	ARFGEF1
	SERPING1	FRY
	SLAMF7	ATP1A2
	IGKC	FLRT2
	IFNB1	ETV5
	CTSL	CPEB3
	TRIM14	PLCB1
	APOBEC3C	GABRB3
	THBS1	PPARGC1A
	BCL3	SYNJ2
	IKBKE	NF1
	CD48	CIT
	FLT1	TACC3
	EPPIN	COL3A1
	CARD9	EYA1
	NFIL3	KIAA1024
	LAG3	NTNG1
	PSMA2	KIF5C
	LAMTOR3	SEMA6D
	CMKLR1	ATP8A2
	ATP6V0A2	FBXO45
	SELE	BAG3
	RBM47	MTMR2
	CST7	GFRA3
	TIFA	TTBK2
	IL4R	ABI2
	CLEC4E	MCF2
	IRAK2	BEND6
	ADA	IFT172
	PSMD1	USP21
	NOD1	UBE3A
	CCR7	NLGN4Y
	SMAD6	CAMSAP1
	CD4	LSAMP
	CD74	MEF2D
	ZBTB7B	TSPO
	RSAD2	PLK2
	CCL19	CREB1
	PPIL2	NAT1
	MECOM	MIB1
	NMI	ADAM22
	TRIM38	MFSD8
	SLPI	SOX11
	LTB	MAP4K4
	PTPN6	LAMA2
	PLA2G2D	UNC13B
	RIPK3	SPATA5
	GPR116	MAP3K13
	POLR3G	B3GNT5
	ANLN	SMARCA1
	NHLRC3	DKK1
	LRMP	ENG
	KLRD1	LPAR3
	NKG2D	GRIN3A
	PTGER4	MOBP
	IL7R	RFX4
	FCER1G	GAB1
	ADGRE1	MTR
	TFRC	ONECUT2
	TNFSF15	FOXC1
	PLEKHA1	SEMA3D
	TRAT1	NEFL
	GCNT1	LZTS1
	IKBKG	NIPBL
	VPREB3	ACAT1
	SIT1	CNTN6
	CXCL2	RPE65
	TREML1	PPP2R3A
	PTPRJ	NDNF
	FLVCR1	IER2
	STXBP4	MYCBP2
	NCBP3	SIM2
	FLT3	RNF6
	MAPKAPK2	MECP2
	DPP8	CTNNA2
	CANT1	TTC8
	SLFN11	ZPR1
	CALCA	ELL3
	IFNW1	LLPH
	BIN2	VLDLR
	CD44	RDH13
	PSMF1	MACF1
	C1S	ENAH
	LAMP1	DAB1
	KLHL6	PARD3
	ITK	TTC21B
	CXCL17	GLI1
	APEH	PAM
	PTPRC	PTCH1
	ARPC1B	KDM4C
	MYST3	SHANK2
	TAP1	BHLHB9
	IFNLR1	IGSF10
	CBFB	HECW1
	DYRK3	ASCL2
	CFB	EHD1
	ISG20	GALC
	HSP90B1	ETV1
	SEPX1	MYEF2
	NCF2	MMP14
	SIRPG	MARK2
	FGR	FGF13
	SURF4	CTNNA1
	TNFRSF14	PCM1
	ANPEP	EGR3
	MMP9	S100A6
	PARP9	FES
	IDO1	LRP6
	AGL	MBNL1
	DHRS7B
	FCGR3
	ESAM
	QSOX1
	EIF2AK2
	CD3D
	AGPAT2
	TNFRSF10A
	GSDMD
	IL10
	IFNA8
	CAND1
	CXCL11
	CTSC
	TLR10
	IFIT5
	CXCR3
	TRIM23
	PYHIN1
	OLR1
	VAMP8
	TREM1
	HPSE
	ZC3HAV1
	GLG1
	SIRPB1
	ATP8A1
	MGST1
	GCH1
	CD40
	ALPK1
	SDC1
	FER
	OTULIN
	IL21R
	PJA2
	CPPED1
	CSF3R
	MICB
	TMBIM1
	THEMIS2
	MYO1G
	HHEX
	YES1
	HLA-DOA
	IFI44L
	TMEM179B
	PLSCR1
	LCP1
	CLEC7A
	NFKB1
	STAT6
	IFIH1
	ANKRD17
	LILRA3
	CKLF
	BNIP3L
	IL2RA
	HIST1H2BJ
	DCTN4
	IDO2
	TRIM21
	SH2D1A
	C19orf66
	PARP14
	PGM3
	SGPL1
	POLR3K
	ELMOD2
	ATP8B4
	LILRA1
	MGAM
	POLR3D
	SEC61A1
	ARID4A
	TICAM1
	IFNGR2
	SERPINA3
	PLAC8
	ELF4
	FPR3
	SLC2A5
	PTPRB
	RC3H2
	IRAK1BP1
	ICAM3
	HMOX1
	IRF1
	HK3
	TLR8
	RAB27A
	SLC15A4
	CCR1
	CD33
	NBEAL2
	RTP4
	GPR65
	SIRPA
	ICOSLG
	CD248
	SLC16A8
	CUL4A
	CD70
	SLAMF8
	MAPKAPK3
	CLEC4A
	CTSA
	VAV1
	PSMB9
	TAPBPL
	TNFSF12
	B4GALT1
	PSMB2
	STK10
	TMEM106A
	IL12A
	GPSM3
	SLC11A1
	PRRC2C
	SBNO2
	ICAM1
	DAO
	KRT1
	USP14
	DNAJC3
	WISP1
	FCGRT
	PIK3AP1
	RAB32
	IRG1
	OASL
	CYBB
	TSPAN14
	SPI1
	GBP1
	LY96
	IL1R2
	ORAI1
	WDR78
	M6PR
	CDC42EP4
	CTSH
	PSMB10
	CEACAM1
	SDC3
	SLA2
	CD40LG
	UNC93B1
	CDC42EP2
	APOBEC3F
	LAT
	LRRC17
	TNFSF13
	IL6R
	DTX3L
	CD84
	CD63
	CH25H
	UBR4
	LCP2
	TET2
	RAB9B
	RELB
	MARCO
	MAP2K6
	HAVCR2
	RNF125
	ITGAV
	HSD3B7
	CD46
	CD300C
	AIMP1
	SLAMF1
	STXBP2
	IL18RAP
	BIRC3
	SH2B2
	GUSB
	HAMP
	ADAMDEC1
	VSIG4
	LCK
	RETN
	SQSTM1
