# Supplementary material for: Virus infection of the CNS disrupts the immune-neural-synaptic axis via induction of pleiotropic gene regulation of host responses
Source: eLife. 2021 Feb 18;10:e62273. doi: 10.7554/eLife.62273 (PMC7891934; doi:10.7554/eLife.62273)
Supplement: Supplementary file 6. [file elife-62273-supp6.xlsx]

## Sheet: 94 I-N genes_CC_CB-9dpi
94 common genes_Immune-Nervous-Systems_Cerebellum-9dpi
GO cellular component complete	Number of genes - REFLIST (20851)	Number of genes - Analyzed (94)	Expected	Over/under-represented	Fold Enrichment	raw P-value	FDR
cell surface (GO:0009986)	950	29	4.56	+	6.37	9.01e-16	1.81e-12
secretory granule (GO:0030141)	843	25	4.04	+	6.18	2.43e-13	2.45e-10
extracellular space (GO:0005615)	3343	46	16.03	+	2.87	2.38e-12	1.2e-09
cell (GO:0005623)	1115	27	5.35	+	5.05	2.34e-12	1.57e-09
secretory vesicle (GO:0099503)	1011	25	4.85	+	5.16	1.18e-11	4.74e-09
extracellular region (GO:0005576)	4380	51	21.01	+	2.43	3.97e-11	1.14e-08
cell periphery (GO:0071944)	5868	60	28.14	+	2.13	3.73e-11	1.25e-08
plasma membrane (GO:0005886)	5738	59	27.52	+	2.14	5.53e-11	1.39e-08
cell body (GO:0044297)	590	19	2.83	+	6.71	7.13e-11	1.6e-08
cell projection (GO:0042995)	2285	32	10.96	+	2.92	1.49e-08	3.01e-06
somatodendritic compartment (GO:0036477)	860	19	4.12	+	4.61	2.99e-08	5.49e-06
intracellular vesicle (GO:0097708)	2386	32	11.44	+	2.8	4.15e-08	5.97e-06
neuronal cell body (GO:0043025)	521	15	2.5	+	6	3.72e-08	6.24e-06
cytoplasmic vesicle (GO:0031410)	2383	32	11.43	+	2.8	4.03e-08	6.24e-06
secretory granule lumen (GO:0034774)	320	12	1.53	+	7.82	6.2e-08	8.33e-06
cytoplasmic vesicle lumen (GO:0060205)	324	12	1.55	+	7.72	7.07e-08	8.9e-06
vesicle lumen (GO:0031983)	326	12	1.56	+	7.68	7.54e-08	8.94e-06
whole membrane (GO:0098805)	1701	26	8.16	+	3.19	9.48e-08	1.06e-05
focal adhesion (GO:0005925)	409	13	1.96	+	6.63	1.09e-07	1.15e-05
cell-substrate adherens junction (GO:0005924)	412	13	1.98	+	6.58	1.18e-07	1.19e-05
cell-substrate junction (GO:0030055)	416	13	2	+	6.52	1.31e-07	1.26e-05
integral component of plasma membrane (GO:0005887)	1639	25	7.86	+	3.18	1.86e-07	1.71e-05
vesicle (GO:0031982)	3877	41	18.59	+	2.21	2.13e-07	1.86e-05
endomembrane system (GO:0012505)	4563	45	21.88	+	2.06	3.15e-07	2.65e-05
intrinsic component of plasma membrane (GO:0031226)	1715	25	8.23	+	3.04	4.33e-07	3.49e-05
adherens junction (GO:0005912)	555	14	2.66	+	5.26	5.24e-07	4.06e-05
anchoring junction (GO:0070161)	571	14	2.74	+	5.11	7.29e-07	5.44e-05
plasma membrane bounded cell projection (GO:0120025)	2197	28	10.54	+	2.66	1.09e-06	7.82e-05
external side of plasma membrane (GO:0009897)	427	12	2.05	+	5.86	1.23e-06	8.51e-05
membrane microdomain (GO:0098857)	323	10	1.55	+	6.46	4.39e-06	0.000285
membrane raft (GO:0045121)	322	10	1.54	+	6.48	4.27e-06	0.000287
membrane region (GO:0098589)	336	10	1.61	+	6.21	6.15e-06	0.000387
cytoplasm (GO:0005737)	11476	77	55.04	+	1.4	6.9e-06	0.000421
Bcl-2 family protein complex (GO:0097136)	6	3	0.03	+	> 100	8.68e-06	0.000514
receptor complex (GO:0043235)	524	12	2.51	+	4.78	9.45e-06	0.000544
side of membrane (GO:0098552)	626	13	3	+	4.33	1.09e-05	0.00061
perikaryon (GO:0043204)	153	7	0.73	+	9.54	1.17e-05	0.000639
phagocytic cup (GO:0001891)	27	4	0.13	+	30.89	1.39e-05	0.000738
intracellular (GO:0005622)	14473	88	69.41	+	1.27	1.73e-05	0.000894
tertiary granule (GO:0070820)	164	7	0.79	+	8.9	1.81e-05	0.000909
cellular anatomical entity (GO:0110165)	18628	100	89.34	+	1.12	2.43e-05	0.00119
cell junction (GO:0030054)	1365	19	6.55	+	2.9	2.6e-05	0.00125
collagen-containing extracellular matrix (GO:0062023)	407	10	1.95	+	5.12	3.08e-05	0.00138
neuron projection (GO:0043005)	1379	19	6.61	+	2.87	2.98e-05	0.0014
protein-containing complex (GO:0032991)	5484	46	26.3	+	1.75	3.06e-05	0.0014
membrane-bounded organelle (GO:0043227)	12584	80	60.35	+	1.33	3.45e-05	0.00151
plasma membrane region (GO:0098590)	1157	17	5.55	+	3.06	3.79e-05	0.00159
cell leading edge (GO:0031252)	417	10	2	+	5	3.76e-05	0.00161
intracellular organelle (GO:0043229)	12678	80	60.8	+	1.32	5.2e-05	0.00214
cellular_component (GO:0005575)	18818	100	90.25	+	1.11	5.9e-05	0.00229
extracellular matrix (GO:0031012)	533	11	2.56	+	4.3	5.75e-05	0.00232
Unclassified (UNCLASSIFIED)	2033	0	9.75	-	< 0.01	5.9e-05	0.00233
extracellular exosome (GO:0070062)	2098	24	10.06	+	2.39	6.87e-05	0.00261
extracellular vesicle (GO:1903561)	2119	24	10.16	+	2.36	7.43e-05	0.00277
extracellular organelle (GO:0043230)	2124	24	10.19	+	2.36	7.58e-05	0.00278
transcription factor complex (GO:0005667)	367	9	1.76	+	5.11	7.93e-05	0.00285
secretory granule membrane (GO:0030667)	301	8	1.44	+	5.54	0.000117	0.00415
BAK complex (GO:0097145)	2	2	0.01	+	> 100	0.000134	0.00459
CSF1-CSF1R complex (GO:1990682)	2	2	0.01	+	> 100	0.000134	0.00467
specific granule (GO:0042581)	160	6	0.77	+	7.82	0.000146	0.00489
membrane (GO:0016020)	9854	66	47.26	+	1.4	0.000184	0.00599
tertiary granule lumen (GO:1904724)	55	4	0.26	+	15.16	0.000182	0.00601
core-binding factor complex (GO:0016513)	3	2	0.01	+	> 100	0.000223	0.00715
ruffle (GO:0001726)	176	6	0.84	+	7.11	0.00024	0.00756
specific granule lumen (GO:0035580)	62	4	0.3	+	13.45	0.000281	0.0087
postsynapse (GO:0098794)	644	11	3.09	+	3.56	0.000292	0.0089
membrane-enclosed lumen (GO:0031974)	5870	45	28.15	+	1.6	0.000332	0.00969
intracellular organelle lumen (GO:0070013)	5870	45	28.15	+	1.6	0.000332	0.00983
organelle lumen (GO:0043233)	5870	45	28.15	+	1.6	0.000332	0.00997
actin filament (GO:0005884)	123	5	0.59	+	8.48	0.000373	0.0107
site of polarized growth (GO:0030427)	194	6	0.93	+	6.45	0.000397	0.0113
lamellipodium (GO:0030027)	198	6	0.95	+	6.32	0.000442	0.0124
phagocytic vesicle (GO:0045335)	134	5	0.64	+	7.78	0.000543	0.015
phagocytic vesicle membrane (GO:0030670)	76	4	0.36	+	10.97	0.000585	0.0159
caveola (GO:0005901)	81	4	0.39	+	10.3	0.000736	0.0198
apical part of cell (GO:0045177)	400	8	1.92	+	4.17	0.000755	0.02
endoplasmic reticulum lumen (GO:0005788)	308	7	1.48	+	4.74	0.000788	0.0206
basolateral plasma membrane (GO:0016323)	223	6	1.07	+	5.61	0.00081	0.0209
perinuclear region of cytoplasm (GO:0048471)	734	11	3.52	+	3.12	0.000853	0.0215
dendrite (GO:0030425)	619	10	2.97	+	3.37	0.000848	0.0216
dendritic tree (GO:0097447)	621	10	2.98	+	3.36	0.000868	0.0216
SCAR complex (GO:0031209)	8	2	0.04	+	52.13	0.00099	0.024
organelle (GO:0043226)	13710	81	65.75	+	1.23	0.000987	0.0243
nuclear chromatin (GO:0000790)	1034	13	4.96	+	2.62	0.00141	0.0335
cytoplasmic vesicle membrane (GO:0030659)	782	11	3.75	+	2.93	0.00141	0.0338
vesicle membrane (GO:0012506)	803	11	3.85	+	2.86	0.00173	0.0406
vacuolar lumen (GO:0005775)	177	5	0.85	+	5.89	0.00181	0.042
catalytic complex (GO:1902494)	1386	0	6.65	-	< 0.01	0.00189	0.0433
chromatin (GO:0000785)	1214	14	5.82	+	2.4	0.00206	0.046
nuclear matrix (GO:0016363)	108	4	0.52	+	7.72	0.00205	0.0463
plasma membrane raft (GO:0044853)	110	4	0.53	+	7.58	0.00218	0.0483
growth cone (GO:0030426)	186	5	0.89	+	5.61	0.00224	0.049

## Sheet: 94 I-N genes_BP_CB-9dpi
94 common genes_Immune-Nervous-Systems_Cerebellum-9dpi
GO biological process complete	Number of genes - REFLIST (20851)	Number of genes - Analyzed (94)	Expected	Over/under-represented	Fold Enrichment	raw P-value	FDR
nervous system development (GO:0007399)	2373	94	11.38	+	8.26	5.59e-80	8.9e-76
immune system process (GO:0002376)	2807	94	13.46	+	7.13	2.23e-77	1.77e-73
neurogenesis (GO:0022008)	1664	75	7.98	+	9.4	6.05e-60	3.21e-56
system development (GO:0048731)	4439	96	21.29	+	4.51	1.08e-58	4.3e-55
multicellular organism development (GO:0007275)	5064	96	24.29	+	3.95	2.53e-53	8.06e-50
cellular developmental process (GO:0048869)	3822	89	18.33	+	4.86	9.24e-53	2.45e-49
cell differentiation (GO:0030154)	3729	88	17.88	+	4.92	3.75e-52	7.46e-49
anatomical structure development (GO:0048856)	5451	97	26.14	+	3.71	3.74e-52	8.52e-49
generation of neurons (GO:0048699)	1562	67	7.49	+	8.94	3.15e-50	5.57e-47
developmental process (GO:0032502)	5901	97	28.3	+	3.43	7.05e-49	1.12e-45
regulation of developmental process (GO:0050793)	2624	76	12.58	+	6.04	3.08e-47	4.47e-44
regulation of immune system process (GO:0002682)	1681	64	8.06	+	7.94	2.86e-44	3.8e-41
regulation of cell population proliferation (GO:0042127)	1645	63	7.89	+	7.99	1.53e-43	1.88e-40
regulation of multicellular organismal development (GO:2000026)	2065	67	9.9	+	6.77	1.25e-42	1.43e-39
regulation of multicellular organismal process (GO:0051239)	3183	77	15.27	+	5.04	1.65e-42	1.76e-39
response to external stimulus (GO:0009605)	2449	70	11.75	+	5.96	1.25e-41	1.25e-38
hematopoietic or lymphoid organ development (GO:0048534)	621	45	2.98	+	15.11	1.11e-40	1.04e-37
multicellular organismal process (GO:0032501)	7014	96	33.64	+	2.85	4.46e-40	3.94e-37
immune system development (GO:0002520)	658	45	3.16	+	14.26	1.25e-39	1.04e-36
cell activation (GO:0001775)	1062	52	5.09	+	10.21	1.38e-39	1.1e-36
regulation of cell differentiation (GO:0045595)	1841	62	8.83	+	7.02	1.86e-39	1.41e-36
hemopoiesis (GO:0030097)	571	43	2.74	+	15.7	2.26e-39	1.64e-36
cell development (GO:0048468)	1623	59	7.78	+	7.58	7.06e-39	4.89e-36
leukocyte activation (GO:0045321)	915	48	4.39	+	10.94	1.91e-37	1.27e-34
animal organ development (GO:0048513)	3212	73	15.4	+	4.74	2.07e-37	1.32e-34
positive regulation of multicellular organismal process (GO:0051240)	1771	59	8.49	+	6.95	8.16e-37	5e-34
positive regulation of cellular process (GO:0048522)	5516	87	26.45	+	3.29	1.25e-36	7.35e-34
positive regulation of biological process (GO:0048518)	6252	90	29.98	+	3	6.47e-36	3.68e-33
positive regulation of cellular metabolic process (GO:0031325)	3383	73	16.22	+	4.5	6.76e-36	3.71e-33
positive regulation of metabolic process (GO:0009893)	3691	75	17.7	+	4.24	1.38e-35	7.31e-33
positive regulation of developmental process (GO:0051094)	1390	53	6.67	+	7.95	3.75e-35	1.93e-32
inflammatory response (GO:0006954)	502	38	2.41	+	15.78	1.5e-34	7.48e-32
immune response (GO:0006955)	1869	58	8.96	+	6.47	2.1e-34	1.01e-31
regulation of localization (GO:0032879)	2808	67	13.47	+	4.98	2.24e-34	1.05e-31
positive regulation of response to stimulus (GO:0048584)	2477	64	11.88	+	5.39	2.58e-34	1.17e-31
positive regulation of immune system process (GO:0002684)	1160	49	5.56	+	8.81	4.49e-34	1.99e-31
positive regulation of cell population proliferation (GO:0008284)	926	45	4.44	+	10.13	1.87e-33	8.04e-31
regulation of cell death (GO:0010941)	1698	55	8.14	+	6.75	3.66e-33	1.53e-30
central nervous system development (GO:0007417)	989	45	4.74	+	9.49	2.84e-32	1.16e-29
regulation of cell migration (GO:0030334)	873	43	4.19	+	10.27	4.82e-32	1.92e-29
negative regulation of cellular process (GO:0048523)	4795	79	23	+	3.44	5.24e-32	2.04e-29
positive regulation of cell migration (GO:0030335)	519	36	2.49	+	14.46	2.27e-31	8.62e-29
defense response (GO:0006952)	1352	49	6.48	+	7.56	4.33e-31	1.6e-28
regulation of cell motility (GO:2000145)	938	43	4.5	+	9.56	8.2e-31	2.9e-28
regulation of response to stimulus (GO:0048583)	4334	75	20.79	+	3.61	8.19e-31	2.97e-28
response to stress (GO:0006950)	3612	70	17.32	+	4.04	8.64e-31	2.99e-28
positive regulation of nitrogen compound metabolic process (GO:0051173)	3219	67	15.44	+	4.34	9.04e-31	3e-28
response to chemical (GO:0042221)	4496	76	21.56	+	3.52	9e-31	3.05e-28
positive regulation of cell motility (GO:2000147)	545	36	2.61	+	13.77	1.15e-30	3.74e-28
negative regulation of biological process (GO:0048519)	5377	81	25.79	+	3.14	1.54e-30	4.92e-28
positive regulation of macromolecule metabolic process (GO:0010604)	3394	68	16.28	+	4.18	2.1e-30	6.55e-28
positive regulation of cellular component movement (GO:0051272)	561	36	2.69	+	13.38	3e-30	9.2e-28
positive regulation of locomotion (GO:0040017)	576	36	2.76	+	13.03	7.2e-30	2.16e-27
positive regulation of signal transduction (GO:0009967)	1702	52	8.16	+	6.37	8.24e-30	2.43e-27
regulation of locomotion (GO:0040012)	1010	43	4.84	+	8.88	1.5e-29	4.35e-27
regulation of cellular component organization (GO:0051128)	2529	60	12.13	+	4.95	1.54e-29	4.39e-27
regulation of cell communication (GO:0010646)	3529	68	16.92	+	4.02	2.27e-29	6.35e-27
regulation of cellular component movement (GO:0051270)	1022	43	4.9	+	8.77	2.39e-29	6.56e-27
response to organic substance (GO:0010033)	3026	64	14.51	+	4.41	2.79e-29	7.55e-27
regulation of anatomical structure morphogenesis (GO:0022603)	1098	44	5.27	+	8.36	2.95e-29	7.84e-27
regulation of programmed cell death (GO:0043067)	1573	50	7.54	+	6.63	3.08e-29	8.05e-27
positive regulation of cell communication (GO:0010647)	1853	53	8.89	+	5.96	4e-29	1.03e-26
regulation of signaling (GO:0023051)	3570	68	17.12	+	3.97	4.59e-29	1.16e-26
positive regulation of signaling (GO:0023056)	1862	53	8.93	+	5.94	5.04e-29	1.25e-26
cellular response to chemical stimulus (GO:0070887)	2937	63	14.09	+	4.47	5.23e-29	1.28e-26
cell surface receptor signaling pathway (GO:0007166)	2483	59	11.91	+	4.95	6.1e-29	1.47e-26
response to biotic stimulus (GO:0009607)	1356	47	6.5	+	7.23	8.21e-29	1.95e-26
multi-organism process (GO:0051704)	2842	62	13.63	+	4.55	8.44e-29	1.98e-26
regulation of apoptotic process (GO:0042981)	1553	49	7.45	+	6.58	2.05e-28	4.73e-26
positive regulation of transport (GO:0051050)	1010	42	4.84	+	8.67	2.11e-28	4.81e-26
regulation of cell adhesion (GO:0030155)	701	37	3.36	+	11.01	2.98e-28	6.69e-26
response to other organism (GO:0051707)	1330	46	6.38	+	7.21	4.47e-28	9.88e-26
positive regulation of intracellular signal transduction (GO:1902533)	1031	42	4.94	+	8.49	4.64e-28	9.99e-26
response to stimulus (GO:0050896)	8534	93	40.93	+	2.27	4.6e-28	1e-25
response to external biotic stimulus (GO:0043207)	1332	46	6.39	+	7.2	4.75e-28	1.01e-25
leukocyte migration (GO:0050900)	372	30	1.78	+	16.82	9.07e-28	1.9e-25
leukocyte differentiation (GO:0002521)	343	29	1.65	+	17.63	2.26e-27	4.67e-25
regulation of signal transduction (GO:0009966)	3142	63	15.07	+	4.18	2.31e-27	4.73e-25
regulation of biological quality (GO:0065008)	4106	70	19.69	+	3.55	2.67e-27	5.39e-25
regulation of cell development (GO:0060284)	960	40	4.6	+	8.69	5.86e-27	1.17e-24
regulation of neurogenesis (GO:0050767)	834	38	4	+	9.5	7.57e-27	1.49e-24
regulation of transport (GO:0051049)	1887	51	9.05	+	5.64	1.08e-26	2.1e-24
regulation of cellular metabolic process (GO:0031323)	6263	82	30.04	+	2.73	1.09e-26	2.1e-24
regulation of hemopoiesis (GO:1903706)	460	31	2.21	+	14.05	1.7e-26	3.23e-24
negative regulation of multicellular organismal process (GO:0051241)	1210	43	5.8	+	7.41	1.74e-26	3.27e-24
positive regulation of cell differentiation (GO:0045597)	990	40	4.75	+	8.42	1.79e-26	3.32e-24
positive regulation of protein metabolic process (GO:0051247)	1724	49	8.27	+	5.93	2.04e-26	3.73e-24
gliogenesis (GO:0042063)	225	25	1.08	+	23.17	2.7e-26	4.89e-24
locomotion (GO:0040011)	1305	44	6.26	+	7.03	2.89e-26	5.17e-24
regulation of nervous system development (GO:0051960)	943	39	4.52	+	8.62	4.09e-26	7.24e-24
neuron differentiation (GO:0030182)	1018	40	4.88	+	8.19	4.93e-26	8.63e-24
regulation of protein metabolic process (GO:0051246)	2832	59	13.58	+	4.34	6.08e-26	1.05e-23
anatomical structure morphogenesis (GO:0009653)	2177	53	10.44	+	5.08	8.3e-26	1.42e-23
regulation of primary metabolic process (GO:0080090)	6055	80	29.04	+	2.75	9.27e-26	1.57e-23
chemotaxis (GO:0006935)	545	32	2.61	+	12.24	1.28e-25	2.15e-23
taxis (GO:0042330)	547	32	2.62	+	12.2	1.43e-25	2.37e-23
regulation of leukocyte differentiation (GO:1902105)	280	26	1.34	+	19.36	1.73e-25	2.84e-23
positive regulation of molecular function (GO:0044093)	1817	49	8.71	+	5.62	2.03e-25	3.29e-23
regulation of metabolic process (GO:0019222)	6733	83	32.29	+	2.57	2.32e-25	3.73e-23
positive regulation of cell adhesion (GO:0045785)	419	29	2.01	+	14.43	4.66e-25	7.43e-23
cell migration (GO:0016477)	950	38	4.56	+	8.34	6.77e-25	1.07e-22
positive regulation of cellular protein metabolic process (GO:0032270)	1616	46	7.75	+	5.94	1.39e-24	2.17e-22
regulation of cellular process (GO:0050794)	11071	98	53.1	+	1.85	1.64e-24	2.54e-22
regulation of cytokine production (GO:0001817)	724	34	3.47	+	9.79	2.86e-24	4.38e-22
cell motility (GO:0048870)	1066	39	5.11	+	7.63	3.08e-24	4.63e-22
localization of cell (GO:0051674)	1066	39	5.11	+	7.63	3.08e-24	4.67e-22
positive regulation of phosphorylation (GO:0042327)	1088	39	5.22	+	7.47	6.31e-24	9.39e-22
regulation of nitrogen compound metabolic process (GO:0051171)	5870	77	28.15	+	2.74	7.63e-24	1.13e-21
response to oxygen-containing compound (GO:1901700)	1599	45	7.67	+	5.87	8.88e-24	1.3e-21
regulation of intracellular signal transduction (GO:1902531)	1791	47	8.59	+	5.47	1e-23	1.45e-21
negative regulation of developmental process (GO:0051093)	959	37	4.6	+	8.04	1.13e-23	1.63e-21
defense response to other organism (GO:0098542)	962	37	4.61	+	8.02	1.26e-23	1.79e-21
regulation of cellular protein metabolic process (GO:0032268)	2661	55	12.76	+	4.31	1.48e-23	2.08e-21
regulation of cell activation (GO:0050865)	646	32	3.1	+	10.33	1.84e-23	2.57e-21
movement of cell or subcellular component (GO:0006928)	1544	44	7.4	+	5.94	2.15e-23	2.98e-21
regulation of molecular function (GO:0065009)	3053	58	14.64	+	3.96	2.42e-23	3.32e-21
cellular response to stimulus (GO:0051716)	6782	81	32.53	+	2.49	3.39e-23	4.61e-21
signal transduction (GO:0007165)	5135	72	24.63	+	2.92	4.24e-23	5.68e-21
regulation of leukocyte activation (GO:0002694)	606	31	2.91	+	10.67	4.23e-23	5.71e-21
positive regulation of phosphate metabolic process (GO:0045937)	1158	39	5.55	+	7.02	5.58e-23	7.34e-21
positive regulation of phosphorus metabolic process (GO:0010562)	1158	39	5.55	+	7.02	5.58e-23	7.4e-21
response to lipid (GO:0033993)	866	35	4.15	+	8.43	5.95e-23	7.76e-21
regulation of response to external stimulus (GO:0032101)	1097	38	5.26	+	7.22	9.27e-23	1.2e-20
regulation of cell-cell adhesion (GO:0022407)	414	27	1.99	+	13.6	1.13e-22	1.45e-20
negative regulation of cell population proliferation (GO:0008285)	690	32	3.31	+	9.67	1.25e-22	1.59e-20
cell communication (GO:0007154)	5576	74	26.74	+	2.77	1.32e-22	1.67e-20
regulation of lymphocyte activation (GO:0051249)	523	29	2.51	+	11.56	1.67e-22	2.1e-20
regulation of macromolecule metabolic process (GO:0060255)	6183	77	29.65	+	2.6	2.52e-22	3.14e-20
negative regulation of cell differentiation (GO:0045596)	711	32	3.41	+	9.38	2.98e-22	3.68e-20
signaling (GO:0023052)	5473	73	26.25	+	2.78	3.06e-22	3.75e-20
cellular response to organic substance (GO:0071310)	2400	51	11.51	+	4.43	5.33e-22	6.48e-20
regulation of protein modification process (GO:0031399)	1873	46	8.98	+	5.12	5.56e-22	6.71e-20
regulation of biological process (GO:0050789)	11770	98	56.45	+	1.74	6.36e-22	7.61e-20
positive regulation of cellular component organization (GO:0051130)	1244	39	5.97	+	6.54	6.72e-22	7.99e-20
regulation of leukocyte cell-cell adhesion (GO:1903037)	307	24	1.47	+	16.3	6.84e-22	8.07e-20
positive regulation of protein phosphorylation (GO:0001934)	1013	36	4.86	+	7.41	7.72e-22	9.05e-20
leukocyte activation involved in immune response (GO:0002366)	618	30	2.96	+	10.12	1.02e-21	1.19e-19
cell activation involved in immune response (GO:0002263)	622	30	2.98	+	10.06	1.22e-21	1.41e-19
regulation of phosphorylation (GO:0042325)	1623	43	7.78	+	5.52	1.35e-21	1.54e-19
regulation of neuron death (GO:1901214)	319	24	1.53	+	15.69	1.59e-21	1.81e-19
neuron development (GO:0048666)	824	33	3.95	+	8.35	1.83e-21	2.07e-19
regulation of protein phosphorylation (GO:0001932)	1454	41	6.97	+	5.88	1.86e-21	2.09e-19
regulation of peptide transport (GO:0090087)	759	32	3.64	+	8.79	1.97e-21	2.2e-19
positive regulation of catalytic activity (GO:0043085)	1466	41	7.03	+	5.83	2.5e-21	2.77e-19
astrocyte differentiation (GO:0048708)	55	15	0.26	+	56.87	2.96e-21	3.25e-19
response to organic cyclic compound (GO:0014070)	926	34	4.44	+	7.66	5.43e-21	5.92e-19
immune effector process (GO:0002252)	1080	36	5.18	+	6.95	6.04e-21	6.5e-19
positive regulation of protein modification process (GO:0031401)	1241	38	5.95	+	6.38	6.01e-21	6.51e-19
response to endogenous stimulus (GO:0009719)	1507	41	7.23	+	5.67	6.77e-21	7.23e-19
regulation of protein transport (GO:0051223)	727	31	3.49	+	8.89	7.03e-21	7.47e-19
regulation of phosphate metabolic process (GO:0019220)	1818	44	8.72	+	5.05	1.19e-20	1.26e-18
regulation of phosphorus metabolic process (GO:0051174)	1819	44	8.72	+	5.04	1.22e-20	1.27e-18
positive regulation of hemopoiesis (GO:1903708)	192	20	0.92	+	21.72	1.35e-20	1.4e-18
regulation of catalytic activity (GO:0050790)	2376	49	11.4	+	4.3	2.01e-20	2.08e-18
response to cytokine (GO:0034097)	1122	36	5.38	+	6.69	2.04e-20	2.1e-18
positive regulation of cytokine production (GO:0001819)	458	26	2.2	+	11.84	2.11e-20	2.15e-18
lymphocyte differentiation (GO:0030098)	237	21	1.14	+	18.48	3e-20	3.04e-18
myeloid leukocyte activation (GO:0002274)	580	28	2.78	+	10.07	3.46e-20	3.49e-18
cell chemotaxis (GO:0060326)	203	20	0.97	+	20.54	3.72e-20	3.71e-18
leukocyte chemotaxis (GO:0030595)	139	18	0.67	+	27	3.71e-20	3.72e-18
regulation of immune response (GO:0050776)	1144	36	5.49	+	6.56	3.79e-20	3.75e-18
regulation of establishment of protein localization (GO:0070201)	774	31	3.71	+	8.35	4.03e-20	3.96e-18
positive regulation of cell activation (GO:0050867)	423	25	2.03	+	12.32	5.09e-20	4.98e-18
regulation of vasculature development (GO:1901342)	329	23	1.58	+	14.58	5.71e-20	5.55e-18
positive regulation of response to external stimulus (GO:0032103)	594	28	2.85	+	9.83	6.34e-20	6.12e-18
lymphocyte activation (GO:0046649)	379	24	1.82	+	13.2	6.97e-20	6.69e-18
head development (GO:0060322)	793	31	3.8	+	8.15	7.91e-20	7.54e-18
regulation of angiogenesis (GO:0045765)	297	22	1.42	+	15.45	1.26e-19	1.2e-17
cellular response to cytokine stimulus (GO:0071345)	1031	34	4.94	+	6.88	1.4e-19	1.32e-17
positive regulation of leukocyte differentiation (GO:1902107)	151	18	0.72	+	24.86	1.44e-19	1.35e-17
brain development (GO:0007420)	748	30	3.59	+	8.36	1.79e-19	1.67e-17
homeostatic process (GO:0042592)	1661	41	7.97	+	5.15	2.2e-19	2.03e-17
positive regulation of leukocyte cell-cell adhesion (GO:1903039)	224	20	1.07	+	18.62	2.25e-19	2.08e-17
regulation of protein localization (GO:0032880)	1050	34	5.04	+	6.75	2.43e-19	2.22e-17
biological regulation (GO:0065007)	12470	98	59.81	+	1.64	2.63e-19	2.39e-17
positive regulation of leukocyte activation (GO:0002696)	409	24	1.96	+	12.24	3.69e-19	3.34e-17
secretion by cell (GO:0032940)	998	33	4.79	+	6.89	5.17e-19	4.65e-17
positive regulation of lymphocyte activation (GO:0051251)	367	23	1.76	+	13.07	5.67e-19	5.07e-17
negative regulation of cell death (GO:0060548)	1006	33	4.82	+	6.84	6.53e-19	5.81e-17
regulation of T cell activation (GO:0050863)	323	22	1.55	+	14.2	6.83e-19	6.04e-17
homeostasis of number of cells (GO:0048872)	205	19	0.98	+	19.33	1.02e-18	8.94e-17
secretion (GO:0046903)	1114	34	5.34	+	6.36	1.43e-18	1.25e-16
glial cell differentiation (GO:0010001)	174	18	0.83	+	21.57	1.47e-18	1.28e-16
positive regulation of protein transport (GO:0051222)	436	24	2.09	+	11.48	1.49e-18	1.29e-16
export from cell (GO:0140352)	1042	33	5	+	6.6	1.82e-18	1.57e-16
positive regulation of nervous system development (GO:0051962)	554	26	2.66	+	9.79	1.87e-18	1.6e-16
cellular component morphogenesis (GO:0032989)	825	30	3.96	+	7.58	2.47e-18	2.11e-16
regulation of chemotaxis (GO:0050920)	217	19	1.04	+	18.26	2.73e-18	2.31e-16
regulation of mononuclear cell proliferation (GO:0032944)	218	19	1.05	+	18.17	2.96e-18	2.49e-16
cellular response to oxygen-containing compound (GO:1901701)	1074	33	5.15	+	6.41	4.37e-18	3.67e-16
response to bacterium (GO:0009617)	704	28	3.38	+	8.29	4.56e-18	3.81e-16
astrocyte development (GO:0014002)	37	12	0.18	+	67.62	5.64e-18	4.68e-16
positive regulation of cell-cell adhesion (GO:0022409)	268	20	1.29	+	15.56	5.99e-18	4.94e-16
regulation of leukocyte proliferation (GO:0070663)	229	19	1.1	+	17.3	6.95e-18	5.71e-16
myeloid cell differentiation (GO:0030099)	230	19	1.1	+	17.22	7.5e-18	6.12e-16
tube development (GO:0035295)	861	30	4.13	+	7.27	7.71e-18	6.27e-16
cell morphogenesis (GO:0000902)	721	28	3.46	+	8.1	8.29e-18	6.7e-16
positive regulation of establishment of protein localization (GO:1904951)	474	24	2.27	+	10.56	9.16e-18	7.37e-16
regulation of MAPK cascade (GO:0043408)	729	28	3.5	+	8.01	1.09e-17	8.74e-16
positive regulation of MAPK cascade (GO:0043410)	543	25	2.6	+	9.6	1.46e-17	1.16e-15
cellular component organization (GO:0016043)	5620	68	26.95	+	2.52	1.75e-17	1.39e-15
positive regulation of kinase activity (GO:0033674)	614	26	2.94	+	8.83	2.07e-17	1.63e-15
regulation of leukocyte migration (GO:0002685)	205	18	0.98	+	18.31	2.18e-17	1.71e-15
regulation of secretion (GO:0051046)	826	29	3.96	+	7.32	2.55e-17	1.99e-15
glial cell development (GO:0021782)	110	15	0.53	+	28.43	3.01e-17	2.34e-15
response to molecule of bacterial origin (GO:0002237)	340	21	1.63	+	12.88	3.04e-17	2.35e-15
positive regulation of cell development (GO:0010720)	563	25	2.7	+	9.26	3.29e-17	2.53e-15
regulation of secretion by cell (GO:1903530)	768	28	3.68	+	7.6	4e-17	3.06e-15
regulation of peptide secretion (GO:0002791)	509	24	2.44	+	9.83	4.28e-17	3.27e-15
regulation of lymphocyte proliferation (GO:0050670)	216	18	1.04	+	17.38	5.16e-17	3.91e-15
negative regulation of immune system process (GO:0002683)	458	23	2.2	+	10.47	5.77e-17	4.36e-15
positive regulation of cell death (GO:0010942)	712	27	3.41	+	7.91	6.37e-17	4.79e-15
regulation of gliogenesis (GO:0014013)	120	15	0.58	+	26.06	9.84e-17	7.36e-15
cellular response to biotic stimulus (GO:0071216)	225	18	1.08	+	16.68	1.01e-16	7.51e-15
myeloid leukocyte migration (GO:0097529)	121	15	0.58	+	25.85	1.1e-16	8.17e-15
cellular component organization or biogenesis (GO:0071840)	5810	68	27.86	+	2.44	1.12e-16	8.26e-15
tube morphogenesis (GO:0035239)	662	26	3.17	+	8.19	1.19e-16	8.73e-15
tissue development (GO:0009888)	1777	39	8.52	+	4.58	1.2e-16	8.79e-15
gland development (GO:0048732)	419	22	2.01	+	10.95	1.24e-16	9.05e-15
regulation of protein secretion (GO:0050708)	479	23	2.3	+	10.01	1.46e-16	1.06e-14
response to lipopolysaccharide (GO:0032496)	324	20	1.55	+	12.87	1.9e-16	1.37e-14
positive regulation of neurogenesis (GO:0050769)	487	23	2.34	+	9.85	2.06e-16	1.48e-14
negative regulation of apoptotic process (GO:0043066)	900	29	4.32	+	6.72	2.28e-16	1.63e-14
response to steroid hormone (GO:0048545)	329	20	1.58	+	12.68	2.51e-16	1.79e-14
apoptotic process (GO:0006915)	907	29	4.35	+	6.67	2.78e-16	1.97e-14
positive regulation of transferase activity (GO:0051347)	691	26	3.31	+	7.85	3.21e-16	2.26e-14
cellular response to molecule of bacterial origin (GO:0071219)	201	17	0.96	+	17.64	3.25e-16	2.28e-14
positive regulation of biosynthetic process (GO:0009891)	2051	41	9.84	+	4.17	3.51e-16	2.45e-14
negative regulation of programmed cell death (GO:0043069)	916	29	4.39	+	6.6	3.57e-16	2.49e-14
localization (GO:0051179)	5768	67	27.66	+	2.42	4.03e-16	2.79e-14
positive regulation of secretion (GO:0051047)	446	22	2.14	+	10.29	4.3e-16	2.97e-14
positive regulation of immune response (GO:0050778)	847	28	4.06	+	6.89	4.5e-16	3.09e-14
glial cell activation (GO:0061900)	39	11	0.19	+	58.81	5.33e-16	3.64e-14
positive regulation of angiogenesis (GO:0045766)	170	16	0.82	+	19.62	5.45e-16	3.71e-14
regulation of lymphocyte differentiation (GO:0045619)	171	16	0.82	+	19.51	5.93e-16	4.02e-14
positive regulation of leukocyte migration (GO:0002687)	138	15	0.66	+	22.66	6.63e-16	4.45e-14
response to wounding (GO:0009611)	578	24	2.77	+	8.66	6.61e-16	4.46e-14
positive regulation of peptide secretion (GO:0002793)	303	19	1.45	+	13.07	8.89e-16	5.93e-14
positive regulation of chemotaxis (GO:0050921)	141	15	0.68	+	22.18	8.89e-16	5.95e-14
myeloid cell homeostasis (GO:0002262)	111	14	0.53	+	26.3	9.85e-16	6.54e-14
regulation of neuron apoptotic process (GO:0043523)	216	17	1.04	+	16.41	9.94e-16	6.57e-14
programmed cell death (GO:0012501)	1038	30	4.98	+	6.03	1.06e-15	6.96e-14
neuroinflammatory response (GO:0150076)	42	11	0.2	+	54.61	1.07e-15	7.04e-14
regulation of T cell differentiation (GO:0045580)	143	15	0.69	+	21.87	1.08e-15	7.04e-14
positive regulation of cellular biosynthetic process (GO:0031328)	2019	40	9.68	+	4.13	1.29e-15	8.39e-14
visual system development (GO:0150063)	361	20	1.73	+	11.55	1.35e-15	8.73e-14
positive regulation of secretion by cell (GO:1903532)	415	21	1.99	+	10.55	1.35e-15	8.74e-14
positive regulation of gene expression (GO:0010628)	2029	40	9.73	+	4.11	1.52e-15	9.77e-14
animal organ morphogenesis (GO:0009887)	974	29	4.67	+	6.21	1.69e-15	1.08e-13
sensory system development (GO:0048880)	366	20	1.76	+	11.39	1.74e-15	1.11e-13
neuron projection development (GO:0031175)	679	25	3.26	+	7.68	2.14e-15	1.36e-13
cell death (GO:0008219)	1073	30	5.15	+	5.83	2.5e-15	1.58e-13
positive regulation of vasculature development (GO:1904018)	190	16	0.91	+	17.56	2.76e-15	1.74e-13
cellular response to lipopolysaccharide (GO:0071222)	192	16	0.92	+	17.38	3.22e-15	2.01e-13
response to hormone (GO:0009725)	918	28	4.4	+	6.36	3.23e-15	2.01e-13
regulation of myeloid cell differentiation (GO:0045637)	233	17	1.12	+	15.21	3.22e-15	2.02e-13
cytokine-mediated signaling pathway (GO:0019221)	694	25	3.33	+	7.51	3.47e-15	2.15e-13
microglial cell activation (GO:0001774)	31	10	0.15	+	67.26	3.84e-15	2.36e-13
leukocyte activation involved in inflammatory response (GO:0002269)	31	10	0.15	+	67.26	3.84e-15	2.37e-13
positive regulation of protein secretion (GO:0050714)	281	18	1.35	+	13.36	3.87e-15	2.37e-13
leukocyte homeostasis (GO:0001776)	70	12	0.34	+	35.74	4.45e-15	2.72e-13
response to drug (GO:0042493)	1018	29	4.88	+	5.94	5.14e-15	3.13e-13
regulation of epithelial cell proliferation (GO:0050678)	338	19	1.62	+	11.72	5.85e-15	3.55e-13
positive regulation of neuron death (GO:1901216)	99	13	0.47	+	27.38	6.87e-15	4.14e-13
macrophage activation (GO:0042116)	51	11	0.24	+	44.97	6.92e-15	4.16e-13
positive regulation of gliogenesis (GO:0014015)	73	12	0.35	+	34.28	6.99e-15	4.19e-13
regulation of ERK1 and ERK2 cascade (GO:0070372)	292	18	1.4	+	12.85	7.25e-15	4.32e-13
intracellular signal transduction (GO:0035556)	1698	36	8.14	+	4.42	8.08e-15	4.8e-13
positive regulation of T cell activation (GO:0050870)	206	16	0.99	+	16.19	8.99e-15	5.32e-13
positive regulation of apoptotic process (GO:0043065)	655	24	3.14	+	7.64	9.51e-15	5.61e-13
regulation of biosynthetic process (GO:0009889)	4291	56	20.58	+	2.72	1.05e-14	6.16e-13
positive regulation of programmed cell death (GO:0043068)	660	24	3.17	+	7.58	1.12e-14	6.54e-13
regulation of response to stress (GO:0080134)	1516	34	7.27	+	4.68	1.19e-14	6.96e-13
positive regulation of protein kinase activity (GO:0045860)	537	22	2.58	+	8.54	1.67e-14	9.72e-13
cell projection organization (GO:0030030)	1159	30	5.56	+	5.4	1.83e-14	1.06e-12
regulation of cytokine biosynthetic process (GO:0042035)	108	13	0.52	+	25.1	1.92e-14	1.11e-12
regulation of cellular biosynthetic process (GO:0031326)	4212	55	20.2	+	2.72	2.24e-14	1.29e-12
sensory organ development (GO:0007423)	555	22	2.66	+	8.27	3.19e-14	1.83e-12
cellular process (GO:0009987)	14616	99	70.1	+	1.41	3.28e-14	1.87e-12
regulated exocytosis (GO:0045055)	695	24	3.33	+	7.2	3.33e-14	1.9e-12
innate immune response (GO:0045087)	774	25	3.71	+	6.73	3.81e-14	2.16e-12
plasma membrane bounded cell projection organization (GO:0120036)	1114	29	5.34	+	5.43	4.86e-14	2.75e-12
epithelium development (GO:0060429)	1115	29	5.35	+	5.42	4.97e-14	2.8e-12
regulation of leukocyte chemotaxis (GO:0002688)	119	13	0.57	+	22.78	6.03e-14	3.38e-12
T cell activation (GO:0042110)	235	16	1.13	+	14.2	6.13e-14	3.43e-12
myeloid leukocyte mediated immunity (GO:0002444)	513	21	2.46	+	8.54	7.28e-14	4.06e-12
positive regulation of leukocyte chemotaxis (GO:0002690)	92	12	0.44	+	27.2	8.53e-14	4.72e-12
granulocyte migration (GO:0097530)	92	12	0.44	+	27.2	8.53e-14	4.73e-12
regulation of inflammatory response (GO:0050727)	345	18	1.65	+	10.88	1.1e-13	6.04e-12
cellular response to lipid (GO:0071396)	528	21	2.53	+	8.29	1.25e-13	6.85e-12
regulation of kinase activity (GO:0043549)	903	26	4.33	+	6	1.42e-13	7.77e-12
positive regulation of cytokine biosynthetic process (GO:0042108)	70	11	0.34	+	32.77	1.53e-13	8.35e-12
blood vessel morphogenesis (GO:0048514)	412	19	1.98	+	9.62	1.73e-13	9.42e-12
leukocyte mediated immunity (GO:0002443)	760	24	3.64	+	6.58	2.17e-13	1.18e-11
regulation of plasma membrane bounded cell projection organization (GO:0120035)	686	23	3.29	+	6.99	2.26e-13	1.22e-11
response to organonitrogen compound (GO:0010243)	1008	27	4.83	+	5.59	2.32e-13	1.25e-11
regulation of cytokine secretion (GO:0050707)	212	15	1.02	+	14.75	2.35e-13	1.26e-11
positive regulation of mononuclear cell proliferation (GO:0032946)	135	13	0.65	+	20.08	2.68e-13	1.43e-11
regulation of cell projection organization (GO:0031344)	695	23	3.33	+	6.9	2.94e-13	1.57e-11
T cell differentiation (GO:0030217)	137	13	0.66	+	19.79	3.19e-13	1.7e-11
regulation of gene expression (GO:0010468)	4483	55	21.5	+	2.56	3.31e-13	1.75e-11
positive regulation of inflammatory response (GO:0050729)	138	13	0.66	+	19.64	3.48e-13	1.84e-11
positive regulation of macromolecule biosynthetic process (GO:0010557)	1928	36	9.25	+	3.89	3.55e-13	1.86e-11
neutrophil mediated immunity (GO:0002446)	493	20	2.36	+	8.46	3.63e-13	1.9e-11
cell morphogenesis involved in differentiation (GO:0000904)	562	21	2.7	+	7.79	3.98e-13	2.08e-11
exocytosis (GO:0006887)	784	24	3.76	+	6.38	4.16e-13	2.16e-11
cell population proliferation (GO:0008283)	499	20	2.39	+	8.36	4.51e-13	2.32e-11
positive regulation of leukocyte proliferation (GO:0070665)	141	13	0.68	+	19.22	4.49e-13	2.33e-11
blood vessel development (GO:0001568)	499	20	2.39	+	8.36	4.51e-13	2.33e-11
regulation of epithelial cell migration (GO:0010632)	223	15	1.07	+	14.03	4.68e-13	2.41e-11
lymphocyte activation involved in immune response (GO:0002285)	109	12	0.52	+	22.96	5.4e-13	2.77e-11
regulation of reactive oxygen species metabolic process (GO:2000377)	184	14	0.88	+	15.86	6.19e-13	3.16e-11
negative regulation of cytokine production (GO:0001818)	276	16	1.32	+	12.09	6.33e-13	3.22e-11
granulocyte chemotaxis (GO:0071621)	81	11	0.39	+	28.32	6.5e-13	3.3e-11
neutrophil migration (GO:1990266)	82	11	0.39	+	27.97	7.35e-13	3.72e-11
negative regulation of response to stimulus (GO:0048585)	1648	33	7.9	+	4.18	7.5e-13	3.78e-11
cell part morphogenesis (GO:0032990)	520	20	2.49	+	8.02	9.35e-13	4.68e-11
regulation of chemokine production (GO:0032642)	84	11	0.4	+	27.3	9.34e-13	4.69e-11
vasculature development (GO:0001944)	521	20	2.5	+	8	9.67e-13	4.83e-11
positive regulation of protein serine/threonine kinase activity (GO:0071902)	341	17	1.64	+	10.39	1.13e-12	5.65e-11
regulation of neuron differentiation (GO:0045664)	670	22	3.21	+	6.85	1.22e-12	6.06e-11
cardiovascular system development (GO:0072358)	531	20	2.55	+	7.85	1.35e-12	6.69e-11
positive regulation of chemokine production (GO:0032722)	61	10	0.29	+	34.18	1.4e-12	6.93e-11
response to nitrogen compound (GO:1901698)	1091	27	5.23	+	5.16	1.43e-12	7.01e-11
regulation of growth (GO:0040008)	683	22	3.28	+	6.72	1.76e-12	8.65e-11
regulation of transferase activity (GO:0051338)	1017	26	4.88	+	5.33	2e-12	9.76e-11
myeloid leukocyte differentiation (GO:0002573)	124	12	0.59	+	20.18	2.21e-12	1.08e-10
regulation of defense response (GO:0031347)	769	23	3.69	+	6.24	2.22e-12	1.08e-10
eye development (GO:0001654)	357	17	1.71	+	9.93	2.28e-12	1.11e-10
regulation of phagocytosis (GO:0050764)	92	11	0.44	+	24.93	2.31e-12	1.12e-10
regulation of alpha-beta T cell activation (GO:0046634)	93	11	0.45	+	24.66	2.58e-12	1.24e-10
alpha-beta T cell activation (GO:0046631)	66	10	0.32	+	31.59	2.85e-12	1.37e-10
cellular response to endogenous stimulus (GO:0071495)	1225	28	5.88	+	4.77	3.21e-12	1.53e-10
positive regulation of ERK1 and ERK2 cascade (GO:0070374)	210	14	1.01	+	13.9	3.33e-12	1.59e-10
positive regulation of myeloid cell differentiation (GO:0045639)	96	11	0.46	+	23.89	3.54e-12	1.68e-10
positive regulation of lymphocyte differentiation (GO:0045621)	96	11	0.46	+	23.89	3.54e-12	1.68e-10
cell projection morphogenesis (GO:0048858)	498	19	2.39	+	7.96	4.26e-12	2.01e-10
granulocyte activation (GO:0036230)	499	19	2.39	+	7.94	4.41e-12	2.08e-10
leukocyte degranulation (GO:0043299)	503	19	2.41	+	7.88	5.04e-12	2.37e-10
morphogenesis of an epithelium (GO:0002009)	438	18	2.1	+	8.57	5.12e-12	2.4e-10
positive regulation of lymphocyte proliferation (GO:0050671)	134	12	0.64	+	18.67	5.16e-12	2.41e-10
positive regulation of reactive oxygen species metabolic process (GO:2000379)	100	11	0.48	+	22.94	5.32e-12	2.48e-10
regulation of mononuclear cell migration (GO:0071675)	48	9	0.23	+	39.1	6.63e-12	3.08e-10
regulation of cell morphogenesis (GO:0022604)	512	19	2.46	+	7.74	6.78e-12	3.14e-10
anatomical structure formation involved in morphogenesis (GO:0048646)	900	24	4.32	+	5.56	7.14e-12	3.3e-10
positive regulation of nucleobase-containing compound metabolic process (GO:0045935)	1909	34	9.16	+	3.71	7.58e-12	3.48e-10
negative regulation of leukocyte activation (GO:0002695)	179	13	0.86	+	15.14	7.57e-12	3.49e-10
neutrophil chemotaxis (GO:0030593)	74	10	0.35	+	28.18	7.98e-12	3.64e-10
myeloid cell activation involved in immune response (GO:0002275)	517	19	2.48	+	7.66	7.97e-12	3.65e-10
negative regulation of hemopoiesis (GO:1903707)	143	12	0.69	+	17.5	1.05e-11	4.78e-10
regulation of hydrolase activity (GO:0051336)	1290	28	6.19	+	4.53	1.07e-11	4.85e-10
positive regulation of defense response (GO:0031349)	460	18	2.21	+	8.16	1.12e-11	5.06e-10
positive regulation of epithelial cell migration (GO:0010634)	144	12	0.69	+	17.38	1.13e-11	5.11e-10
vesicle-mediated transport (GO:0016192)	1938	34	9.29	+	3.66	1.14e-11	5.14e-10
forebrain development (GO:0030900)	399	17	1.91	+	8.88	1.23e-11	5.54e-10
positive regulation of cytokine secretion (GO:0050715)	146	12	0.7	+	17.14	1.32e-11	5.89e-10
apoptotic signaling pathway (GO:0097190)	286	15	1.37	+	10.94	1.37e-11	6.11e-10
negative regulation of metabolic process (GO:0009892)	2959	42	14.19	+	2.96	1.44e-11	6.39e-10
alpha-beta T cell differentiation (GO:0046632)	53	9	0.25	+	35.41	1.47e-11	6.5e-10
negative regulation of macromolecule metabolic process (GO:0010605)	2698	40	12.94	+	3.09	1.51e-11	6.69e-10
positive regulation of hydrolase activity (GO:0051345)	769	22	3.69	+	5.97	1.68e-11	7.4e-10
regulation of multi-organism process (GO:0043900)	775	22	3.72	+	5.92	1.94e-11	8.55e-10
neutrophil degranulation (GO:0043312)	482	18	2.31	+	7.79	2.35e-11	1.03e-09
regulation of vesicle-mediated transport (GO:0060627)	552	19	2.65	+	7.18	2.37e-11	1.04e-09
lipopolysaccharide-mediated signaling pathway (GO:0031663)	35	8	0.17	+	47.66	2.56e-11	1.12e-09
wound healing (GO:0042060)	485	18	2.33	+	7.74	2.59e-11	1.13e-09
neutrophil activation involved in immune response (GO:0002283)	486	18	2.33	+	7.72	2.67e-11	1.16e-09
astrocyte activation (GO:0048143)	19	7	0.09	+	76.82	2.78e-11	1.21e-09
negative regulation of cell activation (GO:0050866)	200	13	0.96	+	13.55	2.81e-11	1.21e-09
positive regulation of neuron apoptotic process (GO:0043525)	58	9	0.28	+	32.36	3.03e-11	1.3e-09
neuron projection morphogenesis (GO:0048812)	490	18	2.35	+	7.66	3.04e-11	1.31e-09
regulation of protein kinase activity (GO:0045859)	795	22	3.81	+	5.77	3.14e-11	1.34e-09
plasma membrane bounded cell projection morphogenesis (GO:0120039)	494	18	2.37	+	7.6	3.46e-11	1.48e-09
neutrophil activation (GO:0042119)	495	18	2.37	+	7.58	3.57e-11	1.52e-09
regulation of myeloid leukocyte differentiation (GO:0002761)	122	11	0.59	+	18.8	3.89e-11	1.65e-09
regulation of macromolecule biosynthetic process (GO:0010556)	4068	49	19.51	+	2.51	3.91e-11	1.65e-09
negative regulation of nervous system development (GO:0051961)	310	15	1.49	+	10.09	4.05e-11	1.71e-09
epithelial tube morphogenesis (GO:0060562)	311	15	1.49	+	10.06	4.23e-11	1.78e-09
regulation of T cell proliferation (GO:0042129)	163	12	0.78	+	15.35	4.38e-11	1.84e-09
cellular homeostasis (GO:0019725)	895	23	4.29	+	5.36	4.37e-11	1.84e-09
regulation of alpha-beta T cell differentiation (GO:0046637)	62	9	0.3	+	30.27	5.19e-11	2.17e-09
endocrine system development (GO:0035270)	126	11	0.6	+	18.2	5.37e-11	2.24e-09
protein kinase B signaling (GO:0043491)	39	8	0.19	+	42.77	5.46e-11	2.27e-09
positive regulation of MAP kinase activity (GO:0043406)	262	14	1.26	+	11.14	5.48e-11	2.27e-09
camera-type eye development (GO:0043010)	317	15	1.52	+	9.87	5.47e-11	2.27e-09
regulation of cell shape (GO:0008360)	167	12	0.8	+	14.98	5.71e-11	2.36e-09
embryonic morphogenesis (GO:0048598)	583	19	2.8	+	6.8	5.86e-11	2.41e-09
regulation of neuron projection development (GO:0010975)	513	18	2.46	+	7.32	6.27e-11	2.58e-09
positive regulation of interleukin-6 production (GO:0032755)	94	10	0.45	+	22.18	6.98e-11	2.86e-09
cell adhesion (GO:0007155)	921	23	4.42	+	5.21	7.61e-11	3.11e-09
positive regulation of growth (GO:0045927)	271	14	1.3	+	10.77	8.39e-11	3.42e-09
regulation of leukocyte adhesion to vascular endothelial cell (GO:1904994)	23	7	0.11	+	63.46	8.48e-11	3.45e-09
response to toxic substance (GO:0009636)	523	18	2.51	+	7.18	8.5e-11	3.45e-09
biological adhesion (GO:0022610)	927	23	4.45	+	5.17	8.63e-11	3.48e-09
positive regulation of phagocytosis (GO:0050766)	66	9	0.32	+	28.43	8.62e-11	3.49e-09
CD4-positive, alpha-beta T cell activation (GO:0035710)	42	8	0.2	+	39.72	9.22e-11	3.71e-09
extrinsic apoptotic signaling pathway (GO:0097191)	97	10	0.47	+	21.5	9.28e-11	3.73e-09
regulation of response to cytokine stimulus (GO:0060759)	175	12	0.84	+	14.3	9.5e-11	3.8e-09
cellular chemical homeostasis (GO:0055082)	759	21	3.64	+	5.77	9.51e-11	3.8e-09
negative regulation of cellular metabolic process (GO:0031324)	2603	38	12.48	+	3.04	9.98e-11	3.97e-09
negative regulation of cell adhesion (GO:0007162)	278	14	1.33	+	10.5	1.16e-10	4.59e-09
interspecies interaction between organisms (GO:0044419)	853	22	4.09	+	5.38	1.17e-10	4.62e-09
regulation of organelle organization (GO:0033043)	1328	27	6.37	+	4.24	1.17e-10	4.62e-09
tissue remodeling (GO:0048771)	100	10	0.48	+	20.85	1.22e-10	4.83e-09
negative regulation of cell-cell adhesion (GO:0022408)	180	12	0.86	+	13.9	1.29e-10	5.08e-09
regulation of immune effector process (GO:0002697)	468	17	2.24	+	7.57	1.35e-10	5.31e-09
regulation of interleukin-6 production (GO:0032675)	140	11	0.67	+	16.38	1.54e-10	6.04e-09
negative regulation of leukocyte differentiation (GO:1902106)	103	10	0.49	+	20.24	1.6e-10	6.26e-09
positive regulation of transcription, DNA-templated (GO:0045893)	1561	29	7.49	+	3.87	1.63e-10	6.35e-09
symbiotic process (GO:0044403)	784	21	3.76	+	5.59	1.7e-10	6.59e-09
negative regulation of neurogenesis (GO:0050768)	289	14	1.39	+	10.1	1.88e-10	7.29e-09
negative regulation of nitrogen compound metabolic process (GO:0051172)	2403	36	11.52	+	3.12	1.92e-10	7.44e-09
axon development (GO:0061564)	412	16	1.98	+	8.1	1.95e-10	7.53e-09
response to peptide (GO:1901652)	480	17	2.3	+	7.38	1.97e-10	7.59e-09
regulation of cellular component biogenesis (GO:0044087)	968	23	4.64	+	4.95	1.98e-10	7.61e-09
response to abiotic stimulus (GO:0009628)	1161	25	5.57	+	4.49	2.09e-10	8e-09
response to glucocorticoid (GO:0051384)	146	11	0.7	+	15.71	2.35e-10	8.97e-09
tissue morphogenesis (GO:0048729)	564	18	2.7	+	6.65	2.77e-10	1.05e-08
enzyme linked receptor protein signaling pathway (GO:0007167)	722	20	3.46	+	5.78	2.79e-10	1.06e-08
negative regulation of lymphocyte activation (GO:0051250)	150	11	0.72	+	15.29	3.07e-10	1.17e-08
regulation of adaptive immune response based on somatic recombination of immune receptors built from immunoglobulin superfamily domains (GO:0002822)	151	11	0.72	+	15.19	3.29e-10	1.24e-08
regulation of DNA-binding transcription factor activity (GO:0051090)	434	16	2.08	+	7.69	4.06e-10	1.53e-08
positive regulation of RNA metabolic process (GO:0051254)	1745	30	8.37	+	3.58	4.53e-10	1.71e-08
humoral immune response (GO:0006959)	372	15	1.78	+	8.41	4.62e-10	1.74e-08
immune response-regulating signaling pathway (GO:0002764)	586	18	2.81	+	6.4	5.01e-10	1.88e-08
cell morphogenesis involved in neuron differentiation (GO:0048667)	442	16	2.12	+	7.55	5.24e-10	1.96e-08
regulation of protein serine/threonine kinase activity (GO:0071900)	514	17	2.47	+	6.9	5.43e-10	2.03e-08
negative regulation of protein metabolic process (GO:0051248)	1119	24	5.37	+	4.47	5.63e-10	2.09e-08
axonogenesis (GO:0007409)	378	15	1.81	+	8.27	5.71e-10	2.12e-08
reproductive process (GO:0022414)	1433	27	6.87	+	3.93	6.14e-10	2.28e-08
regulation of endothelial cell migration (GO:0010594)	161	11	0.77	+	14.25	6.23e-10	2.3e-08
reproduction (GO:0000003)	1436	27	6.89	+	3.92	6.43e-10	2.37e-08
positive regulation of nucleic acid-templated transcription (GO:1903508)	1657	29	7.95	+	3.65	6.46e-10	2.38e-08
positive regulation of RNA biosynthetic process (GO:1902680)	1658	29	7.95	+	3.65	6.55e-10	2.4e-08
chemical homeostasis (GO:0048878)	1128	24	5.41	+	4.44	6.58e-10	2.41e-08
response to corticosteroid (GO:0031960)	162	11	0.78	+	14.16	6.63e-10	2.42e-08
positive regulation of T cell differentiation (GO:0045582)	85	9	0.41	+	22.08	6.78e-10	2.47e-08
sensory organ morphogenesis (GO:0090596)	265	13	1.27	+	10.23	7.59e-10	2.76e-08
negative regulation of neuron death (GO:1901215)	213	12	1.02	+	11.75	8.03e-10	2.91e-08
cellular response to organonitrogen compound (GO:0071417)	605	18	2.9	+	6.2	8.21e-10	2.97e-08
positive regulation of DNA-binding transcription factor activity (GO:0051091)	267	13	1.28	+	10.15	8.29e-10	2.99e-08
regulation of adaptive immune response (GO:0002819)	166	11	0.8	+	13.82	8.46e-10	3.05e-08
positive regulation of myeloid leukocyte differentiation (GO:0002763)	58	8	0.28	+	28.76	9.26e-10	3.33e-08
regulation of cytokine production involved in immune response (GO:0002718)	89	9	0.43	+	21.09	9.87e-10	3.54e-08
negative regulation of cell development (GO:0010721)	332	14	1.59	+	8.79	1.06e-09	3.8e-08
positive regulation of interleukin-6 secretion (GO:2000778)	35	7	0.17	+	41.7	1.07e-09	3.83e-08
circulatory system development (GO:0072359)	874	21	4.19	+	5.01	1.15e-09	4.11e-08
activation of immune response (GO:0002253)	619	18	2.97	+	6.06	1.17e-09	4.15e-08
regulation of CD4-positive, alpha-beta T cell activation (GO:2000514)	60	8	0.29	+	27.8	1.18e-09	4.2e-08
positive regulation of cellular protein localization (GO:1903829)	335	14	1.61	+	8.71	1.19e-09	4.2e-08
defense response to bacterium (GO:0042742)	336	14	1.61	+	8.69	1.23e-09	4.34e-08
positive regulation of leukocyte adhesion to vascular endothelial cell (GO:1904996)	18	6	0.09	+	69.5	1.28e-09	4.49e-08
CD4-positive, alpha-beta T cell differentiation (GO:0043367)	36	7	0.17	+	40.54	1.28e-09	4.49e-08
heart valve development (GO:0003170)	61	8	0.29	+	27.35	1.33e-09	4.67e-08
positive regulation of alpha-beta T cell activation (GO:0046635)	61	8	0.29	+	27.35	1.33e-09	4.68e-08
regulation of MAP kinase activity (GO:0043405)	340	14	1.63	+	8.59	1.42e-09	4.96e-08
regulation of developmental growth (GO:0048638)	340	14	1.63	+	8.59	1.42e-09	4.97e-08
ion homeostasis (GO:0050801)	798	20	3.83	+	5.23	1.51e-09	5.26e-08
cellular divalent inorganic cation homeostasis (GO:0072503)	478	16	2.29	+	6.98	1.56e-09	5.42e-08
cation homeostasis (GO:0055080)	714	19	3.42	+	5.55	1.59e-09	5.49e-08
positive regulation of organelle organization (GO:0010638)	637	18	3.06	+	5.89	1.81e-09	6.26e-08
positive regulation of T cell proliferation (GO:0042102)	97	9	0.47	+	19.35	2e-09	6.88e-08
inorganic ion homeostasis (GO:0098771)	726	19	3.48	+	5.46	2.07e-09	7.13e-08
cellular cation homeostasis (GO:0030003)	645	18	3.09	+	5.82	2.19e-09	7.53e-08
regulation of nucleobase-containing compound metabolic process (GO:0019219)	4062	46	19.48	+	2.36	2.28e-09	7.82e-08
positive regulation of endothelial cell migration (GO:0010595)	101	9	0.48	+	18.58	2.78e-09	9.5e-08
divalent inorganic cation homeostasis (GO:0072507)	499	16	2.39	+	6.69	2.84e-09	9.67e-08
regulation of osteoclast differentiation (GO:0045670)	68	8	0.33	+	24.53	2.92e-09	9.96e-08
gland morphogenesis (GO:0022612)	102	9	0.49	+	18.4	3.01e-09	1.02e-07
reproductive structure development (GO:0048608)	429	15	2.06	+	7.29	3.02e-09	1.02e-07
cellular ion homeostasis (GO:0006873)	659	18	3.16	+	5.7	3.04e-09	1.03e-07
regulation of cellular macromolecule biosynthetic process (GO:2000112)	3931	45	18.85	+	2.39	3.07e-09	1.04e-07
positive regulation of nucleocytoplasmic transport (GO:0046824)	69	8	0.33	+	24.18	3.25e-09	1.09e-07
cellular response to nitrogen compound (GO:1901699)	662	18	3.17	+	5.67	3.26e-09	1.1e-07
reproductive system development (GO:0061458)	433	15	2.08	+	7.22	3.41e-09	1.14e-07
positive regulation of adaptive immune response based on somatic recombination of immune receptors built from immunoglobulin superfamily domains (GO:0002824)	104	9	0.5	+	18.04	3.53e-09	1.18e-07
regulation of ossification (GO:0030278)	193	11	0.93	+	11.88	3.79e-09	1.26e-07
positive regulation of nitric oxide biosynthetic process (GO:0045429)	43	7	0.21	+	33.94	3.85e-09	1.28e-07
regulation of production of molecular mediator of immune response (GO:0002700)	148	10	0.71	+	14.09	4.32e-09	1.44e-07
positive regulation of peptidase activity (GO:0010952)	196	11	0.94	+	11.7	4.41e-09	1.46e-07
positive regulation of nitric oxide metabolic process (GO:1904407)	44	7	0.21	+	33.17	4.45e-09	1.47e-07
regulation of RNA metabolic process (GO:0051252)	3808	44	18.26	+	2.41	4.48e-09	1.48e-07
transmembrane receptor protein tyrosine kinase signaling pathway (GO:0007169)	517	16	2.48	+	6.45	4.62e-09	1.52e-07
B cell differentiation (GO:0030183)	108	9	0.52	+	17.38	4.81e-09	1.58e-07
cellular calcium ion homeostasis (GO:0006874)	446	15	2.14	+	7.01	5.01e-09	1.65e-07
osteoclast differentiation (GO:0030316)	45	7	0.22	+	32.43	5.12e-09	1.68e-07
positive regulation of adaptive immune response (GO:0002821)	109	9	0.52	+	17.22	5.19e-09	1.7e-07
regulation of lymphocyte mediated immunity (GO:0002706)	153	10	0.73	+	13.63	5.84e-09	1.9e-07
regulation of CD4-positive, alpha-beta T cell differentiation (GO:0043370)	46	7	0.22	+	31.73	5.87e-09	1.91e-07
B cell activation (GO:0042113)	153	10	0.73	+	13.63	5.84e-09	1.91e-07
positive regulation of epithelial to mesenchymal transition (GO:0010718)	47	7	0.23	+	31.05	6.72e-09	2.18e-07
regulation of leukocyte mediated immunity (GO:0002703)	205	11	0.98	+	11.19	6.88e-09	2.22e-07
response to growth factor (GO:0070848)	532	16	2.55	+	6.27	6.84e-09	2.22e-07
transport (GO:0006810)	4535	48	21.75	+	2.21	7.14e-09	2.3e-07
calcium ion homeostasis (GO:0055074)	459	15	2.2	+	6.81	7.28e-09	2.34e-07
positive regulation of cellular component biogenesis (GO:0044089)	536	16	2.57	+	6.22	7.58e-09	2.44e-07
phagocytosis (GO:0006909)	325	13	1.56	+	8.34	8.03e-09	2.57e-07
axon guidance (GO:0007411)	264	12	1.27	+	9.48	8.07e-09	2.58e-07
telencephalon development (GO:0021537)	264	12	1.27	+	9.48	8.07e-09	2.58e-07
regeneration (GO:0031099)	159	10	0.76	+	13.11	8.27e-09	2.64e-07
positive regulation of mononuclear cell migration (GO:0071677)	26	6	0.12	+	48.12	8.33e-09	2.65e-07
system process (GO:0003008)	1979	30	9.49	+	3.16	8.41e-09	2.67e-07
regulation of transcription, DNA-templated (GO:0006355)	3478	41	16.68	+	2.46	8.42e-09	2.67e-07
regulation of nucleocytoplasmic transport (GO:0046822)	116	9	0.56	+	16.18	8.63e-09	2.73e-07
neuron projection guidance (GO:0097485)	267	12	1.28	+	9.37	9.11e-09	2.87e-07
positive regulation of intracellular protein transport (GO:0090316)	161	10	0.77	+	12.95	9.26e-09	2.92e-07
developmental growth (GO:0048589)	396	14	1.9	+	7.37	9.28e-09	2.92e-07
T-helper cell differentiation (GO:0042093)	27	6	0.13	+	46.34	1.01e-08	3.17e-07
CD4-positive, alpha-beta T cell differentiation involved in immune response (GO:0002294)	27	6	0.13	+	46.34	1.01e-08	3.18e-07
activation of protein kinase activity (GO:0032147)	332	13	1.59	+	8.16	1.02e-08	3.19e-07
cellular response to organic cyclic compound (GO:0071407)	548	16	2.63	+	6.09	1.03e-08	3.19e-07
cellular response to peptide (GO:1901653)	332	13	1.59	+	8.16	1.02e-08	3.2e-07
immune response-activating signal transduction (GO:0002757)	549	16	2.63	+	6.08	1.05e-08	3.27e-07
regulation of cytokine-mediated signaling pathway (GO:0001959)	164	10	0.79	+	12.71	1.09e-08	3.39e-07
growth (GO:0040007)	402	14	1.93	+	7.26	1.12e-08	3.45e-07
metal ion homeostasis (GO:0055065)	633	17	3.04	+	5.6	1.12e-08	3.47e-07
alpha-beta T cell activation involved in immune response (GO:0002287)	28	6	0.13	+	44.68	1.23e-08	3.77e-07
alpha-beta T cell differentiation involved in immune response (GO:0002293)	28	6	0.13	+	44.68	1.23e-08	3.78e-07
regulation of cellular protein localization (GO:1903827)	556	16	2.67	+	6	1.25e-08	3.84e-07
heart valve morphogenesis (GO:0003179)	52	7	0.25	+	28.07	1.27e-08	3.89e-07
embryo development (GO:0009790)	1007	21	4.83	+	4.35	1.33e-08	4.06e-07
cellular response to drug (GO:0035690)	409	14	1.96	+	7.14	1.38e-08	4.2e-07
positive regulation of immune effector process (GO:0002699)	220	11	1.06	+	10.43	1.38e-08	4.21e-07
regulation of cellular localization (GO:0060341)	820	19	3.93	+	4.83	1.43e-08	4.33e-07
positive regulation of reactive oxygen species biosynthetic process (GO:1903428)	53	7	0.25	+	27.54	1.43e-08	4.35e-07
negative regulation of leukocyte cell-cell adhesion (GO:1903038)	125	9	0.6	+	15.01	1.59e-08	4.81e-07
positive regulation of cell growth (GO:0030307)	171	10	0.82	+	12.19	1.6e-08	4.83e-07
cellular metal ion homeostasis (GO:0006875)	568	16	2.72	+	5.87	1.67e-08	5.04e-07
neutrophil homeostasis (GO:0001780)	13	5	0.06	+	80.2	1.83e-08	5.5e-07
positive regulation of tumor necrosis factor production (GO:0032760)	88	8	0.42	+	18.96	1.9e-08	5.72e-07
establishment of localization (GO:0051234)	4665	48	22.37	+	2.15	2.07e-08	6.22e-07
regulation of nucleic acid-templated transcription (GO:1903506)	3544	41	17	+	2.41	2.13e-08	6.39e-07
regulation of RNA biosynthetic process (GO:2001141)	3549	41	17.02	+	2.41	2.18e-08	6.5e-07
regulation of reactive oxygen species biosynthetic process (GO:1903426)	90	8	0.43	+	18.53	2.24e-08	6.67e-07
positive regulation of tumor necrosis factor superfamily cytokine production (GO:1903557)	90	8	0.43	+	18.53	2.24e-08	6.68e-07
positive regulation of response to cytokine stimulus (GO:0060760)	57	7	0.27	+	25.61	2.27e-08	6.74e-07
mammary gland development (GO:0030879)	131	9	0.63	+	14.33	2.33e-08	6.91e-07
regulation of vascular endothelial growth factor production (GO:0010574)	32	6	0.15	+	39.1	2.48e-08	7.33e-07
T cell differentiation involved in immune response (GO:0002292)	32	6	0.15	+	39.1	2.48e-08	7.34e-07
positive regulation of cytosolic calcium ion concentration (GO:0007204)	296	12	1.42	+	8.45	2.73e-08	8.04e-07
positive regulation of proteolysis (GO:0045862)	362	13	1.74	+	7.49	2.75e-08	8.08e-07
negative regulation of cell communication (GO:0010648)	1371	24	6.58	+	3.65	2.78e-08	8.18e-07
peptide secretion (GO:0002790)	182	10	0.87	+	11.46	2.8e-08	8.2e-07
positive regulation of developmental growth (GO:0048639)	182	10	0.87	+	11.46	2.8e-08	8.21e-07
negative regulation of signaling (GO:0023057)	1375	24	6.59	+	3.64	2.94e-08	8.59e-07
regulation of nitric oxide biosynthetic process (GO:0045428)	60	7	0.29	+	24.33	3.14e-08	9.16e-07
negative regulation of signal transduction (GO:0009968)	1271	23	6.1	+	3.77	3.18e-08	9.27e-07
positive regulation of hormone metabolic process (GO:0032352)	15	5	0.07	+	69.5	3.28e-08	9.52e-07
positive regulation of nitric-oxide synthase biosynthetic process (GO:0051770)	15	5	0.07	+	69.5	3.28e-08	9.53e-07
protein phosphorylation (GO:0006468)	965	20	4.63	+	4.32	3.45e-08	9.99e-07
embryonic organ development (GO:0048568)	443	14	2.12	+	6.59	3.62e-08	1.05e-06
regulation of intracellular protein transport (GO:0033157)	243	11	1.17	+	9.44	3.67e-08	1.06e-06
regulation of protein import into nucleus (GO:0042306)	63	7	0.3	+	23.17	4.28e-08	1.23e-06
positive regulation of peptidyl-tyrosine phosphorylation (GO:0050731)	192	10	0.92	+	10.86	4.53e-08	1.3e-06
adaptive immune response (GO:0002250)	613	16	2.94	+	5.44	4.68e-08	1.34e-06
T cell activation involved in immune response (GO:0002286)	64	7	0.31	+	22.81	4.73e-08	1.35e-06
viral process (GO:0016032)	701	17	3.36	+	5.06	4.8e-08	1.37e-06
positive regulation of epithelial cell proliferation (GO:0050679)	194	10	0.93	+	10.75	4.97e-08	1.42e-06
negative regulation of gene expression (GO:0010629)	1766	27	8.47	+	3.19	4.97e-08	1.42e-06
regulation of interferon-gamma production (GO:0032649)	101	8	0.48	+	16.52	5.18e-08	1.47e-06
positive regulation of interleukin-12 production (GO:0032735)	37	6	0.18	+	33.81	5.37e-08	1.52e-06
regulation of glial cell migration (GO:1903975)	17	5	0.08	+	61.33	5.53e-08	1.56e-06
positive regulation of chemokine secretion (GO:0090197)	17	5	0.08	+	61.33	5.53e-08	1.57e-06
regulation of protein complex assembly (GO:0043254)	459	14	2.2	+	6.36	5.54e-08	1.57e-06
regulation of peptidyl-tyrosine phosphorylation (GO:0050730)	254	11	1.22	+	9.03	5.65e-08	1.59e-06
positive regulation of protein complex assembly (GO:0031334)	254	11	1.22	+	9.03	5.65e-08	1.59e-06
multi-organism reproductive process (GO:0044703)	997	20	4.78	+	4.18	5.83e-08	1.64e-06
neutrophil clearance (GO:0097350)	5	4	0.02	+	> 100	6.04e-08	1.7e-06
angiogenesis (GO:0001525)	320	12	1.53	+	7.82	6.2e-08	1.74e-06
regulation of protein import (GO:1904589)	67	7	0.32	+	21.78	6.32e-08	1.77e-06
positive regulation of tyrosine phosphorylation of STAT protein (GO:0042531)	68	7	0.33	+	21.46	6.94e-08	1.93e-06
regulation of glial cell differentiation (GO:0045685)	68	7	0.33	+	21.46	6.94e-08	1.94e-06
mature B cell differentiation involved in immune response (GO:0002313)	18	5	0.09	+	57.92	7.04e-08	1.95e-06
regulation of chemokine secretion (GO:0090196)	18	5	0.09	+	57.92	7.04e-08	1.95e-06
regulation of tumor necrosis factor production (GO:0032680)	150	9	0.72	+	12.51	7.02e-08	1.95e-06
eye morphogenesis (GO:0048592)	151	9	0.72	+	12.43	7.41e-08	2.05e-06
positive regulation of transcription by RNA polymerase II (GO:0045944)	1223	22	5.87	+	3.75	7.48e-08	2.07e-06
negative regulation of neuron apoptotic process (GO:0043524)	152	9	0.73	+	12.35	7.82e-08	2.15e-06
endocrine pancreas development (GO:0031018)	40	6	0.19	+	31.28	8.15e-08	2.24e-06
positive regulation of NF-kappaB transcription factor activity (GO:0051092)	153	9	0.73	+	12.27	8.24e-08	2.26e-06
regulation of tumor necrosis factor superfamily cytokine production (GO:1903555)	153	9	0.73	+	12.27	8.24e-08	2.26e-06
regulation of nitric-oxide synthase biosynthetic process (GO:0051769)	19	5	0.09	+	54.87	8.86e-08	2.42e-06
T cell selection (GO:0045058)	41	6	0.2	+	30.51	9.31e-08	2.54e-06
regulation of cytoskeleton organization (GO:0051493)	560	15	2.69	+	5.59	9.29e-08	2.54e-06
positive regulation of response to wounding (GO:1903036)	72	7	0.35	+	20.27	9.98e-08	2.72e-06
immune response-regulating cell surface receptor signaling pathway (GO:0002768)	483	14	2.32	+	6.04	1.02e-07	2.77e-06
regulation of hormone metabolic process (GO:0032350)	42	6	0.2	+	29.79	1.06e-07	2.88e-06
cytokine production (GO:0001816)	158	9	0.76	+	11.88	1.07e-07	2.9e-06
animal organ regeneration (GO:0031100)	73	7	0.35	+	19.99	1.09e-07	2.95e-06
positive regulation of tumor necrosis factor biosynthetic process (GO:0042535)	20	5	0.1	+	52.13	1.1e-07	2.97e-06
regulation of vascular endothelial cell proliferation (GO:1905562)	20	5	0.1	+	52.13	1.1e-07	2.98e-06
negative regulation of phosphate metabolic process (GO:0045936)	568	15	2.72	+	5.51	1.11e-07	2.99e-06
negative regulation of phosphorus metabolic process (GO:0010563)	569	15	2.73	+	5.5	1.14e-07	3.05e-06
regulation of cytosolic calcium ion concentration (GO:0051480)	340	12	1.63	+	7.36	1.17e-07	3.14e-06
positive regulation of protein import into nucleus (GO:0042307)	43	6	0.21	+	29.09	1.2e-07	3.22e-06
negative regulation of T cell activation (GO:0050868)	114	8	0.55	+	14.63	1.25e-07	3.34e-06
regulation of T cell mediated immunity (GO:0002709)	75	7	0.36	+	19.46	1.29e-07	3.45e-06
positive regulation of intracellular transport (GO:0032388)	216	10	1.04	+	9.65	1.3e-07	3.46e-06
negative regulation of cellular protein metabolic process (GO:0032269)	1050	20	5.04	+	3.97	1.33e-07	3.54e-06
negative regulation of T cell differentiation (GO:0045581)	44	6	0.21	+	28.43	1.36e-07	3.6e-06
B cell activation involved in immune response (GO:0002312)	44	6	0.21	+	28.43	1.36e-07	3.6e-06
positive regulation of cell adhesion mediated by integrin (GO:0033630)	21	5	0.1	+	49.65	1.36e-07	3.61e-06
positive regulation of monocyte chemotaxis (GO:0090026)	21	5	0.1	+	49.65	1.36e-07	3.61e-06
regulation of interleukin-8 production (GO:0032677)	76	7	0.36	+	19.2	1.41e-07	3.7e-06
lens development in camera-type eye (GO:0002088)	76	7	0.36	+	19.2	1.41e-07	3.71e-06
response to mechanical stimulus (GO:0009612)	218	10	1.05	+	9.56	1.41e-07	3.71e-06
cellular response to interferon-gamma (GO:0071346)	164	9	0.79	+	11.44	1.45e-07	3.8e-06
regulation of calcidiol 1-monooxygenase activity (GO:0060558)	7	4	0.03	+	> 100	1.57e-07	4.12e-06
negative regulation of macromolecule biosynthetic process (GO:0010558)	1506	24	7.22	+	3.32	1.58e-07	4.13e-06
cell-cell adhesion (GO:0098609)	502	14	2.41	+	5.82	1.61e-07	4.2e-06
positive regulation of multi-organism process (GO:0043902)	502	14	2.41	+	5.82	1.61e-07	4.21e-06
positive regulation of ion transport (GO:0043270)	284	11	1.36	+	8.08	1.67e-07	4.35e-06
developmental process involved in reproduction (GO:0003006)	964	19	4.62	+	4.11	1.72e-07	4.48e-06
positive regulation of protein import (GO:1904591)	46	6	0.22	+	27.2	1.73e-07	4.49e-06
positive regulation of alpha-beta T cell differentiation (GO:0046638)	46	6	0.22	+	27.2	1.73e-07	4.49e-06
regulation of tyrosine phosphorylation of STAT protein (GO:0042509)	79	7	0.38	+	18.48	1.8e-07	4.64e-06
negative regulation of molecular function (GO:0044092)	1177	21	5.64	+	3.72	1.79e-07	4.64e-06
chemokine-mediated signaling pathway (GO:0070098)	79	7	0.38	+	18.48	1.8e-07	4.65e-06
epithelial cell differentiation (GO:0030855)	679	16	3.26	+	4.91	1.82e-07	4.69e-06
regulation of protein kinase B signaling (GO:0051896)	225	10	1.08	+	9.27	1.86e-07	4.79e-06
cardiac chamber development (GO:0003205)	170	9	0.82	+	11.04	1.94e-07	4.96e-06
regulation of epithelial cell apoptotic process (GO:1904035)	80	7	0.38	+	18.24	1.95e-07	5e-06
positive regulation of macrophage migration (GO:1905523)	23	5	0.11	+	45.33	2.02e-07	5.15e-06
B cell homeostasis (GO:0001782)	23	5	0.11	+	45.33	2.02e-07	5.16e-06
regulation of actin cytoskeleton organization (GO:0032956)	359	12	1.72	+	6.97	2.06e-07	5.26e-06
phosphorylation (GO:0016310)	1300	22	6.23	+	3.53	2.12e-07	5.4e-06
positive regulation of cell-substrate adhesion (GO:0010811)	123	8	0.59	+	13.56	2.16e-07	5.5e-06
regulation of cell adhesion mediated by integrin (GO:0033628)	48	6	0.23	+	26.06	2.18e-07	5.53e-06
biological_process (GO:0008150)	17780	100	85.27	+	1.17	2.21e-07	5.6e-06
Unclassified (UNCLASSIFIED)	3071	0	14.73	-	< 0.01	2.21e-07	5.61e-06
negative regulation of protein modification process (GO:0031400)	604	15	2.9	+	5.18	2.4e-07	6.06e-06
mature B cell differentiation (GO:0002335)	24	5	0.12	+	43.44	2.43e-07	6.12e-06
regulation of response to biotic stimulus (GO:0002831)	520	14	2.49	+	5.61	2.44e-07	6.15e-06
regulation of epithelial to mesenchymal transition (GO:0010717)	83	7	0.4	+	17.59	2.47e-07	6.2e-06
positive regulation of endopeptidase activity (GO:0010950)	177	9	0.85	+	10.6	2.68e-07	6.72e-06
response to axon injury (GO:0048678)	50	6	0.24	+	25.02	2.72e-07	6.81e-06
cardiac chamber morphogenesis (GO:0003206)	127	8	0.61	+	13.13	2.73e-07	6.82e-06
regulation of innate immune response (GO:0045088)	446	13	2.14	+	6.08	2.85e-07	7.11e-06
positive regulation of receptor signaling pathway via JAK-STAT (GO:0046427)	85	7	0.41	+	17.17	2.87e-07	7.15e-06
regulation of ion transport (GO:0043269)	703	16	3.37	+	4.75	2.88e-07	7.17e-06
regulation of endothelial cell proliferation (GO:0001936)	128	8	0.61	+	13.03	2.89e-07	7.18e-06
cytokine secretion (GO:0050663)	51	6	0.24	+	24.53	3.03e-07	7.51e-06
negative regulation of epithelial cell proliferation (GO:0050680)	129	8	0.62	+	12.93	3.05e-07	7.57e-06
negative regulation of cellular biosynthetic process (GO:0031327)	1565	24	7.51	+	3.2	3.16e-07	7.83e-06
regulation of peptidase activity (GO:0052547)	452	13	2.17	+	6	3.3e-07	8.15e-06
regulation of leukocyte apoptotic process (GO:2000106)	87	7	0.42	+	16.78	3.33e-07	8.2e-06
positive regulation of interleukin-1 beta production (GO:0032731)	52	6	0.25	+	24.06	3.36e-07	8.27e-06
lymphocyte homeostasis (GO:0002260)	52	6	0.25	+	24.06	3.36e-07	8.28e-06
modulation of chemical synaptic transmission (GO:0050804)	453	13	2.17	+	5.98	3.38e-07	8.29e-06
regulation of vitamin D biosynthetic process (GO:0060556)	9	4	0.04	+	92.67	3.38e-07	8.3e-06
cognition (GO:0050890)	306	11	1.47	+	7.5	3.42e-07	8.38e-06
regulation of trans-synaptic signaling (GO:0099177)	454	13	2.18	+	5.97	3.46e-07	8.46e-06
positive regulation of receptor signaling pathway via STAT (GO:1904894)	88	7	0.42	+	16.59	3.58e-07	8.71e-06
positive regulation of animal organ morphogenesis (GO:0110110)	88	7	0.42	+	16.59	3.58e-07	8.73e-06
regulation of interleukin-10 production (GO:0032653)	53	6	0.25	+	23.6	3.73e-07	9.05e-06
leukocyte cell-cell adhesion (GO:0007159)	53	6	0.25	+	23.6	3.73e-07	9.06e-06
negative regulation of lymphocyte differentiation (GO:0045620)	53	6	0.25	+	23.6	3.73e-07	9.07e-06
cell-cell signaling (GO:0007267)	1122	20	5.38	+	3.72	3.77e-07	9.12e-06
post-embryonic development (GO:0009791)	89	7	0.43	+	16.4	3.84e-07	9.26e-06
response to chemokine (GO:1990868)	89	7	0.43	+	16.4	3.84e-07	9.28e-06
cellular response to chemokine (GO:1990869)	89	7	0.43	+	16.4	3.84e-07	9.29e-06
regulation of hormone levels (GO:0010817)	542	14	2.6	+	5.39	3.97e-07	9.56e-06
response to interferon-gamma (GO:0034341)	186	9	0.89	+	10.09	4e-07	9.6e-06
positive regulation of osteoclast differentiation (GO:0045672)	27	5	0.13	+	38.61	4.07e-07	9.77e-06
female pregnancy (GO:0007565)	187	9	0.9	+	10.04	4.17e-07	9.99e-06
negative regulation of biosynthetic process (GO:0009890)	1593	24	7.64	+	3.14	4.35e-07	1.04e-05
erythrocyte homeostasis (GO:0034101)	91	7	0.44	+	16.04	4.43e-07	1.06e-05
positive regulation of interleukin-8 production (GO:0032757)	55	6	0.26	+	22.75	4.56e-07	1.09e-05
positive regulation of vascular endothelial growth factor production (GO:0010575)	28	5	0.13	+	37.23	4.78e-07	1.13e-05
regulation of monocyte chemotaxis (GO:0090025)	28	5	0.13	+	37.23	4.78e-07	1.14e-05
positive T cell selection (GO:0043368)	28	5	0.13	+	37.23	4.78e-07	1.14e-05
response to antibiotic (GO:0046677)	317	11	1.52	+	7.24	4.8e-07	1.14e-05
response to oxidative stress (GO:0006979)	391	12	1.88	+	6.4	4.98e-07	1.18e-05
regulation of cellular response to stress (GO:0080135)	735	16	3.53	+	4.54	5.14e-07	1.22e-05
regulation of transcription by RNA polymerase II (GO:0006357)	2250	29	10.79	+	2.69	5.17e-07	1.22e-05
chordate embryonic development (GO:0043009)	644	15	3.09	+	4.86	5.31e-07	1.25e-05
regulation of interleukin-1 production (GO:0032652)	94	7	0.45	+	15.53	5.44e-07	1.28e-05
regulation of interleukin-12 production (GO:0032655)	57	6	0.27	+	21.95	5.54e-07	1.3e-05
positive regulation of cell projection organization (GO:0031346)	395	12	1.89	+	6.33	5.53e-07	1.3e-05
regulation of interleukin-17 production (GO:0032660)	29	5	0.14	+	35.95	5.58e-07	1.31e-05
regulation of hormone biosynthetic process (GO:0046885)	29	5	0.14	+	35.95	5.58e-07	1.31e-05
regulation of interleukin-2 production (GO:0032663)	58	6	0.28	+	21.57	6.09e-07	1.42e-05
regulation of peptidyl-serine phosphorylation (GO:0033135)	142	8	0.68	+	11.75	6.11e-07	1.42e-05
epithelial cell development (GO:0002064)	197	9	0.94	+	9.53	6.33e-07	1.47e-05
regulation of metal ion transport (GO:0010959)	400	12	1.92	+	6.26	6.29e-07	1.47e-05
cellular response to stress (GO:0033554)	1751	25	8.4	+	2.98	6.34e-07	1.47e-05
positive regulation of hormone biosynthetic process (GO:0046886)	11	4	0.05	+	75.82	6.41e-07	1.48e-05
positive regulation of glial cell migration (GO:1903977)	11	4	0.05	+	75.82	6.41e-07	1.49e-05
regulation of tumor necrosis factor biosynthetic process (GO:0042534)	30	5	0.14	+	34.75	6.49e-07	1.5e-05
T cell migration (GO:0072678)	30	5	0.14	+	34.75	6.49e-07	1.5e-05
regulation of actin filament-based process (GO:0032970)	402	12	1.93	+	6.22	6.62e-07	1.53e-05
regulation of epithelial cell differentiation (GO:0030856)	144	8	0.69	+	11.58	6.75e-07	1.55e-05
positive regulation of interleukin-1 production (GO:0032732)	60	6	0.29	+	20.85	7.32e-07	1.68e-05
embryo development ending in birth or egg hatching (GO:0009792)	661	15	3.17	+	4.73	7.31e-07	1.68e-05
actin filament-based process (GO:0030029)	575	14	2.76	+	5.08	7.91e-07	1.81e-05
regulation of lipid metabolic process (GO:0019216)	411	12	1.97	+	6.09	8.31e-07	1.9e-05
positive regulation of chemokine (C-X-C motif) ligand 2 production (GO:2000343)	12	4	0.06	+	69.5	8.51e-07	1.94e-05
regulation of neuroinflammatory response (GO:0150077)	32	5	0.15	+	32.58	8.65e-07	1.97e-05
regulation of T cell cytokine production (GO:0002724)	32	5	0.15	+	32.58	8.65e-07	1.97e-05
positive regulation of lipid metabolic process (GO:0045834)	149	8	0.71	+	11.2	8.63e-07	1.97e-05
adaptive immune response based on somatic recombination of immune receptors built from immunoglobulin superfamily domains (GO:0002460)	270	10	1.29	+	7.72	9.3e-07	2.11e-05
actin cytoskeleton organization (GO:0030036)	497	13	2.38	+	5.45	9.34e-07	2.12e-05
regulation of lymphocyte migration (GO:2000401)	63	6	0.3	+	19.86	9.55e-07	2.16e-05
regulation of B cell proliferation (GO:0030888)	63	6	0.3	+	19.86	9.55e-07	2.16e-05
negative regulation of cellular macromolecule biosynthetic process (GO:2000113)	1423	22	6.82	+	3.22	9.61e-07	2.17e-05
defense response to Gram-positive bacterium (GO:0050830)	103	7	0.49	+	14.17	9.72e-07	2.19e-05
tube formation (GO:0035148)	152	8	0.73	+	10.97	9.96e-07	2.23e-05
regulation of hormone secretion (GO:0046883)	272	10	1.3	+	7.67	9.92e-07	2.23e-05
positive regulation of interleukin-2 production (GO:0032743)	33	5	0.16	+	31.59	9.92e-07	2.24e-05
mesenchymal cell differentiation (GO:0048762)	152	8	0.73	+	10.97	9.96e-07	2.24e-05
cellular response to growth factor stimulus (GO:0071363)	502	13	2.41	+	5.4	1.04e-06	2.33e-05
activation of MAPK activity (GO:0000187)	154	8	0.74	+	10.83	1.09e-06	2.45e-05
regulation of vitamin metabolic process (GO:0030656)	13	4	0.06	+	64.16	1.11e-06	2.48e-05
regulation of cell growth (GO:0001558)	423	12	2.03	+	5.92	1.11e-06	2.48e-05
regulation of cell-substrate adhesion (GO:0010810)	212	9	1.02	+	8.85	1.14e-06	2.54e-05
regulation of dephosphorylation (GO:0035303)	213	9	1.02	+	8.81	1.18e-06	2.63e-05
positive regulation of lymphocyte mediated immunity (GO:0002708)	107	7	0.51	+	13.64	1.24e-06	2.75e-05
hindbrain development (GO:0030902)	157	8	0.75	+	10.62	1.26e-06	2.79e-05
cytoskeleton organization (GO:0007010)	1106	19	5.3	+	3.58	1.33e-06	2.95e-05
aging (GO:0007568)	282	10	1.35	+	7.39	1.36e-06	3.01e-05
mesenchyme development (GO:0060485)	217	9	1.04	+	8.65	1.37e-06	3.03e-05
T cell chemotaxis (GO:0010818)	14	4	0.07	+	59.57	1.42e-06	3.13e-05
positive regulation of neuroinflammatory response (GO:0150078)	14	4	0.07	+	59.57	1.42e-06	3.13e-05
regulation of superoxide metabolic process (GO:0090322)	36	5	0.17	+	28.96	1.46e-06	3.22e-05
cardiac septum development (GO:0003279)	110	7	0.53	+	13.27	1.47e-06	3.23e-05
multi-multicellular organism process (GO:0044706)	219	9	1.05	+	8.57	1.47e-06	3.24e-05
positive regulation of cell morphogenesis involved in differentiation (GO:0010770)	161	8	0.77	+	10.36	1.5e-06	3.3e-05
regulation of anatomical structure size (GO:0090066)	520	13	2.49	+	5.21	1.52e-06	3.34e-05
negative regulation of transcription, DNA-templated (GO:0045892)	1230	20	5.9	+	3.39	1.54e-06	3.37e-05
protein secretion (GO:0009306)	163	8	0.78	+	10.23	1.64e-06	3.59e-05
semi-lunar valve development (GO:1905314)	37	5	0.18	+	28.18	1.66e-06	3.6e-05
cellular response to amyloid-beta (GO:1904646)	37	5	0.18	+	28.18	1.66e-06	3.6e-05
inflammatory response to antigenic stimulus (GO:0002437)	37	5	0.18	+	28.18	1.66e-06	3.61e-05
regulation of intracellular transport (GO:0032386)	362	11	1.74	+	6.34	1.69e-06	3.67e-05
establishment of protein localization to extracellular region (GO:0035592)	164	8	0.79	+	10.17	1.72e-06	3.72e-05
regulation of chemokine (C-X-C motif) ligand 2 production (GO:2000341)	15	4	0.07	+	55.6	1.79e-06	3.87e-05
positive regulation of vascular endothelial cell proliferation (GO:1905564)	15	4	0.07	+	55.6	1.79e-06	3.87e-05
heart development (GO:0007507)	528	13	2.53	+	5.13	1.8e-06	3.87e-05
positive regulation of interleukin-6 biosynthetic process (GO:0045410)	15	4	0.07	+	55.6	1.79e-06	3.88e-05
negative regulation of neuron differentiation (GO:0045665)	225	9	1.08	+	8.34	1.83e-06	3.93e-05
lymphocyte migration (GO:0072676)	71	6	0.34	+	17.62	1.83e-06	3.94e-05
positive regulation of lymphocyte migration (GO:2000403)	38	5	0.18	+	27.44	1.87e-06	4e-05
receptor signaling pathway via JAK-STAT (GO:0007259)	38	5	0.18	+	27.44	1.87e-06	4.01e-05
MAPK cascade (GO:0000165)	366	11	1.76	+	6.27	1.87e-06	4.01e-05
positive regulation of neuron projection development (GO:0010976)	294	10	1.41	+	7.09	1.95e-06	4.17e-05
pancreas development (GO:0031016)	72	6	0.35	+	17.38	1.98e-06	4.22e-05
ventricular septum development (GO:0003281)	72	6	0.35	+	17.38	1.98e-06	4.22e-05
immune response-activating cell surface receptor signaling pathway (GO:0002429)	448	12	2.15	+	5.59	1.99e-06	4.24e-05
negative regulation of catalytic activity (GO:0043086)	817	16	3.92	+	4.08	2e-06	4.25e-05
ear development (GO:0043583)	228	9	1.09	+	8.23	2.03e-06	4.31e-05
positive regulation of calcidiol 1-monooxygenase activity (GO:0060559)	3	3	0.01	+	> 100	2.09e-06	4.41e-05
positive regulation of vitamin D biosynthetic process (GO:0060557)	3	3	0.01	+	> 100	2.09e-06	4.41e-05
positive regulation of response to macrophage colony-stimulating factor (GO:1903971)	3	3	0.01	+	> 100	2.09e-06	4.42e-05
negative regulation of alkaline phosphatase activity (GO:0010693)	3	3	0.01	+	> 100	2.09e-06	4.42e-05
receptor signaling pathway via STAT (GO:0097696)	39	5	0.19	+	26.73	2.1e-06	4.42e-05
positive regulation of cellular response to macrophage colony-stimulating factor stimulus (GO:1903974)	3	3	0.01	+	> 100	2.09e-06	4.43e-05
acute inflammatory response (GO:0002526)	73	6	0.35	+	17.14	2.13e-06	4.49e-05
positive regulation of protein kinase B signaling (GO:0051897)	170	8	0.82	+	9.81	2.22e-06	4.66e-05
regulation of chemokine biosynthetic process (GO:0045073)	16	4	0.08	+	52.13	2.23e-06	4.68e-05
response to hydrogen peroxide (GO:0042542)	118	7	0.57	+	12.37	2.3e-06	4.81e-05
protein localization to extracellular region (GO:0071692)	171	8	0.82	+	9.75	2.31e-06	4.84e-05
negative regulation of RNA metabolic process (GO:0051253)	1381	21	6.62	+	3.17	2.31e-06	4.84e-05
regulation of macrophage migration (GO:1905521)	40	5	0.19	+	26.06	2.35e-06	4.91e-05
regulation of pri-miRNA transcription by RNA polymerase II (GO:1902893)	41	5	0.2	+	25.43	2.63e-06	5.48e-05
hormone secretion (GO:0046879)	76	6	0.36	+	16.46	2.65e-06	5.53e-05
regulation of proteolysis (GO:0030162)	737	15	3.53	+	4.24	2.73e-06	5.68e-05
positive regulation of humoral immune response (GO:0002922)	17	4	0.08	+	49.06	2.75e-06	5.7e-05
post-embryonic animal organ development (GO:0048569)	17	4	0.08	+	49.06	2.75e-06	5.71e-05
camera-type eye morphogenesis (GO:0048593)	122	7	0.59	+	11.96	2.83e-06	5.87e-05
odontogenesis (GO:0042476)	122	7	0.59	+	11.96	2.83e-06	5.87e-05
cellular response to oxidative stress (GO:0034599)	238	9	1.14	+	7.88	2.85e-06	5.88e-05
positive regulation of neuron differentiation (GO:0045666)	383	11	1.84	+	5.99	2.87e-06	5.91e-05
cellular extravasation (GO:0045123)	42	5	0.2	+	24.82	2.93e-06	6.02e-05
positive regulation of glial cell differentiation (GO:0045687)	42	5	0.2	+	24.82	2.93e-06	6.03e-05
monocyte chemotaxis (GO:0002548)	42	5	0.2	+	24.82	2.93e-06	6.04e-05
negative regulation of nucleic acid-templated transcription (GO:1903507)	1284	20	6.16	+	3.25	2.95e-06	6.05e-05
negative regulation of immune effector process (GO:0002698)	123	7	0.59	+	11.87	2.98e-06	6.12e-05
negative regulation of RNA biosynthetic process (GO:1902679)	1286	20	6.17	+	3.24	3.02e-06	6.18e-05
regulation of tissue remodeling (GO:0034103)	78	6	0.37	+	16.04	3.06e-06	6.25e-05
regulation of phosphatase activity (GO:0010921)	178	8	0.85	+	9.37	3.08e-06	6.29e-05
cellular macromolecule metabolic process (GO:0044260)	5073	46	24.33	+	1.89	3.15e-06	6.43e-05
mammary gland morphogenesis (GO:0060443)	43	5	0.21	+	24.25	3.26e-06	6.64e-05
positive regulation of small GTPase mediated signal transduction (GO:0051057)	79	6	0.38	+	15.84	3.28e-06	6.67e-05
appendage development (GO:0048736)	180	8	0.86	+	9.27	3.33e-06	6.76e-05
positive regulation of steroid biosynthetic process (GO:0010893)	18	4	0.09	+	46.34	3.35e-06	6.77e-05
limb development (GO:0060173)	180	8	0.86	+	9.27	3.33e-06	6.77e-05
dendritic cell chemotaxis (GO:0002407)	18	4	0.09	+	46.34	3.35e-06	6.78e-05
negative regulation of cellular component movement (GO:0051271)	314	10	1.51	+	6.64	3.44e-06	6.96e-05
signal transduction by protein phosphorylation (GO:0023014)	391	11	1.88	+	5.87	3.47e-06	7.01e-05
positive regulation of NIK/NF-kappaB signaling (GO:1901224)	80	6	0.38	+	15.64	3.51e-06	7.06e-05
regulation of interleukin-1 beta production (GO:0032651)	80	6	0.38	+	15.64	3.51e-06	7.07e-05
response to extracellular stimulus (GO:0009991)	562	13	2.7	+	4.82	3.5e-06	7.07e-05
positive regulation of CD8-positive, alpha-beta T cell differentiation (GO:0043378)	4	3	0.02	+	> 100	3.64e-06	7.31e-05
urogenital system development (GO:0001655)	316	10	1.52	+	6.6	3.64e-06	7.31e-05
regulation of insulin secretion (GO:0050796)	183	8	0.88	+	9.12	3.75e-06	7.51e-05
cardiac ventricle development (GO:0003231)	128	7	0.61	+	11.4	3.84e-06	7.67e-05
embryonic epithelial tube formation (GO:0001838)	128	7	0.61	+	11.4	3.84e-06	7.68e-05
erythrocyte differentiation (GO:0030218)	82	6	0.39	+	15.26	4.01e-06	7.99e-05
positive regulation of lipid biosynthetic process (GO:0046889)	82	6	0.39	+	15.26	4.01e-06	8e-05
macrophage migration (GO:1905517)	19	4	0.09	+	43.9	4.04e-06	8.01e-05
positive regulation of protein localization to nucleus (GO:1900182)	82	6	0.39	+	15.26	4.01e-06	8.01e-05
regulation of protein localization to nucleus (GO:1900180)	129	7	0.62	+	11.31	4.03e-06	8.01e-05
heart morphogenesis (GO:0003007)	249	9	1.19	+	7.54	4.06e-06	8.06e-05
regulation of transmembrane transport (GO:0034762)	570	13	2.73	+	4.76	4.07e-06	8.07e-05
response to peptide hormone (GO:0043434)	398	11	1.91	+	5.76	4.1e-06	8.11e-05
odontogenesis of dentin-containing tooth (GO:0042475)	83	6	0.4	+	15.07	4.29e-06	8.46e-05
hormone transport (GO:0009914)	83	6	0.4	+	15.07	4.29e-06	8.48e-05
cell fate commitment (GO:0045165)	251	9	1.2	+	7.48	4.32e-06	8.53e-05
multicellular organismal homeostasis (GO:0048871)	323	10	1.55	+	6.46	4.39e-06	8.64e-05
response to progesterone (GO:0032570)	46	5	0.22	+	22.66	4.42e-06	8.68e-05
regulation of acute inflammatory response (GO:0002673)	46	5	0.22	+	22.66	4.42e-06	8.69e-05
negative regulation of myeloid cell differentiation (GO:0045638)	84	6	0.4	+	14.89	4.58e-06	8.98e-05
positive regulation of T cell cytokine production (GO:0002726)	20	4	0.1	+	41.7	4.82e-06	9.44e-05
negative regulation of CD4-positive, alpha-beta T cell differentiation (GO:0043371)	20	4	0.1	+	41.7	4.82e-06	9.45e-05
response to amyloid-beta (GO:1904645)	47	5	0.23	+	22.18	4.87e-06	9.52e-05
regulation of epidermis development (GO:0045682)	85	6	0.41	+	14.72	4.88e-06	9.52e-05
regulation of receptor signaling pathway via JAK-STAT (GO:0046425)	133	7	0.64	+	10.97	4.88e-06	9.53e-05
negative regulation of locomotion (GO:0040013)	328	10	1.57	+	6.36	5.01e-06	9.75e-05
regulation of lipid biosynthetic process (GO:0046890)	191	8	0.92	+	8.73	5.07e-06	9.87e-05
mononuclear cell migration (GO:0071674)	48	5	0.23	+	21.72	5.36e-06	0.000104
negative regulation of transcription by RNA polymerase II (GO:0000122)	885	16	4.24	+	3.77	5.44e-06	0.000106
epithelial tube formation (GO:0072175)	136	7	0.65	+	10.73	5.61e-06	0.000109
regulation of smooth muscle cell proliferation (GO:0048660)	136	7	0.65	+	10.73	5.61e-06	0.000109
positive regulation of leukocyte mediated immunity (GO:0002705)	136	7	0.65	+	10.73	5.61e-06	0.000109
response to reactive oxygen species (GO:0000302)	194	8	0.93	+	8.6	5.66e-06	0.000109
positive regulation of vitamin metabolic process (GO:0046136)	5	3	0.02	+	> 100	5.81e-06	0.000112
thymocyte apoptotic process (GO:0070242)	5	3	0.02	+	> 100	5.81e-06	0.000112
regulation of cellular response to macrophage colony-stimulating factor stimulus (GO:1903972)	5	3	0.02	+	> 100	5.81e-06	0.000112
regulation of response to macrophage colony-stimulating factor (GO:1903969)	5	3	0.02	+	> 100	5.81e-06	0.000112
thymus development (GO:0048538)	49	5	0.24	+	21.28	5.88e-06	0.000113
lymphocyte chemotaxis (GO:0048247)	49	5	0.24	+	21.28	5.88e-06	0.000113
negative regulation of striated muscle tissue development (GO:0045843)	49	5	0.24	+	21.28	5.88e-06	0.000113
positive regulation of smooth muscle cell proliferation (GO:0048661)	88	6	0.42	+	14.22	5.89e-06	0.000113
regulation of receptor signaling pathway via STAT (GO:1904892)	137	7	0.66	+	10.65	5.88e-06	0.000113
ossification (GO:0001503)	263	9	1.26	+	7.14	6.23e-06	0.000119
positive regulation of cytokine-mediated signaling pathway (GO:0001961)	50	5	0.24	+	20.85	6.45e-06	0.000123
negative regulation of muscle organ development (GO:0048635)	50	5	0.24	+	20.85	6.45e-06	0.000123
positive regulation of cysteine-type endopeptidase activity involved in apoptotic process (GO:0043280)	139	7	0.67	+	10.5	6.44e-06	0.000123
dendritic cell migration (GO:0036336)	22	4	0.11	+	37.91	6.74e-06	0.000128
response to nicotine (GO:0035094)	51	5	0.24	+	20.44	7.05e-06	0.000133
sex differentiation (GO:0007548)	267	9	1.28	+	7.03	7.01e-06	0.000133
negative regulation of nucleobase-containing compound metabolic process (GO:0045934)	1484	21	7.12	+	2.95	7e-06	0.000133
epithelial cell proliferation (GO:0050673)	91	6	0.44	+	13.75	7.07e-06	0.000134
regulation of cell cycle (GO:0051726)	1243	19	5.96	+	3.19	7.1e-06	0.000134
regulation of endopeptidase activity (GO:0052548)	423	11	2.03	+	5.42	7.19e-06	0.000136
response to hypoxia (GO:0001666)	343	10	1.65	+	6.08	7.33e-06	0.000138
regulation of blood vessel endothelial cell migration (GO:0043535)	92	6	0.44	+	13.6	7.5e-06	0.000141
negative regulation of secretion by cell (GO:1903531)	202	8	0.97	+	8.26	7.53e-06	0.000141
regulation of cellular amide metabolic process (GO:0034248)	425	11	2.04	+	5.4	7.51e-06	0.000141
negative regulation of muscle tissue development (GO:1901862)	52	5	0.25	+	20.05	7.7e-06	0.000144
regulation of interleukin-6 biosynthetic process (GO:0045408)	23	4	0.11	+	36.26	7.88e-06	0.000147
kidney development (GO:0001822)	271	9	1.3	+	6.92	7.87e-06	0.000147
positive regulation of endothelial cell proliferation (GO:0001938)	93	6	0.45	+	13.45	7.96e-06	0.000148
activation of cysteine-type endopeptidase activity involved in apoptotic process (GO:0006919)	93	6	0.45	+	13.45	7.96e-06	0.000149
cellular defense response (GO:0006968)	53	5	0.25	+	19.67	8.4e-06	0.000156
hematopoietic progenitor cell differentiation (GO:0002244)	94	6	0.45	+	13.31	8.43e-06	0.000157
common-partner SMAD protein phosphorylation (GO:0007182)	6	3	0.03	+	> 100	8.68e-06	0.000161
regulation of CD8-positive, alpha-beta T cell differentiation (GO:0043376)	6	3	0.03	+	> 100	8.68e-06	0.000161
leukocyte proliferation (GO:0070661)	95	6	0.46	+	13.17	8.93e-06	0.000166
negative regulation of alpha-beta T cell differentiation (GO:0046639)	24	4	0.12	+	34.75	9.16e-06	0.000169
regulation of macrophage activation (GO:0043030)	54	5	0.26	+	19.31	9.14e-06	0.000169
morphogenesis of embryonic epithelium (GO:0016331)	149	7	0.71	+	9.8	9.94e-06	0.000184
response to decreased oxygen levels (GO:0036293)	356	10	1.71	+	5.86	1e-05	0.000185
negative regulation of neuron projection development (GO:0010977)	150	7	0.72	+	9.73	1.04e-05	0.000191
limb morphogenesis (GO:0035108)	150	7	0.72	+	9.73	1.04e-05	0.000191
appendage morphogenesis (GO:0035107)	150	7	0.72	+	9.73	1.04e-05	0.000191
renal system development (GO:0072001)	281	9	1.35	+	6.68	1.04e-05	0.000192
ruffle organization (GO:0031529)	25	4	0.12	+	33.36	1.06e-05	0.000194
macrophage differentiation (GO:0030225)	25	4	0.12	+	33.36	1.06e-05	0.000194
negative regulation of cellular component organization (GO:0051129)	723	14	3.47	+	4.04	1.06e-05	0.000194
regulation of monooxygenase activity (GO:0032768)	56	5	0.27	+	18.62	1.08e-05	0.000197
positive regulation of blood vessel endothelial cell migration (GO:0043536)	56	5	0.27	+	18.62	1.08e-05	0.000197
regulation of B cell activation (GO:0050864)	213	8	1.02	+	7.83	1.09e-05	0.000199
cellular response to external stimulus (GO:0071496)	360	10	1.73	+	5.79	1.1e-05	0.000201
multicellular organismal reproductive process (GO:0048609)	830	15	3.98	+	3.77	1.11e-05	0.000202
regulation of protein localization to plasma membrane (GO:1903076)	99	6	0.47	+	12.64	1.12e-05	0.000203
regulation of cellular response to growth factor stimulus (GO:0090287)	284	9	1.36	+	6.61	1.13e-05	0.000206
response to virus (GO:0009615)	285	9	1.37	+	6.58	1.16e-05	0.000211
positive regulation of DNA binding (GO:0043388)	57	5	0.27	+	18.29	1.17e-05	0.000212
negative regulation of immune response (GO:0050777)	153	7	0.73	+	9.54	1.17e-05	0.000212
regulation of axon extension (GO:0030516)	100	6	0.48	+	12.51	1.18e-05	0.000213
positive regulation of microglial cell migration (GO:1904141)	7	3	0.03	+	89.36	1.24e-05	0.000221
positive regulation of interleukin-1 beta biosynthetic process (GO:0050725)	7	3	0.03	+	89.36	1.24e-05	0.000222
regulation of interleukin-1 beta biosynthetic process (GO:0050722)	7	3	0.03	+	89.36	1.24e-05	0.000222
positive regulation of NMDA glutamate receptor activity (GO:1904783)	7	3	0.03	+	89.36	1.24e-05	0.000222
post-embryonic camera-type eye development (GO:0031077)	7	3	0.03	+	89.36	1.24e-05	0.000222
negative regulation of phosphorylation (GO:0042326)	449	11	2.15	+	5.11	1.24e-05	0.000222
trachea formation (GO:0060440)	7	3	0.03	+	89.36	1.24e-05	0.000223
positive regulation of interleukin-1 biosynthetic process (GO:0045362)	7	3	0.03	+	89.36	1.24e-05	0.000223
regulation of interleukin-1 biosynthetic process (GO:0045360)	7	3	0.03	+	89.36	1.24e-05	0.000223
regulation of peptide hormone secretion (GO:0090276)	217	8	1.04	+	7.69	1.24e-05	0.000223
mammary gland epithelium development (GO:0061180)	58	5	0.28	+	17.98	1.26e-05	0.000225
positive regulation of protein localization to plasma membrane (GO:1903078)	58	5	0.28	+	17.98	1.26e-05	0.000226
positive regulation of cysteine-type endopeptidase activity (GO:2001056)	155	7	0.74	+	9.42	1.27e-05	0.000227
response to inorganic substance (GO:0010035)	541	12	2.59	+	4.62	1.29e-05	0.00023
multicellular organism reproduction (GO:0032504)	842	15	4.04	+	3.71	1.31e-05	0.000233
cellular protein modification process (GO:0006464)	3079	32	14.77	+	2.17	1.35e-05	0.00024
protein modification process (GO:0036211)	3079	32	14.77	+	2.17	1.35e-05	0.00024
positive regulation of cytokine production involved in immune response (GO:0002720)	59	5	0.28	+	17.67	1.37e-05	0.000242
supramolecular fiber organization (GO:0097435)	454	11	2.18	+	5.05	1.37e-05	0.000243
regulation of T cell differentiation in thymus (GO:0033081)	27	4	0.13	+	30.89	1.39e-05	0.000245
positive regulation of production of molecular mediator of immune response (GO:0002702)	103	6	0.49	+	12.15	1.38e-05	0.000245
negative regulation of myoblast differentiation (GO:0045662)	27	4	0.13	+	30.89	1.39e-05	0.000246
leukocyte apoptotic process (GO:0071887)	27	4	0.13	+	30.89	1.39e-05	0.000246
regulation of cysteine-type endopeptidase activity involved in apoptotic process (GO:0043281)	222	8	1.06	+	7.51	1.46e-05	0.000257
negative regulation of response to external stimulus (GO:0032102)	373	10	1.79	+	5.59	1.49e-05	0.000262
positive regulation of monooxygenase activity (GO:0032770)	28	4	0.13	+	29.79	1.59e-05	0.000278
positive regulation of steroid metabolic process (GO:0045940)	28	4	0.13	+	29.79	1.59e-05	0.000278
G protein-coupled receptor signaling pathway (GO:0007186)	1320	19	6.33	+	3	1.64e-05	0.000288
regulation of synapse organization (GO:0050807)	226	8	1.08	+	7.38	1.65e-05	0.000289
positive regulation of IRE1-mediated unfolded protein response (GO:1903896)	8	3	0.04	+	78.19	1.69e-05	0.000295
regulation of microglial cell migration (GO:1904139)	8	3	0.04	+	78.19	1.69e-05	0.000295
positive regulation of CD8-positive, alpha-beta T cell activation (GO:2001187)	8	3	0.04	+	78.19	1.69e-05	0.000296
B cell apoptotic process (GO:0001783)	8	3	0.04	+	78.19	1.69e-05	0.000296
positive regulation of peptidyl-serine phosphorylation (GO:0033138)	107	6	0.51	+	11.69	1.7e-05	0.000296
response to oxygen levels (GO:0070482)	380	10	1.82	+	5.49	1.74e-05	0.000302
negative regulation of secretion (GO:0051048)	228	8	1.09	+	7.32	1.76e-05	0.000305
negative regulation of CD4-positive, alpha-beta T cell activation (GO:2000515)	29	4	0.14	+	28.76	1.8e-05	0.000312
embryonic organ morphogenesis (GO:0048562)	303	9	1.45	+	6.19	1.86e-05	0.000323
neural tube formation (GO:0001841)	109	6	0.52	+	11.48	1.88e-05	0.000325
regulation of NIK/NF-kappaB signaling (GO:1901222)	109	6	0.52	+	11.48	1.88e-05	0.000325
neural tube development (GO:0021915)	166	7	0.8	+	8.79	1.95e-05	0.000336
positive regulation of pri-miRNA transcription by RNA polymerase II (GO:1902895)	30	4	0.14	+	27.8	2.03e-05	0.000349
positive regulation of acute inflammatory response (GO:0002675)	30	4	0.14	+	27.8	2.03e-05	0.00035
homeostasis of number of cells within a tissue (GO:0048873)	30	4	0.14	+	27.8	2.03e-05	0.00035
cardiac atrium morphogenesis (GO:0003209)	30	4	0.14	+	27.8	2.03e-05	0.00035
positive regulation of interferon-gamma production (GO:0032729)	65	5	0.31	+	16.04	2.12e-05	0.000364
positive regulation of protein localization to cell periphery (GO:1904377)	65	5	0.31	+	16.04	2.12e-05	0.000364
morphogenesis of a branching structure (GO:0001763)	169	7	0.81	+	8.64	2.17e-05	0.000373
regulation of alkaline phosphatase activity (GO:0010692)	9	3	0.04	+	69.5	2.25e-05	0.000384
cellular response to nicotine (GO:0071316)	9	3	0.04	+	69.5	2.25e-05	0.000385
postsynapse to nucleus signaling pathway (GO:0099527)	9	3	0.04	+	69.5	2.25e-05	0.000385
post-embryonic animal organ morphogenesis (GO:0048563)	9	3	0.04	+	69.5	2.25e-05	0.000385
blood vessel remodeling (GO:0001974)	31	4	0.15	+	26.9	2.28e-05	0.000389
positive regulation of T cell migration (GO:2000406)	31	4	0.15	+	26.9	2.28e-05	0.000389
regulation of type 2 immune response (GO:0002828)	31	4	0.15	+	26.9	2.28e-05	0.000389
regulation of synapse structure or activity (GO:0050803)	237	8	1.14	+	7.04	2.3e-05	0.000391
macromolecule metabolic process (GO:0043170)	6181	50	29.64	+	1.69	2.32e-05	0.000394
negative regulation of cell cycle (GO:0045786)	575	12	2.76	+	4.35	2.33e-05	0.000395
ovulation cycle (GO:0042698)	67	5	0.32	+	15.56	2.43e-05	0.000412
regulation of cell morphogenesis involved in differentiation (GO:0010769)	314	9	1.51	+	5.98	2.45e-05	0.000414
regulation of extent of cell growth (GO:0061387)	115	6	0.55	+	10.88	2.51e-05	0.000424
regulation of cellular extravasation (GO:0002691)	32	4	0.15	+	26.06	2.56e-05	0.000431
signal transduction in absence of ligand (GO:0038034)	32	4	0.15	+	26.06	2.56e-05	0.000432
extrinsic apoptotic signaling pathway in absence of ligand (GO:0097192)	32	4	0.15	+	26.06	2.56e-05	0.000432
ERBB signaling pathway (GO:0038127)	69	5	0.33	+	15.11	2.78e-05	0.000468
positive regulation of epithelial cell apoptotic process (GO:1904037)	33	4	0.16	+	25.27	2.86e-05	0.00048
regulation of keratinocyte proliferation (GO:0010837)	33	4	0.16	+	25.27	2.86e-05	0.000481
positive regulation of binding (GO:0051099)	177	7	0.85	+	8.25	2.89e-05	0.000485
cellular response to tumor necrosis factor (GO:0071356)	245	8	1.18	+	6.81	2.89e-05	0.000485
regulation of cysteine-type endopeptidase activity (GO:2000116)	245	8	1.18	+	6.81	2.89e-05	0.000485
regulation of apoptotic cell clearance (GO:2000425)	10	3	0.05	+	62.55	2.91e-05	0.000487
membranous septum morphogenesis (GO:0003149)	10	3	0.05	+	62.55	2.91e-05	0.000487
vagina development (GO:0060068)	10	3	0.05	+	62.55	2.91e-05	0.000488
intrinsic apoptotic signaling pathway in response to DNA damage (GO:0008630)	70	5	0.34	+	14.89	2.97e-05	0.000494
cellular response to hydrogen peroxide (GO:0070301)	70	5	0.34	+	14.89	2.97e-05	0.000495
regulation of response to wounding (GO:1903034)	178	7	0.85	+	8.2	2.99e-05	0.000498
negative regulation of transport (GO:0051051)	496	11	2.38	+	4.62	3.04e-05	0.000506
regulation of apoptotic signaling pathway (GO:2001233)	407	10	1.95	+	5.12	3.08e-05	0.000511
negative regulation of cell projection organization (GO:0031345)	179	7	0.86	+	8.15	3.1e-05	0.000514
regulation of body fluid levels (GO:0050878)	497	11	2.38	+	4.61	3.1e-05	0.000514
regulation of protein localization to cell periphery (GO:1904375)	120	6	0.58	+	10.43	3.15e-05	0.000522
positive regulation of Ras protein signal transduction (GO:0046579)	71	5	0.34	+	14.68	3.16e-05	0.000523
T cell homeostasis (GO:0043029)	34	4	0.16	+	24.53	3.18e-05	0.000525
regulation of system process (GO:0044057)	594	12	2.85	+	4.21	3.18e-05	0.000525
positive regulation of CD4-positive, alpha-beta T cell activation (GO:2000516)	34	4	0.16	+	24.53	3.18e-05	0.000526
negative regulation of protein phosphorylation (GO:0001933)	409	10	1.96	+	5.1	3.21e-05	0.000528
cardiac ventricle morphogenesis (GO:0003208)	72	5	0.35	+	14.48	3.37e-05	0.000555
response to morphine (GO:0043278)	35	4	0.17	+	23.83	3.53e-05	0.000578
negative regulation of interferon-gamma production (GO:0032689)	35	4	0.17	+	23.83	3.53e-05	0.000579
cellular response to interleukin-6 (GO:0071354)	35	4	0.17	+	23.83	3.53e-05	0.000579
regulation of natural killer cell activation (GO:0032814)	35	4	0.17	+	23.83	3.53e-05	0.00058
response to isoquinoline alkaloid (GO:0014072)	35	4	0.17	+	23.83	3.53e-05	0.00058
negative regulation of animal organ morphogenesis (GO:0110111)	35	4	0.17	+	23.83	3.53e-05	0.000581
cardiac septum morphogenesis (GO:0060411)	73	5	0.35	+	14.28	3.59e-05	0.000585
nervous system process (GO:0050877)	1398	19	6.7	+	2.83	3.59e-05	0.000585
cellular protein metabolic process (GO:0044267)	3704	35	17.76	+	1.97	3.58e-05	0.000585
response to lipoteichoic acid (GO:0070391)	11	3	0.05	+	56.87	3.7e-05	0.0006
leukocyte aggregation (GO:0070486)	11	3	0.05	+	56.87	3.7e-05	0.000601
positive regulation of MHC class II biosynthetic process (GO:0045348)	11	3	0.05	+	56.87	3.7e-05	0.000602
cellular response to lipoteichoic acid (GO:0071223)	11	3	0.05	+	56.87	3.7e-05	0.000602
negative regulation of vasculature development (GO:1901343)	124	6	0.59	+	10.09	3.76e-05	0.000609
regulation of phosphatidylinositol 3-kinase signaling (GO:0014066)	124	6	0.59	+	10.09	3.76e-05	0.00061
regulation of mitochondrial membrane permeability (GO:0046902)	74	5	0.35	+	14.09	3.82e-05	0.000618
negative regulation of production of molecular mediator of immune response (GO:0002701)	36	4	0.17	+	23.17	3.91e-05	0.000632
cardiac atrium development (GO:0003230)	36	4	0.17	+	23.17	3.91e-05	0.000633
positive regulation of I-kappaB kinase/NF-kappaB signaling (GO:0043123)	186	7	0.89	+	7.85	3.92e-05	0.000633
regulation of animal organ morphogenesis (GO:2000027)	257	8	1.23	+	6.49	4.02e-05	0.000648
cellular response to hormone stimulus (GO:0032870)	613	12	2.94	+	4.08	4.29e-05	0.000691
sensory perception of pain (GO:0019233)	76	5	0.36	+	13.72	4.31e-05	0.000693
regulation of collagen biosynthetic process (GO:0032965)	37	4	0.18	+	22.54	4.32e-05	0.000694
tissue homeostasis (GO:0001894)	189	7	0.91	+	7.72	4.33e-05	0.000695
neural crest cell development (GO:0014032)	77	5	0.37	+	13.54	4.57e-05	0.000733
lymphoid progenitor cell differentiation (GO:0002320)	12	3	0.06	+	52.13	4.6e-05	0.000736
CD4-positive, alpha-beta T cell lineage commitment (GO:0043373)	12	3	0.06	+	52.13	4.6e-05	0.000736
trachea morphogenesis (GO:0060439)	12	3	0.06	+	52.13	4.6e-05	0.000737
regulation of leukocyte tethering or rolling (GO:1903236)	12	3	0.06	+	52.13	4.6e-05	0.000738
negative regulation of alpha-beta T cell activation (GO:0046636)	38	4	0.18	+	21.95	4.76e-05	0.000759
regulation of calcium ion transport (GO:0051924)	264	8	1.27	+	6.32	4.83e-05	0.00077
negative regulation of protein secretion (GO:0050709)	130	6	0.62	+	9.62	4.84e-05	0.000771
regulation of protein localization to membrane (GO:1905475)	193	7	0.93	+	7.56	4.92e-05	0.000783
learning or memory (GO:0007611)	265	8	1.27	+	6.29	4.96e-05	0.000788
negative regulation of lymphocyte proliferation (GO:0050672)	79	5	0.38	+	13.2	5.13e-05	0.000815
response to interleukin-6 (GO:0070741)	39	4	0.19	+	21.39	5.23e-05	0.000828
regulation of oligodendrocyte differentiation (GO:0048713)	39	4	0.19	+	21.39	5.23e-05	0.000828
regulation of actin cytoskeleton reorganization (GO:2000249)	39	4	0.19	+	21.39	5.23e-05	0.000829
cellular response to reactive oxygen species (GO:0034614)	132	6	0.63	+	9.48	5.25e-05	0.000831
macromolecule modification (GO:0043412)	3299	32	15.82	+	2.02	5.29e-05	0.000836
regulation of cardiac muscle tissue development (GO:0055024)	80	5	0.38	+	13.03	5.43e-05	0.000856
negative regulation of mononuclear cell proliferation (GO:0032945)	80	5	0.38	+	13.03	5.43e-05	0.000857
regulation of IRE1-mediated unfolded protein response (GO:1903894)	13	3	0.06	+	48.12	5.65e-05	0.000885
post-embryonic animal morphogenesis (GO:0009886)	13	3	0.06	+	48.12	5.65e-05	0.000886
positive regulation of keratinocyte proliferation (GO:0010838)	13	3	0.06	+	48.12	5.65e-05	0.000886
positive regulation of chemokine biosynthetic process (GO:0045080)	13	3	0.06	+	48.12	5.65e-05	0.000887
negative regulation of interleukin-17 production (GO:0032700)	13	3	0.06	+	48.12	5.65e-05	0.000888
regulation of natural killer cell differentiation (GO:0032823)	13	3	0.06	+	48.12	5.65e-05	0.000889
pathway-restricted SMAD protein phosphorylation (GO:0060389)	13	3	0.06	+	48.12	5.65e-05	0.00089
regulation of striated muscle tissue development (GO:0016202)	134	6	0.64	+	9.34	5.69e-05	0.000891
positive regulation of type I interferon production (GO:0032481)	81	5	0.39	+	12.87	5.74e-05	0.000894
positive regulation of response to endoplasmic reticulum stress (GO:1905898)	40	4	0.19	+	20.85	5.73e-05	0.000895
glial cell migration (GO:0008347)	40	4	0.19	+	20.85	5.73e-05	0.000895
stem cell development (GO:0048864)	81	5	0.39	+	12.87	5.74e-05	0.000895
mesenchymal cell development (GO:0014031)	81	5	0.39	+	12.87	5.74e-05	0.000896
male gonad development (GO:0008584)	135	6	0.65	+	9.27	5.92e-05	0.000921
positive regulation of DNA metabolic process (GO:0051054)	199	7	0.95	+	7.33	5.93e-05	0.000921
response to tumor necrosis factor (GO:0034612)	272	8	1.3	+	6.13	5.92e-05	0.000921
positive regulation of response to biotic stimulus (GO:0002833)	354	9	1.7	+	5.3	6.06e-05	0.00094
chondrocyte differentiation (GO:0002062)	82	5	0.39	+	12.71	6.07e-05	0.000941
response to interleukin-1 (GO:0070555)	200	7	0.96	+	7.3	6.11e-05	0.000946
negative regulation of peptide secretion (GO:0002792)	136	6	0.65	+	9.2	6.16e-05	0.00095
regulation of humoral immune response (GO:0002920)	136	6	0.65	+	9.2	6.16e-05	0.000951
platelet activation (GO:0030168)	136	6	0.65	+	9.2	6.16e-05	0.000952
development of primary male sexual characteristics (GO:0046546)	136	6	0.65	+	9.2	6.16e-05	0.000953
apoptotic cell clearance (GO:0043277)	41	4	0.2	+	20.34	6.26e-05	0.000963
acute-phase response (GO:0006953)	41	4	0.2	+	20.34	6.26e-05	0.000964
ventricular septum morphogenesis (GO:0060412)	41	4	0.2	+	20.34	6.26e-05	0.000965
inner ear development (GO:0048839)	201	7	0.96	+	7.26	6.3e-05	0.000968
regulation of neurotransmitter levels (GO:0001505)	356	9	1.71	+	5.27	6.32e-05	0.00097
regulation of muscle tissue development (GO:1901861)	137	6	0.66	+	9.13	6.41e-05	0.000982
regulation of muscle organ development (GO:0048634)	138	6	0.66	+	9.07	6.66e-05	0.00102
regulation of actin filament organization (GO:0110053)	277	8	1.33	+	6.02	6.7e-05	0.00103
alpha-beta T cell lineage commitment (GO:0002363)	14	3	0.07	+	44.68	6.83e-05	0.00104
response to peptidoglycan (GO:0032494)	14	3	0.07	+	44.68	6.83e-05	0.00104
positive regulation of endoplasmic reticulum unfolded protein response (GO:1900103)	14	3	0.07	+	44.68	6.83e-05	0.00104
regulation of neutrophil migration (GO:1902622)	42	4	0.2	+	19.86	6.84e-05	0.00104
cell fate determination (GO:0001709)	42	4	0.2	+	19.86	6.84e-05	0.00104
positive regulation of B cell proliferation (GO:0030890)	42	4	0.2	+	19.86	6.84e-05	0.00104
regulation of collagen metabolic process (GO:0010712)	42	4	0.2	+	19.86	6.84e-05	0.00104
regulation of membrane permeability (GO:0090559)	85	5	0.41	+	12.27	7.14e-05	0.00108
negative regulation of leukocyte proliferation (GO:0070664)	85	5	0.41	+	12.27	7.14e-05	0.00108
response to estradiol (GO:0032355)	140	6	0.67	+	8.94	7.19e-05	0.00109
positive regulation of transmembrane transport (GO:0034764)	206	7	0.99	+	7.09	7.32e-05	0.00111
negative regulation of cell motility (GO:2000146)	281	8	1.35	+	5.94	7.39e-05	0.00112
negative regulation of inflammatory response (GO:0050728)	141	6	0.68	+	8.87	7.47e-05	0.00113
regulation of protein dephosphorylation (GO:0035304)	141	6	0.68	+	8.87	7.47e-05	0.00113
neural crest cell differentiation (GO:0014033)	86	5	0.41	+	12.12	7.53e-05	0.00114
positive regulation of small molecule metabolic process (GO:0062013)	143	6	0.69	+	8.75	8.05e-05	0.00121
regulation of macrophage cytokine production (GO:0010935)	15	3	0.07	+	41.7	8.17e-05	0.00122
positive regulation of macrophage chemotaxis (GO:0010759)	15	3	0.07	+	41.7	8.17e-05	0.00122
apoptotic process involved in morphogenesis (GO:0060561)	15	3	0.07	+	41.7	8.17e-05	0.00122
regulation of T cell migration (GO:2000404)	44	4	0.21	+	18.96	8.09e-05	0.00122
positive regulation of calcium-mediated signaling (GO:0050850)	44	4	0.21	+	18.96	8.09e-05	0.00122
positive regulation of macrophage differentiation (GO:0045651)	15	3	0.07	+	41.7	8.17e-05	0.00123
positive regulation of interleukin-8 biosynthetic process (GO:0045416)	15	3	0.07	+	41.7	8.17e-05	0.00123
regulation of developmental pigmentation (GO:0048070)	15	3	0.07	+	41.7	8.17e-05	0.00123
phosphate-containing compound metabolic process (GO:0006796)	2142	24	10.27	+	2.34	8.2e-05	0.00123
positive regulation of phosphatidylinositol 3-kinase signaling (GO:0014068)	88	5	0.42	+	11.85	8.35e-05	0.00125
regulation of steroid biosynthetic process (GO:0050810)	88	5	0.42	+	11.85	8.35e-05	0.00125
regulation of translation (GO:0006417)	371	9	1.78	+	5.06	8.6e-05	0.00128
regulation of erythrocyte differentiation (GO:0045646)	45	4	0.22	+	18.53	8.78e-05	0.0013
gonad development (GO:0008406)	212	7	1.02	+	6.88	8.71e-05	0.0013
lung morphogenesis (GO:0060425)	45	4	0.22	+	18.53	8.78e-05	0.00131
regulation of supramolecular fiber organization (GO:1902903)	374	9	1.79	+	5.02	9.13e-05	0.00135
regulation of blood circulation (GO:1903522)	290	8	1.39	+	5.75	9.15e-05	0.00136
regulation of binding (GO:0051098)	374	9	1.79	+	5.02	9.13e-05	0.00136
protein metabolic process (GO:0019538)	4298	38	20.61	+	1.84	9.27e-05	0.00137
positive regulation of cation transmembrane transport (GO:1904064)	147	6	0.71	+	8.51	9.31e-05	0.00138
positive regulation of cellular catabolic process (GO:0031331)	375	9	1.8	+	5	9.31e-05	0.00138
phosphorus metabolic process (GO:0006793)	2169	24	10.4	+	2.31	9.36e-05	0.00138
positive regulation of axon extension (GO:0045773)	46	4	0.22	+	18.13	9.51e-05	0.0014
negative regulation of fat cell differentiation (GO:0045599)	46	4	0.22	+	18.13	9.51e-05	0.0014
regulation of granulocyte chemotaxis (GO:0071622)	46	4	0.22	+	18.13	9.51e-05	0.0014
T cell apoptotic process (GO:0070231)	16	3	0.08	+	39.1	9.67e-05	0.00141
negative regulation of morphogenesis of an epithelium (GO:1905331)	16	3	0.08	+	39.1	9.67e-05	0.00141
CD4-positive or CD8-positive, alpha-beta T cell lineage commitment (GO:0043369)	16	3	0.08	+	39.1	9.67e-05	0.00141
regulation of extracellular matrix disassembly (GO:0010715)	16	3	0.08	+	39.1	9.67e-05	0.00141
blood coagulation (GO:0007596)	292	8	1.4	+	5.71	9.58e-05	0.00141
atrial septum morphogenesis (GO:0060413)	16	3	0.08	+	39.1	9.67e-05	0.00142
positive regulation of SMAD protein signal transduction (GO:0060391)	16	3	0.08	+	39.1	9.67e-05	0.00142
positive regulation of glial cell proliferation (GO:0060252)	16	3	0.08	+	39.1	9.67e-05	0.00142
regulation of MHC class II biosynthetic process (GO:0045346)	16	3	0.08	+	39.1	9.67e-05	0.00142
cellular response to toxic substance (GO:0097237)	216	7	1.04	+	6.76	9.75e-05	0.00142
regulation of catabolic process (GO:0009894)	1005	15	4.82	+	3.11	9.65e-05	0.00142
calcium-mediated signaling (GO:0019722)	149	6	0.71	+	8.4	0.0001	0.00146
coagulation (GO:0050817)	294	8	1.41	+	5.67	0.0001	0.00146
positive regulation of axonogenesis (GO:0050772)	92	5	0.44	+	11.33	0.000102	0.00148
T cell differentiation in thymus (GO:0033077)	47	4	0.23	+	17.75	0.000103	0.00149
bone remodeling (GO:0046849)	47	4	0.23	+	17.75	0.000103	0.00149
development of primary sexual characteristics (GO:0045137)	218	7	1.05	+	6.7	0.000103	0.00149
intrinsic apoptotic signaling pathway (GO:0097193)	150	6	0.72	+	8.34	0.000104	0.0015
hemostasis (GO:0007599)	297	8	1.42	+	5.62	0.000107	0.00155
neural tube closure (GO:0001843)	94	5	0.45	+	11.09	0.000112	0.00162
positive regulation of membrane protein ectodomain proteolysis (GO:0051044)	17	3	0.08	+	36.8	0.000113	0.00163
interleukin-6-mediated signaling pathway (GO:0070102)	17	3	0.08	+	36.8	0.000113	0.00163
positive regulation of glutamate receptor signaling pathway (GO:1900451)	17	3	0.08	+	36.8	0.000113	0.00163
female genitalia development (GO:0030540)	17	3	0.08	+	36.8	0.000113	0.00163
pulmonary valve morphogenesis (GO:0003184)	17	3	0.08	+	36.8	0.000113	0.00163
regulation of tolerance induction (GO:0002643)	17	3	0.08	+	36.8	0.000113	0.00164
regulation of CD8-positive, alpha-beta T cell activation (GO:2001185)	17	3	0.08	+	36.8	0.000113	0.00164
tube closure (GO:0060606)	95	5	0.46	+	10.97	0.000118	0.00169
regulation of endothelial cell apoptotic process (GO:2000351)	49	4	0.24	+	17.02	0.00012	0.00171
negative regulation of leukocyte apoptotic process (GO:2000107)	49	4	0.24	+	17.02	0.00012	0.00171
regulation of cardiocyte differentiation (GO:1905207)	49	4	0.24	+	17.02	0.00012	0.00171
actin polymerization or depolymerization (GO:0008154)	49	4	0.24	+	17.02	0.00012	0.00171
regulation of cellular component size (GO:0032535)	388	9	1.86	+	4.84	0.00012	0.00171
regulation of cell junction assembly (GO:1901888)	96	5	0.46	+	10.86	0.000123	0.00176
connective tissue development (GO:0061448)	225	7	1.08	+	6.49	0.000125	0.00177
regulation of symbiosis, encompassing mutualism through parasitism (GO:0043903)	225	7	1.08	+	6.49	0.000125	0.00178
positive regulation of cytoskeleton organization (GO:0051495)	225	7	1.08	+	6.49	0.000125	0.00178
stem cell differentiation (GO:0048863)	156	6	0.75	+	8.02	0.000128	0.00181
glial cell proliferation (GO:0014009)	18	3	0.09	+	34.75	0.000132	0.00187
negative regulation of interleukin-10 production (GO:0032693)	18	3	0.09	+	34.75	0.000132	0.00187
regulation of microglial cell activation (GO:1903978)	18	3	0.09	+	34.75	0.000132	0.00187
positive regulation of inflammatory response to wounding (GO:0106016)	2	2	0.01	+	> 100	0.000134	0.00189
negative regulation of RNA polymerase II transcriptional preinitiation complex assembly (GO:0017055)	2	2	0.01	+	> 100	0.000134	0.00189
positive regulation of metalloendopeptidase activity (GO:1904685)	2	2	0.01	+	> 100	0.000134	0.00189
positive regulation of matrix metallopeptidase secretion (GO:1904466)	2	2	0.01	+	> 100	0.000134	0.00189
regulation of stress-activated MAPK cascade (GO:0032872)	228	7	1.09	+	6.4	0.000135	0.00189
positive regulation of skeletal muscle satellite cell proliferation (GO:1902724)	2	2	0.01	+	> 100	0.000134	0.0019
B cell negative selection (GO:0002352)	2	2	0.01	+	> 100	0.000134	0.0019
regulation of astrocyte chemotaxis (GO:2000458)	2	2	0.01	+	> 100	0.000134	0.0019
response to ultrasound (GO:1990478)	2	2	0.01	+	> 100	0.000134	0.0019
regulation of immune complex clearance by monocytes and macrophages (GO:0090264)	2	2	0.01	+	> 100	0.000134	0.0019
positive regulation of inhibitory synapse assembly (GO:1905704)	2	2	0.01	+	> 100	0.000134	0.0019
regulation of calcium-mediated signaling (GO:0050848)	98	5	0.47	+	10.64	0.000135	0.0019
positive regulation of growth factor dependent skeletal muscle satellite cell proliferation (GO:1902728)	2	2	0.01	+	> 100	0.000134	0.00191
male sex differentiation (GO:0046661)	158	6	0.76	+	7.92	0.000136	0.00191
morphogenesis of a branching epithelium (GO:0061138)	158	6	0.76	+	7.92	0.000136	0.00191
positive chemotaxis (GO:0050918)	51	4	0.24	+	16.35	0.000138	0.00193
regulation of bone remodeling (GO:0046850)	51	4	0.24	+	16.35	0.000138	0.00193
negative regulation of myeloid leukocyte differentiation (GO:0002762)	51	4	0.24	+	16.35	0.000138	0.00193
positive regulation of ion transmembrane transport (GO:0034767)	159	6	0.76	+	7.87	0.000141	0.00197
regulation of stress-activated protein kinase signaling cascade (GO:0070302)	231	7	1.11	+	6.32	0.000146	0.00203
neural crest cell migration (GO:0001755)	52	4	0.25	+	16.04	0.000148	0.00206
response to ischemia (GO:0002931)	52	4	0.25	+	16.04	0.000148	0.00206
transcription by RNA polymerase II (GO:0006366)	494	10	2.37	+	4.22	0.000148	0.00207
positive regulation of cellular amide metabolic process (GO:0034250)	161	6	0.77	+	7.77	0.000151	0.00209
regulation of interleukin-8 biosynthetic process (GO:0045414)	19	3	0.09	+	32.92	0.000152	0.00211
interferon-gamma production (GO:0032609)	19	3	0.09	+	32.92	0.000152	0.00211
positive regulation of T-helper 1 type immune response (GO:0002827)	19	3	0.09	+	32.92	0.000152	0.00211
cardiac right ventricle morphogenesis (GO:0003215)	19	3	0.09	+	32.92	0.000152	0.00211
primary neural tube formation (GO:0014020)	101	5	0.48	+	10.32	0.000155	0.00214
positive regulation of T cell mediated immunity (GO:0002711)	53	4	0.25	+	15.74	0.000159	0.0022
response to insulin (GO:0032868)	235	7	1.13	+	6.21	0.000162	0.00223
positive regulation of stress-activated MAPK cascade (GO:0032874)	164	6	0.79	+	7.63	0.000166	0.00229
skeletal system development (GO:0001501)	502	10	2.41	+	4.15	0.000168	0.00232
positive regulation of cell-matrix adhesion (GO:0001954)	54	4	0.26	+	15.45	0.00017	0.00234
positive regulation of neural precursor cell proliferation (GO:2000179)	54	4	0.26	+	15.45	0.00017	0.00234
positive regulation of alpha-beta T cell proliferation (GO:0046641)	20	3	0.1	+	31.28	0.000174	0.00238
T-helper 1 type immune response (GO:0042088)	20	3	0.1	+	31.28	0.000174	0.00238
positive regulation of superoxide anion generation (GO:0032930)	20	3	0.1	+	31.28	0.000174	0.00239
negative regulation of phagocytosis (GO:0050765)	20	3	0.1	+	31.28	0.000174	0.00239
lymphocyte apoptotic process (GO:0070227)	20	3	0.1	+	31.28	0.000174	0.00239
mRNA transcription by RNA polymerase II (GO:0042789)	20	3	0.1	+	31.28	0.000174	0.00239
leukocyte adhesion to vascular endothelial cell (GO:0061756)	20	3	0.1	+	31.28	0.000174	0.00239
trachea development (GO:0060438)	20	3	0.1	+	31.28	0.000174	0.0024
positive regulation of stress-activated protein kinase signaling cascade (GO:0070304)	166	6	0.8	+	7.54	0.000177	0.00241
regulation of small GTPase mediated signal transduction (GO:0051056)	320	8	1.53	+	5.21	0.000177	0.00241
negative regulation of intracellular signal transduction (GO:1902532)	505	10	2.42	+	4.13	0.000177	0.00241
regulation of B cell mediated immunity (GO:0002712)	55	4	0.26	+	15.16	0.000182	0.00247
regulation of immunoglobulin mediated immune response (GO:0002889)	55	4	0.26	+	15.16	0.000182	0.00248
regulation of cell division (GO:0051302)	167	6	0.8	+	7.49	0.000182	0.00248
Fc receptor signaling pathway (GO:0038093)	240	7	1.15	+	6.08	0.000183	0.00249
sexual reproduction (GO:0019953)	831	13	3.99	+	3.26	0.000187	0.00254
positive regulation of endocytosis (GO:0045807)	106	5	0.51	+	9.84	0.000192	0.00261
regulation of transmembrane receptor protein serine/threonine kinase signaling pathway (GO:0090092)	242	7	1.16	+	6.03	0.000193	0.00261
regulation of I-kappaB kinase/NF-kappaB signaling (GO:0043122)	242	7	1.16	+	6.03	0.000193	0.00261
regulation of myoblast differentiation (GO:0045661)	56	4	0.27	+	14.89	0.000194	0.00262
positive regulation of B cell activation (GO:0050871)	169	6	0.81	+	7.4	0.000194	0.00262
pulmonary valve development (GO:0003177)	21	3	0.1	+	29.79	0.000199	0.00267
positive regulation of cellular extravasation (GO:0002693)	21	3	0.1	+	29.79	0.000199	0.00267
regulation of heart contraction (GO:0008016)	243	7	1.17	+	6.01	0.000197	0.00267
response to hydroperoxide (GO:0033194)	21	3	0.1	+	29.79	0.000199	0.00268
Rac protein signal transduction (GO:0016601)	21	3	0.1	+	29.79	0.000199	0.00268
ameboidal-type cell migration (GO:0001667)	170	6	0.82	+	7.36	0.0002	0.00269
cortical cytoskeleton organization (GO:0030865)	57	4	0.27	+	14.63	0.000207	0.00277
negative regulation of chemotaxis (GO:0050922)	57	4	0.27	+	14.63	0.000207	0.00278
positive regulation of oxidoreductase activity (GO:0051353)	57	4	0.27	+	14.63	0.000207	0.00278
negative regulation of phosphatase activity (GO:0010923)	108	5	0.52	+	9.65	0.000209	0.0028
positive regulation of transmembrane receptor protein serine/threonine kinase signaling pathway (GO:0090100)	109	5	0.52	+	9.56	0.000218	0.00291
response to alcohol (GO:0097305)	247	7	1.18	+	5.91	0.000218	0.00291
cartilage development (GO:0051216)	173	6	0.83	+	7.23	0.000219	0.00293
lung development (GO:0030324)	173	6	0.83	+	7.23	0.000219	0.00293
signal release (GO:0023061)	173	6	0.83	+	7.23	0.000219	0.00293
apoptotic mitochondrial changes (GO:0008637)	58	4	0.28	+	14.38	0.00022	0.00294
positive regulation of dephosphorylation (GO:0035306)	58	4	0.28	+	14.38	0.00022	0.00294
regulation of inhibitory synapse assembly (GO:1905702)	3	2	0.01	+	> 100	0.000223	0.00296
post-embryonic camera-type eye morphogenesis (GO:0048597)	3	2	0.01	+	> 100	0.000223	0.00296
vertebrate eye-specific patterning (GO:0150064)	3	2	0.01	+	> 100	0.000223	0.00296
positive regulation of calcium ion import (GO:0090280)	22	3	0.11	+	28.43	0.000225	0.00296
negative regulation of growth (GO:0045926)	248	7	1.19	+	5.89	0.000223	0.00296
B cell selection (GO:0002339)	3	2	0.01	+	> 100	0.000223	0.00297
apoptotic process involved in embryonic digit morphogenesis (GO:1902263)	3	2	0.01	+	> 100	0.000223	0.00297
regulation of macrophage differentiation (GO:0045649)	22	3	0.11	+	28.43	0.000225	0.00297
T cell lineage commitment (GO:0002360)	22	3	0.11	+	28.43	0.000225	0.00297
myeloid dendritic cell activation (GO:0001773)	22	3	0.11	+	28.43	0.000225	0.00297
positive regulation of natural killer cell activation (GO:0032816)	22	3	0.11	+	28.43	0.000225	0.00297
Ras protein signal transduction (GO:0007265)	248	7	1.19	+	5.89	0.000223	0.00297
positive regulation of innate immune response (GO:0045089)	332	8	1.59	+	5.02	0.000226	0.00297
negative regulation of angiogenesis (GO:0016525)	110	5	0.53	+	9.48	0.000227	0.00298
cerebellum development (GO:0021549)	110	5	0.53	+	9.48	0.000227	0.00299
regulation of oxidoreductase activity (GO:0051341)	110	5	0.53	+	9.48	0.000227	0.00299
response to fungus (GO:0009620)	59	4	0.28	+	14.14	0.000234	0.00308
regulation of osteoblast differentiation (GO:0045667)	112	5	0.54	+	9.31	0.000246	0.00323
respiratory tube development (GO:0030323)	177	6	0.85	+	7.07	0.000247	0.00324
anatomical structure homeostasis (GO:0060249)	337	8	1.62	+	4.95	0.000249	0.00326
positive regulation of oligodendrocyte differentiation (GO:0048714)	23	3	0.11	+	27.2	0.000253	0.0033
atrial septum development (GO:0003283)	23	3	0.11	+	27.2	0.000253	0.0033
positive regulation of gene silencing by miRNA (GO:2000637)	23	3	0.11	+	27.2	0.000253	0.00331
regulation of superoxide anion generation (GO:0032928)	23	3	0.11	+	27.2	0.000253	0.00331
lens morphogenesis in camera-type eye (GO:0002089)	23	3	0.11	+	27.2	0.000253	0.00331
response to carbohydrate (GO:0009743)	178	6	0.85	+	7.03	0.000255	0.00331
second-messenger-mediated signaling (GO:0019932)	338	8	1.62	+	4.94	0.000254	0.00331
regulation of bicellular tight junction assembly (GO:2000810)	23	3	0.11	+	27.2	0.000253	0.00332
negative regulation of blood vessel morphogenesis (GO:2000181)	113	5	0.54	+	9.23	0.000256	0.00333
response to nutrient levels (GO:0031667)	530	10	2.54	+	3.93	0.000258	0.00336
regulation of signaling receptor activity (GO:0010469)	179	6	0.86	+	6.99	0.000262	0.0034
peptide hormone secretion (GO:0030072)	61	4	0.29	+	13.67	0.000265	0.00342
regulation of epidermal cell differentiation (GO:0045604)	61	4	0.29	+	13.67	0.000265	0.00343
SMAD protein signal transduction (GO:0060395)	61	4	0.29	+	13.67	0.000265	0.00343
positive regulation of wound healing (GO:0090303)	61	4	0.29	+	13.67	0.000265	0.00343
pallium development (GO:0021543)	180	6	0.86	+	6.95	0.00027	0.00349
extracellular matrix organization (GO:0030198)	342	8	1.64	+	4.88	0.000274	0.00354
cellular process involved in reproduction in multicellular organism (GO:0022412)	342	8	1.64	+	4.88	0.000274	0.00354
negative regulation of dephosphorylation (GO:0035305)	115	5	0.55	+	9.07	0.000277	0.00357
extracellular structure organization (GO:0043062)	343	8	1.65	+	4.86	0.00028	0.0036
artery morphogenesis (GO:0048844)	62	4	0.3	+	13.45	0.000281	0.00361
positive regulation of posttranscriptional gene silencing (GO:0060148)	24	3	0.12	+	26.06	0.000284	0.00365
cell surface receptor signaling pathway involved in heart development (GO:0061311)	24	3	0.12	+	26.06	0.000284	0.00365
atrioventricular valve morphogenesis (GO:0003181)	24	3	0.12	+	26.06	0.000284	0.00365
modification of morphology or physiology of other organism (GO:0035821)	182	6	0.87	+	6.87	0.000286	0.00366
negative regulation of protein transport (GO:0051224)	182	6	0.87	+	6.87	0.000286	0.00367
developmental growth involved in morphogenesis (GO:0060560)	116	5	0.56	+	8.99	0.000287	0.00368
forebrain cell migration (GO:0021885)	63	4	0.3	+	13.24	0.000297	0.00381
regulation of stem cell differentiation (GO:2000736)	117	5	0.56	+	8.91	0.000299	0.00382
regulation of cation transmembrane transport (GO:1904062)	347	8	1.66	+	4.81	0.000302	0.00386
regulation of small molecule metabolic process (GO:0062012)	441	9	2.12	+	4.26	0.000304	0.00388
regulation of steroid metabolic process (GO:0019218)	118	5	0.57	+	8.84	0.00031	0.00396
negative regulation of cytokine production involved in immune response (GO:0002719)	25	3	0.12	+	25.02	0.000317	0.00403
regulation of heterotypic cell-cell adhesion (GO:0034114)	25	3	0.12	+	25.02	0.000317	0.00404
lens fiber cell differentiation (GO:0070306)	25	3	0.12	+	25.02	0.000317	0.00404
regulation of membrane protein ectodomain proteolysis (GO:0051043)	25	3	0.12	+	25.02	0.000317	0.00404
organonitrogen compound metabolic process (GO:1901564)	5307	42	25.45	+	1.65	0.000318	0.00404
response to ammonium ion (GO:0060359)	186	6	0.89	+	6.73	0.00032	0.00406
negative regulation of establishment of protein localization (GO:1904950)	186	6	0.89	+	6.73	0.00032	0.00406
metencephalon development (GO:0022037)	119	5	0.57	+	8.76	0.000322	0.00408
cellular response to antibiotic (GO:0071236)	119	5	0.57	+	8.76	0.000322	0.00408
regulation of phosphoprotein phosphatase activity (GO:0043666)	119	5	0.57	+	8.76	0.000322	0.00408
positive regulation of catabolic process (GO:0009896)	445	9	2.13	+	4.22	0.000324	0.0041
endocardial cushion fusion (GO:0003274)	4	2	0.02	+	> 100	0.000334	0.00415
negative regulation of mesonephros development (GO:0061218)	4	2	0.02	+	> 100	0.000334	0.00416
regulation of type II hypersensitivity (GO:0002892)	4	2	0.02	+	> 100	0.000334	0.00416
positive regulation of skeletal muscle cell proliferation (GO:0014858)	4	2	0.02	+	> 100	0.000334	0.00416
positive regulation of complement activation (GO:0045917)	4	2	0.02	+	> 100	0.000334	0.00416
regulation of cell size (GO:0008361)	187	6	0.9	+	6.69	0.000329	0.00416
regulation of matrix metallopeptidase secretion (GO:1904464)	4	2	0.02	+	> 100	0.000334	0.00417
complement-mediated synapse pruning (GO:0150062)	4	2	0.02	+	> 100	0.000334	0.00417
activation of cysteine-type endopeptidase activity involved in apoptotic signaling pathway (GO:0097296)	4	2	0.02	+	> 100	0.000334	0.00417
T-helper 1 cell activation (GO:0035711)	4	2	0.02	+	> 100	0.000334	0.00418
maintenance of permeability of blood-brain barrier (GO:0035633)	4	2	0.02	+	> 100	0.000334	0.00418
sequestering of triglyceride (GO:0030730)	4	2	0.02	+	> 100	0.000334	0.00418
negative regulation of cell migration (GO:0030336)	266	7	1.28	+	5.49	0.000337	0.00418
apoptotic process involved in blood vessel morphogenesis (GO:1902262)	4	2	0.02	+	> 100	0.000334	0.00419
regulation of inflammatory response to wounding (GO:0106014)	4	2	0.02	+	> 100	0.000334	0.00419
ascending aorta morphogenesis (GO:0035910)	4	2	0.02	+	> 100	0.000334	0.00419
regulation of Ras protein signal transduction (GO:0046578)	188	6	0.9	+	6.65	0.000338	0.00419
chemokine (C-X-C motif) ligand 12 signaling pathway (GO:0038146)	4	2	0.02	+	> 100	0.000334	0.0042
macrophage colony-stimulating factor signaling pathway (GO:0038145)	4	2	0.02	+	> 100	0.000334	0.0042
osteoclast proliferation (GO:0002158)	4	2	0.02	+	> 100	0.000334	0.0042
positive regulation of smooth muscle cell chemotaxis (GO:0071673)	4	2	0.02	+	> 100	0.000334	0.00421
microglial cell activation involved in immune response (GO:0002282)	4	2	0.02	+	> 100	0.000334	0.00421
regulation of type IIa hypersensitivity (GO:0001796)	4	2	0.02	+	> 100	0.000334	0.00421
vitellogenesis (GO:0007296)	4	2	0.02	+	> 100	0.000334	0.00422
pattern recognition receptor signaling pathway (GO:0002221)	120	5	0.58	+	8.69	0.000334	0.00422
organelle organization (GO:0006996)	3428	31	16.44	+	1.89	0.000346	0.00429
atrioventricular valve development (GO:0003171)	26	3	0.12	+	24.06	0.000352	0.00432
regulation of inflammatory response to antigenic stimulus (GO:0002861)	26	3	0.12	+	24.06	0.000352	0.00433
regulation of T-helper 1 type immune response (GO:0002825)	26	3	0.12	+	24.06	0.000352	0.00433
positive regulation of alcohol biosynthetic process (GO:1902932)	26	3	0.12	+	24.06	0.000352	0.00433
regulation of lymphocyte chemotaxis (GO:1901623)	26	3	0.12	+	24.06	0.000352	0.00434
response to cholesterol (GO:0070723)	26	3	0.12	+	24.06	0.000352	0.00434
positive regulation of neutrophil chemotaxis (GO:0090023)	26	3	0.12	+	24.06	0.000352	0.00434
positive regulation of collagen biosynthetic process (GO:0032967)	26	3	0.12	+	24.06	0.000352	0.00435
pharyngeal system development (GO:0060037)	26	3	0.12	+	24.06	0.000352	0.00435
regulation of interleukin-8 secretion (GO:2000482)	26	3	0.12	+	24.06	0.000352	0.00435
regulation of SMAD protein signal transduction (GO:0060390)	26	3	0.12	+	24.06	0.000352	0.00436
positive regulation of transcription regulatory region DNA binding (GO:2000679)	26	3	0.12	+	24.06	0.000352	0.00436
regulation of immunoglobulin production (GO:0002637)	66	4	0.32	+	12.64	0.000352	0.00436
regulation of actin polymerization or depolymerization (GO:0008064)	190	6	0.91	+	6.58	0.000357	0.00438
regulation of actin filament length (GO:0030832)	191	6	0.92	+	6.55	0.000367	0.00449
cellular response to peptide hormone stimulus (GO:0071375)	270	7	1.29	+	5.41	0.000368	0.0045
negative regulation of cytokine secretion (GO:0050710)	67	4	0.32	+	12.45	0.000372	0.00455
regulation of axonogenesis (GO:0050770)	192	6	0.92	+	6.52	0.000377	0.00461
regulation of DNA metabolic process (GO:0051052)	360	8	1.73	+	4.63	0.000383	0.00468
neuron migration (GO:0001764)	124	5	0.59	+	8.41	0.000386	0.00471
regulation of macrophage chemotaxis (GO:0010758)	27	3	0.13	+	23.17	0.00039	0.00475
positive regulation of collagen metabolic process (GO:0010714)	27	3	0.13	+	23.17	0.00039	0.00475
outflow tract septum morphogenesis (GO:0003148)	27	3	0.13	+	23.17	0.00039	0.00475
mRNA transcription (GO:0009299)	27	3	0.13	+	23.17	0.00039	0.00476
positive regulation of protein localization to membrane (GO:1905477)	125	5	0.6	+	8.34	0.0004	0.00487
negative regulation of hydrolase activity (GO:0051346)	459	9	2.2	+	4.09	0.000404	0.00491
nitrogen compound metabolic process (GO:0006807)	7000	51	33.57	+	1.52	0.000405	0.00492
positive regulation of striated muscle tissue development (GO:0045844)	69	4	0.33	+	12.09	0.000413	0.005
regulation of toll-like receptor signaling pathway (GO:0034121)	69	4	0.33	+	12.09	0.000413	0.00501
positive regulation of muscle organ development (GO:0048636)	69	4	0.33	+	12.09	0.000413	0.00501
programmed necrotic cell death (GO:0097300)	28	3	0.13	+	22.34	0.00043	0.00518
aortic valve morphogenesis (GO:0003180)	28	3	0.13	+	22.34	0.00043	0.00518
positive regulation of granulocyte chemotaxis (GO:0071624)	28	3	0.13	+	22.34	0.00043	0.00519
positive regulation of cardiocyte differentiation (GO:1905209)	28	3	0.13	+	22.34	0.00043	0.00519
regulation of endoplasmic reticulum unfolded protein response (GO:1900101)	28	3	0.13	+	22.34	0.00043	0.00519
positive regulation of calcium ion transport (GO:0051928)	127	5	0.61	+	8.21	0.000429	0.00519
embryonic limb morphogenesis (GO:0030326)	127	5	0.61	+	8.21	0.000429	0.00519
embryonic appendage morphogenesis (GO:0035113)	127	5	0.61	+	8.21	0.000429	0.00519
apoptotic process involved in development (GO:1902742)	28	3	0.13	+	22.34	0.00043	0.0052
positive regulation of muscle tissue development (GO:1901863)	70	4	0.34	+	11.91	0.000435	0.00523
digestive tract development (GO:0048565)	128	5	0.61	+	8.14	0.000444	0.00533
platelet degranulation (GO:0002576)	128	5	0.61	+	8.14	0.000444	0.00534
respiratory system development (GO:0060541)	199	6	0.95	+	6.29	0.000453	0.00543
vasculogenesis (GO:0001570)	71	4	0.34	+	11.75	0.000458	0.00549
regulation of type I interferon production (GO:0032479)	129	5	0.62	+	8.08	0.00046	0.0055
regulation of DNA binding (GO:0051101)	129	5	0.62	+	8.08	0.00046	0.0055
kidney epithelium development (GO:0072073)	129	5	0.62	+	8.08	0.00046	0.00551
negative regulation of transcription initiation from RNA polymerase II promoter (GO:0060633)	5	2	0.02	+	83.4	0.000466	0.00553
negative regulation of macrophage cytokine production (GO:0010936)	5	2	0.02	+	83.4	0.000466	0.00554
cell adhesion involved in heart morphogenesis (GO:0061343)	5	2	0.02	+	83.4	0.000466	0.00554
atrial septum primum morphogenesis (GO:0003289)	5	2	0.02	+	83.4	0.000466	0.00554
negative regulation of myosin-light-chain-phosphatase activity (GO:0035509)	5	2	0.02	+	83.4	0.000466	0.00555
positive regulation of epithelial to mesenchymal transition involved in endocardial cushion formation (GO:1905007)	5	2	0.02	+	83.4	0.000466	0.00555
nephric duct formation (GO:0072179)	5	2	0.02	+	83.4	0.000466	0.00556
negative regulation of cell proliferation involved in kidney development (GO:1901723)	5	2	0.02	+	83.4	0.000466	0.00556
ascending aorta development (GO:0035905)	5	2	0.02	+	83.4	0.000466	0.00556
negative regulation of neutrophil activation (GO:1902564)	5	2	0.02	+	83.4	0.000466	0.00557
positive regulation of apoptotic DNA fragmentation (GO:1902512)	5	2	0.02	+	83.4	0.000466	0.00557
actin filament polymerization (GO:0030041)	29	3	0.14	+	21.57	0.000473	0.00558
positive regulation of CD4-positive, alpha-beta T cell differentiation (GO:0043372)	29	3	0.14	+	21.57	0.000473	0.00559
regulation of ruffle assembly (GO:1900027)	29	3	0.14	+	21.57	0.000473	0.00559
regulation of regulatory T cell differentiation (GO:0045589)	29	3	0.14	+	21.57	0.000473	0.0056
positive regulation of release of cytochrome c from mitochondria (GO:0090200)	29	3	0.14	+	21.57	0.000473	0.0056
negative regulation of osteoclast differentiation (GO:0045671)	29	3	0.14	+	21.57	0.000473	0.00561
positive regulation of erythrocyte differentiation (GO:0045648)	29	3	0.14	+	21.57	0.000473	0.00561
branching morphogenesis of an epithelial tube (GO:0048754)	130	5	0.62	+	8.02	0.000476	0.00561
positive regulation of supramolecular fiber organization (GO:1902905)	202	6	0.97	+	6.19	0.000489	0.00576
mitochondrial membrane organization (GO:0007006)	131	5	0.63	+	7.96	0.000492	0.00579
I-kappaB kinase/NF-kappaB signaling (GO:0007249)	73	4	0.35	+	11.43	0.000506	0.00596
regulation of myeloid cell apoptotic process (GO:0033032)	30	3	0.14	+	20.85	0.000519	0.00609
necrotic cell death (GO:0070265)	30	3	0.14	+	20.85	0.000519	0.00609
response to sterol (GO:0036314)	30	3	0.14	+	20.85	0.000519	0.00609
salivary gland morphogenesis (GO:0007435)	30	3	0.14	+	20.85	0.000519	0.0061
gamete generation (GO:0007276)	691	11	3.31	+	3.32	0.000523	0.00613
positive regulation of blood circulation (GO:1903524)	74	4	0.35	+	11.27	0.000532	0.00622
regulation of glucose transmembrane transport (GO:0010827)	74	4	0.35	+	11.27	0.000532	0.00623
cellular response to extracellular stimulus (GO:0031668)	288	7	1.38	+	5.07	0.000535	0.00626
positive regulation of translation (GO:0045727)	134	5	0.64	+	7.78	0.000543	0.00635
in utero embryonic development (GO:0001701)	382	8	1.83	+	4.37	0.000563	0.00657
dendritic cell differentiation (GO:0097028)	31	3	0.15	+	20.18	0.000567	0.0066
regulation of alpha-beta T cell proliferation (GO:0046640)	31	3	0.15	+	20.18	0.000567	0.00661
mammary gland duct morphogenesis (GO:0060603)	31	3	0.15	+	20.18	0.000567	0.00661
regulation of axon extension involved in axon guidance (GO:0048841)	31	3	0.15	+	20.18	0.000567	0.00662
positive regulation of JNK cascade (GO:0046330)	136	5	0.65	+	7.67	0.00058	0.00675
regulation of alcohol biosynthetic process (GO:1902930)	76	4	0.36	+	10.97	0.000585	0.00679
skin epidermis development (GO:0098773)	76	4	0.36	+	10.97	0.000585	0.0068
negative regulation of ossification (GO:0030279)	76	4	0.36	+	10.97	0.000585	0.0068
regulation of viral process (GO:0050792)	210	6	1.01	+	5.96	0.000597	0.00692
T-helper 17 cell lineage commitment (GO:0072540)	6	2	0.03	+	69.5	0.00062	0.00707
septum primum development (GO:0003284)	6	2	0.03	+	69.5	0.00062	0.00708
regulation of branching involved in lung morphogenesis (GO:0061046)	6	2	0.03	+	69.5	0.00062	0.00708
behavior (GO:0007610)	594	10	2.85	+	3.51	0.000621	0.00708
regulation of chemokine (C-C motif) ligand 2 secretion (GO:1904207)	6	2	0.03	+	69.5	0.00062	0.00709
positive regulation of DNA catabolic process (GO:1903626)	6	2	0.03	+	69.5	0.00062	0.00709
regulation of epithelial to mesenchymal transition involved in endocardial cushion formation (GO:1905005)	6	2	0.03	+	69.5	0.00062	0.0071
positive regulation of chemokine (C-C motif) ligand 2 secretion (GO:1904209)	6	2	0.03	+	69.5	0.00062	0.0071
positive regulation of prostaglandin biosynthetic process (GO:0031394)	6	2	0.03	+	69.5	0.00062	0.00711
regulation of metalloendopeptidase activity (GO:1904683)	6	2	0.03	+	69.5	0.00062	0.00711
astrocyte cell migration (GO:0043615)	6	2	0.03	+	69.5	0.00062	0.00712
regulation of NK T cell differentiation (GO:0051136)	6	2	0.03	+	69.5	0.00062	0.00712
regulation of ion transmembrane transport (GO:0034765)	487	9	2.34	+	3.85	0.000614	0.00712
proximal tubule development (GO:0072014)	6	2	0.03	+	69.5	0.00062	0.00713
negative regulation of DNA-templated transcription, initiation (GO:2000143)	6	2	0.03	+	69.5	0.00062	0.00713
aortic valve development (GO:0003176)	32	3	0.15	+	19.55	0.000618	0.00713
muscle system process (GO:0003012)	295	7	1.41	+	4.95	0.000615	0.00713
glomerular capillary formation (GO:0072104)	6	2	0.03	+	69.5	0.00062	0.00714
glomerulus vasculature morphogenesis (GO:0072103)	6	2	0.03	+	69.5	0.00062	0.00714
ERBB2 signaling pathway (GO:0038128)	32	3	0.15	+	19.55	0.000618	0.00714
regulation of neutrophil chemotaxis (GO:0090022)	32	3	0.15	+	19.55	0.000618	0.00714
positive regulation of T cell tolerance induction (GO:0002666)	6	2	0.03	+	69.5	0.00062	0.00715
regulation of glial cell proliferation (GO:0060251)	32	3	0.15	+	19.55	0.000618	0.00715
antigen receptor-mediated signaling pathway (GO:0050851)	296	7	1.42	+	4.93	0.000627	0.00715
positive regulation of neutrophil migration (GO:1902624)	32	3	0.15	+	19.55	0.000618	0.00716
stem cell population maintenance (GO:0019827)	139	5	0.67	+	7.5	0.000638	0.00726
positive regulation of cell cycle (GO:0045787)	391	8	1.88	+	4.27	0.000653	0.00743
negative regulation of defense response (GO:0031348)	214	6	1.03	+	5.85	0.000657	0.00747
digestive system development (GO:0055123)	140	5	0.67	+	7.45	0.000658	0.00748
blood circulation (GO:0008015)	392	8	1.88	+	4.26	0.000664	0.00754
salivary gland development (GO:0007431)	33	3	0.16	+	18.96	0.000672	0.00762
detection of mechanical stimulus involved in sensory perception (GO:0050974)	33	3	0.16	+	18.96	0.000672	0.00762
nephron tubule development (GO:0072080)	79	4	0.38	+	10.56	0.000673	0.00762
interaction with symbiont (GO:0051702)	79	4	0.38	+	10.56	0.000673	0.00762
response to glucose (GO:0009749)	141	5	0.68	+	7.39	0.000679	0.00768
antimicrobial humoral response (GO:0019730)	142	5	0.68	+	7.34	0.0007	0.00791
maintenance of cell number (GO:0098727)	142	5	0.68	+	7.34	0.0007	0.00792
response to anesthetic (GO:0072347)	80	4	0.38	+	10.43	0.000704	0.00794
cell junction organization (GO:0034330)	218	6	1.05	+	5.74	0.000722	0.00814
positive regulation of cartilage development (GO:0061036)	34	3	0.16	+	18.4	0.000729	0.00818
negative regulation of blood circulation (GO:1903523)	34	3	0.16	+	18.4	0.000729	0.00819
negative regulation of exocytosis (GO:0045920)	34	3	0.16	+	18.4	0.000729	0.00819
positive regulation of interleukin-1 beta secretion (GO:0050718)	34	3	0.16	+	18.4	0.000729	0.0082
positive regulation of phosphatase activity (GO:0010922)	34	3	0.16	+	18.4	0.000729	0.0082
regulation of endothelial cell differentiation (GO:0045601)	34	3	0.16	+	18.4	0.000729	0.00821
positive regulation of peptidyl-lysine acetylation (GO:2000758)	34	3	0.16	+	18.4	0.000729	0.00821
nerve development (GO:0021675)	81	4	0.39	+	10.3	0.000736	0.00825
regulation of cold-induced thermogenesis (GO:0120161)	144	5	0.69	+	7.24	0.000744	0.00835
regulation of cellular catabolic process (GO:0031329)	842	12	4.04	+	2.97	0.00076	0.00851
circulatory system process (GO:0003013)	401	8	1.92	+	4.16	0.000767	0.00859
regulation of iron ion transport (GO:0034756)	7	2	0.03	+	59.57	0.000794	0.00875
interleukin-4 secretion (GO:0072602)	7	2	0.03	+	59.57	0.000794	0.00875
macrophage proliferation (GO:0061517)	7	2	0.03	+	59.57	0.000794	0.00876
ectopic germ cell programmed cell death (GO:0035234)	7	2	0.03	+	59.57	0.000794	0.00876
microglial cell proliferation (GO:0061518)	7	2	0.03	+	59.57	0.000794	0.00877
regulation of myosin-light-chain-phosphatase activity (GO:0035507)	7	2	0.03	+	59.57	0.000794	0.00878
activation of cysteine-type endopeptidase activity involved in apoptotic process by cytochrome c (GO:0008635)	7	2	0.03	+	59.57	0.000794	0.00878
response to isolation stress (GO:0035900)	7	2	0.03	+	59.57	0.000794	0.00879
post-embryonic eye morphogenesis (GO:0048050)	7	2	0.03	+	59.57	0.000794	0.00879
positive regulation of fever generation (GO:0031622)	7	2	0.03	+	59.57	0.000794	0.0088
regulation of interleukin-23 production (GO:0032667)	7	2	0.03	+	59.57	0.000794	0.00881
positive regulation of interleukin-12 biosynthetic process (GO:0045084)	7	2	0.03	+	59.57	0.000794	0.00881
positive regulation of morphogenesis of an epithelium (GO:1905332)	35	3	0.17	+	17.87	0.000788	0.00881
inflammatory response to wounding (GO:0090594)	7	2	0.03	+	59.57	0.000794	0.00882
positive regulation of signaling receptor activity (GO:2000273)	35	3	0.17	+	17.87	0.000788	0.00882
response to hexose (GO:0009746)	146	5	0.7	+	7.14	0.00079	0.00882
positive regulation of T-helper 2 cell cytokine production (GO:2000553)	7	2	0.03	+	59.57	0.000794	0.00883
blood vessel endothelial cell proliferation involved in sprouting angiogenesis (GO:0002043)	7	2	0.03	+	59.57	0.000794	0.00883
renal tubule development (GO:0061326)	83	4	0.4	+	10.05	0.000803	0.00883
positive regulation of synaptic transmission (GO:0050806)	146	5	0.7	+	7.14	0.00079	0.00883
response to nutrient (GO:0007584)	222	6	1.06	+	5.64	0.000791	0.00883
negative regulation of dendritic cell apoptotic process (GO:2000669)	7	2	0.03	+	59.57	0.000794	0.00884
regulation of smooth muscle cell chemotaxis (GO:0071671)	7	2	0.03	+	59.57	0.000794	0.00884
protein insertion into mitochondrial membrane involved in apoptotic signaling pathway (GO:0001844)	7	2	0.03	+	59.57	0.000794	0.00885
ureter morphogenesis (GO:0072197)	7	2	0.03	+	59.57	0.000794	0.00886
innate immune response-activating signal transduction (GO:0002758)	223	6	1.07	+	5.61	0.00081	0.0089
positive regulation of ossification (GO:0045778)	84	4	0.4	+	9.93	0.000838	0.00921
positive regulation of phosphatidylinositol 3-kinase activity (GO:0043552)	36	3	0.17	+	17.38	0.000851	0.00933
regulation of cardiac muscle cell differentiation (GO:2000725)	36	3	0.17	+	17.38	0.000851	0.00934
positive regulation of interleukin-10 production (GO:0032733)	36	3	0.17	+	17.38	0.000851	0.00934
semaphorin-plexin signaling pathway (GO:0071526)	37	3	0.18	+	16.91	0.000917	0.01
animal organ formation (GO:0048645)	37	3	0.18	+	16.91	0.000917	0.01
response to monosaccharide (GO:0034284)	151	5	0.72	+	6.9	0.000915	0.01
positive regulation of cell division (GO:0051781)	87	4	0.42	+	9.59	0.00095	0.0104
artery development (GO:0060840)	87	4	0.42	+	9.59	0.00095	0.0104
kidney vasculature morphogenesis (GO:0061439)	8	2	0.04	+	52.13	0.00099	0.0106
renal system vasculature morphogenesis (GO:0061438)	8	2	0.04	+	52.13	0.00099	0.0106
negative regulation of glial cell apoptotic process (GO:0034351)	8	2	0.04	+	52.13	0.00099	0.0106
T-helper 17 cell differentiation (GO:0072539)	8	2	0.04	+	52.13	0.00099	0.0106
T-helper 17 type immune response (GO:0072538)	8	2	0.04	+	52.13	0.00099	0.0106
negative regulation of apoptotic signaling pathway (GO:2001234)	231	6	1.11	+	5.42	0.000967	0.0106
positive regulation of apoptotic cell clearance (GO:2000427)	8	2	0.04	+	52.13	0.00099	0.0107
tumor necrosis factor production (GO:0032640)	8	2	0.04	+	52.13	0.00099	0.0107
interleukin-4 production (GO:0032633)	8	2	0.04	+	52.13	0.00099	0.0107
regulation of immature T cell proliferation in thymus (GO:0033084)	8	2	0.04	+	52.13	0.00099	0.0107
regulation of neutrophil apoptotic process (GO:0033029)	8	2	0.04	+	52.13	0.00099	0.0107
regulation of DNA demethylation (GO:1901535)	8	2	0.04	+	52.13	0.00099	0.0107
regulation of fever generation (GO:0031620)	8	2	0.04	+	52.13	0.00099	0.0107
positive regulation of granulocyte differentiation (GO:0030854)	8	2	0.04	+	52.13	0.00099	0.0107
negative regulation of amyloid-beta clearance (GO:1900222)	8	2	0.04	+	52.13	0.00099	0.0107
cellular response to macrophage colony-stimulating factor stimulus (GO:0036006)	8	2	0.04	+	52.13	0.00099	0.0107
response to macrophage colony-stimulating factor (GO:0036005)	8	2	0.04	+	52.13	0.00099	0.0107
pharyngeal arch artery morphogenesis (GO:0061626)	8	2	0.04	+	52.13	0.00099	0.0107
pri-miRNA transcription by RNA polymerase II (GO:0061614)	8	2	0.04	+	52.13	0.00099	0.0107
positive regulation of cardiac epithelial to mesenchymal transition (GO:0062043)	8	2	0.04	+	52.13	0.00099	0.0107
postsynaptic signal transduction (GO:0098926)	38	3	0.18	+	16.46	0.000986	0.0107
epidermis development (GO:0008544)	418	8	2	+	3.99	0.000997	0.0107
positive regulation of leukocyte tethering or rolling (GO:1903238)	8	2	0.04	+	52.13	0.00099	0.0108
positive regulation of unsaturated fatty acid biosynthetic process (GO:2001280)	8	2	0.04	+	52.13	0.00099	0.0108
regulation of natural killer cell chemotaxis (GO:2000501)	8	2	0.04	+	52.13	0.00099	0.0108
positive regulation of natural killer cell differentiation (GO:0032825)	8	2	0.04	+	52.13	0.00099	0.0108
regulation of extracellular matrix organization (GO:1903053)	38	3	0.18	+	16.46	0.000986	0.0108
maternal placenta development (GO:0001893)	38	3	0.18	+	16.46	0.000986	0.0108
regulation of neural precursor cell proliferation (GO:2000177)	89	4	0.43	+	9.37	0.00103	0.011
regulation of response to endoplasmic reticulum stress (GO:1905897)	89	4	0.43	+	9.37	0.00103	0.011
positive regulation of epidermis development (GO:0045684)	39	3	0.19	+	16.04	0.00106	0.0113
regulation of NMDA receptor activity (GO:2000310)	39	3	0.19	+	16.04	0.00106	0.0113
positive regulation of interleukin-1 secretion (GO:0050716)	39	3	0.19	+	16.04	0.00106	0.0113
positive regulation of substrate adhesion-dependent cell spreading (GO:1900026)	39	3	0.19	+	16.04	0.00106	0.0113
positive regulation of immunoglobulin mediated immune response (GO:0002891)	39	3	0.19	+	16.04	0.00106	0.0113
positive regulation of B cell mediated immunity (GO:0002714)	39	3	0.19	+	16.04	0.00106	0.0113
actin filament organization (GO:0007015)	235	6	1.13	+	5.32	0.00105	0.0113
small GTPase mediated signal transduction (GO:0007264)	325	7	1.56	+	4.49	0.00107	0.0114
placenta development (GO:0001890)	157	5	0.75	+	6.64	0.00108	0.0115
regulation of G1/S transition of mitotic cell cycle (GO:2000045)	157	5	0.75	+	6.64	0.00108	0.0115
positive regulation of lipid kinase activity (GO:0090218)	40	3	0.19	+	15.64	0.00113	0.012
positive regulation of sprouting angiogenesis (GO:1903672)	40	3	0.19	+	15.64	0.00113	0.012
positive regulation of heart contraction (GO:0045823)	40	3	0.19	+	15.64	0.00113	0.012
receptor-mediated endocytosis (GO:0006898)	239	6	1.15	+	5.23	0.00115	0.0122
defense response to Gram-negative bacterium (GO:0050829)	92	4	0.44	+	9.07	0.00116	0.0123
interferon-gamma secretion (GO:0072643)	9	2	0.04	+	46.34	0.00121	0.0126
interleukin-23-mediated signaling pathway (GO:0038155)	9	2	0.04	+	46.34	0.00121	0.0127
Bergmann glial cell differentiation (GO:0060020)	9	2	0.04	+	46.34	0.00121	0.0127
actin crosslink formation (GO:0051764)	9	2	0.04	+	46.34	0.00121	0.0127
regulation of interleukin-12 biosynthetic process (GO:0045075)	9	2	0.04	+	46.34	0.00121	0.0127
T-helper 1 cell differentiation (GO:0045063)	9	2	0.04	+	46.34	0.00121	0.0127
negative regulation of endoplasmic reticulum calcium ion concentration (GO:0032471)	9	2	0.04	+	46.34	0.00121	0.0127
positive regulation of axon regeneration (GO:0048680)	9	2	0.04	+	46.34	0.00121	0.0127
regulation of prostaglandin biosynthetic process (GO:0031392)	9	2	0.04	+	46.34	0.00121	0.0127
positive regulation of metallopeptidase activity (GO:1905050)	9	2	0.04	+	46.34	0.00121	0.0127
regulation of cardiac epithelial to mesenchymal transition (GO:0062042)	9	2	0.04	+	46.34	0.00121	0.0127
regulation of hypersensitivity (GO:0002883)	9	2	0.04	+	46.34	0.00121	0.0127
positive regulation of tolerance induction (GO:0002645)	9	2	0.04	+	46.34	0.00121	0.0128
integrin activation (GO:0033622)	9	2	0.04	+	46.34	0.00121	0.0128
marginal zone B cell differentiation (GO:0002315)	9	2	0.04	+	46.34	0.00121	0.0128
glomerulus morphogenesis (GO:0072102)	9	2	0.04	+	46.34	0.00121	0.0128
transcription, DNA-templated (GO:0006351)	651	10	3.12	+	3.2	0.00123	0.0129
gastrulation (GO:0007369)	162	5	0.78	+	6.44	0.00124	0.013
nucleic acid-templated transcription (GO:0097659)	652	10	3.13	+	3.2	0.00125	0.013
posttranscriptional regulation of gene expression (GO:0010608)	540	9	2.59	+	3.48	0.00125	0.0131
response to radiation (GO:0009314)	435	8	2.09	+	3.83	0.00128	0.0134
regulation of heart morphogenesis (GO:2000826)	42	3	0.2	+	14.89	0.00129	0.0135
negative regulation of interleukin-6 production (GO:0032715)	42	3	0.2	+	14.89	0.00129	0.0135
regulation of calcium ion import (GO:0090279)	42	3	0.2	+	14.89	0.00129	0.0135
regulation of cell killing (GO:0031341)	96	4	0.46	+	8.69	0.00135	0.0141
muscle contraction (GO:0006936)	247	6	1.18	+	5.07	0.00135	0.0141
endocytosis (GO:0006897)	547	9	2.62	+	3.43	0.00137	0.0142
regulation of axon guidance (GO:1902667)	43	3	0.21	+	14.55	0.00138	0.0143
positive regulation of protein acetylation (GO:1901985)	43	3	0.21	+	14.55	0.00138	0.0143
platelet aggregation (GO:0070527)	43	3	0.21	+	14.55	0.00138	0.0143
activation of innate immune response (GO:0002218)	248	6	1.19	+	5.04	0.00138	0.0144
positive regulation of cold-induced thermogenesis (GO:0120162)	97	4	0.47	+	8.6	0.0014	0.0145
G protein-coupled receptor signaling pathway, coupled to cyclic nucleotide second messenger (GO:0007187)	249	6	1.19	+	5.02	0.00141	0.0146
programmed cell death involved in cell development (GO:0010623)	10	2	0.05	+	41.7	0.00144	0.0148
negative regulation of myeloid leukocyte mediated immunity (GO:0002887)	10	2	0.05	+	41.7	0.00144	0.0148
regulation of glial cell apoptotic process (GO:0034350)	10	2	0.05	+	41.7	0.00144	0.0148
RNA biosynthetic process (GO:0032774)	664	10	3.18	+	3.14	0.00142	0.0148
regulation of T cell tolerance induction (GO:0002664)	10	2	0.05	+	41.7	0.00144	0.0149
bronchus development (GO:0060433)	10	2	0.05	+	41.7	0.00144	0.0149
tumor necrosis factor superfamily cytokine production (GO:0071706)	10	2	0.05	+	41.7	0.00144	0.0149
regulation of dendritic cell apoptotic process (GO:2000668)	10	2	0.05	+	41.7	0.00144	0.0149
T-helper cell lineage commitment (GO:0002295)	10	2	0.05	+	41.7	0.00144	0.0149
cytoplasm organization (GO:0007028)	10	2	0.05	+	41.7	0.00144	0.0149
regulation of immature T cell proliferation (GO:0033083)	10	2	0.05	+	41.7	0.00144	0.0149
positive regulation of neuron projection regeneration (GO:0070572)	10	2	0.05	+	41.7	0.00144	0.0149
positive regulation of production of miRNAs involved in gene silencing by miRNA (GO:1903800)	10	2	0.05	+	41.7	0.00144	0.0149
germ cell development (GO:0007281)	250	6	1.2	+	5	0.00144	0.0149
exocrine system development (GO:0035272)	44	3	0.21	+	14.22	0.00147	0.015
regulation of neuron migration (GO:2001222)	44	3	0.21	+	14.22	0.00147	0.0151
regulation of bone resorption (GO:0045124)	44	3	0.21	+	14.22	0.00147	0.0151
positive regulation of cardiac muscle tissue development (GO:0055025)	44	3	0.21	+	14.22	0.00147	0.0151
positive regulation of protein dephosphorylation (GO:0035307)	44	3	0.21	+	14.22	0.00147	0.0151
vascular process in circulatory system (GO:0003018)	169	5	0.81	+	6.17	0.00149	0.0152
import into cell (GO:0098657)	668	10	3.2	+	3.12	0.00149	0.0152
toll-like receptor signaling pathway (GO:0002224)	99	4	0.47	+	8.42	0.0015	0.0154
nephron epithelium development (GO:0072009)	99	4	0.47	+	8.42	0.0015	0.0154
autonomic nervous system development (GO:0048483)	45	3	0.22	+	13.9	0.00156	0.0159
endocardial cushion development (GO:0003197)	45	3	0.22	+	13.9	0.00156	0.0159
maintenance of location (GO:0051235)	173	5	0.83	+	6.03	0.00164	0.0168
regulation of nitric-oxide synthase activity (GO:0050999)	46	3	0.22	+	13.6	0.00166	0.0169
interleukin-35-mediated signaling pathway (GO:0070757)	11	2	0.05	+	37.91	0.0017	0.0172
detection of molecule of bacterial origin (GO:0032490)	11	2	0.05	+	37.91	0.0017	0.0172
negative regulation of skeletal muscle tissue development (GO:0048642)	11	2	0.05	+	37.91	0.0017	0.0172
synapse pruning (GO:0098883)	11	2	0.05	+	37.91	0.0017	0.0172
positive regulation of heat generation (GO:0031652)	11	2	0.05	+	37.91	0.0017	0.0172
interleukin-27-mediated signaling pathway (GO:0070106)	11	2	0.05	+	37.91	0.0017	0.0172
regulation of unsaturated fatty acid biosynthetic process (GO:2001279)	11	2	0.05	+	37.91	0.0017	0.0173
positive regulation of cysteine-type endopeptidase activity involved in apoptotic signaling pathway (GO:2001269)	11	2	0.05	+	37.91	0.0017	0.0173
regulation of neutrophil activation (GO:1902563)	11	2	0.05	+	37.91	0.0017	0.0173
natural killer cell differentiation (GO:0001779)	11	2	0.05	+	37.91	0.0017	0.0173
regulation of T-helper 2 cell cytokine production (GO:2000551)	11	2	0.05	+	37.91	0.0017	0.0173
glomerular visceral epithelial cell development (GO:0072015)	11	2	0.05	+	37.91	0.0017	0.0173
regulation of plasma membrane bounded cell projection assembly (GO:0120032)	175	5	0.84	+	5.96	0.00173	0.0174
columnar/cuboidal epithelial cell differentiation (GO:0002065)	103	4	0.49	+	8.1	0.00173	0.0175
antimicrobial humoral immune response mediated by antimicrobial peptide (GO:0061844)	103	4	0.49	+	8.1	0.00173	0.0175
regulation of interleukin-1 beta secretion (GO:0050706)	47	3	0.23	+	13.31	0.00176	0.0177
regulation of lipid storage (GO:0010883)	47	3	0.23	+	13.31	0.00176	0.0177
trabecula morphogenesis (GO:0061383)	47	3	0.23	+	13.31	0.00176	0.0177
sensory perception of mechanical stimulus (GO:0050954)	176	5	0.84	+	5.92	0.00177	0.0178
regulation of cell cycle G1/S phase transition (GO:1902806)	176	5	0.84	+	5.92	0.00177	0.0178
regulation of cell projection assembly (GO:0060491)	177	5	0.85	+	5.89	0.00181	0.0182
regulation of mitotic cell cycle (GO:0007346)	686	10	3.29	+	3.04	0.00181	0.0182
detection of mechanical stimulus (GO:0050982)	48	3	0.23	+	13.03	0.00186	0.0186
positive regulation of pathway-restricted SMAD protein phosphorylation (GO:0010862)	48	3	0.23	+	13.03	0.00186	0.0186
substrate adhesion-dependent cell spreading (GO:0034446)	48	3	0.23	+	13.03	0.00186	0.0186
cellular response to BMP stimulus (GO:0071773)	105	4	0.5	+	7.94	0.00185	0.0186
response to BMP (GO:0071772)	105	4	0.5	+	7.94	0.00185	0.0186
genitalia development (GO:0048806)	48	3	0.23	+	13.03	0.00186	0.0187
regulation of release of cytochrome c from mitochondria (GO:0090199)	48	3	0.23	+	13.03	0.00186	0.0187
positive regulation of apoptotic signaling pathway (GO:2001235)	179	5	0.86	+	5.82	0.0019	0.019
negative regulation of extrinsic apoptotic signaling pathway (GO:2001237)	106	4	0.51	+	7.87	0.00192	0.0191
morphogenesis of an endothelium (GO:0003159)	12	2	0.06	+	34.75	0.00198	0.0195
female sex differentiation (GO:0046660)	107	4	0.51	+	7.79	0.00198	0.0195
nephric duct morphogenesis (GO:0072178)	12	2	0.06	+	34.75	0.00198	0.0196
positive regulation of hair follicle development (GO:0051798)	12	2	0.06	+	34.75	0.00198	0.0196
peripheral nervous system neuron development (GO:0048935)	12	2	0.06	+	34.75	0.00198	0.0196
peripheral nervous system neuron differentiation (GO:0048934)	12	2	0.06	+	34.75	0.00198	0.0196
negative regulation of leukocyte degranulation (GO:0043301)	12	2	0.06	+	34.75	0.00198	0.0196
neuron remodeling (GO:0016322)	12	2	0.06	+	34.75	0.00198	0.0196
regulation of humoral immune response mediated by circulating immunoglobulin (GO:0002923)	12	2	0.06	+	34.75	0.00198	0.0196
positive regulation of inflammatory response to antigenic stimulus (GO:0002863)	12	2	0.06	+	34.75	0.00198	0.0196
endothelial tube morphogenesis (GO:0061154)	12	2	0.06	+	34.75	0.00198	0.0196
endocrine process (GO:0050886)	49	3	0.24	+	12.77	0.00197	0.0196
negative regulation of developmental growth (GO:0048640)	107	4	0.51	+	7.79	0.00198	0.0196
cell-substrate adhesion (GO:0031589)	181	5	0.87	+	5.76	0.00199	0.0196
glomerular epithelial cell development (GO:0072310)	12	2	0.06	+	34.75	0.00198	0.0197
mammary gland epithelial cell proliferation (GO:0033598)	12	2	0.06	+	34.75	0.00198	0.0197
regulation of osteoclast development (GO:2001204)	12	2	0.06	+	34.75	0.00198	0.0197
I-kappaB phosphorylation (GO:0007252)	12	2	0.06	+	34.75	0.00198	0.0197
regulation of apoptotic DNA fragmentation (GO:1902510)	12	2	0.06	+	34.75	0.00198	0.0197
regulation of dendritic cell differentiation (GO:2001198)	12	2	0.06	+	34.75	0.00198	0.0197
epidermal growth factor receptor signaling pathway (GO:0007173)	49	3	0.24	+	12.77	0.00197	0.0197
regulation of JNK cascade (GO:0046328)	182	5	0.87	+	5.73	0.00204	0.0201
morphogenesis of an epithelial sheet (GO:0002011)	50	3	0.24	+	12.51	0.00208	0.0205
regulation of skeletal muscle tissue development (GO:0048641)	50	3	0.24	+	12.51	0.00208	0.0205
modification of morphology or physiology of other organism involved in symbiotic interaction (GO:0051817)	110	4	0.53	+	7.58	0.00218	0.0215
regulation of skeletal muscle satellite cell proliferation (GO:0014842)	13	2	0.06	+	32.08	0.00227	0.0221
regulation of tau-protein kinase activity (GO:1902947)	13	2	0.06	+	32.08	0.00227	0.0221
detection of mechanical stimulus involved in sensory perception of pain (GO:0050966)	13	2	0.06	+	32.08	0.00227	0.0222
regulation of heat generation (GO:0031650)	13	2	0.06	+	32.08	0.00227	0.0222
interleukin-15-mediated signaling pathway (GO:0035723)	13	2	0.06	+	32.08	0.00227	0.0222
regulation of apoptotic process involved in development (GO:1904748)	13	2	0.06	+	32.08	0.00227	0.0222
positive regulation of membrane invagination (GO:1905155)	13	2	0.06	+	32.08	0.00227	0.0222
positive regulation of hair cycle (GO:0042635)	13	2	0.06	+	32.08	0.00227	0.0222
cellular response to interferon-alpha (GO:0035457)	13	2	0.06	+	32.08	0.00227	0.0222
chronic inflammatory response (GO:0002544)	13	2	0.06	+	32.08	0.00227	0.0223
complement receptor mediated signaling pathway (GO:0002430)	13	2	0.06	+	32.08	0.00227	0.0223
positive regulation of cellular senescence (GO:2000774)	13	2	0.06	+	32.08	0.00227	0.0223
positive regulation of phagocytosis, engulfment (GO:0060100)	13	2	0.06	+	32.08	0.00227	0.0223
macrophage activation involved in immune response (GO:0002281)	13	2	0.06	+	32.08	0.00227	0.0223
regulation of apoptotic process involved in morphogenesis (GO:1902337)	13	2	0.06	+	32.08	0.00227	0.0223
regulation of cell proliferation involved in kidney development (GO:1901722)	13	2	0.06	+	32.08	0.00227	0.0223
cellular response to interleukin-15 (GO:0071350)	13	2	0.06	+	32.08	0.00227	0.0223
primary metabolic process (GO:0044238)	7465	51	35.8	+	1.42	0.00227	0.0224
smooth muscle contraction (GO:0006939)	52	3	0.25	+	12.03	0.00231	0.0225
aorta development (GO:0035904)	52	3	0.25	+	12.03	0.00231	0.0225
cellular response to steroid hormone stimulus (GO:0071383)	188	5	0.9	+	5.55	0.00234	0.0227
muscle structure development (GO:0061061)	481	8	2.31	+	3.47	0.00237	0.023
limbic system development (GO:0021761)	113	4	0.54	+	7.38	0.0024	0.0233
positive regulation of Notch signaling pathway (GO:0045747)	53	3	0.25	+	11.8	0.00243	0.0236
regulation of chondrocyte differentiation (GO:0032330)	53	3	0.25	+	11.8	0.00243	0.0236
positive regulation of phospholipid metabolic process (GO:1903727)	53	3	0.25	+	11.8	0.00243	0.0236
regulation of synaptic plasticity (GO:0048167)	190	5	0.91	+	5.49	0.00245	0.0237
negative regulation of pri-miRNA transcription by RNA polymerase II (GO:1902894)	14	2	0.07	+	29.79	0.00259	0.0247
columnar/cuboidal epithelial cell development (GO:0002066)	54	3	0.26	+	11.58	0.00256	0.0247
regulation of interleukin-1 secretion (GO:0050704)	54	3	0.26	+	11.58	0.00256	0.0247
regulation of substrate adhesion-dependent cell spreading (GO:1900024)	54	3	0.26	+	11.58	0.00256	0.0247
regulation of myeloid leukocyte mediated immunity (GO:0002886)	54	3	0.26	+	11.58	0.00256	0.0247
skin development (GO:0043588)	380	7	1.82	+	3.84	0.00256	0.0247
macrophage chemotaxis (GO:0048246)	14	2	0.07	+	29.79	0.00259	0.0248
positive regulation of receptor biosynthetic process (GO:0010870)	14	2	0.07	+	29.79	0.00259	0.0248
regulation of DNA catabolic process (GO:1903624)	14	2	0.07	+	29.79	0.00259	0.0248
type B pancreatic cell development (GO:0003323)	14	2	0.07	+	29.79	0.00259	0.0248
regulation of acute inflammatory response to antigenic stimulus (GO:0002864)	14	2	0.07	+	29.79	0.00259	0.0248
negative regulation of type 2 immune response (GO:0002829)	14	2	0.07	+	29.79	0.00259	0.0248
regulation of RNA polymerase II transcriptional preinitiation complex assembly (GO:0045898)	14	2	0.07	+	29.79	0.00259	0.0248
regulation of transcription regulatory region DNA binding (GO:2000677)	54	3	0.26	+	11.58	0.00256	0.0248
hematopoietic stem cell proliferation (GO:0071425)	14	2	0.07	+	29.79	0.00259	0.0249
left/right axis specification (GO:0070986)	14	2	0.07	+	29.79	0.00259	0.0249
positive regulation of interleukin-2 biosynthetic process (GO:0045086)	14	2	0.07	+	29.79	0.00259	0.0249
response to interleukin-15 (GO:0070672)	14	2	0.07	+	29.79	0.00259	0.0249
lens fiber cell development (GO:0070307)	14	2	0.07	+	29.79	0.00259	0.0249
detection of other organism (GO:0098543)	14	2	0.07	+	29.79	0.00259	0.0249
establishment or maintenance of transmembrane electrochemical gradient (GO:0010248)	14	2	0.07	+	29.79	0.00259	0.025
growth hormone receptor signaling pathway via JAK-STAT (GO:0060397)	14	2	0.07	+	29.79	0.00259	0.025
cell killing (GO:0001906)	116	4	0.56	+	7.19	0.00263	0.0251
formation of primary germ layer (GO:0001704)	116	4	0.56	+	7.19	0.00263	0.0251
response to alkaloid (GO:0043279)	116	4	0.56	+	7.19	0.00263	0.0251
regulation of lipid catabolic process (GO:0050994)	55	3	0.26	+	11.37	0.00269	0.0256
response to gamma radiation (GO:0010332)	55	3	0.26	+	11.37	0.00269	0.0256
regulation of complement activation (GO:0030449)	117	4	0.56	+	7.13	0.00271	0.0258
regulation of morphogenesis of a branching structure (GO:0060688)	56	3	0.27	+	11.17	0.00283	0.0269
regulation of cell-matrix adhesion (GO:0001952)	119	4	0.57	+	7.01	0.00287	0.0273
positive regulation of mitochondrion organization (GO:0010822)	119	4	0.57	+	7.01	0.00287	0.0273
mitochondrial fusion (GO:0008053)	15	2	0.07	+	27.8	0.00293	0.0275
positive regulation of cell aging (GO:0090343)	15	2	0.07	+	27.8	0.00293	0.0276
positive regulation of ruffle assembly (GO:1900029)	15	2	0.07	+	27.8	0.00293	0.0276
regulation of odontogenesis of dentin-containing tooth (GO:0042487)	15	2	0.07	+	27.8	0.00293	0.0276
mitochondrial outer membrane permeabilization (GO:0097345)	15	2	0.07	+	27.8	0.00293	0.0276
positive regulation of exosomal secretion (GO:1903543)	15	2	0.07	+	27.8	0.00293	0.0276
regulation of skeletal muscle cell proliferation (GO:0014857)	15	2	0.07	+	27.8	0.00293	0.0276
transmembrane receptor protein serine/threonine kinase signaling pathway (GO:0007178)	198	5	0.95	+	5.27	0.00291	0.0276
regulation of phagocytosis, engulfment (GO:0060099)	15	2	0.07	+	27.8	0.00293	0.0277
V(D)J recombination (GO:0033151)	15	2	0.07	+	27.8	0.00293	0.0277
interleukin-1 beta production (GO:0032611)	15	2	0.07	+	27.8	0.00293	0.0277
response to redox state (GO:0051775)	15	2	0.07	+	27.8	0.00293	0.0277
positive regulation of killing of cells of other organism (GO:0051712)	15	2	0.07	+	27.8	0.00293	0.0277
regulation of endothelial cell development (GO:1901550)	15	2	0.07	+	27.8	0.00293	0.0277
negative regulation of bone resorption (GO:0045779)	15	2	0.07	+	27.8	0.00293	0.0278
regulation of establishment of endothelial barrier (GO:1903140)	15	2	0.07	+	27.8	0.00293	0.0278
regulation of megakaryocyte differentiation (GO:0045652)	57	3	0.27	+	10.97	0.00296	0.0279
activation of MAPKK activity (GO:0000186)	57	3	0.27	+	10.97	0.00296	0.0279
response to ketone (GO:1901654)	200	5	0.96	+	5.21	0.00303	0.0285
homotypic cell-cell adhesion (GO:0034109)	58	3	0.28	+	10.79	0.00311	0.0291
sprouting angiogenesis (GO:0002040)	58	3	0.28	+	10.79	0.00311	0.0291
regulation of phosphatidylinositol 3-kinase activity (GO:0043551)	58	3	0.28	+	10.79	0.00311	0.0291
defense response to virus (GO:0051607)	201	5	0.96	+	5.19	0.0031	0.0291
cerebral cortex development (GO:0021987)	122	4	0.59	+	6.84	0.00313	0.0294
positive regulation of cell cycle process (GO:0090068)	294	6	1.41	+	4.26	0.00317	0.0297
regulation of fat cell differentiation (GO:0045598)	123	4	0.59	+	6.78	0.00322	0.0302
regulation of protein stability (GO:0031647)	295	6	1.41	+	4.24	0.00323	0.0302
vascular smooth muscle contraction (GO:0014829)	16	2	0.08	+	26.06	0.00328	0.0304
positive regulation of type 2 immune response (GO:0002830)	16	2	0.08	+	26.06	0.00328	0.0304
regulation of vasoconstriction (GO:0019229)	59	3	0.28	+	10.6	0.00325	0.0304
negative regulation of kidney development (GO:0090185)	16	2	0.08	+	26.06	0.00328	0.0305
positive regulation of calcineurin-mediated signaling (GO:0106058)	16	2	0.08	+	26.06	0.00328	0.0305
regulation of membrane invagination (GO:1905153)	16	2	0.08	+	26.06	0.00328	0.0305
regulation of metallopeptidase activity (GO:1905048)	16	2	0.08	+	26.06	0.00328	0.0305
positive regulation of execution phase of apoptosis (GO:1900119)	16	2	0.08	+	26.06	0.00328	0.0305
regulation of exosomal secretion (GO:1903541)	16	2	0.08	+	26.06	0.00328	0.0305
leukocyte migration involved in inflammatory response (GO:0002523)	16	2	0.08	+	26.06	0.00328	0.0306
mesenchymal to epithelial transition (GO:0060231)	16	2	0.08	+	26.06	0.00328	0.0306
nephric duct development (GO:0072176)	16	2	0.08	+	26.06	0.00328	0.0306
interleukin-1 production (GO:0032612)	16	2	0.08	+	26.06	0.00328	0.0306
positive regulation of calcineurin-NFAT signaling cascade (GO:0070886)	16	2	0.08	+	26.06	0.00328	0.0306
positive regulation of heterotypic cell-cell adhesion (GO:0034116)	16	2	0.08	+	26.06	0.00328	0.0307
Notch signaling pathway (GO:0007219)	124	4	0.59	+	6.73	0.00332	0.0307
positive regulation of autophagy (GO:0010508)	124	4	0.59	+	6.73	0.00332	0.0307
intracellular receptor signaling pathway (GO:0030522)	205	5	0.98	+	5.09	0.00336	0.0311
embryonic digit morphogenesis (GO:0042733)	60	3	0.29	+	10.43	0.0034	0.0314
telencephalon cell migration (GO:0022029)	60	3	0.29	+	10.43	0.0034	0.0315
regulation of peptidyl-lysine acetylation (GO:2000756)	60	3	0.29	+	10.43	0.0034	0.0315
ear morphogenesis (GO:0042471)	125	4	0.6	+	6.67	0.00341	0.0315
positive regulation of intrinsic apoptotic signaling pathway (GO:2001244)	61	3	0.29	+	10.25	0.00356	0.0328
inner ear receptor cell differentiation (GO:0060113)	61	3	0.29	+	10.25	0.00356	0.0328
cell-matrix adhesion (GO:0007160)	127	4	0.61	+	6.57	0.0036	0.0332
regulation of amyloid-beta clearance (GO:1900221)	17	2	0.08	+	24.53	0.00366	0.0334
negative regulation of macrophage activation (GO:0043031)	17	2	0.08	+	24.53	0.00366	0.0334
negative regulation of bone remodeling (GO:0046851)	17	2	0.08	+	24.53	0.00366	0.0334
negative regulation of glucose transmembrane transport (GO:0010829)	17	2	0.08	+	24.53	0.00366	0.0334
maintenance of cell polarity (GO:0030011)	17	2	0.08	+	24.53	0.00366	0.0334
organic substance metabolic process (GO:0071704)	7840	52	37.6	+	1.38	0.00366	0.0334
positive regulation of interleukin-17 production (GO:0032740)	17	2	0.08	+	24.53	0.00366	0.0335
positive regulation of mitochondrial membrane permeability involved in apoptotic process (GO:1902110)	17	2	0.08	+	24.53	0.00366	0.0335
positive regulation of amyloid-beta formation (GO:1902004)	17	2	0.08	+	24.53	0.00366	0.0335
positive regulation of protein localization to cell surface (GO:2000010)	17	2	0.08	+	24.53	0.00366	0.0335
negative regulation of B cell proliferation (GO:0030889)	17	2	0.08	+	24.53	0.00366	0.0335
regulation of granulocyte differentiation (GO:0030852)	17	2	0.08	+	24.53	0.00366	0.0335
regulation of endocytosis (GO:0030100)	209	5	1	+	4.99	0.00364	0.0335
regulation of cysteine-type endopeptidase activity involved in apoptotic signaling pathway (GO:2001267)	17	2	0.08	+	24.53	0.00366	0.0336
positive regulation of neuron migration (GO:2001224)	17	2	0.08	+	24.53	0.00366	0.0336
ureter development (GO:0072189)	17	2	0.08	+	24.53	0.00366	0.0336
estrous cycle (GO:0044849)	17	2	0.08	+	24.53	0.00366	0.0336
positive regulation of interleukin-8 secretion (GO:2000484)	17	2	0.08	+	24.53	0.00366	0.0336
segment specification (GO:0007379)	17	2	0.08	+	24.53	0.00366	0.0337
nephron development (GO:0072006)	128	4	0.61	+	6.52	0.0037	0.0337
B cell receptor signaling pathway (GO:0050853)	128	4	0.61	+	6.52	0.0037	0.0337
specification of symmetry (GO:0009799)	128	4	0.61	+	6.52	0.0037	0.0337
positive regulation of GTPase activity (GO:0043547)	407	7	1.95	+	3.59	0.00371	0.0337
regulation of pathway-restricted SMAD protein phosphorylation (GO:0060393)	62	3	0.3	+	10.09	0.00372	0.0338
cellular response to unfolded protein (GO:0034620)	129	4	0.62	+	6.47	0.0038	0.0345
negative regulation of phosphoprotein phosphatase activity (GO:0032515)	63	3	0.3	+	9.93	0.00388	0.0352
regulation of antigen receptor-mediated signaling pathway (GO:0050854)	63	3	0.3	+	9.93	0.00388	0.0352
regulation of embryonic development (GO:0045995)	130	4	0.62	+	6.42	0.00391	0.0354
female gamete generation (GO:0007292)	131	4	0.63	+	6.37	0.00401	0.0363
liver development (GO:0001889)	131	4	0.63	+	6.37	0.00401	0.0363
regulation of immunoglobulin secretion (GO:0051023)	18	2	0.09	+	23.17	0.00405	0.0365
membrane protein intracellular domain proteolysis (GO:0031293)	18	2	0.09	+	23.17	0.00405	0.0365
myeloid dendritic cell differentiation (GO:0043011)	18	2	0.09	+	23.17	0.00405	0.0365
monocyte differentiation (GO:0030224)	18	2	0.09	+	23.17	0.00405	0.0365
renal filtration cell differentiation (GO:0061318)	18	2	0.09	+	23.17	0.00405	0.0365
regulation of killing of cells of other organism (GO:0051709)	18	2	0.09	+	23.17	0.00405	0.0366
detection of temperature stimulus involved in sensory perception of pain (GO:0050965)	18	2	0.09	+	23.17	0.00405	0.0366
detection of temperature stimulus involved in sensory perception (GO:0050961)	18	2	0.09	+	23.17	0.00405	0.0366
lymph node development (GO:0048535)	18	2	0.09	+	23.17	0.00405	0.0366
mononuclear cell differentiation (GO:1903131)	18	2	0.09	+	23.17	0.00405	0.0367
glomerular visceral epithelial cell differentiation (GO:0072112)	18	2	0.09	+	23.17	0.00405	0.0367
heart looping (GO:0001947)	65	3	0.31	+	9.62	0.00422	0.038
actin cytoskeleton reorganization (GO:0031532)	65	3	0.31	+	9.62	0.00422	0.038
negative regulation of mitotic cell cycle (GO:0045930)	313	6	1.5	+	4	0.00428	0.0385
hepaticobiliary system development (GO:0061008)	134	4	0.64	+	6.22	0.00434	0.0389
aromatic compound biosynthetic process (GO:0019438)	1179	13	5.65	+	2.3	0.00435	0.0391
positive regulation of cell killing (GO:0031343)	66	3	0.32	+	9.48	0.0044	0.0394
mechanoreceptor differentiation (GO:0042490)	66	3	0.32	+	9.48	0.0044	0.0394
cranial skeletal system development (GO:1904888)	66	3	0.32	+	9.48	0.0044	0.0395
eosinophil chemotaxis (GO:0048245)	19	2	0.09	+	21.95	0.00446	0.0396
catecholamine biosynthetic process (GO:0042423)	19	2	0.09	+	21.95	0.00446	0.0396
platelet formation (GO:0030220)	19	2	0.09	+	21.95	0.00446	0.0396
type B pancreatic cell differentiation (GO:0003309)	19	2	0.09	+	21.95	0.00446	0.0396
thymic T cell selection (GO:0045061)	19	2	0.09	+	21.95	0.00446	0.0397
leukocyte tethering or rolling (GO:0050901)	19	2	0.09	+	21.95	0.00446	0.0397
catechol-containing compound biosynthetic process (GO:0009713)	19	2	0.09	+	21.95	0.00446	0.0397
detection of external biotic stimulus (GO:0098581)	19	2	0.09	+	21.95	0.00446	0.0397
negative regulation of catabolic process (GO:0009895)	316	6	1.52	+	3.96	0.00448	0.0397
regulation of mammary gland epithelial cell proliferation (GO:0033599)	19	2	0.09	+	21.95	0.00446	0.0398
positive regulation of cardiac muscle cell differentiation (GO:2000727)	19	2	0.09	+	21.95	0.00446	0.0398
glomerulus vasculature development (GO:0072012)	19	2	0.09	+	21.95	0.00446	0.0398
glandular epithelial cell development (GO:0002068)	19	2	0.09	+	21.95	0.00446	0.0398
positive regulation of endothelial cell apoptotic process (GO:2000353)	19	2	0.09	+	21.95	0.00446	0.0398
immune response-regulating cell surface receptor signaling pathway involved in phagocytosis (GO:0002433)	135	4	0.65	+	6.18	0.00445	0.0398
Fc-gamma receptor signaling pathway involved in phagocytosis (GO:0038096)	135	4	0.65	+	6.18	0.00445	0.0398
positive regulation of hormone secretion (GO:0046887)	135	4	0.65	+	6.18	0.00445	0.0398
striatum development (GO:0021756)	19	2	0.09	+	21.95	0.00446	0.0399
mitochondrial outer membrane permeabilization involved in programmed cell death (GO:1902686)	19	2	0.09	+	21.95	0.00446	0.0399
glomerular epithelial cell differentiation (GO:0072311)	19	2	0.09	+	21.95	0.00446	0.0399
anatomical structure maturation (GO:0071695)	136	4	0.65	+	6.13	0.00456	0.0404
regulation of lipid kinase activity (GO:0043550)	67	3	0.32	+	9.34	0.00458	0.0405
regulation of glutamate receptor signaling pathway (GO:1900449)	67	3	0.32	+	9.34	0.00458	0.0405
regulation of muscle cell apoptotic process (GO:0010660)	67	3	0.32	+	9.34	0.00458	0.0405
mitochondrial transport (GO:0006839)	221	5	1.06	+	4.72	0.00459	0.0405
maternal process involved in female pregnancy (GO:0060135)	67	3	0.32	+	9.34	0.00458	0.0406
regulation of tube diameter (GO:0035296)	137	4	0.66	+	6.09	0.00468	0.0412
Fc receptor mediated stimulatory signaling pathway (GO:0002431)	137	4	0.66	+	6.09	0.00468	0.0413
regulation of blood vessel diameter (GO:0097746)	137	4	0.66	+	6.09	0.00468	0.0413
regulation of exocytosis (GO:0017157)	222	5	1.06	+	4.7	0.00467	0.0413
cellular metabolic process (GO:0044237)	7652	51	36.7	+	1.39	0.00473	0.0417
negative regulation of protein dephosphorylation (GO:0035308)	68	3	0.33	+	9.2	0.00477	0.0419
negative regulation of epithelial cell migration (GO:0010633)	68	3	0.33	+	9.2	0.00477	0.0419
regulation of sprouting angiogenesis (GO:1903670)	68	3	0.33	+	9.2	0.00477	0.0419
neuron fate commitment (GO:0048663)	68	3	0.33	+	9.2	0.00477	0.042
regulation of tube size (GO:0035150)	138	4	0.66	+	6.04	0.0048	0.0421
negative regulation of lipid storage (GO:0010888)	20	2	0.1	+	20.85	0.0049	0.0428
regulation of production of miRNAs involved in gene silencing by miRNA (GO:1903798)	20	2	0.1	+	20.85	0.0049	0.0428
embryonic hemopoiesis (GO:0035162)	20	2	0.1	+	20.85	0.0049	0.0428
eosinophil migration (GO:0072677)	20	2	0.1	+	20.85	0.0049	0.0428
growth hormone receptor signaling pathway (GO:0060396)	20	2	0.1	+	20.85	0.0049	0.0429
regulation of hair follicle development (GO:0051797)	20	2	0.1	+	20.85	0.0049	0.0429
response to muramyl dipeptide (GO:0032495)	20	2	0.1	+	20.85	0.0049	0.0429
platelet morphogenesis (GO:0036344)	20	2	0.1	+	20.85	0.0049	0.0429
positive regulation of cellular response to oxidative stress (GO:1900409)	20	2	0.1	+	20.85	0.0049	0.0429
response to ethanol (GO:0045471)	139	4	0.67	+	6	0.00492	0.0429
Fc-gamma receptor signaling pathway (GO:0038094)	139	4	0.67	+	6	0.00492	0.0429
positive regulation of fatty acid biosynthetic process (GO:0045723)	20	2	0.1	+	20.85	0.0049	0.043
vascular endothelial growth factor receptor signaling pathway (GO:0048010)	69	3	0.33	+	9.07	0.00496	0.0432
regulation of synaptic transmission, glutamatergic (GO:0051966)	70	3	0.34	+	8.94	0.00515	0.0449
regulation of phospholipase activity (GO:0010517)	70	3	0.34	+	8.94	0.00515	0.0449
cell-cell junction organization (GO:0045216)	141	4	0.68	+	5.92	0.00516	0.045
pattern specification process (GO:0007389)	434	7	2.08	+	3.36	0.00522	0.0454
hypothalamus development (GO:0021854)	21	2	0.1	+	19.86	0.00535	0.046
determination of heart left/right asymmetry (GO:0061371)	71	3	0.34	+	8.81	0.00535	0.046
establishment of protein localization to mitochondrion (GO:0072655)	71	3	0.34	+	8.81	0.00535	0.046
regulation of cartilage development (GO:0061035)	71	3	0.34	+	8.81	0.00535	0.046
embryonic heart tube morphogenesis (GO:0003143)	71	3	0.34	+	8.81	0.00535	0.046
positive regulation of protein export from nucleus (GO:0046827)	21	2	0.1	+	19.86	0.00535	0.0461
kidney vasculature development (GO:0061440)	21	2	0.1	+	19.86	0.00535	0.0461
renal system vasculature development (GO:0061437)	21	2	0.1	+	19.86	0.00535	0.0461
positive regulation of amyloid precursor protein catabolic process (GO:1902993)	21	2	0.1	+	19.86	0.00535	0.0461
regulation of behavior (GO:0050795)	71	3	0.34	+	8.81	0.00535	0.0461
animal organ maturation (GO:0048799)	21	2	0.1	+	19.86	0.00535	0.0462
positive regulation of cell migration involved in sprouting angiogenesis (GO:0090050)	21	2	0.1	+	19.86	0.00535	0.0462
sympathetic nervous system development (GO:0048485)	21	2	0.1	+	19.86	0.00535	0.0462
enteroendocrine cell differentiation (GO:0035883)	21	2	0.1	+	19.86	0.00535	0.0462
macromolecule localization (GO:0033036)	2537	22	12.17	+	1.81	0.00531	0.0462
cellular response to growth hormone stimulus (GO:0071378)	21	2	0.1	+	19.86	0.00535	0.0463
regulation of interleukin-2 biosynthetic process (GO:0045076)	21	2	0.1	+	19.86	0.00535	0.0463
positive regulation of phosphoprotein phosphatase activity (GO:0032516)	21	2	0.1	+	19.86	0.00535	0.0463
positive regulation of lymphocyte chemotaxis (GO:0140131)	21	2	0.1	+	19.86	0.00535	0.0463
positive regulation of stem cell differentiation (GO:2000738)	21	2	0.1	+	19.86	0.00535	0.0464
Sertoli cell differentiation (GO:0060008)	21	2	0.1	+	19.86	0.00535	0.0464
regulation of production of small RNA involved in gene silencing by RNA (GO:0070920)	21	2	0.1	+	19.86	0.00535	0.0464
negative regulation of chemokine production (GO:0032682)	21	2	0.1	+	19.86	0.00535	0.0464
positive regulation of extracellular matrix organization (GO:1903055)	21	2	0.1	+	19.86	0.00535	0.0465
regulation of protein acetylation (GO:1901983)	72	3	0.35	+	8.69	0.00556	0.0476
response to ionizing radiation (GO:0010212)	144	4	0.69	+	5.79	0.00555	0.0476
interferon-gamma-mediated signaling pathway (GO:0060333)	72	3	0.35	+	8.69	0.00556	0.0477
regulation of lipid localization (GO:1905952)	145	4	0.7	+	5.75	0.00568	0.0487
neuronal stem cell population maintenance (GO:0097150)	22	2	0.11	+	18.96	0.00581	0.0494
outflow tract morphogenesis (GO:0003151)	73	3	0.35	+	8.57	0.00576	0.0494
positive regulation of mitochondrial membrane permeability (GO:0035794)	22	2	0.11	+	18.96	0.00581	0.0495
detection of temperature stimulus (GO:0016048)	22	2	0.11	+	18.96	0.00581	0.0495
left/right pattern formation (GO:0060972)	22	2	0.11	+	18.96	0.00581	0.0495
negative regulation of cardiac muscle cell apoptotic process (GO:0010667)	22	2	0.11	+	18.96	0.00581	0.0495
cell cycle arrest (GO:0007050)	146	4	0.7	+	5.71	0.00582	0.0495
protein insertion into mitochondrial membrane (GO:0051204)	22	2	0.11	+	18.96	0.00581	0.0496
detection of biotic stimulus (GO:0009595)	22	2	0.11	+	18.96	0.00581	0.0496
positive regulation of nitric-oxide synthase activity (GO:0051000)	22	2	0.11	+	18.96	0.00581	0.0496
negative regulation of tissue remodeling (GO:0034104)	22	2	0.11	+	18.96	0.00581	0.0497
release of cytochrome c from mitochondria (GO:0001836)	22	2	0.11	+	18.96	0.00581	0.0497
vacuolar acidification (GO:0007035)	22	2	0.11	+	18.96	0.00581	0.0497
glomerular epithelium development (GO:0072010)	22	2	0.11	+	18.96	0.00581	0.0497
branching involved in mammary gland duct morphogenesis (GO:0060444)	22	2	0.11	+	18.96	0.00581	0.0498

## Sheet: 179 I-N genes_CC_SpC-9dpi
179 common genes_Immune-Nervous-Systems_Spinal cord-9dpi
GO cellular component complete	Number of genes - REFLIST (20851)	Number of genes - Analyzed (94)	Expected	Over/under-represented	Fold Enrichment	raw P-value	FDR
cell surface (GO:0009986)	950	45	8.66	+	5.2	1.24e-19	2.49e-16
cell projection (GO:0042995)	2285	67	20.82	+	3.22	1.39e-18	1.4e-15
secretory granule (GO:0030141)	843	39	7.68	+	5.08	1.09e-16	4.39e-14
plasma membrane bounded cell projection (GO:0120025)	2197	63	20.02	+	3.15	6.61e-17	4.44e-14
plasma membrane (GO:0005886)	5738	107	52.29	+	2.05	1.33e-16	4.46e-14
cell periphery (GO:0071944)	5868	109	53.47	+	2.04	9.59e-17	4.83e-14
somatodendritic compartment (GO:0036477)	860	39	7.84	+	4.98	2.06e-16	5.19e-14
protein-containing complex (GO:0032991)	5484	104	49.97	+	2.08	1.88e-16	5.41e-14
perinuclear region of cytoplasm (GO:0048471)	734	36	6.69	+	5.38	3.5e-16	7.84e-14
cell (GO:0005623)	1115	43	10.16	+	4.23	1.22e-15	2.45e-13
secretory vesicle (GO:0099503)	1011	40	9.21	+	4.34	6.48e-15	1.19e-12
cell body (GO:0044297)	590	31	5.38	+	5.77	8.8e-15	1.48e-12
extracellular region (GO:0005576)	4380	88	39.91	+	2.2	1.41e-14	2.19e-12
neuron projection (GO:0043005)	1379	46	12.57	+	3.66	1.82e-14	2.62e-12
vesicle (GO:0031982)	3877	80	35.33	+	2.26	9.48e-14	1.27e-11
cytoplasm (GO:0005737)	11476	154	104.57	+	1.47	1.03e-13	1.3e-11
extracellular space (GO:0005615)	3343	72	30.46	+	2.36	5.04e-13	5.97e-11
neuronal cell body (GO:0043025)	521	27	4.75	+	5.69	7.61e-13	8.51e-11
whole membrane (GO:0098805)	1701	48	15.5	+	3.1	1.77e-12	1.87e-10
cytoplasmic vesicle (GO:0031410)	2383	57	21.71	+	2.62	6.07e-12	6.12e-10
intracellular vesicle (GO:0097708)	2386	57	21.74	+	2.62	6.38e-12	6.12e-10
cell junction (GO:0030054)	1365	41	12.44	+	3.3	1.66e-11	1.52e-09
membrane-bounded organelle (GO:0043227)	12584	158	114.67	+	1.38	2.14e-11	1.87e-09
dendrite (GO:0030425)	619	27	5.64	+	4.79	3.37e-11	2.83e-09
dendritic tree (GO:0097447)	621	27	5.66	+	4.77	3.62e-11	2.91e-09
focal adhesion (GO:0005925)	409	22	3.73	+	5.9	6.03e-11	4.67e-09
cell-substrate adherens junction (GO:0005924)	412	22	3.75	+	5.86	6.89e-11	5.14e-09
cell-substrate junction (GO:0030055)	416	22	3.79	+	5.8	8.21e-11	5.91e-09
site of polarized growth (GO:0030427)	194	16	1.77	+	9.05	8.55e-11	5.94e-09
intracellular (GO:0005622)	14473	170	131.88	+	1.29	9.72e-11	6.53e-09
adherens junction (GO:0005912)	555	25	5.06	+	4.94	1.01e-10	6.57e-09
plasma membrane region (GO:0098590)	1157	36	10.54	+	3.41	1.42e-10	8.94e-09
anchoring junction (GO:0070161)	571	25	5.2	+	4.8	1.79e-10	1.09e-08
secretory granule lumen (GO:0034774)	320	19	2.92	+	6.52	2.76e-10	1.63e-08
membrane raft (GO:0045121)	322	19	2.93	+	6.48	3.05e-10	1.75e-08
membrane microdomain (GO:0098857)	323	19	2.94	+	6.46	3.2e-10	1.79e-08
cytoplasmic vesicle lumen (GO:0060205)	324	19	2.95	+	6.44	3.36e-10	1.83e-08
vesicle lumen (GO:0031983)	326	19	2.97	+	6.4	3.71e-10	1.97e-08
growth cone (GO:0030426)	186	15	1.69	+	8.85	4.53e-10	2.34e-08
membrane region (GO:0098589)	336	19	3.06	+	6.21	5.99e-10	3.02e-08
integral component of plasma membrane (GO:0005887)	1639	42	14.94	+	2.81	1.08e-09	5.33e-08
cellular anatomical entity (GO:0110165)	18628	190	169.74	+	1.12	1.26e-09	6.04e-08
axon (GO:0030424)	641	25	5.84	+	4.28	1.77e-09	8.28e-08
cytosol (GO:0005829)	5199	86	47.37	+	1.82	1.94e-09	8.69e-08
postsynapse (GO:0098794)	644	25	5.87	+	4.26	1.94e-09	8.86e-08
transcription factor complex (GO:0005667)	367	19	3.34	+	5.68	2.4e-09	1.05e-07
intracellular organelle (GO:0043229)	12678	154	115.53	+	1.33	3.28e-09	1.41e-07
endomembrane system (GO:0012505)	4563	78	41.58	+	1.88	3.45e-09	1.45e-07
synapse (GO:0045202)	1374	37	12.52	+	2.96	3.64e-09	1.5e-07
extracellular vesicle (GO:1903561)	2119	48	19.31	+	2.49	3.83e-09	1.54e-07
intrinsic component of plasma membrane (GO:0031226)	1715	42	15.63	+	2.69	4.04e-09	1.57e-07
extracellular organelle (GO:0043230)	2124	48	19.35	+	2.48	4e-09	1.58e-07
intracellular membrane-bounded organelle (GO:0043231)	10886	139	99.2	+	1.4	5.12e-09	1.95e-07
membrane (GO:0016020)	9854	130	89.79	+	1.45	5.26e-09	1.96e-07
cellular_component (GO:0005575)	18818	190	171.47	+	1.11	7.22e-09	2.6e-07
extracellular exosome (GO:0070062)	2098	47	19.12	+	2.46	7.43e-09	2.63e-07
Unclassified (UNCLASSIFIED)	2033	0	18.53	-	< 0.01	7.22e-09	2.65e-07
nucleus (GO:0005634)	7498	107	68.32	+	1.57	1.93e-08	6.71e-07
organelle (GO:0043226)	13710	160	124.93	+	1.28	1.97e-08	6.72e-07
side of membrane (GO:0098552)	626	23	5.7	+	4.03	2.42e-08	8.12e-07
receptor complex (GO:0043235)	524	21	4.77	+	4.4	2.49e-08	8.22e-07
distal axon (GO:0150034)	306	16	2.79	+	5.74	4.08e-08	1.33e-06
cell leading edge (GO:0031252)	417	18	3.8	+	4.74	9.14e-08	2.92e-06
membrane-enclosed lumen (GO:0031974)	5870	86	53.49	+	1.61	6.08e-07	1.86e-05
external side of plasma membrane (GO:0009897)	427	17	3.89	+	4.37	6.26e-07	1.88e-05
intracellular organelle lumen (GO:0070013)	5870	86	53.49	+	1.61	6.08e-07	1.88e-05
organelle lumen (GO:0043233)	5870	86	53.49	+	1.61	6.08e-07	1.91e-05
dendritic spine (GO:0043197)	173	11	1.58	+	6.98	9.49e-07	2.81e-05
neuron spine (GO:0044309)	175	11	1.59	+	6.9	1.06e-06	3.08e-05
apical part of cell (GO:0045177)	400	16	3.64	+	4.39	1.28e-06	3.68e-05
non-membrane-bounded organelle (GO:0043228)	4947	75	45.08	+	1.66	1.91e-06	5.41e-05
Golgi apparatus (GO:0005794)	1593	34	14.52	+	2.34	3.66e-06	9.97e-05
cell projection membrane (GO:0031253)	334	14	3.04	+	4.6	3.6e-06	0.000101
chromosome (GO:0005694)	1717	36	15.65	+	2.3	3.64e-06	0.000101
secretory granule membrane (GO:0030667)	301	13	2.74	+	4.74	5.94e-06	0.00016
vacuole (GO:0005773)	807	22	7.35	+	2.99	6.25e-06	0.000166
actin-based cell projection (GO:0098858)	214	11	1.95	+	5.64	6.67e-06	0.000174
intracellular non-membrane-bounded organelle (GO:0043232)	4937	73	44.99	+	1.62	6.9e-06	0.000178
collagen-containing extracellular matrix (GO:0062023)	407	15	3.71	+	4.04	7.21e-06	0.000184
phagocytic cup (GO:0001891)	27	5	0.25	+	20.32	9.41e-06	0.000234
filopodium (GO:0030175)	106	8	0.97	+	8.28	9.28e-06	0.000234
basolateral plasma membrane (GO:0016323)	223	11	2.03	+	5.41	9.66e-06	0.000237
glutamatergic synapse (GO:0098978)	366	14	3.34	+	4.2	9.82e-06	0.000238
nucleoplasm (GO:0005654)	3982	62	36.29	+	1.71	1.08e-05	0.000259
extracellular matrix (GO:0031012)	533	17	4.86	+	3.5	1.1e-05	0.000261
perikaryon (GO:0043204)	153	9	1.39	+	6.46	1.7e-05	0.000399
integrin complex (GO:0008305)	32	5	0.29	+	17.15	1.96e-05	0.000455
lamellipodium (GO:0030027)	198	10	1.8	+	5.54	2.04e-05	0.000466
specific granule (GO:0042581)	160	9	1.46	+	6.17	2.38e-05	0.000539
postsynaptic density (GO:0014069)	347	13	3.16	+	4.11	2.53e-05	0.000567
nuclear lumen (GO:0031981)	4750	69	43.28	+	1.59	2.69e-05	0.000595
asymmetric synapse (GO:0032279)	351	13	3.2	+	4.06	2.84e-05	0.000622
membrane protein complex (GO:0098796)	1305	28	11.89	+	2.35	2.97e-05	0.000643
plasma membrane protein complex (GO:0098797)	701	19	6.39	+	2.97	3.01e-05	0.000644
nuclear transcription factor complex (GO:0044798)	209	10	1.9	+	5.25	3.17e-05	0.000671
protein complex involved in cell adhesion (GO:0098636)	37	5	0.34	+	14.83	3.69e-05	0.000775
RNA polymerase II transcription factor complex (GO:0090575)	170	9	1.55	+	5.81	3.75e-05	0.000778
cytoplasmic vesicle membrane (GO:0030659)	782	20	7.13	+	2.81	4.08e-05	0.00084
plasma membrane signaling receptor complex (GO:0098802)	314	12	2.86	+	4.19	4.33e-05	0.000882
phagocytic vesicle (GO:0045335)	134	8	1.22	+	6.55	4.56e-05	0.00091
nuclear chromosome (GO:0000228)	1264	27	11.52	+	2.34	4.52e-05	0.000911
postsynaptic specialization (GO:0099572)	372	13	3.39	+	3.84	5.06e-05	0.000999
neuron to neuron synapse (GO:0098984)	375	13	3.42	+	3.8	5.47e-05	0.00107
Bcl-2 family protein complex (GO:0097136)	6	3	0.05	+	54.87	5.85e-05	0.00112
vesicle membrane (GO:0012506)	803	20	7.32	+	2.73	5.84e-05	0.00113
endocytic vesicle (GO:0030139)	327	12	2.98	+	4.03	6.31e-05	0.0012
cell cortex (GO:0005938)	328	12	2.99	+	4.01	6.49e-05	0.00122
bounding membrane of organelle (GO:0098588)	2104	37	19.17	+	1.93	9.59e-05	0.00179
lysosome (GO:0005764)	706	18	6.43	+	2.8	0.000105	0.00192
lytic vacuole (GO:0000323)	706	18	6.43	+	2.8	0.000105	0.00193
extrinsic component of membrane (GO:0019898)	297	11	2.71	+	4.06	0.000118	0.00214
chromatin (GO:0000785)	1214	25	11.06	+	2.26	0.000147	0.00265
nonhomologous end joining complex (GO:0070419)	9	3	0.08	+	36.58	0.00015	0.00268
tertiary granule (GO:0070820)	164	8	1.49	+	5.35	0.000174	0.00308
basal part of cell (GO:0045178)	54	5	0.49	+	10.16	0.000192	0.00337
ciliary rootlet (GO:0035253)	11	3	0.1	+	29.93	0.000245	0.00426
ruffle (GO:0001726)	176	8	1.6	+	4.99	0.000276	0.00475
nuclear chromatin (GO:0000790)	1034	22	9.42	+	2.33	0.000283	0.00484
apical plasma membrane (GO:0016324)	333	11	3.03	+	3.63	0.000307	0.0052
specific granule lumen (GO:0035580)	62	5	0.56	+	8.85	0.00035	0.00587
endoplasmic reticulum (GO:0005783)	1434	27	13.07	+	2.07	0.000431	0.00718
trans-Golgi network (GO:0005802)	240	9	2.19	+	4.12	0.000452	0.00734
telomere cap complex (GO:0000782)	14	3	0.13	+	23.52	0.000449	0.00735
nuclear telomere cap complex (GO:0000783)	14	3	0.13	+	23.52	0.000449	0.00741
BAK complex (GO:0097145)	2	2	0.02	+	> 100	0.000481	0.00769
CSF1-CSF1R complex (GO:1990682)	2	2	0.02	+	> 100	0.000481	0.00775
endosome (GO:0005768)	944	20	8.6	+	2.33	0.000601	0.00953
azurophil granule (GO:0042582)	154	7	1.4	+	4.99	0.000664	0.0104
primary lysosome (GO:0005766)	154	7	1.4	+	4.99	0.000664	0.0104
acrosomal vesicle (GO:0001669)	111	6	1.01	+	5.93	0.000683	0.0106
core-binding factor complex (GO:0016513)	3	2	0.03	+	73.16	0.000797	0.0122
Ku70:Ku80 complex (GO:0043564)	3	2	0.03	+	73.16	0.000797	0.0123
phagocytic vesicle membrane (GO:0030670)	76	5	0.69	+	7.22	0.000838	0.0127
extrinsic component of plasma membrane (GO:0019897)	165	7	1.5	+	4.66	0.000979	0.0147
cytoskeleton (GO:0005856)	2274	36	20.72	+	1.74	0.000997	0.0149
growth cone filopodium (GO:1990812)	4	2	0.04	+	54.87	0.00119	0.0173
ficolin-1-rich granule lumen (GO:1904813)	124	6	1.13	+	5.31	0.00118	0.0174
ficolin-1-rich granule (GO:0101002)	124	6	1.13	+	5.31	0.00118	0.0175
leading edge membrane (GO:0031256)	174	7	1.59	+	4.41	0.00132	0.0191
rough endoplasmic reticulum (GO:0005791)	85	5	0.77	+	6.46	0.00135	0.0194
vacuolar lumen (GO:0005775)	177	7	1.61	+	4.34	0.00145	0.0205
postsynaptic specialization, intracellular component (GO:0099091)	22	3	0.2	+	14.96	0.00144	0.0206
pore complex (GO:0046930)	23	3	0.21	+	14.31	0.00162	0.0228
sarcolemma (GO:0042383)	134	6	1.22	+	4.91	0.00173	0.0242
extrinsic component of cytoplasmic side of plasma membrane (GO:0031234)	93	5	0.85	+	5.9	0.00196	0.0273
ruffle membrane (GO:0032587)	94	5	0.86	+	5.84	0.00205	0.0283
gamma-secretase complex (GO:0070765)	6	2	0.05	+	36.58	0.00219	0.03
endocytic vesicle membrane (GO:0030666)	194	7	1.77	+	3.96	0.00239	0.0325
endoplasmic reticulum lumen (GO:0005788)	308	9	2.81	+	3.21	0.00243	0.0329
chromosome, telomeric region (GO:0000781)	147	6	1.34	+	4.48	0.0027	0.0363
lysosomal lumen (GO:0043202)	101	5	0.92	+	5.43	0.00276	0.0369
axonal growth cone (GO:0044295)	30	3	0.27	+	10.97	0.00324	0.0427
cell body membrane (GO:0044298)	30	3	0.27	+	10.97	0.00324	0.0429
pigment granule (GO:0048770)	106	5	0.97	+	5.18	0.00337	0.0438
melanosome (GO:0042470)	106	5	0.97	+	5.18	0.00337	0.0441
cytoplasmic side of plasma membrane (GO:0009898)	155	6	1.41	+	4.25	0.00348	0.0449
organelle subcompartment (GO:0031984)	392	10	3.57	+	2.8	0.00368	0.0472
dendrite cytoplasm (GO:0032839)	32	3	0.29	+	10.29	0.00384	0.0489
synaptic membrane (GO:0097060)	396	10	3.61	+	2.77	0.00394	0.05

## Sheet: 179 I-N genes_BP_SpC-9dpi
179 common genes_Immune-Nervous-Systems_Spinal cord-9dpi
GO biological process complete	Number of genes - REFLIST (20851)	Number of genes - Analyzed (94)	Expected	Over/under-represented	Fold Enrichment	raw P-value	FDR
nervous system development (GO:0007399)	2373	179	21.62	+	8.37	1.34e-154	2.14e-150
immune system process (GO:0002376)	2807	179	25.58	+	7.08	6.21e-142	4.95e-138
neurogenesis (GO:0022008)	1664	150	15.16	+	9.89	5e-123	2.65e-119
system development (GO:0048731)	4439	183	40.45	+	4.52	6.01e-111	2.39e-107
generation of neurons (GO:0048699)	1562	136	14.23	+	9.56	2.3e-105	7.32e-102
multicellular organism development (GO:0007275)	5064	183	46.14	+	3.97	8.56e-101	2.27e-97
cell differentiation (GO:0030154)	3729	169	33.98	+	4.97	6.4e-100	1.46e-96
cellular developmental process (GO:0048869)	3822	170	34.83	+	4.88	9.68e-100	1.93e-96
anatomical structure development (GO:0048856)	5451	184	49.67	+	3.7	5.66e-97	1e-93
developmental process (GO:0032502)	5901	184	53.77	+	3.42	8.2e-91	1.31e-87
regulation of developmental process (GO:0050793)	2624	136	23.91	+	5.69	4.81e-77	6.97e-74
multicellular organismal process (GO:0032501)	7014	183	63.91	+	2.86	1.07e-75	1.43e-72
regulation of cell differentiation (GO:0045595)	1841	118	16.78	+	7.03	3.88e-73	4.75e-70
regulation of multicellular organismal development (GO:2000026)	2065	122	18.82	+	6.48	1.8e-72	2.05e-69
regulation of multicellular organismal process (GO:0051239)	3183	141	29	+	4.86	2.13e-72	2.26e-69
hematopoietic or lymphoid organ development (GO:0048534)	621	83	5.66	+	14.67	2.16e-71	2.15e-68
immune system development (GO:0002520)	658	83	6	+	13.84	1.63e-69	1.52e-66
regulation of immune system process (GO:0002682)	1681	110	15.32	+	7.18	9.7e-68	8.59e-65
animal organ development (GO:0048513)	3212	137	29.27	+	4.68	2.9e-67	2.43e-64
positive regulation of biological process (GO:0048518)	6252	171	56.97	+	3	1.19e-66	9.5e-64
positive regulation of cellular process (GO:0048522)	5516	164	50.26	+	3.26	2.49e-66	1.89e-63
hemopoiesis (GO:0030097)	571	77	5.2	+	14.8	5.85e-66	4.24e-63
positive regulation of developmental process (GO:0051094)	1390	100	12.67	+	7.9	6.61e-64	4.58e-61
regulation of cell development (GO:0060284)	960	88	8.75	+	10.06	3.06e-63	2.03e-60
positive regulation of multicellular organismal process (GO:0051240)	1771	108	16.14	+	6.69	3.27e-63	2.08e-60
regulation of neurogenesis (GO:0050767)	834	83	7.6	+	10.92	8e-62	4.9e-59
positive regulation of immune system process (GO:0002684)	1160	92	10.57	+	8.7	2.34e-61	1.38e-58
regulation of nervous system development (GO:0051960)	943	85	8.59	+	9.89	3.19e-60	1.82e-57
cell development (GO:0048468)	1623	102	14.79	+	6.9	4.57e-60	2.51e-57
regulation of cell population proliferation (GO:0042127)	1645	101	14.99	+	6.74	1.99e-58	1.06e-55
response to organic substance (GO:0010033)	3026	126	27.57	+	4.57	2.36e-58	1.22e-55
response to chemical (GO:0042221)	4496	144	40.97	+	3.51	2.46e-56	1.22e-53
central nervous system development (GO:0007417)	989	83	9.01	+	9.21	2.65e-56	1.28e-53
positive regulation of cell differentiation (GO:0045597)	990	82	9.02	+	9.09	4.1e-55	1.92e-52
cellular response to chemical stimulus (GO:0070887)	2937	121	26.76	+	4.52	1.25e-54	5.7e-52
positive regulation of metabolic process (GO:0009893)	3691	132	33.63	+	3.92	1.34e-54	5.93e-52
regulation of cell death (GO:0010941)	1698	98	15.47	+	6.33	5.72e-54	2.46e-51
anatomical structure morphogenesis (GO:0009653)	2177	107	19.84	+	5.39	1.62e-53	6.79e-51
cell activation (GO:0001775)	1062	82	9.68	+	8.47	7.06e-53	2.89e-50
negative regulation of cellular process (GO:0048523)	4795	144	43.69	+	3.3	9.81e-53	3.91e-50
positive regulation of cellular metabolic process (GO:0031325)	3383	125	30.83	+	4.05	6.17e-52	2.4e-49
positive regulation of response to stimulus (GO:0048584)	2477	110	22.57	+	4.87	3.66e-51	1.39e-48
positive regulation of macromolecule metabolic process (GO:0010604)	3394	124	30.93	+	4.01	8.34e-51	3.09e-48
regulation of programmed cell death (GO:0043067)	1573	92	14.33	+	6.42	1.77e-50	6.4e-48
regulation of response to stimulus (GO:0048583)	4334	136	39.49	+	3.44	2.78e-50	9.83e-48
negative regulation of biological process (GO:0048519)	5377	148	49	+	3.02	2.85e-50	9.88e-48
regulation of apoptotic process (GO:0042981)	1553	91	14.15	+	6.43	6.84e-50	2.32e-47
response to stimulus (GO:0050896)	8534	175	77.76	+	2.25	8.43e-50	2.8e-47
response to external stimulus (GO:0009605)	2449	108	22.32	+	4.84	1.15e-49	3.73e-47
leukocyte activation (GO:0045321)	915	75	8.34	+	9	1.49e-49	4.74e-47
positive regulation of nitrogen compound metabolic process (GO:0051173)	3219	120	29.33	+	4.09	2.07e-49	6.46e-47
cell surface receptor signaling pathway (GO:0007166)	2483	108	22.63	+	4.77	4.25e-49	1.3e-46
regulation of localization (GO:0032879)	2808	113	25.59	+	4.42	9.39e-49	2.82e-46
cellular response to organic substance (GO:0071310)	2400	105	21.87	+	4.8	1.42e-47	4.18e-45
neuron differentiation (GO:0030182)	1018	76	9.28	+	8.19	1.52e-47	4.39e-45
multi-organism process (GO:0051704)	2842	112	25.9	+	4.32	2.74e-47	7.8e-45
regulation of cell communication (GO:0010646)	3529	122	32.16	+	3.79	4.44e-47	1.24e-44
regulation of signaling (GO:0023051)	3570	122	32.53	+	3.75	1.51e-46	4.16e-44
negative regulation of multicellular organismal process (GO:0051241)	1210	79	11.03	+	7.16	1.39e-45	3.76e-43
regulation of molecular function (GO:0065009)	3053	113	27.82	+	4.06	3.54e-45	9.4e-43
positive regulation of cell population proliferation (GO:0008284)	926	71	8.44	+	8.41	8.24e-45	2.15e-42
regulation of cell migration (GO:0030334)	873	69	7.96	+	8.67	3.13e-44	8.04e-42
response to stress (GO:0006950)	3612	120	32.91	+	3.65	3.46e-44	8.74e-42
negative regulation of developmental process (GO:0051093)	959	71	8.74	+	8.12	7.45e-44	1.86e-41
positive regulation of cell communication (GO:0010647)	1853	91	16.89	+	5.39	9.31e-44	2.25e-41
positive regulation of cell development (GO:0010720)	563	59	5.13	+	11.5	9.22e-44	2.26e-41
regulation of biological quality (GO:0065008)	4106	126	37.41	+	3.37	1.16e-43	2.76e-41
positive regulation of signaling (GO:0023056)	1862	91	16.97	+	5.36	1.37e-43	3.2e-41
cellular response to stimulus (GO:0051716)	6782	155	61.8	+	2.51	1.47e-43	3.39e-41
immune response (GO:0006955)	1869	91	17.03	+	5.34	1.84e-43	4.19e-41
regulation of cell motility (GO:2000145)	938	70	8.55	+	8.19	2.18e-43	4.82e-41
regulation of cellular process (GO:0050794)	11071	185	100.88	+	1.83	2.15e-43	4.83e-41
response to oxygen-containing compound (GO:1901700)	1599	85	14.57	+	5.83	6.85e-43	1.49e-40
regulation of cellular component movement (GO:0051270)	1022	71	9.31	+	7.62	4.03e-42	8.67e-40
regulation of cell adhesion (GO:0030155)	701	62	6.39	+	9.71	4.54e-42	9.65e-40
leukocyte differentiation (GO:0002521)	343	49	3.13	+	15.68	6.87e-42	1.44e-39
regulation of cellular component organization (GO:0051128)	2529	101	23.04	+	4.38	8.1e-42	1.68e-39
cell communication (GO:0007154)	5576	141	50.81	+	2.78	1.06e-41	2.17e-39
gliogenesis (GO:0042063)	225	43	2.05	+	20.97	1.92e-41	3.86e-39
regulation of locomotion (GO:0040012)	1010	70	9.2	+	7.61	2.11e-41	4.19e-39
regulation of anatomical structure morphogenesis (GO:0022603)	1098	72	10.01	+	7.2	3.45e-41	6.78e-39
positive regulation of neurogenesis (GO:0050769)	487	54	4.44	+	12.17	4.81e-41	9.35e-39
positive regulation of signal transduction (GO:0009967)	1702	85	15.51	+	5.48	6.94e-41	1.33e-38
positive regulation of cell migration (GO:0030335)	519	55	4.73	+	11.63	7.05e-41	1.34e-38
positive regulation of nervous system development (GO:0051962)	554	56	5.05	+	11.09	1.23e-40	2.27e-38
positive regulation of molecular function (GO:0044093)	1817	87	16.56	+	5.25	1.22e-40	2.28e-38
positive regulation of cellular component movement (GO:0051272)	561	56	5.11	+	10.95	2.29e-40	4.19e-38
neuron development (GO:0048666)	824	64	7.51	+	8.52	2.5e-40	4.52e-38
regulation of biological process (GO:0050789)	11770	186	107.25	+	1.73	2.62e-40	4.7e-38
positive regulation of cell motility (GO:2000147)	545	55	4.97	+	11.07	7.67e-40	1.36e-37
signal transduction (GO:0007165)	5135	134	46.79	+	2.86	7.88e-40	1.38e-37
regulation of signal transduction (GO:0009966)	3142	108	28.63	+	3.77	1.5e-39	2.6e-37
negative regulation of cell differentiation (GO:0045596)	711	60	6.48	+	9.26	1.54e-39	2.62e-37
positive regulation of protein metabolic process (GO:0051247)	1724	84	15.71	+	5.35	1.53e-39	2.62e-37
regulation of protein metabolic process (GO:0051246)	2832	103	25.81	+	3.99	2.72e-39	4.56e-37
response to biotic stimulus (GO:0009607)	1356	76	12.36	+	6.15	3.24e-39	5.37e-37
signaling (GO:0023052)	5473	137	49.87	+	2.75	3.42e-39	5.62e-37
regulation of immune response (GO:0050776)	1144	71	10.42	+	6.81	4.56e-39	7.41e-37
regulation of cellular metabolic process (GO:0031323)	6263	145	57.07	+	2.54	5.31e-39	8.55e-37
response to other organism (GO:0051707)	1330	75	12.12	+	6.19	8.31e-39	1.32e-36
response to external biotic stimulus (GO:0043207)	1332	75	12.14	+	6.18	9.17e-39	1.45e-36
positive regulation of locomotion (GO:0040017)	576	55	5.25	+	10.48	1.14e-38	1.78e-36
regulation of response to external stimulus (GO:0032101)	1097	69	10	+	6.9	3.34e-38	5.17e-36
positive regulation of cell adhesion (GO:0045785)	419	49	3.82	+	12.83	4.13e-38	6.32e-36
inflammatory response (GO:0006954)	502	52	4.57	+	11.37	4.26e-38	6.47e-36
response to endogenous stimulus (GO:0009719)	1507	78	13.73	+	5.68	4.75e-38	7.14e-36
regulation of metabolic process (GO:0019222)	6733	148	61.35	+	2.41	1.21e-37	1.79e-35
defense response (GO:0006952)	1352	74	12.32	+	6.01	2.16e-37	3.18e-35
tube development (GO:0035295)	861	62	7.85	+	7.9	3.52e-37	5.14e-35
positive regulation of intracellular signal transduction (GO:1902533)	1031	66	9.39	+	7.03	7.99e-37	1.16e-34
response to cytokine (GO:0034097)	1122	68	10.22	+	6.65	1.23e-36	1.76e-34
regulation of primary metabolic process (GO:0080090)	6055	140	55.17	+	2.54	1.49e-36	2.12e-34
regulation of neuron differentiation (GO:0045664)	670	56	6.11	+	9.17	1.52e-36	2.14e-34
regulation of nitrogen compound metabolic process (GO:0051171)	5870	138	53.49	+	2.58	1.74e-36	2.43e-34
negative regulation of cell death (GO:0060548)	1006	65	9.17	+	7.09	1.91e-36	2.65e-34
regulation of phosphorylation (GO:0042325)	1623	78	14.79	+	5.27	6.92e-36	9.51e-34
positive regulation of cellular component organization (GO:0051130)	1244	70	11.34	+	6.18	7.23e-36	9.84e-34
biological regulation (GO:0065007)	12470	186	113.63	+	1.64	8.32e-36	1.12e-33
regulation of cellular protein metabolic process (GO:0032268)	2661	96	24.25	+	3.96	1.24e-35	1.66e-33
positive regulation of phosphorylation (GO:0042327)	1088	66	9.91	+	6.66	1.76e-35	2.34e-33
positive regulation of transport (GO:0051050)	1010	64	9.2	+	6.95	2.3e-35	3.03e-33
regulation of phosphate metabolic process (GO:0019220)	1818	81	16.57	+	4.89	3.33e-35	4.35e-33
regulation of phosphorus metabolic process (GO:0051174)	1819	81	16.58	+	4.89	3.46e-35	4.48e-33
positive regulation of cellular protein metabolic process (GO:0032270)	1616	77	14.73	+	5.23	4.1e-35	5.27e-33
head development (GO:0060322)	793	58	7.23	+	8.03	5.75e-35	7.33e-33
positive regulation of phosphate metabolic process (GO:0045937)	1158	67	10.55	+	6.35	7.11e-35	8.92e-33
positive regulation of phosphorus metabolic process (GO:0010562)	1158	67	10.55	+	6.35	7.11e-35	9e-33
negative regulation of cell population proliferation (GO:0008285)	690	55	6.29	+	8.75	7.35e-35	9.15e-33
regulation of macromolecule metabolic process (GO:0060255)	6183	139	56.34	+	2.47	1.13e-34	1.39e-32
positive regulation of gene expression (GO:0010628)	2029	84	18.49	+	4.54	1.86e-34	2.27e-32
brain development (GO:0007420)	748	56	6.82	+	8.22	3.45e-34	4.2e-32
negative regulation of apoptotic process (GO:0043066)	900	60	8.2	+	7.32	3.86e-34	4.66e-32
regulation of hemopoiesis (GO:1903706)	460	47	4.19	+	11.21	4.52e-34	5.41e-32
regulation of intracellular signal transduction (GO:1902531)	1791	79	16.32	+	4.84	6.64e-34	7.9e-32
cellular response to oxygen-containing compound (GO:1901701)	1074	64	9.79	+	6.54	7e-34	8.26e-32
cellular component organization (GO:0016043)	5620	132	51.21	+	2.58	8.25e-34	9.66e-32
negative regulation of programmed cell death (GO:0043069)	916	60	8.35	+	7.19	9.7e-34	1.13e-31
locomotion (GO:0040011)	1305	69	11.89	+	5.8	1.08e-33	1.25e-31
tube morphogenesis (GO:0035239)	662	53	6.03	+	8.79	1.27e-33	1.46e-31
regulation of protein modification process (GO:0031399)	1873	80	17.07	+	4.69	1.87e-33	2.13e-31
regulation of transport (GO:0051049)	1887	80	17.19	+	4.65	3.1e-33	3.5e-31
regulation of protein phosphorylation (GO:0001932)	1454	71	13.25	+	5.36	1.12e-32	1.26e-30
positive regulation of biosynthetic process (GO:0009891)	2051	82	18.69	+	4.39	1.9e-32	2.12e-30
cellular component organization or biogenesis (GO:0071840)	5810	132	52.94	+	2.49	3.08e-32	3.41e-30
anatomical structure formation involved in morphogenesis (GO:0048646)	900	58	8.2	+	7.07	3.48e-32	3.82e-30
positive regulation of cellular biosynthetic process (GO:0031328)	2019	81	18.4	+	4.4	4.38e-32	4.78e-30
regulation of catalytic activity (GO:0050790)	2376	87	21.65	+	4.02	5.01e-32	5.43e-30
movement of cell or subcellular component (GO:0006928)	1544	72	14.07	+	5.12	5.75e-32	6.19e-30
regulation of cytokine production (GO:0001817)	724	53	6.6	+	8.03	8.14e-32	8.71e-30
positive regulation of catalytic activity (GO:0043085)	1466	70	13.36	+	5.24	1.39e-31	1.47e-29
positive regulation of response to external stimulus (GO:0032103)	594	49	5.41	+	9.05	1.51e-31	1.58e-29
positive regulation of immune response (GO:0050778)	847	56	7.72	+	7.26	1.5e-31	1.59e-29
positive regulation of protein phosphorylation (GO:0001934)	1013	60	9.23	+	6.5	1.82e-31	1.9e-29
positive regulation of cell death (GO:0010942)	712	52	6.49	+	8.01	3.83e-31	3.96e-29
response to lipid (GO:0033993)	866	56	7.89	+	7.1	4.42e-31	4.54e-29
cellular response to cytokine stimulus (GO:0071345)	1031	60	9.39	+	6.39	4.53e-31	4.63e-29
circulatory system development (GO:0072359)	874	56	7.96	+	7.03	6.9e-31	7e-29
positive regulation of protein modification process (GO:0031401)	1241	64	11.31	+	5.66	1.99e-30	2.01e-28
plasma membrane bounded cell projection organization (GO:0120036)	1114	61	10.15	+	6.01	3.06e-30	3.07e-28
cell projection organization (GO:0030030)	1159	62	10.56	+	5.87	3.08e-30	3.07e-28
cell migration (GO:0016477)	950	57	8.66	+	6.58	4.58e-30	4.53e-28
neuron projection development (GO:0031175)	679	50	6.19	+	8.08	4.69e-30	4.61e-28
homeostatic process (GO:0042592)	1661	72	15.14	+	4.76	4.87e-30	4.76e-28
cell morphogenesis (GO:0000902)	721	51	6.57	+	7.76	6.66e-30	6.47e-28
regulation of plasma membrane bounded cell projection organization (GO:0120035)	686	50	6.25	+	8	7.33e-30	7.08e-28
positive regulation of apoptotic process (GO:0043065)	655	49	5.97	+	8.21	9.99e-30	9.59e-28
response to organic cyclic compound (GO:0014070)	926	56	8.44	+	6.64	1.13e-29	1.08e-27
regulation of cell projection organization (GO:0031344)	695	50	6.33	+	7.9	1.29e-29	1.23e-27
positive regulation of programmed cell death (GO:0043068)	660	49	6.01	+	8.15	1.38e-29	1.3e-27
lymphocyte activation (GO:0046649)	379	40	3.45	+	11.58	2.01e-29	1.89e-27
cell motility (GO:0048870)	1066	59	9.71	+	6.07	2.06e-29	1.9e-27
localization of cell (GO:0051674)	1066	59	9.71	+	6.07	2.06e-29	1.91e-27
myeloid cell differentiation (GO:0030099)	230	34	2.1	+	16.22	2.06e-29	1.92e-27
regulation of leukocyte differentiation (GO:1902105)	280	36	2.55	+	14.11	3.32e-29	3.04e-27
cellular component morphogenesis (GO:0032989)	825	53	7.52	+	7.05	3.34e-29	3.04e-27
immune effector process (GO:0002252)	1080	59	9.84	+	6	3.98e-29	3.61e-27
tissue development (GO:0009888)	1777	73	16.19	+	4.51	4.38e-29	3.94e-27
regulation of response to stress (GO:0080134)	1516	68	13.81	+	4.92	5.04e-29	4.51e-27
regulation of cell activation (GO:0050865)	646	48	5.89	+	8.15	5.6e-29	4.98e-27
regulation of peptide transport (GO:0090087)	759	51	6.92	+	7.37	6.49e-29	5.74e-27
leukocyte migration (GO:0050900)	372	39	3.39	+	11.51	1.39e-28	1.22e-26
positive regulation of macromolecule biosynthetic process (GO:0010557)	1928	75	17.57	+	4.27	1.62e-28	1.42e-26
regulation of leukocyte activation (GO:0002694)	606	46	5.52	+	8.33	4.11e-28	3.58e-26
regulation of cell-cell adhesion (GO:0022407)	414	40	3.77	+	10.6	4.53e-28	3.92e-26
defense response to other organism (GO:0098542)	962	55	8.77	+	6.27	5.82e-28	5.01e-26
regulation of protein localization (GO:0032880)	1050	57	9.57	+	5.96	6.09e-28	5.22e-26
lymphocyte differentiation (GO:0030098)	237	33	2.16	+	15.28	8.4e-28	7.15e-26
glial cell differentiation (GO:0010001)	174	30	1.59	+	18.92	9.11e-28	7.72e-26
animal organ morphogenesis (GO:0009887)	974	55	8.88	+	6.2	1.04e-27	8.79e-26
cell activation involved in immune response (GO:0002263)	622	46	5.67	+	8.12	1.17e-27	9.8e-26
regulation of neuron death (GO:1901214)	319	36	2.91	+	12.38	2.09e-27	1.74e-25
cellular response to endogenous stimulus (GO:0071495)	1225	60	11.16	+	5.38	3.08e-27	2.56e-25
positive regulation of nucleobase-containing compound metabolic process (GO:0045935)	1909	73	17.4	+	4.2	3.34e-27	2.75e-25
homeostasis of number of cells (GO:0048872)	205	31	1.87	+	16.6	4.01e-27	3.3e-25
negative regulation of cellular metabolic process (GO:0031324)	2603	84	23.72	+	3.54	6.2e-27	5.07e-25
regulation of protein transport (GO:0051223)	727	48	6.62	+	7.25	7.68e-27	6.24e-25
regulation of neuron projection development (GO:0010975)	513	42	4.67	+	8.98	7.81e-27	6.32e-25
regulation of leukocyte cell-cell adhesion (GO:1903037)	307	35	2.8	+	12.51	8.69e-27	6.99e-25
leukocyte activation involved in immune response (GO:0002366)	618	45	5.63	+	7.99	8.82e-27	7.06e-25
regulation of defense response (GO:0031347)	769	49	7.01	+	6.99	9.15e-27	7.29e-25
apoptotic process (GO:0006915)	907	52	8.26	+	6.29	2.03e-26	1.61e-24
regulation of biosynthetic process (GO:0009889)	4291	106	39.1	+	2.71	4.06e-26	3.2e-24
regulation of cellular biosynthetic process (GO:0031326)	4212	105	38.38	+	2.74	4.17e-26	3.28e-24
negative regulation of metabolic process (GO:0009892)	2959	88	26.96	+	3.26	5.53e-26	4.32e-24
regulation of leukocyte migration (GO:0002685)	205	30	1.87	+	16.06	6.87e-26	5.34e-24
astrocyte differentiation (GO:0048708)	55	21	0.5	+	41.9	7.16e-26	5.53e-24
taxis (GO:0042330)	547	42	4.98	+	8.43	8.2e-26	6.31e-24
regulation of establishment of protein localization (GO:0070201)	774	48	7.05	+	6.81	1.02e-25	7.84e-24
positive regulation of cytokine production (GO:0001819)	458	39	4.17	+	9.34	1.72e-25	1.31e-23
response to molecule of bacterial origin (GO:0002237)	340	35	3.1	+	11.3	2.02e-25	1.53e-23
positive regulation of gliogenesis (GO:0014015)	73	22	0.67	+	33.07	3.55e-25	2.68e-23
positive regulation of cell-cell adhesion (GO:0022409)	268	32	2.44	+	13.1	4.33e-25	3.26e-23
positive regulation of transcription, DNA-templated (GO:0045893)	1561	64	14.22	+	4.5	4.47e-25	3.34e-23
response to drug (GO:0042493)	1018	53	9.28	+	5.71	4.61e-25	3.43e-23
regulation of gliogenesis (GO:0014013)	120	25	1.09	+	22.86	4.73e-25	3.51e-23
response to lipopolysaccharide (GO:0032496)	324	34	2.95	+	11.52	5.94e-25	4.38e-23
chemotaxis (GO:0006935)	545	41	4.97	+	8.26	7.06e-25	5.19e-23
negative regulation of nitrogen compound metabolic process (GO:0051172)	2403	78	21.9	+	3.56	7.91e-25	5.78e-23
embryonic morphogenesis (GO:0048598)	583	42	5.31	+	7.91	8.38e-25	6.1e-23
programmed cell death (GO:0012501)	1038	53	9.46	+	5.6	1.1e-24	7.93e-23
regulation of cellular localization (GO:0060341)	820	48	7.47	+	6.42	1.1e-24	7.95e-23
cellular process (GO:0009987)	14616	187	133.18	+	1.4	1.15e-24	8.28e-23
response to nitrogen compound (GO:1901698)	1091	54	9.94	+	5.43	1.47e-24	1.05e-22
regulation of gene expression (GO:0010468)	4483	106	40.85	+	2.59	1.52e-24	1.08e-22
regulation of lymphocyte activation (GO:0051249)	523	40	4.77	+	8.39	1.62e-24	1.15e-22
negative regulation of immune system process (GO:0002683)	458	38	4.17	+	9.11	1.83e-24	1.29e-22
embryo development (GO:0009790)	1007	52	9.18	+	5.67	2.06e-24	1.44e-22
regulation of epithelial cell proliferation (GO:0050678)	338	34	3.08	+	11.04	2.1e-24	1.47e-22
response to organonitrogen compound (GO:0010243)	1008	52	9.19	+	5.66	2.15e-24	1.5e-22
positive regulation of hemopoiesis (GO:1903708)	192	28	1.75	+	16	3.61e-24	2.5e-22
regulation of neuron apoptotic process (GO:0043523)	216	29	1.97	+	14.73	4.31e-24	2.97e-22
cell death (GO:0008219)	1073	53	9.78	+	5.42	4.83e-24	3.31e-22
localization (GO:0051179)	5768	120	52.56	+	2.28	5.75e-24	3.93e-22
myeloid leukocyte activation (GO:0002274)	580	41	5.29	+	7.76	6.45e-24	4.39e-22
negative regulation of macromolecule metabolic process (GO:0010605)	2698	81	24.58	+	3.29	9.11e-24	6.17e-22
positive regulation of leukocyte migration (GO:0002687)	138	25	1.26	+	19.88	9.94e-24	6.71e-22
positive regulation of nucleic acid-templated transcription (GO:1903508)	1657	64	15.1	+	4.24	1.02e-23	6.88e-22
positive regulation of RNA biosynthetic process (GO:1902680)	1658	64	15.11	+	4.24	1.06e-23	7.07e-22
positive regulation of leukocyte cell-cell adhesion (GO:1903039)	224	29	2.04	+	14.21	1.09e-23	7.28e-22
gland development (GO:0048732)	419	36	3.82	+	9.43	1.16e-23	7.71e-22
vasculature development (GO:0001944)	521	39	4.75	+	8.21	1.37e-23	9.08e-22
positive regulation of cell activation (GO:0050867)	423	36	3.85	+	9.34	1.57e-23	1.03e-21
heart development (GO:0007507)	528	39	4.81	+	8.11	2.16e-23	1.41e-21
response to abiotic stimulus (GO:0009628)	1161	54	10.58	+	5.1	2.44e-23	1.59e-21
cardiovascular system development (GO:0072358)	531	39	4.84	+	8.06	2.61e-23	1.7e-21
positive regulation of RNA metabolic process (GO:0051254)	1745	65	15.9	+	4.09	2.72e-23	1.76e-21
regulation of myeloid cell differentiation (GO:0045637)	233	29	2.12	+	13.66	2.98e-23	1.92e-21
blood vessel development (GO:0001568)	499	38	4.55	+	8.36	3.12e-23	2.01e-21
intracellular signal transduction (GO:0035556)	1698	64	15.47	+	4.14	3.65e-23	2.33e-21
glial cell development (GO:0021782)	110	23	1	+	22.95	3.77e-23	2.4e-21
positive regulation of protein transport (GO:0051222)	436	36	3.97	+	9.06	4.05e-23	2.57e-21
positive regulation of kinase activity (GO:0033674)	614	41	5.59	+	7.33	4.84e-23	3.06e-21
cytokine-mediated signaling pathway (GO:0019221)	694	43	6.32	+	6.8	5.65e-23	3.54e-21
regulation of multi-organism process (GO:0043900)	775	45	7.06	+	6.37	5.65e-23	3.56e-21
positive regulation of leukocyte activation (GO:0002696)	409	35	3.73	+	9.39	5.86e-23	3.66e-21
blood vessel morphogenesis (GO:0048514)	412	35	3.75	+	9.32	7.32e-23	4.55e-21
regulation of chemotaxis (GO:0050920)	217	28	1.98	+	14.16	7.36e-23	4.56e-21
regulation of cell cycle (GO:0051726)	1243	55	11.33	+	4.86	8.33e-23	5.14e-21
response to bacterium (GO:0009617)	704	43	6.42	+	6.7	9.56e-23	5.88e-21
cell morphogenesis involved in differentiation (GO:0000904)	562	39	5.12	+	7.62	1.77e-22	1.08e-20
cellular response to biotic stimulus (GO:0071216)	225	28	2.05	+	13.66	1.8e-22	1.1e-20
astrocyte development (GO:0014002)	37	17	0.34	+	50.42	3e-22	1.82e-20
regulation of MAPK cascade (GO:0043408)	729	43	6.64	+	6.47	3.44e-22	2.08e-20
positive regulation of transferase activity (GO:0051347)	691	42	6.3	+	6.67	3.89e-22	2.35e-20
regulation of macromolecule biosynthetic process (GO:0010556)	4068	97	37.07	+	2.62	4.79e-22	2.88e-20
negative regulation of macromolecule biosynthetic process (GO:0010558)	1506	59	13.72	+	4.3	5.19e-22	3.11e-20
positive regulation of establishment of protein localization (GO:1904951)	474	36	4.32	+	8.33	5.53e-22	3.3e-20
negative regulation of cellular biosynthetic process (GO:0031327)	1565	60	14.26	+	4.21	5.9e-22	3.51e-20
regulation of secretion (GO:0051046)	826	45	7.53	+	5.98	6.42e-22	3.8e-20
response to hormone (GO:0009725)	918	47	8.37	+	5.62	7.61e-22	4.49e-20
regulation of ERK1 and ERK2 cascade (GO:0070372)	292	30	2.66	+	11.27	7.81e-22	4.59e-20
myeloid cell homeostasis (GO:0002262)	111	22	1.01	+	21.75	9.67e-22	5.66e-20
sensory organ development (GO:0007423)	555	38	5.06	+	7.51	1.03e-21	6e-20
regulation of response to biotic stimulus (GO:0002831)	520	37	4.74	+	7.81	1.11e-21	6.44e-20
cell part morphogenesis (GO:0032990)	520	37	4.74	+	7.81	1.11e-21	6.46e-20
negative regulation of cellular macromolecule biosynthetic process (GO:2000113)	1423	57	12.97	+	4.4	1.16e-21	6.7e-20
regulation of transcription by RNA polymerase II (GO:0006357)	2250	71	20.5	+	3.46	1.35e-21	7.75e-20
negative regulation of biosynthetic process (GO:0009890)	1593	60	14.52	+	4.13	1.39e-21	7.99e-20
regulation of nucleobase-containing compound metabolic process (GO:0019219)	4062	96	37.01	+	2.59	1.81e-21	1.03e-19
regulation of growth (GO:0040008)	683	41	6.22	+	6.59	2.03e-21	1.16e-19
cell projection morphogenesis (GO:0048858)	498	36	4.54	+	7.93	2.58e-21	1.46e-19
cellular response to molecule of bacterial origin (GO:0071219)	201	26	1.83	+	14.2	2.63e-21	1.49e-19
cell population proliferation (GO:0008283)	499	36	4.55	+	7.92	2.74e-21	1.54e-19
regulation of kinase activity (GO:0043549)	903	46	8.23	+	5.59	2.75e-21	1.54e-19
positive regulation of lymphocyte activation (GO:0051251)	367	32	3.34	+	9.57	2.96e-21	1.65e-19
regulation of cellular macromolecule biosynthetic process (GO:2000112)	3931	94	35.82	+	2.62	2.99e-21	1.67e-19
negative regulation of nervous system development (GO:0051961)	310	30	2.82	+	10.62	3.77e-21	2.09e-19
developmental process involved in reproduction (GO:0003006)	964	47	8.78	+	5.35	5.19e-21	2.87e-19
epithelium development (GO:0060429)	1115	50	10.16	+	4.92	6.94e-21	3.83e-19
negative regulation of response to stimulus (GO:0048585)	1648	60	15.02	+	4	7.17e-21	3.94e-19
negative regulation of hemopoiesis (GO:1903707)	143	23	1.3	+	17.65	7.31e-21	4e-19
reproductive process (GO:0022414)	1433	56	13.06	+	4.29	9e-21	4.91e-19
negative regulation of RNA metabolic process (GO:0051253)	1381	55	12.58	+	4.37	9.54e-21	5.19e-19
positive regulation of neuron differentiation (GO:0045666)	383	32	3.49	+	9.17	9.73e-21	5.27e-19
reproduction (GO:0000003)	1436	56	13.09	+	4.28	9.9e-21	5.34e-19
regulation of T cell activation (GO:0050863)	323	30	2.94	+	10.19	1.11e-20	5.96e-19
negative regulation of transcription, DNA-templated (GO:0045892)	1230	52	11.21	+	4.64	1.17e-20	6.27e-19
neuron projection morphogenesis (GO:0048812)	490	35	4.47	+	7.84	1.42e-20	7.57e-19
regulation of angiogenesis (GO:0045765)	297	29	2.71	+	10.72	1.45e-20	7.7e-19
regulation of transcription, DNA-templated (GO:0006355)	3478	87	31.69	+	2.75	1.52e-20	8.05e-19
cellular response to lipid (GO:0071396)	528	36	4.81	+	7.48	1.58e-20	8.37e-19
regulation of secretion by cell (GO:1903530)	768	42	7	+	6	1.67e-20	8.83e-19
regulation of vasculature development (GO:1901342)	329	30	3	+	10.01	1.79e-20	9.43e-19
plasma membrane bounded cell projection morphogenesis (GO:0120039)	494	35	4.5	+	7.78	1.81e-20	9.48e-19
positive regulation of leukocyte differentiation (GO:1902107)	151	23	1.38	+	16.72	2.19e-20	1.14e-18
glial cell activation (GO:0061900)	39	16	0.36	+	45.02	2.25e-20	1.17e-18
positive regulation of cell projection organization (GO:0031346)	395	32	3.6	+	8.89	2.3e-20	1.19e-18
cellular response to stress (GO:0033554)	1751	61	15.96	+	3.82	2.58e-20	1.33e-18
positive regulation of MAPK cascade (GO:0043410)	543	36	4.95	+	7.28	3.76e-20	1.94e-18
negative regulation of gene expression (GO:0010629)	1766	61	16.09	+	3.79	3.9e-20	2e-18
regulation of transferase activity (GO:0051338)	1017	47	9.27	+	5.07	4.18e-20	2.14e-18
regulation of peptide secretion (GO:0002791)	509	35	4.64	+	7.55	4.45e-20	2.27e-18
regulation of nucleic acid-templated transcription (GO:1903506)	3544	87	32.29	+	2.69	5.2e-20	2.64e-18
positive regulation of transcription by RNA polymerase II (GO:0045944)	1223	51	11.14	+	4.58	5.34e-20	2.71e-18
regulation of RNA biosynthetic process (GO:2001141)	3549	87	32.34	+	2.69	5.7e-20	2.88e-18
negative regulation of transcription by RNA polymerase II (GO:0000122)	885	44	8.06	+	5.46	5.84e-20	2.94e-18
neuroinflammatory response (GO:0150076)	42	16	0.38	+	41.81	5.91e-20	2.97e-18
positive regulation of T cell activation (GO:0050870)	206	25	1.88	+	13.32	6.54e-20	3.27e-18
negative regulation of nucleic acid-templated transcription (GO:1903507)	1284	52	11.7	+	4.44	7.2e-20	3.59e-18
negative regulation of RNA biosynthetic process (GO:1902679)	1286	52	11.72	+	4.44	7.69e-20	3.83e-18
negative regulation of neurogenesis (GO:0050768)	289	28	2.63	+	10.63	8.46e-20	4.2e-18
regulation of hydrolase activity (GO:0051336)	1290	52	11.75	+	4.42	8.76e-20	4.33e-18
regulation of RNA metabolic process (GO:0051252)	3808	90	34.7	+	2.59	9.2e-20	4.54e-18
positive regulation of chemotaxis (GO:0050921)	141	22	1.28	+	17.12	9.61e-20	4.72e-18
regulation of myeloid leukocyte differentiation (GO:0002761)	122	21	1.11	+	18.89	1.12e-19	5.5e-18
chordate embryonic development (GO:0043009)	644	38	5.87	+	6.48	1.29e-19	6.29e-18
innate immune response (GO:0045087)	774	41	7.05	+	5.81	1.55e-19	7.54e-18
positive regulation of defense response (GO:0031349)	460	33	4.19	+	7.87	1.77e-19	8.6e-18
cellular response to lipopolysaccharide (GO:0071222)	192	24	1.75	+	13.72	2.02e-19	9.77e-18
negative regulation of nucleobase-containing compound metabolic process (GO:0045934)	1484	55	13.52	+	4.07	2.3e-19	1.11e-17
negative regulation of cell development (GO:0010721)	332	29	3.03	+	9.59	2.43e-19	1.17e-17
response to wounding (GO:0009611)	578	36	5.27	+	6.84	2.57e-19	1.23e-17
activation of immune response (GO:0002253)	619	37	5.64	+	6.56	2.77e-19	1.33e-17
forebrain development (GO:0030900)	399	31	3.64	+	8.53	2.93e-19	1.4e-17
embryo development ending in birth or egg hatching (GO:0009792)	661	38	6.02	+	6.31	2.97e-19	1.41e-17
regulation of epithelial cell migration (GO:0010632)	223	25	2.03	+	12.3	3.73e-19	1.77e-17
morphogenesis of an epithelium (GO:0002009)	438	32	3.99	+	8.02	4.02e-19	1.9e-17
epithelial tube morphogenesis (GO:0060562)	311	28	2.83	+	9.88	5.09e-19	2.4e-17
cell morphogenesis involved in neuron differentiation (GO:0048667)	442	32	4.03	+	7.95	5.16e-19	2.42e-17
embryonic organ development (GO:0048568)	443	32	4.04	+	7.93	5.49e-19	2.57e-17
response to peptide (GO:1901652)	480	33	4.37	+	7.54	5.92e-19	2.77e-17
regulation of cellular protein localization (GO:1903827)	556	35	5.07	+	6.91	6.28e-19	2.92e-17
regulation of innate immune response (GO:0045088)	446	32	4.06	+	7.87	6.61e-19	3.07e-17
tissue morphogenesis (GO:0048729)	564	35	5.14	+	6.81	9.61e-19	4.45e-17
cellular response to organonitrogen compound (GO:0071417)	605	36	5.51	+	6.53	1.04e-18	4.78e-17
negative regulation of cell communication (GO:0010648)	1371	52	12.49	+	4.16	1.12e-18	5.16e-17
regulation of reactive oxygen species metabolic process (GO:2000377)	184	23	1.68	+	13.72	1.19e-18	5.45e-17
negative regulation of signaling (GO:0023057)	1375	52	12.53	+	4.15	1.26e-18	5.79e-17
regulation of leukocyte chemotaxis (GO:0002688)	119	20	1.08	+	18.44	1.31e-18	5.99e-17
response to growth factor (GO:0070848)	532	34	4.85	+	7.01	1.37e-18	6.22e-17
positive regulation of neuron projection development (GO:0010976)	294	27	2.68	+	10.08	1.43e-18	6.48e-17
regulation of organelle organization (GO:0033043)	1328	51	12.1	+	4.21	1.59e-18	7.19e-17
negative regulation of protein metabolic process (GO:0051248)	1119	47	10.2	+	4.61	1.65e-18	7.46e-17
microglial cell activation (GO:0001774)	31	14	0.28	+	49.56	1.93e-18	8.65e-17
leukocyte activation involved in inflammatory response (GO:0002269)	31	14	0.28	+	49.56	1.93e-18	8.68e-17
reproductive structure development (GO:0048608)	429	31	3.91	+	7.93	2.04e-18	9.14e-17
cellular response to nitrogen compound (GO:1901699)	662	37	6.03	+	6.13	2.26e-18	1.01e-16
reproductive system development (GO:0061458)	433	31	3.95	+	7.86	2.62e-18	1.16e-16
regulation of DNA-binding transcription factor activity (GO:0051090)	434	31	3.95	+	7.84	2.78e-18	1.23e-16
positive regulation of cellular protein localization (GO:1903829)	335	28	3.05	+	9.17	3.11e-18	1.38e-16
vesicle-mediated transport (GO:0016192)	1938	61	17.66	+	3.45	3.3e-18	1.46e-16
regulation of protein secretion (GO:0050708)	479	32	4.36	+	7.33	4.7e-18	2.07e-16
enzyme linked receptor protein signaling pathway (GO:0007167)	722	38	6.58	+	5.78	4.98e-18	2.19e-16
response to toxic substance (GO:0009636)	523	33	4.77	+	6.92	6.66e-18	2.92e-16
biological adhesion (GO:0022610)	927	42	8.45	+	4.97	1.19e-17	5.21e-16
cellular response to growth factor stimulus (GO:0071363)	502	32	4.57	+	7	1.69e-17	7.36e-16
immune response-regulating signaling pathway (GO:0002764)	586	34	5.34	+	6.37	2.22e-17	9.61e-16
macrophage activation (GO:0042116)	51	15	0.46	+	32.28	2.22e-17	9.63e-16
positive regulation of reactive oxygen species metabolic process (GO:2000379)	100	18	0.91	+	19.75	2.52e-17	1.09e-15
secretion by cell (GO:0032940)	998	43	9.09	+	4.73	2.64e-17	1.14e-15
regulation of cell morphogenesis (GO:0022604)	512	32	4.67	+	6.86	2.89e-17	1.24e-15
positive regulation of intracellular transport (GO:0032388)	216	23	1.97	+	11.69	3.02e-17	1.29e-15
positive regulation of hydrolase activity (GO:0051345)	769	38	7.01	+	5.42	3.65e-17	1.56e-15
negative regulation of leukocyte differentiation (GO:1902106)	103	18	0.94	+	19.18	4e-17	1.7e-15
myeloid leukocyte differentiation (GO:0002573)	124	19	1.13	+	16.82	4.59e-17	1.95e-15
protein phosphorylation (GO:0006468)	965	42	8.79	+	4.78	4.73e-17	2e-15
positive regulation of angiogenesis (GO:0045766)	170	21	1.55	+	13.56	5.05e-17	2.13e-15
axon development (GO:0061564)	412	29	3.75	+	7.72	5.47e-17	2.31e-15
cell adhesion (GO:0007155)	921	41	8.39	+	4.89	5.64e-17	2.37e-15
B cell differentiation (GO:0030183)	108	18	0.98	+	18.29	8.43e-17	3.53e-15
positive regulation of protein kinase activity (GO:0045860)	537	32	4.89	+	6.54	1.05e-16	4.41e-15
export from cell (GO:0140352)	1042	43	9.49	+	4.53	1.19e-16	4.94e-15
positive regulation of leukocyte chemotaxis (GO:0002690)	92	17	0.84	+	20.28	1.35e-16	5.62e-15
negative regulation of cellular protein metabolic process (GO:0032269)	1050	43	9.57	+	4.49	1.54e-16	6.41e-15
interspecies interaction between organisms (GO:0044419)	853	39	7.77	+	5.02	1.59e-16	6.57e-15
T cell activation (GO:0042110)	235	23	2.14	+	10.74	1.65e-16	6.79e-15
regulation of immune effector process (GO:0002697)	468	30	4.26	+	7.03	1.65e-16	6.81e-15
visual system development (GO:0150063)	361	27	3.29	+	8.21	1.75e-16	7.18e-15
immune response-activating signal transduction (GO:0002757)	549	32	5	+	6.4	1.91e-16	7.84e-15
secretion (GO:0046903)	1114	44	10.15	+	4.33	2.28e-16	9.31e-15
myeloid leukocyte mediated immunity (GO:0002444)	513	31	4.67	+	6.63	2.32e-16	9.45e-15
sensory system development (GO:0048880)	366	27	3.34	+	8.1	2.41e-16	9.79e-15
regulation of cytokine secretion (GO:0050707)	212	22	1.93	+	11.39	2.52e-16	1.02e-14
positive regulation of intracellular protein transport (GO:0090316)	161	20	1.47	+	13.63	2.63e-16	1.06e-14
regulation of endothelial cell migration (GO:0010594)	161	20	1.47	+	13.63	2.63e-16	1.06e-14
negative regulation of neuron death (GO:1901215)	213	22	1.94	+	11.33	2.76e-16	1.11e-14
leukocyte chemotaxis (GO:0030595)	139	19	1.27	+	15	3.08e-16	1.23e-14
positive regulation of vasculature development (GO:1904018)	190	21	1.73	+	12.13	3.91e-16	1.56e-14
positive regulation of secretion (GO:0051047)	446	29	4.06	+	7.14	3.91e-16	1.56e-14
negative regulation of cytokine production (GO:0001818)	276	24	2.51	+	9.54	4.12e-16	1.64e-14
wound healing (GO:0042060)	485	30	4.42	+	6.79	4.11e-16	1.64e-14
regulation of ossification (GO:0030278)	193	21	1.76	+	11.94	5.22e-16	2.07e-14
regulation of inflammatory response (GO:0050727)	345	26	3.14	+	8.27	5.59e-16	2.21e-14
positive regulation of epithelial cell proliferation (GO:0050679)	194	21	1.77	+	11.88	5.74e-16	2.26e-14
regulation of protein kinase B signaling (GO:0051896)	225	22	2.05	+	10.73	7.91e-16	3.11e-14
response to inorganic substance (GO:0010035)	541	31	4.93	+	6.29	9.31e-16	3.65e-14
angiogenesis (GO:0001525)	320	25	2.92	+	8.57	9.78e-16	3.83e-14
negative regulation of signal transduction (GO:0009968)	1271	46	11.58	+	3.97	9.85e-16	3.84e-14
positive regulation of nucleocytoplasmic transport (GO:0046824)	69	15	0.63	+	23.86	1.06e-15	4.14e-14
astrocyte activation (GO:0048143)	19	11	0.17	+	63.53	1.14e-15	4.44e-14
cell chemotaxis (GO:0060326)	203	21	1.85	+	11.35	1.32e-15	5.12e-14
cellular response to external stimulus (GO:0071496)	360	26	3.28	+	7.93	1.45e-15	5.6e-14
developmental growth (GO:0048589)	396	27	3.61	+	7.48	1.49e-15	5.76e-14
B cell activation (GO:0042113)	153	19	1.39	+	13.63	1.52e-15	5.86e-14
regulation of intracellular transport (GO:0032386)	362	26	3.3	+	7.88	1.64e-15	6.29e-14
lymphocyte activation involved in immune response (GO:0002285)	109	17	0.99	+	17.12	1.68e-15	6.41e-14
myeloid cell activation involved in immune response (GO:0002275)	517	30	4.71	+	6.37	2.07e-15	7.92e-14
growth (GO:0040007)	402	27	3.66	+	7.37	2.11e-15	8.05e-14
cellular response to peptide (GO:1901653)	332	25	3.03	+	8.26	2.16e-15	8.22e-14
regulation of cellular response to stress (GO:0080135)	735	35	6.7	+	5.23	2.24e-15	8.49e-14
hindbrain development (GO:0030902)	157	19	1.43	+	13.28	2.34e-15	8.86e-14
positive regulation of nitric oxide biosynthetic process (GO:0045429)	43	13	0.39	+	33.18	2.36e-15	8.91e-14
symbiotic process (GO:0044403)	784	36	7.14	+	5.04	2.45e-15	9.24e-14
positive regulation of ERK1 and ERK2 cascade (GO:0070374)	210	21	1.91	+	10.97	2.46e-15	9.25e-14
response to extracellular stimulus (GO:0009991)	562	31	5.12	+	6.05	2.5e-15	9.39e-14
regulated exocytosis (GO:0045055)	695	34	6.33	+	5.37	2.8e-15	1.05e-13
regulation of cell-substrate adhesion (GO:0010810)	212	21	1.93	+	10.87	2.93e-15	1.09e-13
positive regulation of nitric oxide metabolic process (GO:1904407)	44	13	0.4	+	32.42	3.03e-15	1.13e-13
hematopoietic progenitor cell differentiation (GO:0002244)	94	16	0.86	+	18.68	3.43e-15	1.28e-13
cognition (GO:0050890)	306	24	2.79	+	8.61	3.52e-15	1.3e-13
regulation of developmental growth (GO:0048638)	340	25	3.1	+	8.07	3.61e-15	1.33e-13
regulation of protein kinase activity (GO:0045859)	795	36	7.24	+	4.97	3.69e-15	1.36e-13
regulation of nitric oxide biosynthetic process (GO:0045428)	60	14	0.55	+	25.61	4.2e-15	1.54e-13
axonogenesis (GO:0007409)	378	26	3.44	+	7.55	4.29e-15	1.58e-13
positive regulation of myeloid cell differentiation (GO:0045639)	96	16	0.87	+	18.29	4.61e-15	1.68e-13
neutrophil mediated immunity (GO:0002446)	493	29	4.49	+	6.46	4.58e-15	1.68e-13
heart morphogenesis (GO:0003007)	249	22	2.27	+	9.7	5.52e-15	2.01e-13
leukocyte mediated immunity (GO:0002443)	760	35	6.93	+	5.05	5.84e-15	2.12e-13
cell fate commitment (GO:0045165)	251	22	2.29	+	9.62	6.43e-15	2.33e-13
positive regulation of neuron death (GO:1901216)	99	16	0.9	+	17.74	7.09e-15	2.57e-13
positive regulation of multi-organism process (GO:0043902)	502	29	4.57	+	6.34	7.11e-15	2.57e-13
leukocyte degranulation (GO:0043299)	503	29	4.58	+	6.33	7.47e-15	2.69e-13
positive regulation of epithelial cell migration (GO:0010634)	144	18	1.31	+	13.72	7.88e-15	2.83e-13
myeloid leukocyte migration (GO:0097529)	121	17	1.1	+	15.42	7.93e-15	2.85e-13
regulation of cellular component biogenesis (GO:0044087)	968	39	8.82	+	4.42	8.56e-15	3.06e-13
positive regulation of protein kinase B signaling (GO:0051897)	170	19	1.55	+	12.27	8.8e-15	3.14e-13
cellular response to organic cyclic compound (GO:0071407)	548	30	4.99	+	6.01	8.96e-15	3.19e-13
regulation of lymphocyte differentiation (GO:0045619)	171	19	1.56	+	12.19	9.71e-15	3.45e-13
thymus development (GO:0048538)	49	13	0.45	+	29.12	9.9e-15	3.51e-13
positive regulation of organelle organization (GO:0010638)	637	32	5.8	+	5.51	1.01e-14	3.58e-13
positive regulation of cell-substrate adhesion (GO:0010811)	123	17	1.12	+	15.17	1.01e-14	3.59e-13
eye development (GO:0001654)	357	25	3.25	+	7.69	1.03e-14	3.62e-13
positive regulation of proteolysis (GO:0045862)	362	25	3.3	+	7.58	1.38e-14	4.86e-13
regulation of proteolysis (GO:0030162)	737	34	6.72	+	5.06	1.44e-14	5.04e-13
endocrine system development (GO:0035270)	126	17	1.15	+	14.81	1.45e-14	5.08e-13
transmembrane receptor protein tyrosine kinase signaling pathway (GO:0007169)	517	29	4.71	+	6.16	1.46e-14	5.08e-13
telencephalon development (GO:0021537)	264	22	2.41	+	9.15	1.69e-14	5.87e-13
tube formation (GO:0035148)	152	18	1.39	+	13	1.85e-14	6.41e-13
negative regulation of neuron apoptotic process (GO:0043524)	152	18	1.39	+	13	1.85e-14	6.43e-13
negative regulation of leukocyte activation (GO:0002695)	179	19	1.63	+	11.65	2.08e-14	7.19e-13
positive regulation of reactive oxygen species biosynthetic process (GO:1903428)	53	13	0.48	+	26.92	2.36e-14	8.16e-13
positive regulation of peptide secretion (GO:0002793)	303	23	2.76	+	8.33	2.63e-14	9.05e-13
leukocyte homeostasis (GO:0001776)	70	14	0.64	+	21.95	2.7e-14	9.29e-13
positive regulation of growth (GO:0045927)	271	22	2.47	+	8.91	2.77e-14	9.52e-13
positive regulation of protein serine/threonine kinase activity (GO:0071902)	341	24	3.11	+	7.72	3.29e-14	1.13e-12
regulation of reactive oxygen species biosynthetic process (GO:1903426)	90	15	0.82	+	18.29	3.39e-14	1.16e-12
positive regulation of secretion by cell (GO:1903532)	415	26	3.78	+	6.88	3.39e-14	1.16e-12
regulation of intracellular protein transport (GO:0033157)	243	21	2.21	+	9.48	3.55e-14	1.21e-12
granulocyte activation (GO:0036230)	499	28	4.55	+	6.16	4.3e-14	1.46e-12
chemical homeostasis (GO:0048878)	1128	41	10.28	+	3.99	4.33e-14	1.47e-12
regulation of phagocytosis (GO:0050764)	92	15	0.84	+	17.89	4.52e-14	1.53e-12
phosphorylation (GO:0016310)	1300	44	11.85	+	3.71	4.72e-14	1.59e-12
T cell differentiation (GO:0030217)	137	17	1.25	+	13.62	5.05e-14	1.7e-12
regulation of mononuclear cell proliferation (GO:0032944)	218	20	1.99	+	10.07	5.28e-14	1.77e-12
positive regulation of immune effector process (GO:0002699)	220	20	2	+	9.98	6.19e-14	2.07e-12
response to antibiotic (GO:0046677)	317	23	2.89	+	7.96	6.41e-14	2.15e-12
regulation of nucleocytoplasmic transport (GO:0046822)	116	16	1.06	+	15.14	6.52e-14	2.18e-12
regulation of interleukin-6 production (GO:0032675)	140	17	1.28	+	13.33	6.97e-14	2.32e-12
positive regulation of response to biotic stimulus (GO:0002833)	354	24	3.23	+	7.44	7.08e-14	2.35e-12
apoptotic signaling pathway (GO:0097190)	286	22	2.61	+	8.44	7.71e-14	2.56e-12
exocytosis (GO:0006887)	784	34	7.14	+	4.76	7.89e-14	2.61e-12
regulation of peptidyl-tyrosine phosphorylation (GO:0050730)	254	21	2.31	+	9.07	7.94e-14	2.63e-12
regulation of protein serine/threonine kinase activity (GO:0071900)	514	28	4.68	+	5.98	8.59e-14	2.83e-12
negative regulation of neuron differentiation (GO:0045665)	225	20	2.05	+	9.75	9.14e-14	3.01e-12
response to radiation (GO:0009314)	435	26	3.96	+	6.56	9.52e-14	3.13e-12
multi-organism reproductive process (GO:0044703)	997	38	9.08	+	4.18	1.07e-13	3.5e-12
cellular macromolecule metabolic process (GO:0044260)	5073	94	46.23	+	2.03	1.09e-13	3.56e-12
regulation of leukocyte proliferation (GO:0070663)	229	20	2.09	+	9.58	1.24e-13	4.05e-12
positive regulation of protein import (GO:1904591)	46	12	0.42	+	28.63	1.29e-13	4.19e-12
negative regulation of cell activation (GO:0050866)	200	19	1.82	+	10.43	1.31e-13	4.25e-12
neutrophil degranulation (GO:0043312)	482	27	4.39	+	6.15	1.33e-13	4.3e-12
immune response-regulating cell surface receptor signaling pathway (GO:0002768)	483	27	4.4	+	6.13	1.39e-13	4.5e-12
negative regulation of phosphate metabolic process (GO:0045936)	568	29	5.18	+	5.6	1.41e-13	4.55e-12
negative regulation of phosphorus metabolic process (GO:0010563)	569	29	5.18	+	5.59	1.47e-13	4.73e-12
neutrophil activation involved in immune response (GO:0002283)	486	27	4.43	+	6.1	1.6e-13	5.14e-12
biological_process (GO:0008150)	17780	190	162.02	+	1.17	1.61e-13	5.16e-12
Unclassified (UNCLASSIFIED)	3071	0	27.98	-	< 0.01	1.61e-13	5.17e-12
learning or memory (GO:0007611)	265	21	2.41	+	8.7	1.71e-13	5.47e-12
sensory organ morphogenesis (GO:0090596)	265	21	2.41	+	8.7	1.71e-13	5.48e-12
negative regulation of phosphorylation (GO:0042326)	449	26	4.09	+	6.35	1.9e-13	6.06e-12
regulation of tumor necrosis factor production (GO:0032680)	150	17	1.37	+	12.44	1.95e-13	6.19e-12
embryonic organ morphogenesis (GO:0048562)	303	22	2.76	+	7.97	2.3e-13	7.29e-12
neutrophil activation (GO:0042119)	495	27	4.51	+	5.99	2.42e-13	7.65e-12
negative regulation of myeloid cell differentiation (GO:0045638)	84	14	0.77	+	18.29	2.49e-13	7.86e-12
regulation of tumor necrosis factor superfamily cytokine production (GO:1903555)	153	17	1.39	+	12.19	2.61e-13	8.25e-12
stem cell differentiation (GO:0048863)	156	17	1.42	+	11.96	3.49e-13	1.1e-11
regulation of cytokine biosynthetic process (GO:0042035)	108	15	0.98	+	15.24	3.71e-13	1.17e-11
placenta development (GO:0001890)	157	17	1.43	+	11.88	3.84e-13	1.2e-11
regulation of vesicle-mediated transport (GO:0060627)	552	28	5.03	+	5.57	4.5e-13	1.41e-11
regulation of lymphocyte proliferation (GO:0050670)	216	19	1.97	+	9.65	4.66e-13	1.46e-11
positive regulation of protein secretion (GO:0050714)	281	21	2.56	+	8.2	4.95e-13	1.54e-11
aging (GO:0007568)	282	21	2.57	+	8.17	5.27e-13	1.64e-11
camera-type eye development (GO:0043010)	317	22	2.89	+	7.62	5.37e-13	1.66e-11
positive regulation of cell cycle (GO:0045787)	391	24	3.56	+	6.74	5.36e-13	1.66e-11
response to oxidative stress (GO:0006979)	391	24	3.56	+	6.74	5.36e-13	1.66e-11
multicellular organism reproduction (GO:0032504)	842	34	7.67	+	4.43	5.5e-13	1.7e-11
epithelial tube formation (GO:0072175)	136	16	1.24	+	12.91	6.06e-13	1.87e-11
erythrocyte homeostasis (GO:0034101)	91	14	0.83	+	16.88	6.62e-13	2.04e-11
ion homeostasis (GO:0050801)	798	33	7.27	+	4.54	6.79e-13	2.08e-11
positive regulation of peptidyl-tyrosine phosphorylation (GO:0050731)	192	18	1.75	+	10.29	7.28e-13	2.23e-11
cellular response to extracellular stimulus (GO:0031668)	288	21	2.62	+	8	7.71e-13	2.36e-11
transport (GO:0006810)	4535	86	41.32	+	2.08	7.73e-13	2.36e-11
regulation of macrophage migration (GO:1905521)	40	11	0.36	+	30.18	8.46e-13	2.58e-11
phagocytosis (GO:0006909)	325	22	2.96	+	7.43	8.58e-13	2.61e-11
regulation of transmembrane transport (GO:0034762)	570	28	5.19	+	5.39	9.42e-13	2.86e-11
cellular chemical homeostasis (GO:0055082)	759	32	6.92	+	4.63	9.7e-13	2.94e-11
positive regulation of leukocyte proliferation (GO:0070665)	141	16	1.28	+	12.45	1.01e-12	3.04e-11
negative regulation of cell cycle (GO:0045786)	575	28	5.24	+	5.34	1.15e-12	3.47e-11
regulation of T cell differentiation (GO:0045580)	143	16	1.3	+	12.28	1.22e-12	3.69e-11
immune response-activating cell surface receptor signaling pathway (GO:0002429)	448	25	4.08	+	6.12	1.25e-12	3.75e-11
positive regulation of innate immune response (GO:0045089)	332	22	3.03	+	7.27	1.28e-12	3.84e-11
negative regulation of protein phosphorylation (GO:0001933)	409	24	3.73	+	6.44	1.33e-12	3.98e-11
establishment of localization (GO:0051234)	4665	87	42.51	+	2.05	1.36e-12	4.06e-11
positive regulation of myeloid leukocyte differentiation (GO:0002763)	58	12	0.53	+	22.71	1.4e-12	4.16e-11
positive regulation of neuron apoptotic process (GO:0043525)	58	12	0.53	+	22.71	1.4e-12	4.17e-11
positive regulation of protein import into nucleus (GO:0042307)	43	11	0.39	+	28.07	1.66e-12	4.94e-11
positive regulation of DNA-binding transcription factor activity (GO:0051091)	267	20	2.43	+	8.22	1.76e-12	5.22e-11
multicellular organismal reproductive process (GO:0048609)	830	33	7.56	+	4.36	1.9e-12	5.63e-11
regulation of response to cytokine stimulus (GO:0060759)	175	17	1.59	+	10.66	1.92e-12	5.68e-11
regulation of production of molecular mediator of immune response (GO:0002700)	148	16	1.35	+	11.86	1.98e-12	5.84e-11
regulation of leukocyte mediated immunity (GO:0002703)	205	18	1.87	+	9.64	2.03e-12	5.97e-11
tissue remodeling (GO:0048771)	100	14	0.91	+	15.36	2.1e-12	6.18e-11
positive regulation of endothelial cell migration (GO:0010595)	101	14	0.92	+	15.21	2.37e-12	6.97e-11
behavior (GO:0007610)	594	28	5.41	+	5.17	2.42e-12	7.09e-11
regulation of cell growth (GO:0001558)	423	24	3.85	+	6.23	2.61e-12	7.64e-11
cellular homeostasis (GO:0019725)	895	34	8.16	+	4.17	2.83e-12	8.26e-11
erythrocyte differentiation (GO:0030218)	82	13	0.75	+	17.4	3.21e-12	9.35e-11
negative regulation of cell adhesion (GO:0007162)	278	20	2.53	+	7.9	3.51e-12	1.02e-10
negative regulation of protein modification process (GO:0031400)	604	28	5.5	+	5.09	3.54e-12	1.03e-10
regulation of cell morphogenesis involved in differentiation (GO:0010769)	314	21	2.86	+	7.34	3.63e-12	1.05e-10
viral process (GO:0016032)	701	30	6.39	+	4.7	3.8e-12	1.1e-10
regulation of ion transport (GO:0043269)	703	30	6.41	+	4.68	4.07e-12	1.17e-10
regulation of chemokine production (GO:0032642)	84	13	0.77	+	16.98	4.22e-12	1.22e-10
regulation of mononuclear cell migration (GO:0071675)	48	11	0.44	+	25.15	4.67e-12	1.34e-10
regulation of cellular response to growth factor stimulus (GO:0090287)	284	20	2.59	+	7.73	5.06e-12	1.45e-10
positive regulation of ion transport (GO:0043270)	284	20	2.59	+	7.73	5.06e-12	1.45e-10
positive regulation of phagocytosis (GO:0050766)	66	12	0.6	+	19.95	5.35e-12	1.53e-10
cation homeostasis (GO:0055080)	714	30	6.51	+	4.61	5.9e-12	1.68e-10
regulation of metal ion transport (GO:0010959)	400	23	3.64	+	6.31	5.97e-12	1.7e-10
regulation of protein import (GO:1904589)	67	12	0.61	+	19.66	6.26e-12	1.78e-10
response to nutrient levels (GO:0031667)	530	26	4.83	+	5.38	6.8e-12	1.93e-10
lipopolysaccharide-mediated signaling pathway (GO:0031663)	35	10	0.32	+	31.35	6.89e-12	1.95e-10
positive regulation of mononuclear cell proliferation (GO:0032946)	135	15	1.23	+	12.19	6.95e-12	1.97e-10
regulation of glial cell differentiation (GO:0045685)	68	12	0.62	+	19.37	7.31e-12	2.06e-10
macromolecule metabolic process (GO:0043170)	6181	102	56.32	+	1.81	7.52e-12	2.12e-10
positive regulation of macrophage migration (GO:1905523)	23	9	0.21	+	42.94	7.74e-12	2.18e-10
regulation of apoptotic signaling pathway (GO:2001233)	407	23	3.71	+	6.2	8.34e-12	2.34e-10
inorganic ion homeostasis (GO:0098771)	726	30	6.62	+	4.53	8.79e-12	2.46e-10
cellular response to drug (GO:0035690)	409	23	3.73	+	6.17	9.16e-12	2.56e-10
positive regulation of inflammatory response (GO:0050729)	138	15	1.26	+	11.93	9.27e-12	2.59e-10
regulation of adaptive immune response (GO:0002819)	166	16	1.51	+	10.58	9.83e-12	2.74e-10
neural tube development (GO:0021915)	166	16	1.51	+	10.58	9.83e-12	2.74e-10
positive regulation of cytokine biosynthetic process (GO:0042108)	70	12	0.64	+	18.81	9.9e-12	2.75e-10
modulation of chemical synaptic transmission (GO:0050804)	453	24	4.13	+	5.81	1.03e-11	2.85e-10
regulation of phospholipid metabolic process (GO:1903725)	91	13	0.83	+	15.68	1.05e-11	2.91e-10
regulation of trans-synaptic signaling (GO:0099177)	454	24	4.14	+	5.8	1.07e-11	2.97e-10
positive regulation of MAP kinase activity (GO:0043406)	262	19	2.39	+	7.96	1.1e-11	3.04e-10
axon guidance (GO:0007411)	264	19	2.41	+	7.9	1.25e-11	3.43e-10
regulation of peptidyl-serine phosphorylation (GO:0033135)	142	15	1.29	+	11.59	1.35e-11	3.71e-10
cardiac chamber development (GO:0003205)	170	16	1.55	+	10.33	1.37e-11	3.76e-10
negative regulation of molecular function (GO:0044092)	1177	38	10.73	+	3.54	1.38e-11	3.79e-10
positive regulation of cell growth (GO:0030307)	171	16	1.56	+	10.27	1.49e-11	4.07e-10
neuron projection guidance (GO:0097485)	267	19	2.43	+	7.81	1.5e-11	4.08e-10
regulation of MAP kinase activity (GO:0043405)	340	21	3.1	+	6.78	1.49e-11	4.08e-10
positive regulation of interleukin-6 production (GO:0032755)	94	13	0.86	+	15.18	1.52e-11	4.13e-10
cellular cation homeostasis (GO:0030003)	645	28	5.88	+	4.76	1.56e-11	4.24e-10
in utero embryonic development (GO:0001701)	382	22	3.48	+	6.32	1.73e-11	4.68e-10
positive regulation of cytokine secretion (GO:0050715)	146	15	1.33	+	11.27	1.94e-11	5.25e-10
cellular response to oxidative stress (GO:0034599)	238	18	2.17	+	8.3	2.06e-11	5.58e-10
positive regulation of transmembrane transport (GO:0034764)	206	17	1.88	+	9.06	2.13e-11	5.75e-10
regulation of cation transmembrane transport (GO:1904062)	347	21	3.16	+	6.64	2.14e-11	5.77e-10
morphogenesis of embryonic epithelium (GO:0016331)	149	15	1.36	+	11.05	2.53e-11	6.8e-10
cellular ion homeostasis (GO:0006873)	659	28	6	+	4.66	2.53e-11	6.8e-10
negative regulation of lymphocyte activation (GO:0051250)	150	15	1.37	+	10.97	2.76e-11	7.41e-10
negative regulation of cellular component movement (GO:0051271)	314	20	2.86	+	6.99	2.79e-11	7.47e-10
regulation of phosphatidylinositol 3-kinase activity (GO:0043551)	58	11	0.53	+	20.81	2.81e-11	7.52e-10
regulation of adaptive immune response based on somatic recombination of immune receptors built from immunoglobulin superfamily domains (GO:0002822)	151	15	1.38	+	10.9	3.01e-11	8.04e-10
pallium development (GO:0021543)	180	16	1.64	+	9.75	3.03e-11	8.07e-10
positive regulation of glial cell differentiation (GO:0045687)	42	10	0.38	+	26.13	3.24e-11	8.61e-10
mesenchymal cell differentiation (GO:0048762)	152	15	1.39	+	10.83	3.28e-11	8.72e-10
positive regulation of NF-kappaB transcription factor activity (GO:0051092)	153	15	1.39	+	10.76	3.58e-11	9.48e-10
regulation of glial cell migration (GO:1903975)	17	8	0.15	+	51.64	3.62e-11	9.57e-10
activation of innate immune response (GO:0002218)	248	18	2.26	+	7.97	3.89e-11	1.03e-09
embryonic epithelial tube formation (GO:0001838)	128	14	1.17	+	12	4.33e-11	1.14e-09
myeloid cell development (GO:0061515)	61	11	0.56	+	19.79	4.56e-11	1.2e-09
negative regulation of epithelial cell proliferation (GO:0050680)	129	14	1.18	+	11.91	4.76e-11	1.25e-09
positive regulation of cellular component biogenesis (GO:0044089)	536	25	4.88	+	5.12	5e-11	1.31e-09
female pregnancy (GO:0007565)	187	16	1.7	+	9.39	5.14e-11	1.35e-09
positive regulation of protein localization to nucleus (GO:1900182)	82	12	0.75	+	16.06	5.19e-11	1.36e-09
regulation of embryonic development (GO:0045995)	130	14	1.18	+	11.82	5.23e-11	1.37e-09
regulation of alpha-beta T cell differentiation (GO:0046637)	62	11	0.56	+	19.47	5.32e-11	1.39e-09
metal ion homeostasis (GO:0055065)	633	27	5.77	+	4.68	5.47e-11	1.42e-09
negative regulation of locomotion (GO:0040013)	328	20	2.99	+	6.69	5.83e-11	1.51e-09
regulation of protein import into nucleus (GO:0042306)	63	11	0.57	+	19.16	6.2e-11	1.61e-09
regulation of cellular catabolic process (GO:0031329)	842	31	7.67	+	4.04	6.29e-11	1.63e-09
regulation of synaptic plasticity (GO:0048167)	190	16	1.73	+	9.24	6.41e-11	1.66e-09
positive regulation of peptidyl-serine phosphorylation (GO:0033138)	107	13	0.98	+	13.33	6.62e-11	1.71e-09
divalent inorganic cation homeostasis (GO:0072507)	499	24	4.55	+	5.28	6.91e-11	1.78e-09
positive regulation of cell morphogenesis involved in differentiation (GO:0010770)	161	15	1.47	+	10.22	6.96e-11	1.79e-09
T cell activation involved in immune response (GO:0002286)	64	11	0.58	+	18.86	7.21e-11	1.85e-09
positive regulation of lymphocyte proliferation (GO:0050671)	134	14	1.22	+	11.47	7.58e-11	1.94e-09
neural tube formation (GO:0001841)	109	13	0.99	+	13.09	8.17e-11	2.09e-09
positive regulation of cellular catabolic process (GO:0031331)	375	21	3.42	+	6.15	8.38e-11	2.14e-09
response to metal ion (GO:0010038)	376	21	3.43	+	6.13	8.78e-11	2.24e-09
cardiac septum development (GO:0003279)	110	13	1	+	12.97	9.07e-11	2.31e-09
regulation of smooth muscle cell proliferation (GO:0048660)	136	14	1.24	+	11.3	9.08e-11	2.31e-09
positive regulation of peptidase activity (GO:0010952)	196	16	1.79	+	8.96	9.85e-11	2.5e-09
positive regulation of tumor necrosis factor production (GO:0032760)	88	12	0.8	+	14.96	1.09e-10	2.76e-09
regulation of lipid kinase activity (GO:0043550)	67	11	0.61	+	18.02	1.12e-10	2.83e-09
regulation of neural precursor cell proliferation (GO:2000177)	89	12	0.81	+	14.8	1.23e-10	3.1e-09
regulation of cytokine production involved in immune response (GO:0002718)	89	12	0.81	+	14.8	1.23e-10	3.1e-09
response to hypoxia (GO:0001666)	343	20	3.13	+	6.4	1.23e-10	3.11e-09
positive regulation of glial cell migration (GO:1903977)	11	7	0.1	+	69.84	1.28e-10	3.23e-09
regulation of osteoclast differentiation (GO:0045670)	68	11	0.62	+	17.75	1.29e-10	3.24e-09
phosphate-containing compound metabolic process (GO:0006796)	2142	51	19.52	+	2.61	1.37e-10	3.44e-09
positive regulation of tumor necrosis factor superfamily cytokine production (GO:1903557)	90	12	0.82	+	14.63	1.38e-10	3.46e-09
ameboidal-type cell migration (GO:0001667)	170	15	1.55	+	9.68	1.41e-10	3.53e-09
epithelial cell proliferation (GO:0050673)	91	12	0.83	+	14.47	1.55e-10	3.87e-09
cellular metal ion homeostasis (GO:0006875)	568	25	5.18	+	4.83	1.61e-10	4.01e-09
regulation of synapse structure or activity (GO:0050803)	237	17	2.16	+	7.87	1.65e-10	4.11e-09
negative regulation of myeloid leukocyte differentiation (GO:0002762)	51	10	0.46	+	21.52	1.72e-10	4.27e-09
granulocyte migration (GO:0097530)	92	12	0.84	+	14.31	1.74e-10	4.31e-09
cellular divalent inorganic cation homeostasis (GO:0072503)	478	23	4.36	+	5.28	1.76e-10	4.37e-09
regulation of alpha-beta T cell activation (GO:0046634)	93	12	0.85	+	14.16	1.95e-10	4.81e-09
negative regulation of cellular component organization (GO:0051129)	723	28	6.59	+	4.25	1.97e-10	4.86e-09
muscle structure development (GO:0061061)	481	23	4.38	+	5.25	1.98e-10	4.88e-09
protein metabolic process (GO:0019538)	4298	78	39.16	+	1.99	2.09e-10	5.16e-09
phosphorus metabolic process (GO:0006793)	2169	51	19.76	+	2.58	2.12e-10	5.22e-09
neural tube closure (GO:0001843)	94	12	0.86	+	14.01	2.18e-10	5.35e-09
response to decreased oxygen levels (GO:0036293)	356	20	3.24	+	6.17	2.3e-10	5.63e-09
response to peptide hormone (GO:0043434)	398	21	3.63	+	5.79	2.36e-10	5.78e-09
tube closure (GO:0060606)	95	12	0.87	+	13.86	2.43e-10	5.95e-09
regulation of ion transmembrane transport (GO:0034765)	487	23	4.44	+	5.18	2.5e-10	6.09e-09
regulation of catabolic process (GO:0009894)	1005	33	9.16	+	3.6	2.5e-10	6.09e-09
regulation of leukocyte adhesion to vascular endothelial cell (GO:1904994)	23	8	0.21	+	38.17	2.52e-10	6.13e-09
negative regulation of cell motility (GO:2000146)	281	18	2.56	+	7.03	2.64e-10	6.4e-09
positive regulation of lymphocyte differentiation (GO:0045621)	96	12	0.87	+	13.72	2.72e-10	6.59e-09
cellular response to amyloid-beta (GO:1904646)	37	9	0.34	+	26.69	2.73e-10	6.6e-09
positive regulation of lipid metabolic process (GO:0045834)	149	14	1.36	+	10.31	2.76e-10	6.68e-09
positive regulation of catabolic process (GO:0009896)	445	22	4.05	+	5.43	2.78e-10	6.71e-09
regulation of mitotic cell cycle (GO:0007346)	686	27	6.25	+	4.32	3.05e-10	7.35e-09
regulation of fat cell differentiation (GO:0045598)	123	13	1.12	+	11.6	3.23e-10	7.76e-09
positive regulation of lymphocyte migration (GO:2000403)	38	9	0.35	+	25.99	3.35e-10	8.04e-09
negative regulation of transport (GO:0051051)	496	23	4.52	+	5.09	3.51e-10	8.43e-09
mesenchyme development (GO:0060485)	217	16	1.98	+	8.09	3.99e-10	9.57e-09
regulation of lipid metabolic process (GO:0019216)	411	21	3.75	+	5.61	4.12e-10	9.85e-09
response to steroid hormone (GO:0048545)	329	19	3	+	6.34	4.29e-10	1.02e-08
skeletal system development (GO:0001501)	502	23	4.57	+	5.03	4.39e-10	1.05e-08
multi-multicellular organism process (GO:0044706)	219	16	2	+	8.02	4.53e-10	1.08e-08
primary neural tube formation (GO:0014020)	101	12	0.92	+	13.04	4.63e-10	1.1e-08
cardiac chamber morphogenesis (GO:0003206)	127	13	1.16	+	11.23	4.64e-10	1.1e-08
regulation of tissue remodeling (GO:0034103)	78	11	0.71	+	15.48	4.82e-10	1.14e-08
calcium ion homeostasis (GO:0055074)	459	22	4.18	+	5.26	4.84e-10	1.15e-08
regulation of binding (GO:0051098)	374	20	3.41	+	5.87	5.21e-10	1.23e-08
regulation of animal organ morphogenesis (GO:2000027)	257	17	2.34	+	7.26	5.33e-10	1.26e-08
regulation of protein localization to nucleus (GO:1900180)	129	13	1.18	+	11.06	5.54e-10	1.3e-08
cytokine production (GO:0001816)	158	14	1.44	+	9.72	5.63e-10	1.33e-08
positive regulation of ion transmembrane transport (GO:0034767)	159	14	1.45	+	9.66	6.08e-10	1.43e-08
anatomical structure homeostasis (GO:0060249)	337	19	3.07	+	6.19	6.27e-10	1.47e-08
regulation of cell cycle process (GO:0010564)	763	28	6.95	+	4.03	6.35e-10	1.49e-08
response to oxygen levels (GO:0070482)	380	20	3.46	+	5.78	6.77e-10	1.58e-08
granulocyte chemotaxis (GO:0071621)	81	11	0.74	+	14.9	6.93e-10	1.62e-08
regulation of synapse organization (GO:0050807)	226	16	2.06	+	7.77	6.96e-10	1.62e-08
regulation of protein localization to membrane (GO:1905475)	193	15	1.76	+	8.53	7.31e-10	1.7e-08
regulation of cellular amide metabolic process (GO:0034248)	425	21	3.87	+	5.42	7.33e-10	1.7e-08
cellular response to hormone stimulus (GO:0032870)	613	25	5.59	+	4.48	7.35e-10	1.71e-08
neutrophil migration (GO:1990266)	82	11	0.75	+	14.72	7.8e-10	1.81e-08
regulation of receptor signaling pathway via JAK-STAT (GO:0046425)	133	13	1.21	+	10.73	7.82e-10	1.81e-08
ear development (GO:0043583)	228	16	2.08	+	7.7	7.85e-10	1.82e-08
positive regulation of microglial cell migration (GO:1904141)	7	6	0.06	+	94.06	8.16e-10	1.88e-08
positive regulation of chemokine production (GO:0032722)	61	10	0.56	+	17.99	8.14e-10	1.88e-08
negative regulation of cell migration (GO:0030336)	266	17	2.42	+	7.01	8.75e-10	2.01e-08
regulation of cytokine-mediated signaling pathway (GO:0001959)	164	14	1.49	+	9.37	8.85e-10	2.03e-08
cellular response to interferon-gamma (GO:0071346)	164	14	1.49	+	9.37	8.85e-10	2.03e-08
cellular protein modification process (GO:0006464)	3079	62	28.06	+	2.21	8.99e-10	2.06e-08
protein modification process (GO:0036211)	3079	62	28.06	+	2.21	8.99e-10	2.06e-08
organelle organization (GO:0006996)	3428	66	31.24	+	2.11	9.51e-10	2.17e-08
positive regulation of adaptive immune response (GO:0002821)	109	12	0.99	+	12.08	1.03e-09	2.35e-08
regulation of lymphocyte migration (GO:2000401)	63	10	0.57	+	17.42	1.08e-09	2.46e-08
regulation of receptor signaling pathway via STAT (GO:1904892)	137	13	1.25	+	10.41	1.09e-09	2.49e-08
positive regulation of T cell differentiation (GO:0045582)	85	11	0.77	+	14.2	1.1e-09	2.5e-08
positive regulation of receptor signaling pathway via JAK-STAT (GO:0046427)	85	11	0.77	+	14.2	1.1e-09	2.5e-08
epithelial cell differentiation (GO:0030855)	679	26	6.19	+	4.2	1.18e-09	2.66e-08
osteoclast differentiation (GO:0030316)	45	9	0.41	+	21.95	1.24e-09	2.8e-08
negative regulation of secretion by cell (GO:1903531)	202	15	1.84	+	8.15	1.31e-09	2.97e-08
regulation of microglial cell migration (GO:1904139)	8	6	0.07	+	82.31	1.42e-09	3.2e-08
regulation of CD4-positive, alpha-beta T cell differentiation (GO:0043370)	46	9	0.42	+	21.47	1.47e-09	3.31e-08
regulation of neurotransmitter levels (GO:0001505)	356	19	3.24	+	5.86	1.49e-09	3.35e-08
embryonic placenta development (GO:0001892)	88	11	0.8	+	13.72	1.54e-09	3.45e-08
positive regulation of receptor signaling pathway via STAT (GO:1904894)	88	11	0.8	+	13.72	1.54e-09	3.45e-08
positive regulation of animal organ morphogenesis (GO:0110110)	88	11	0.8	+	13.72	1.54e-09	3.46e-08
urogenital system development (GO:0001655)	316	18	2.88	+	6.25	1.55e-09	3.48e-08
alpha-beta T cell activation (GO:0046631)	66	10	0.6	+	16.63	1.62e-09	3.62e-08
cellular calcium ion homeostasis (GO:0006874)	446	21	4.06	+	5.17	1.67e-09	3.73e-08
response to chemokine (GO:1990868)	89	11	0.81	+	13.56	1.71e-09	3.81e-08
cellular response to chemokine (GO:1990869)	89	11	0.81	+	13.56	1.71e-09	3.82e-08
response to amyloid-beta (GO:1904645)	47	9	0.43	+	21.01	1.73e-09	3.85e-08
developmental growth involved in morphogenesis (GO:0060560)	116	12	1.06	+	11.35	1.98e-09	4.38e-08
regulation of cysteine-type endopeptidase activity (GO:2000116)	245	16	2.23	+	7.17	2.09e-09	4.63e-08
positive regulation of tyrosine phosphorylation of STAT protein (GO:0042531)	68	10	0.62	+	16.14	2.1e-09	4.65e-08
multicellular organismal homeostasis (GO:0048871)	323	18	2.94	+	6.12	2.16e-09	4.77e-08
positive regulation of endopeptidase activity (GO:0010950)	177	14	1.61	+	8.68	2.22e-09	4.9e-08
positive regulation of binding (GO:0051099)	177	14	1.61	+	8.68	2.22e-09	4.91e-08
response to alcohol (GO:0097305)	247	16	2.25	+	7.11	2.33e-09	5.13e-08
regulation of blood vessel endothelial cell migration (GO:0043535)	92	11	0.84	+	13.12	2.36e-09	5.18e-08
cell-cell adhesion (GO:0098609)	502	22	4.57	+	4.81	2.37e-09	5.21e-08
vascular endothelial growth factor receptor signaling pathway (GO:0048010)	69	10	0.63	+	15.9	2.39e-09	5.23e-08
positive regulation of cation transmembrane transport (GO:1904064)	147	13	1.34	+	9.71	2.42e-09	5.3e-08
macrophage migration (GO:1905517)	19	7	0.17	+	40.43	2.49e-09	5.45e-08
positive regulation of apoptotic signaling pathway (GO:2001235)	179	14	1.63	+	8.58	2.55e-09	5.56e-08
negative regulation of cell-cell adhesion (GO:0022408)	180	14	1.64	+	8.54	2.72e-09	5.93e-08
nitrogen compound metabolic process (GO:0006807)	7000	104	63.79	+	1.63	2.79e-09	6.08e-08
humoral immune response (GO:0006959)	372	19	3.39	+	5.61	2.96e-09	6.44e-08
activation of protein kinase activity (GO:0032147)	332	18	3.03	+	5.95	3.25e-09	7.06e-08
regulation of cytoskeleton organization (GO:0051493)	560	23	5.1	+	4.51	3.28e-09	7.1e-08
regulation of lymphocyte mediated immunity (GO:0002706)	153	13	1.39	+	9.32	3.8e-09	8.22e-08
regulation of protein stability (GO:0031647)	295	17	2.69	+	6.32	3.83e-09	8.29e-08
extrinsic apoptotic signaling pathway (GO:0097191)	97	11	0.88	+	12.44	3.92e-09	8.47e-08
response to interferon-gamma (GO:0034341)	186	14	1.69	+	8.26	4.04e-09	8.71e-08
organic substance metabolic process (GO:0071704)	7840	112	71.44	+	1.57	4.16e-09	8.95e-08
regionalization (GO:0003002)	338	18	3.08	+	5.84	4.25e-09	9.13e-08
negative regulation of leukocyte cell-cell adhesion (GO:1903038)	125	12	1.14	+	10.54	4.31e-09	9.26e-08
integrin-mediated signaling pathway (GO:0007229)	98	11	0.89	+	12.32	4.33e-09	9.28e-08
neutrophil chemotaxis (GO:0030593)	74	10	0.67	+	14.83	4.4e-09	9.4e-08
response to nutrient (GO:0007584)	222	15	2.02	+	7.42	4.4e-09	9.4e-08
regulation of cysteine-type endopeptidase activity involved in apoptotic process (GO:0043281)	222	15	2.02	+	7.42	4.4e-09	9.41e-08
alpha-beta T cell differentiation (GO:0046632)	53	9	0.48	+	18.64	4.43e-09	9.43e-08
positive regulation of phospholipid metabolic process (GO:1903727)	53	9	0.48	+	18.64	4.43e-09	9.44e-08
negative regulation of lymphocyte differentiation (GO:0045620)	53	9	0.48	+	18.64	4.43e-09	9.46e-08
organonitrogen compound metabolic process (GO:1901564)	5307	86	48.36	+	1.78	4.53e-09	9.62e-08
positive regulation of phosphatidylinositol 3-kinase activity (GO:0043552)	36	8	0.33	+	24.39	5.12e-09	1.08e-07
cell-matrix adhesion (GO:0007160)	127	12	1.16	+	10.37	5.09e-09	1.08e-07
cellular protein metabolic process (GO:0044267)	3704	68	33.75	+	2.01	5.13e-09	1.09e-07
lens development in camera-type eye (GO:0002088)	76	10	0.69	+	14.44	5.56e-09	1.17e-07
cardiac ventricle development (GO:0003231)	128	12	1.17	+	10.29	5.52e-09	1.17e-07
macromolecule modification (GO:0043412)	3299	63	30.06	+	2.1	5.71e-09	1.2e-07
regulation of interferon-gamma production (GO:0032649)	101	11	0.92	+	11.95	5.78e-09	1.22e-07
regeneration (GO:0031099)	159	13	1.45	+	8.97	5.85e-09	1.23e-07
negative regulation of secretion (GO:0051048)	228	15	2.08	+	7.22	6.17e-09	1.3e-07
signal transduction by protein phosphorylation (GO:0023014)	391	19	3.56	+	5.33	6.42e-09	1.35e-07
sex differentiation (GO:0007548)	267	16	2.43	+	6.58	6.66e-09	1.39e-07
response to reactive oxygen species (GO:0000302)	194	14	1.77	+	7.92	6.69e-09	1.4e-07
positive regulation of blood vessel endothelial cell migration (GO:0043536)	56	9	0.51	+	17.64	6.83e-09	1.43e-07
positive regulation of production of molecular mediator of immune response (GO:0002702)	103	11	0.94	+	11.72	6.98e-09	1.46e-07
liver development (GO:0001889)	131	12	1.19	+	10.05	7.03e-09	1.46e-07
cellular response to environmental stimulus (GO:0104004)	309	17	2.82	+	6.04	7.39e-09	1.53e-07
cellular response to abiotic stimulus (GO:0071214)	309	17	2.82	+	6.04	7.39e-09	1.54e-07
positive regulation of adaptive immune response based on somatic recombination of immune receptors built from immunoglobulin superfamily domains (GO:0002824)	104	11	0.95	+	11.61	7.66e-09	1.59e-07
regulation of tyrosine phosphorylation of STAT protein (GO:0042509)	79	10	0.72	+	13.89	7.79e-09	1.61e-07
positive regulation of response to cytokine stimulus (GO:0060760)	57	9	0.52	+	17.33	7.84e-09	1.62e-07
kidney development (GO:0001822)	271	16	2.47	+	6.48	8.12e-09	1.68e-07
response to acid chemical (GO:0001101)	354	18	3.23	+	5.58	8.43e-09	1.74e-07
response to tumor necrosis factor (GO:0034612)	272	16	2.48	+	6.46	8.53e-09	1.76e-07
regulation of epithelial cell apoptotic process (GO:1904035)	80	10	0.73	+	13.72	8.7e-09	1.79e-07
protein kinase B signaling (GO:0043491)	39	8	0.36	+	22.51	8.87e-09	1.82e-07
hepaticobiliary system development (GO:0061008)	134	12	1.22	+	9.83	8.9e-09	1.83e-07
positive regulation of type I interferon production (GO:0032481)	81	10	0.74	+	13.55	9.7e-09	1.99e-07
protein localization (GO:0008104)	2201	48	20.06	+	2.39	9.92e-09	2.03e-07
regulation of cell shape (GO:0008360)	167	13	1.52	+	8.54	1.01e-08	2.07e-07
inner ear development (GO:0048839)	201	14	1.83	+	7.64	1.02e-08	2.09e-07
positive regulation of lipid kinase activity (GO:0090218)	40	8	0.36	+	21.95	1.06e-08	2.15e-07
positive regulation of response to endoplasmic reticulum stress (GO:1905898)	40	8	0.36	+	21.95	1.06e-08	2.16e-07
regulation of peptidase activity (GO:0052547)	452	20	4.12	+	4.86	1.14e-08	2.32e-07
negative regulation of catalytic activity (GO:0043086)	817	27	7.44	+	3.63	1.14e-08	2.32e-07
regulation of CD4-positive, alpha-beta T cell activation (GO:2000514)	60	9	0.55	+	16.46	1.17e-08	2.38e-07
regulation of pri-miRNA transcription by RNA polymerase II (GO:1902893)	41	8	0.37	+	21.41	1.25e-08	2.54e-07
stem cell population maintenance (GO:0019827)	139	12	1.27	+	9.47	1.3e-08	2.64e-07
renal system development (GO:0072001)	281	16	2.56	+	6.25	1.32e-08	2.66e-07
cell-cell signaling (GO:0007267)	1122	32	10.22	+	3.13	1.34e-08	2.71e-07
response to estradiol (GO:0032355)	140	12	1.28	+	9.41	1.4e-08	2.83e-07
CD4-positive, alpha-beta T cell activation (GO:0035710)	42	8	0.38	+	20.9	1.48e-08	2.98e-07
positive regulation of mononuclear cell migration (GO:0071677)	26	7	0.24	+	29.55	1.54e-08	3.09e-07
regulation of osteoblast differentiation (GO:0045667)	112	11	1.02	+	10.78	1.56e-08	3.13e-07
sexual reproduction (GO:0019953)	831	27	7.57	+	3.57	1.61e-08	3.23e-07
maintenance of cell number (GO:0098727)	142	12	1.29	+	9.27	1.63e-08	3.26e-07
neural crest cell differentiation (GO:0014033)	86	10	0.78	+	12.76	1.64e-08	3.28e-07
adaptive immune response (GO:0002250)	613	23	5.59	+	4.12	1.67e-08	3.33e-07
limbic system development (GO:0021761)	113	11	1.03	+	10.68	1.7e-08	3.39e-07
regulation of B cell proliferation (GO:0030888)	63	9	0.57	+	15.68	1.72e-08	3.43e-07
positive regulation of endoplasmic reticulum unfolded protein response (GO:1900103)	14	6	0.13	+	47.03	1.75e-08	3.48e-07
regulation of leukocyte apoptotic process (GO:2000106)	87	10	0.79	+	12.61	1.81e-08	3.6e-07
response to ionizing radiation (GO:0010212)	144	12	1.31	+	9.15	1.88e-08	3.73e-07
regulation of B cell activation (GO:0050864)	213	14	1.94	+	7.21	2.04e-08	4.04e-07
post-embryonic development (GO:0009791)	89	10	0.81	+	12.33	2.21e-08	4.38e-07
appendage development (GO:0048736)	180	13	1.64	+	7.93	2.33e-08	4.61e-07
limb development (GO:0060173)	180	13	1.64	+	7.93	2.33e-08	4.62e-07
alpha-beta T cell activation involved in immune response (GO:0002287)	28	7	0.26	+	27.44	2.38e-08	4.69e-07
regulation of monocyte chemotaxis (GO:0090025)	28	7	0.26	+	27.44	2.38e-08	4.69e-07
defense response to bacterium (GO:0042742)	336	17	3.06	+	5.55	2.39e-08	4.69e-07
alpha-beta T cell differentiation involved in immune response (GO:0002293)	28	7	0.26	+	27.44	2.38e-08	4.7e-07
regulation of erythrocyte differentiation (GO:0045646)	45	8	0.41	+	19.51	2.39e-08	4.7e-07
cell-substrate adhesion (GO:0031589)	181	13	1.65	+	7.88	2.48e-08	4.87e-07
response to hydrogen peroxide (GO:0042542)	118	11	1.08	+	10.23	2.57e-08	5.03e-07
positive regulation of developmental growth (GO:0048639)	182	13	1.66	+	7.84	2.64e-08	5.17e-07
metabolic process (GO:0008152)	8403	115	76.57	+	1.5	2.65e-08	5.18e-07
cell junction organization (GO:0034330)	218	14	1.99	+	7.05	2.68e-08	5.23e-07
metencephalon development (GO:0022037)	119	11	1.08	+	10.14	2.78e-08	5.43e-07
maternal process involved in female pregnancy (GO:0060135)	67	9	0.61	+	14.74	2.79e-08	5.44e-07
cellular response to nutrient levels (GO:0031669)	257	15	2.34	+	6.41	2.8e-08	5.44e-07
intrinsic apoptotic signaling pathway (GO:0097193)	150	12	1.37	+	8.78	2.87e-08	5.57e-07
primary metabolic process (GO:0044238)	7465	106	68.02	+	1.56	2.98e-08	5.78e-07
regulation of protein localization to cell periphery (GO:1904375)	120	11	1.09	+	10.06	3.01e-08	5.84e-07
eye morphogenesis (GO:0048592)	151	12	1.38	+	8.72	3.07e-08	5.94e-07
system process (GO:0003008)	1979	44	18.03	+	2.44	3.12e-08	6.04e-07
positive regulation of chromosome organization (GO:2001252)	185	13	1.69	+	7.71	3.16e-08	6.11e-07
pattern specification process (GO:0007389)	434	19	3.95	+	4.8	3.18e-08	6.13e-07
leukocyte migration involved in inflammatory response (GO:0002523)	16	6	0.15	+	41.15	3.31e-08	6.38e-07
innate immune response-activating signal transduction (GO:0002758)	223	14	2.03	+	6.89	3.5e-08	6.74e-07
ERBB signaling pathway (GO:0038127)	69	9	0.63	+	14.31	3.52e-08	6.77e-07
regulation of interleukin-1 production (GO:0032652)	94	10	0.86	+	11.67	3.56e-08	6.83e-07
positive regulation of pri-miRNA transcription by RNA polymerase II (GO:1902895)	30	7	0.27	+	25.61	3.59e-08	6.87e-07
response to X-ray (GO:0010165)	30	7	0.27	+	25.61	3.59e-08	6.88e-07
regulation of cell adhesion mediated by integrin (GO:0033628)	48	8	0.44	+	18.29	3.74e-08	7.14e-07
response to light stimulus (GO:0009416)	304	16	2.77	+	5.78	3.74e-08	7.15e-07
leukocyte proliferation (GO:0070661)	95	10	0.87	+	11.55	3.9e-08	7.45e-07
intrinsic apoptotic signaling pathway in response to DNA damage (GO:0008630)	70	9	0.64	+	14.11	3.94e-08	7.51e-07
positive regulation of cysteine-type endopeptidase activity (GO:2001056)	155	12	1.41	+	8.5	4.02e-08	7.65e-07
regulation of phosphatidylinositol 3-kinase signaling (GO:0014066)	124	11	1.13	+	9.74	4.12e-08	7.82e-07
neuron migration (GO:0001764)	124	11	1.13	+	9.74	4.12e-08	7.83e-07
response to transforming growth factor beta (GO:0071559)	156	12	1.42	+	8.44	4.3e-08	8.15e-07
positive regulation of T cell migration (GO:2000406)	31	7	0.28	+	24.78	4.37e-08	8.27e-07
regulation of amyloid-beta clearance (GO:1900221)	17	6	0.15	+	38.73	4.45e-08	8.42e-07
macromolecule localization (GO:0033036)	2537	51	23.12	+	2.21	4.5e-08	8.51e-07
regulation of axonogenesis (GO:0050770)	192	13	1.75	+	7.43	4.77e-08	9.01e-07
ventricular septum development (GO:0003281)	72	9	0.66	+	13.72	4.92e-08	9.28e-07
regulation of neuroinflammatory response (GO:0150077)	32	7	0.29	+	24.01	5.28e-08	9.92e-07
T cell differentiation involved in immune response (GO:0002292)	32	7	0.29	+	24.01	5.28e-08	9.93e-07
regulation of glial cell proliferation (GO:0060251)	32	7	0.29	+	24.01	5.28e-08	9.94e-07
regulation of stress-activated protein kinase signaling cascade (GO:0070302)	231	14	2.1	+	6.65	5.3e-08	9.95e-07
cardiac septum morphogenesis (GO:0060411)	73	9	0.67	+	13.53	5.48e-08	1.03e-06
regulation of endothelial cell proliferation (GO:0001936)	128	11	1.17	+	9.43	5.57e-08	1.04e-06
regulation of protein localization to plasma membrane (GO:1903076)	99	10	0.9	+	11.09	5.59e-08	1.05e-06
mature B cell differentiation involved in immune response (GO:0002313)	18	6	0.16	+	36.58	5.89e-08	1.1e-06
glial cell proliferation (GO:0014009)	18	6	0.16	+	36.58	5.89e-08	1.1e-06
positive regulation of leukocyte adhesion to vascular endothelial cell (GO:1904996)	18	6	0.16	+	36.58	5.89e-08	1.1e-06
regulation of actin cytoskeleton organization (GO:0032956)	359	17	3.27	+	5.2	5.98e-08	1.11e-06
regulation of DNA binding (GO:0051101)	129	11	1.18	+	9.36	6e-08	1.12e-06
negative regulation of catabolic process (GO:0009895)	316	16	2.88	+	5.56	6.22e-08	1.16e-06
negative regulation of cellular response to growth factor stimulus (GO:0090288)	162	12	1.48	+	8.13	6.34e-08	1.17e-06
erythrocyte development (GO:0048821)	33	7	0.3	+	23.28	6.35e-08	1.18e-06
negative regulation of B cell activation (GO:0050869)	33	7	0.3	+	23.28	6.35e-08	1.18e-06
lymphocyte homeostasis (GO:0002260)	52	8	0.47	+	16.88	6.53e-08	1.21e-06
positive regulation of DNA metabolic process (GO:0051054)	199	13	1.81	+	7.17	7.08e-08	1.31e-06
gland morphogenesis (GO:0022612)	102	10	0.93	+	10.76	7.25e-08	1.34e-06
regulation of protein complex assembly (GO:0043254)	459	19	4.18	+	4.54	7.4e-08	1.36e-06
cellular defense response (GO:0006968)	53	8	0.48	+	16.56	7.46e-08	1.37e-06
leukocyte cell-cell adhesion (GO:0007159)	53	8	0.48	+	16.56	7.46e-08	1.37e-06
cellular response to reactive oxygen species (GO:0034614)	132	11	1.2	+	9.15	7.47e-08	1.37e-06
response to interleukin-1 (GO:0070555)	200	13	1.82	+	7.13	7.48e-08	1.37e-06
regulation of interleukin-8 production (GO:0032677)	76	9	0.69	+	13	7.53e-08	1.38e-06
neural crest cell development (GO:0014032)	77	9	0.7	+	12.83	8.34e-08	1.53e-06
stem cell proliferation (GO:0072089)	54	8	0.49	+	16.26	8.5e-08	1.55e-06
regulation of macrophage activation (GO:0043030)	54	8	0.49	+	16.26	8.5e-08	1.55e-06
regulation of substrate adhesion-dependent cell spreading (GO:1900024)	54	8	0.49	+	16.26	8.5e-08	1.55e-06
positive regulation of interleukin-6 secretion (GO:2000778)	35	7	0.32	+	21.95	9.05e-08	1.65e-06
regulation of transmembrane receptor protein serine/threonine kinase signaling pathway (GO:0090092)	242	14	2.21	+	6.35	9.15e-08	1.66e-06
negative regulation of CD4-positive, alpha-beta T cell differentiation (GO:0043371)	20	6	0.18	+	32.92	9.92e-08	1.8e-06
positive regulation of tumor necrosis factor biosynthetic process (GO:0042535)	20	6	0.18	+	32.92	9.92e-08	1.8e-06
positive regulation of leukocyte mediated immunity (GO:0002705)	136	11	1.24	+	8.88	9.91e-08	1.8e-06
response to virus (GO:0009615)	285	15	2.6	+	5.78	1.01e-07	1.83e-06
striated muscle tissue development (GO:0014706)	285	15	2.6	+	5.78	1.01e-07	1.83e-06
chemokine-mediated signaling pathway (GO:0070098)	79	9	0.72	+	12.5	1.02e-07	1.84e-06
cellular response to radiation (GO:0071478)	170	12	1.55	+	7.75	1.04e-07	1.87e-06
regulation of supramolecular fiber organization (GO:1902903)	374	17	3.41	+	4.99	1.05e-07	1.89e-06
cellular response to tumor necrosis factor (GO:0071356)	245	14	2.23	+	6.27	1.06e-07	1.9e-06
CD4-positive, alpha-beta T cell differentiation (GO:0043367)	36	7	0.33	+	21.34	1.07e-07	1.93e-06
regulation of monooxygenase activity (GO:0032768)	56	8	0.51	+	15.68	1.1e-07	1.97e-06
regulation of endopeptidase activity (GO:0052548)	423	18	3.85	+	4.67	1.12e-07	2.01e-06
regulation of interleukin-1 beta production (GO:0032651)	80	9	0.73	+	12.35	1.13e-07	2.02e-06
positive regulation of NIK/NF-kappaB signaling (GO:1901224)	80	9	0.73	+	12.35	1.13e-07	2.02e-06
response to ethanol (GO:0045471)	139	11	1.27	+	8.68	1.22e-07	2.18e-06
positive regulation of cysteine-type endopeptidase activity involved in apoptotic process (GO:0043280)	139	11	1.27	+	8.68	1.22e-07	2.18e-06
mesenchymal cell development (GO:0014031)	81	9	0.74	+	12.19	1.24e-07	2.21e-06
stem cell development (GO:0048864)	81	9	0.74	+	12.19	1.24e-07	2.21e-06
nerve development (GO:0021675)	81	9	0.74	+	12.19	1.24e-07	2.22e-06
positive regulation of monocyte chemotaxis (GO:0090026)	21	6	0.19	+	31.35	1.27e-07	2.25e-06
positive regulation of amyloid precursor protein catabolic process (GO:1902993)	21	6	0.19	+	31.35	1.27e-07	2.25e-06
regulation of NIK/NF-kappaB signaling (GO:1901222)	109	10	0.99	+	10.07	1.29e-07	2.29e-06
cellular metabolic process (GO:0044237)	7652	106	69.73	+	1.52	1.32e-07	2.33e-06
gamete generation (GO:0007276)	691	23	6.3	+	3.65	1.36e-07	2.4e-06
positive regulation of protein localization to plasma membrane (GO:1903078)	58	8	0.53	+	15.14	1.4e-07	2.47e-06
mammary gland epithelium development (GO:0061180)	58	8	0.53	+	15.14	1.4e-07	2.47e-06
cerebellum development (GO:0021549)	110	10	1	+	9.98	1.4e-07	2.47e-06
regulation of GTPase activity (GO:0043087)	480	19	4.37	+	4.34	1.44e-07	2.54e-06
maternal placenta development (GO:0001893)	38	7	0.35	+	20.22	1.49e-07	2.62e-06
regulation of fibroblast proliferation (GO:0048145)	83	9	0.76	+	11.9	1.5e-07	2.65e-06
regulation of transforming growth factor beta receptor signaling pathway (GO:0017015)	111	10	1.01	+	9.89	1.51e-07	2.65e-06
positive regulation of cytokine production involved in immune response (GO:0002720)	59	8	0.54	+	14.88	1.58e-07	2.77e-06
positive regulation of hepatocyte proliferation (GO:2000347)	10	5	0.09	+	54.87	1.59e-07	2.79e-06
regulation of macrophage differentiation (GO:0045649)	22	6	0.2	+	29.93	1.6e-07	2.8e-06
positive regulation of protein complex assembly (GO:0031334)	254	14	2.31	+	6.05	1.61e-07	2.81e-06
positive regulation of cytosolic calcium ion concentration (GO:0007204)	296	15	2.7	+	5.56	1.62e-07	2.82e-06
antigen receptor-mediated signaling pathway (GO:0050851)	296	15	2.7	+	5.56	1.62e-07	2.82e-06
regulation of cytosolic calcium ion concentration (GO:0051480)	340	16	3.1	+	5.16	1.61e-07	2.82e-06
regulation of epithelial cell differentiation (GO:0030856)	144	11	1.31	+	8.38	1.7e-07	2.96e-06
regulation of oligodendrocyte differentiation (GO:0048713)	39	7	0.36	+	19.7	1.74e-07	3.03e-06
positive regulation of substrate adhesion-dependent cell spreading (GO:1900026)	39	7	0.36	+	19.7	1.74e-07	3.03e-06
negative regulation of cell projection organization (GO:0031345)	179	12	1.63	+	7.36	1.76e-07	3.05e-06
regulation of cellular response to transforming growth factor beta stimulus (GO:1903844)	113	10	1.03	+	9.71	1.76e-07	3.06e-06
muscle tissue development (GO:0060537)	299	15	2.72	+	5.51	1.83e-07	3.17e-06
T cell receptor signaling pathway (GO:0050852)	180	12	1.64	+	7.32	1.86e-07	3.22e-06
response to mechanical stimulus (GO:0009612)	218	13	1.99	+	6.54	1.92e-07	3.32e-06
positive regulation of synaptic transmission (GO:0050806)	146	11	1.33	+	8.27	1.94e-07	3.35e-06
regulation of hormone levels (GO:0010817)	542	20	4.94	+	4.05	1.97e-07	3.4e-06
B cell homeostasis (GO:0001782)	23	6	0.21	+	28.63	2e-07	3.45e-06
glial cell migration (GO:0008347)	40	7	0.36	+	19.2	2.03e-07	3.49e-06
modification of morphology or physiology of other organism (GO:0035821)	182	12	1.66	+	7.24	2.08e-07	3.58e-06
transcription by RNA polymerase II (GO:0006366)	494	19	4.5	+	4.22	2.21e-07	3.79e-06
establishment of protein localization (GO:0045184)	1617	37	14.73	+	2.51	2.23e-07	3.82e-06
cellular response to transforming growth factor beta stimulus (GO:0071560)	149	11	1.36	+	8.1	2.35e-07	4.02e-06
regulation of stem cell differentiation (GO:2000736)	117	10	1.07	+	9.38	2.38e-07	4.08e-06
actin cytoskeleton organization (GO:0030036)	497	19	4.53	+	4.2	2.42e-07	4.12e-06
regulation of body fluid levels (GO:0050878)	497	19	4.53	+	4.2	2.42e-07	4.13e-06
response to salt stress (GO:0009651)	24	6	0.22	+	27.44	2.48e-07	4.23e-06
negative regulation of alpha-beta T cell differentiation (GO:0046639)	24	6	0.22	+	27.44	2.48e-07	4.23e-06
mature B cell differentiation (GO:0002335)	24	6	0.22	+	27.44	2.48e-07	4.24e-06
forebrain cell migration (GO:0021885)	63	8	0.57	+	13.94	2.5e-07	4.24e-06
regulation of protein catabolic process (GO:0042176)	399	17	3.64	+	4.68	2.52e-07	4.29e-06
peptidyl-tyrosine phosphorylation (GO:0018108)	151	11	1.38	+	7.99	2.66e-07	4.52e-06
cellular extravasation (GO:0045123)	42	7	0.38	+	18.29	2.73e-07	4.63e-06
regulation of cell-matrix adhesion (GO:0001952)	119	10	1.08	+	9.22	2.76e-07	4.67e-06
regulation of actin filament-based process (GO:0032970)	402	17	3.66	+	4.64	2.79e-07	4.72e-06
regulation of Ras protein signal transduction (GO:0046578)	188	12	1.71	+	7	2.89e-07	4.89e-06
pattern recognition receptor signaling pathway (GO:0002221)	120	10	1.09	+	9.15	2.97e-07	5.01e-06
tissue homeostasis (GO:0001894)	189	12	1.72	+	6.97	3.05e-07	5.15e-06
positive regulation of protein localization to cell periphery (GO:1904377)	65	8	0.59	+	13.51	3.11e-07	5.23e-06
regulation of stress-activated MAPK cascade (GO:0032872)	228	13	2.08	+	6.26	3.13e-07	5.26e-06
regulation of execution phase of apoptosis (GO:1900117)	43	7	0.39	+	17.86	3.15e-07	5.3e-06
peptidyl-tyrosine modification (GO:0018212)	154	11	1.4	+	7.84	3.2e-07	5.38e-06
regulation of DNA metabolic process (GO:0051052)	360	16	3.28	+	4.88	3.37e-07	5.65e-06
regulation of immunoglobulin production (GO:0002637)	66	8	0.6	+	13.3	3.46e-07	5.79e-06
regulation of hormone secretion (GO:0046883)	272	14	2.48	+	5.65	3.54e-07	5.93e-06
regulation of T cell migration (GO:2000404)	44	7	0.4	+	17.46	3.63e-07	6.04e-06
cell maturation (GO:0048469)	156	11	1.42	+	7.74	3.62e-07	6.04e-06
B cell activation involved in immune response (GO:0002312)	44	7	0.4	+	17.46	3.63e-07	6.05e-06
negative regulation of T cell differentiation (GO:0045581)	44	7	0.4	+	17.46	3.63e-07	6.06e-06
positive regulation of endothelial cell proliferation (GO:0001938)	93	9	0.85	+	10.62	3.67e-07	6.1e-06
negative regulation of immune effector process (GO:0002698)	123	10	1.12	+	8.92	3.67e-07	6.11e-06
regulation of lymphocyte chemotaxis (GO:1901623)	26	6	0.24	+	25.33	3.73e-07	6.2e-06
Notch signaling pathway (GO:0007219)	124	10	1.13	+	8.85	3.94e-07	6.53e-06
response to purine-containing compound (GO:0014074)	158	11	1.44	+	7.64	4.07e-07	6.75e-06
positive regulation of mitotic cell cycle (GO:0045931)	158	11	1.44	+	7.64	4.07e-07	6.75e-06
MAPK cascade (GO:0000165)	366	16	3.34	+	4.8	4.16e-07	6.88e-06
ear morphogenesis (GO:0042471)	125	10	1.14	+	8.78	4.22e-07	6.96e-06
positive regulation of protein localization to membrane (GO:1905477)	125	10	1.14	+	8.78	4.22e-07	6.97e-06
regulation of extrinsic apoptotic signaling pathway (GO:2001236)	159	11	1.45	+	7.59	4.32e-07	7.13e-06
regulation of actin filament organization (GO:0110053)	277	14	2.52	+	5.55	4.37e-07	7.2e-06
neutrophil homeostasis (GO:0001780)	13	5	0.12	+	42.21	4.44e-07	7.29e-06
regulation of tau-protein kinase activity (GO:1902947)	13	5	0.12	+	42.21	4.44e-07	7.29e-06
hematopoietic stem cell differentiation (GO:0060218)	13	5	0.12	+	42.21	4.44e-07	7.3e-06
T-helper cell differentiation (GO:0042093)	27	6	0.25	+	24.39	4.53e-07	7.39e-06
decidualization (GO:0046697)	27	6	0.25	+	24.39	4.53e-07	7.4e-06
mRNA transcription (GO:0009299)	27	6	0.25	+	24.39	4.53e-07	7.41e-06
leukocyte apoptotic process (GO:0071887)	27	6	0.25	+	24.39	4.53e-07	7.42e-06
CD4-positive, alpha-beta T cell differentiation involved in immune response (GO:0002294)	27	6	0.25	+	24.39	4.53e-07	7.42e-06
positive regulation of osteoclast differentiation (GO:0045672)	27	6	0.25	+	24.39	4.53e-07	7.43e-06
epithelial cell development (GO:0002064)	197	12	1.8	+	6.68	4.64e-07	7.57e-06
regulation of anatomical structure size (GO:0090066)	520	19	4.74	+	4.01	4.69e-07	7.63e-06
regulation of toll-like receptor signaling pathway (GO:0034121)	69	8	0.63	+	12.72	4.71e-07	7.67e-06
positive regulation of cellular amide metabolic process (GO:0034250)	161	11	1.47	+	7.5	4.86e-07	7.9e-06
actin filament-based process (GO:0030029)	575	20	5.24	+	3.82	4.86e-07	7.9e-06
regulation of translation (GO:0006417)	371	16	3.38	+	4.73	4.95e-07	8.03e-06
positive regulation of T cell proliferation (GO:0042102)	97	9	0.88	+	10.18	5.1e-07	8.27e-06
respiratory system development (GO:0060541)	199	12	1.81	+	6.62	5.14e-07	8.32e-06
trabecula morphogenesis (GO:0061383)	47	7	0.43	+	16.34	5.42e-07	8.77e-06
Fc receptor signaling pathway (GO:0038093)	240	13	2.19	+	5.94	5.44e-07	8.79e-06
regulation of endoplasmic reticulum unfolded protein response (GO:1900101)	28	6	0.26	+	23.52	5.46e-07	8.8e-06
regulation of histone modification (GO:0031056)	163	11	1.49	+	7.41	5.45e-07	8.8e-06
regulation of type I interferon production (GO:0032479)	129	10	1.18	+	8.51	5.53e-07	8.9e-06
positive regulation of histone modification (GO:0031058)	98	9	0.89	+	10.08	5.53e-07	8.91e-06
lymphocyte migration (GO:0072676)	71	8	0.65	+	12.37	5.76e-07	9.24e-06
oligodendrocyte differentiation (GO:0048709)	71	8	0.65	+	12.37	5.76e-07	9.25e-06
negative regulation of protein secretion (GO:0050709)	130	10	1.18	+	8.44	5.91e-07	9.48e-06
cellular component assembly (GO:0022607)	2424	47	22.09	+	2.13	5.96e-07	9.55e-06
positive regulation of neuroinflammatory response (GO:0150078)	14	5	0.13	+	39.19	5.98e-07	9.57e-06
toll-like receptor signaling pathway (GO:0002224)	99	9	0.9	+	9.98	5.98e-07	9.57e-06
process utilizing autophagic mechanism (GO:0061919)	285	14	2.6	+	5.39	6.05e-07	9.64e-06
mitotic cell cycle (GO:0000278)	696	22	6.34	+	3.47	6.04e-07	9.64e-06
autophagy (GO:0006914)	285	14	2.6	+	5.39	6.05e-07	9.65e-06
regulation of axon extension (GO:0030516)	100	9	0.91	+	9.88	6.47e-07	1.03e-05
positive regulation of stress-activated protein kinase signaling cascade (GO:0070304)	166	11	1.51	+	7.27	6.46e-07	1.03e-05
negative regulation of CD4-positive, alpha-beta T cell activation (GO:2000515)	29	6	0.26	+	22.71	6.54e-07	1.04e-05
regulation of autophagy (GO:0010506)	333	15	3.03	+	4.94	6.77e-07	1.08e-05
epidermal growth factor receptor signaling pathway (GO:0007173)	49	7	0.45	+	15.68	6.99e-07	1.11e-05
regulation of endothelial cell apoptotic process (GO:2000351)	49	7	0.45	+	15.68	6.99e-07	1.11e-05
neural precursor cell proliferation (GO:0061351)	74	8	0.67	+	11.86	7.68e-07	1.21e-05
regulation of striated muscle tissue development (GO:0016202)	134	10	1.22	+	8.19	7.66e-07	1.21e-05
morphogenesis of a branching structure (GO:0001763)	169	11	1.54	+	7.14	7.64e-07	1.21e-05
neutrophil clearance (GO:0097350)	5	4	0.05	+	87.79	7.83e-07	1.23e-05
homeostasis of number of cells within a tissue (GO:0048873)	30	6	0.27	+	21.95	7.79e-07	1.23e-05
regulation of tumor necrosis factor biosynthetic process (GO:0042534)	30	6	0.27	+	21.95	7.79e-07	1.23e-05
positive regulation of interleukin-6 biosynthetic process (GO:0045410)	15	5	0.14	+	36.58	7.91e-07	1.24e-05
positive regulation of hormone metabolic process (GO:0032352)	15	5	0.14	+	36.58	7.91e-07	1.24e-05
face development (GO:0060324)	50	7	0.46	+	15.36	7.91e-07	1.24e-05
positive regulation of cytokine-mediated signaling pathway (GO:0001961)	50	7	0.46	+	15.36	7.91e-07	1.24e-05
response to axon injury (GO:0048678)	50	7	0.46	+	15.36	7.91e-07	1.24e-05
positive regulation of macrophage differentiation (GO:0045651)	15	5	0.14	+	36.58	7.91e-07	1.25e-05
blood coagulation (GO:0007596)	292	14	2.66	+	5.26	7.97e-07	1.25e-05
defense response to Gram-positive bacterium (GO:0050830)	103	9	0.94	+	9.59	8.15e-07	1.27e-05
regulation of T cell mediated immunity (GO:0002709)	75	8	0.68	+	11.71	8.44e-07	1.32e-05
positive regulation of cell cycle process (GO:0090068)	294	14	2.68	+	5.23	8.61e-07	1.34e-05
coagulation (GO:0050817)	294	14	2.68	+	5.23	8.61e-07	1.34e-05
muscle organ development (GO:0007517)	294	14	2.68	+	5.23	8.61e-07	1.34e-05
platelet activation (GO:0030168)	136	10	1.24	+	8.07	8.7e-07	1.35e-05
negative regulation of peptide secretion (GO:0002792)	136	10	1.24	+	8.07	8.7e-07	1.35e-05
response to nicotine (GO:0035094)	51	7	0.46	+	15.06	8.93e-07	1.38e-05
cytokine secretion (GO:0050663)	51	7	0.46	+	15.06	8.93e-07	1.39e-05
regulation of bone remodeling (GO:0046850)	51	7	0.46	+	15.06	8.93e-07	1.39e-05
blood vessel remodeling (GO:0001974)	31	6	0.28	+	21.24	9.23e-07	1.43e-05
regulation of type 2 immune response (GO:0002828)	31	6	0.28	+	21.24	9.23e-07	1.43e-05
mammary gland duct morphogenesis (GO:0060603)	31	6	0.28	+	21.24	9.23e-07	1.43e-05
negative regulation of ossification (GO:0030279)	76	8	0.69	+	11.55	9.25e-07	1.43e-05
regulation of muscle tissue development (GO:1901861)	137	10	1.25	+	8.01	9.26e-07	1.43e-05
extracellular matrix organization (GO:0030198)	342	15	3.12	+	4.81	9.32e-07	1.44e-05
regulation of postsynapse organization (GO:0099175)	105	9	0.96	+	9.41	9.47e-07	1.46e-05
inner ear morphogenesis (GO:0042472)	105	9	0.96	+	9.41	9.47e-07	1.46e-05
hemostasis (GO:0007599)	297	14	2.71	+	5.17	9.67e-07	1.48e-05
extracellular structure organization (GO:0043062)	343	15	3.13	+	4.8	9.66e-07	1.48e-05
regulation of muscle organ development (GO:0048634)	138	10	1.26	+	7.95	9.86e-07	1.51e-05
response to ischemia (GO:0002931)	52	7	0.47	+	14.77	1.01e-06	1.54e-05
regulation of chemokine biosynthetic process (GO:0045073)	16	5	0.15	+	34.29	1.03e-06	1.57e-05
positive regulation of execution phase of apoptosis (GO:1900119)	16	5	0.15	+	34.29	1.03e-06	1.57e-05
positive regulation of glial cell proliferation (GO:0060252)	16	5	0.15	+	34.29	1.03e-06	1.58e-05
regulation of hepatocyte proliferation (GO:2000345)	16	5	0.15	+	34.29	1.03e-06	1.58e-05
response to endoplasmic reticulum stress (GO:0034976)	255	13	2.32	+	5.59	1.04e-06	1.58e-05
peptide transport (GO:0015833)	1555	35	14.17	+	2.47	1.04e-06	1.59e-05
cellular response to DNA damage stimulus (GO:0006974)	781	23	7.12	+	3.23	1.07e-06	1.63e-05
positive regulation of lymphocyte mediated immunity (GO:0002708)	107	9	0.98	+	9.23	1.1e-06	1.67e-05
response to osmotic stress (GO:0006970)	78	8	0.71	+	11.26	1.11e-06	1.68e-05
regulation of interleukin-10 production (GO:0032653)	53	7	0.48	+	14.49	1.13e-06	1.71e-05
cellular response to toxic substance (GO:0097237)	216	12	1.97	+	6.1	1.17e-06	1.77e-05
negative regulation of inflammatory response (GO:0050728)	141	10	1.28	+	7.78	1.18e-06	1.79e-05
response to organophosphorus (GO:0046683)	141	10	1.28	+	7.78	1.18e-06	1.79e-05
anterior/posterior pattern specification (GO:0009952)	217	12	1.98	+	6.07	1.22e-06	1.85e-05
cellular response to starvation (GO:0009267)	178	11	1.62	+	6.78	1.24e-06	1.87e-05
response to UV (GO:0009411)	142	10	1.29	+	7.73	1.26e-06	1.9e-05
positive regulation of neural precursor cell proliferation (GO:2000179)	54	7	0.49	+	14.23	1.27e-06	1.91e-05
regulation of signaling receptor activity (GO:0010469)	179	11	1.63	+	6.74	1.3e-06	1.96e-05
mitotic cell cycle process (GO:1903047)	614	20	5.59	+	3.57	1.3e-06	1.96e-05
positive regulation of amyloid-beta formation (GO:1902004)	17	5	0.15	+	32.28	1.32e-06	1.99e-05
regulation of cardiac muscle tissue development (GO:0055024)	80	8	0.73	+	10.97	1.32e-06	1.99e-05
embryonic heart tube development (GO:0035050)	80	8	0.73	+	10.97	1.32e-06	1.99e-05
negative regulation of intracellular signal transduction (GO:1902532)	505	18	4.6	+	3.91	1.34e-06	2.01e-05
positive regulation of interleukin-8 production (GO:0032757)	55	7	0.5	+	13.97	1.42e-06	2.12e-05
response to gamma radiation (GO:0010332)	55	7	0.5	+	13.97	1.42e-06	2.12e-05
amide transport (GO:0042886)	1589	35	14.48	+	2.42	1.42e-06	2.12e-05
cellular response to UV (GO:0034644)	81	8	0.74	+	10.84	1.44e-06	2.15e-05
response to fluid shear stress (GO:0034405)	34	6	0.31	+	19.37	1.49e-06	2.22e-05
regulation of amyloid precursor protein catabolic process (GO:1902991)	34	6	0.31	+	19.37	1.49e-06	2.22e-05
regulation of calcium ion transport (GO:0051924)	264	13	2.41	+	5.4	1.5e-06	2.24e-05
peptide secretion (GO:0002790)	182	11	1.66	+	6.63	1.52e-06	2.25e-05
negative regulation of protein transport (GO:0051224)	182	11	1.66	+	6.63	1.52e-06	2.26e-05
regulation of JNK cascade (GO:0046328)	182	11	1.66	+	6.63	1.52e-06	2.26e-05
positive regulation of chromatin organization (GO:1905269)	112	9	1.02	+	8.82	1.56e-06	2.32e-05
positive regulation of lipid biosynthetic process (GO:0046889)	82	8	0.75	+	10.71	1.57e-06	2.33e-05
response to glucocorticoid (GO:0051384)	146	10	1.33	+	7.52	1.59e-06	2.36e-05
membrane protein intracellular domain proteolysis (GO:0031293)	18	5	0.16	+	30.48	1.68e-06	2.48e-05
regulation of microglial cell activation (GO:1903978)	18	5	0.16	+	30.48	1.68e-06	2.48e-05
nervous system process (GO:0050877)	1398	32	12.74	+	2.51	1.68e-06	2.48e-05
negative regulation of interferon-gamma production (GO:0032689)	35	6	0.32	+	18.81	1.73e-06	2.55e-05
response to starvation (GO:0042594)	225	12	2.05	+	5.85	1.75e-06	2.58e-05
connective tissue development (GO:0061448)	225	12	2.05	+	5.85	1.75e-06	2.58e-05
positive regulation of DNA binding (GO:0043388)	57	7	0.52	+	13.48	1.76e-06	2.59e-05
cell cycle (GO:0007049)	1331	31	12.13	+	2.56	1.76e-06	2.59e-05
cell cycle process (GO:0022402)	995	26	9.07	+	2.87	1.78e-06	2.62e-05
negative regulation of T cell activation (GO:0050868)	114	9	1.04	+	8.66	1.79e-06	2.63e-05
negative regulation of establishment of protein localization (GO:1904950)	186	11	1.69	+	6.49	1.85e-06	2.72e-05
cellular response to peptide hormone stimulus (GO:0071375)	270	13	2.46	+	5.28	1.91e-06	2.79e-05
regulation of extent of cell growth (GO:0061387)	115	9	1.05	+	8.59	1.92e-06	2.8e-05
positive regulation of protein catabolic process (GO:0045732)	227	12	2.07	+	5.8	1.91e-06	2.8e-05
regulation of superoxide metabolic process (GO:0090322)	36	6	0.33	+	18.29	2.01e-06	2.92e-05
limb morphogenesis (GO:0035108)	150	10	1.37	+	7.32	2.01e-06	2.92e-05
appendage morphogenesis (GO:0035107)	150	10	1.37	+	7.32	2.01e-06	2.92e-05
learning (GO:0007612)	150	10	1.37	+	7.32	2.01e-06	2.92e-05
macrophage proliferation (GO:0061517)	7	4	0.06	+	62.71	2.02e-06	2.93e-05
regulation of calcidiol 1-monooxygenase activity (GO:0060558)	7	4	0.06	+	62.71	2.02e-06	2.93e-05
hippocampus development (GO:0021766)	85	8	0.77	+	10.33	2.02e-06	2.93e-05
ephrin receptor signaling pathway (GO:0048013)	85	8	0.77	+	10.33	2.02e-06	2.93e-05
negative regulation of neuron projection development (GO:0010977)	150	10	1.37	+	7.32	2.01e-06	2.93e-05
microglial cell proliferation (GO:0061518)	7	4	0.06	+	62.71	2.02e-06	2.94e-05
cardiocyte differentiation (GO:0035051)	116	9	1.06	+	8.51	2.05e-06	2.97e-05
regulation of interleukin-8 biosynthetic process (GO:0045414)	19	5	0.17	+	28.88	2.11e-06	3.04e-05
platelet formation (GO:0030220)	19	5	0.17	+	28.88	2.11e-06	3.04e-05
protein stabilization (GO:0050821)	189	11	1.72	+	6.39	2.15e-06	3.1e-05
response to fungus (GO:0009620)	59	7	0.54	+	13.02	2.18e-06	3.14e-05
regulation of small GTPase mediated signal transduction (GO:0051056)	320	14	2.92	+	4.8	2.24e-06	3.22e-05
protein autophosphorylation (GO:0046777)	190	11	1.73	+	6.35	2.26e-06	3.25e-05
positive regulation of interleukin-12 production (GO:0032735)	37	6	0.34	+	17.8	2.31e-06	3.33e-05
regulation of mitotic cell cycle phase transition (GO:1901990)	420	16	3.83	+	4.18	2.35e-06	3.38e-05
artery development (GO:0060840)	87	8	0.79	+	10.09	2.37e-06	3.4e-05
negative regulation of immune response (GO:0050777)	153	10	1.39	+	7.17	2.37e-06	3.4e-05
telencephalon cell migration (GO:0022029)	60	7	0.55	+	12.8	2.41e-06	3.46e-05
regulation of chromosome organization (GO:0033044)	371	15	3.38	+	4.44	2.45e-06	3.51e-05
cellular response to antibiotic (GO:0071236)	119	9	1.08	+	8.3	2.5e-06	3.57e-05
activation of MAPK activity (GO:0000187)	154	10	1.4	+	7.13	2.51e-06	3.58e-05
positive regulation of phosphatidylinositol 3-kinase signaling (GO:0014068)	88	8	0.8	+	9.98	2.57e-06	3.66e-05
positive regulation of smooth muscle cell proliferation (GO:0048661)	88	8	0.8	+	9.98	2.57e-06	3.66e-05
regulation of vascular endothelial cell proliferation (GO:1905562)	20	5	0.18	+	27.44	2.61e-06	3.72e-05
platelet morphogenesis (GO:0036344)	20	5	0.18	+	27.44	2.61e-06	3.72e-05
mRNA transcription by RNA polymerase II (GO:0042789)	20	5	0.18	+	27.44	2.61e-06	3.72e-05
negative regulation of alpha-beta T cell activation (GO:0046636)	38	6	0.35	+	17.33	2.66e-06	3.77e-05
receptor signaling pathway via JAK-STAT (GO:0007259)	38	6	0.35	+	17.33	2.66e-06	3.78e-05
positive regulation of alpha-beta T cell activation (GO:0046635)	61	7	0.56	+	12.59	2.67e-06	3.78e-05
positive regulation of intrinsic apoptotic signaling pathway (GO:2001244)	61	7	0.56	+	12.59	2.67e-06	3.79e-05
regulation of response to endoplasmic reticulum stress (GO:1905897)	89	8	0.81	+	9.86	2.78e-06	3.93e-05
regulation of dendrite development (GO:0050773)	156	10	1.42	+	7.03	2.79e-06	3.95e-05
artery morphogenesis (GO:0048844)	62	7	0.56	+	12.39	2.95e-06	4.17e-05
negative regulation of amyloid-beta clearance (GO:1900222)	8	4	0.07	+	54.87	3.01e-06	4.25e-05
positive regulation of IRE1-mediated unfolded protein response (GO:1903896)	8	4	0.07	+	54.87	3.01e-06	4.25e-05
B cell apoptotic process (GO:0001783)	8	4	0.07	+	54.87	3.01e-06	4.26e-05
camera-type eye morphogenesis (GO:0048593)	122	9	1.11	+	8.1	3.03e-06	4.26e-05
cerebral cortex development (GO:0021987)	122	9	1.11	+	8.1	3.03e-06	4.26e-05
regulation of NMDA receptor activity (GO:2000310)	39	6	0.36	+	16.88	3.04e-06	4.28e-05
receptor signaling pathway via STAT (GO:0097696)	39	6	0.36	+	16.88	3.04e-06	4.28e-05
developmental maturation (GO:0021700)	238	12	2.17	+	5.53	3.05e-06	4.28e-05
transcription, DNA-templated (GO:0006351)	651	20	5.93	+	3.37	3.08e-06	4.32e-05
cellular component biogenesis (GO:0044085)	2653	48	24.17	+	1.99	3.09e-06	4.33e-05
morphogenesis of a branching epithelium (GO:0061138)	158	10	1.44	+	6.95	3.11e-06	4.36e-05
nucleic acid-templated transcription (GO:0097659)	652	20	5.94	+	3.37	3.15e-06	4.4e-05
positive regulation of lymphocyte chemotaxis (GO:0140131)	21	5	0.19	+	26.13	3.21e-06	4.49e-05
cardiac muscle tissue development (GO:0048738)	159	10	1.45	+	6.9	3.28e-06	4.58e-05
synapse organization (GO:0050808)	285	13	2.6	+	5.01	3.37e-06	4.7e-05
positive regulation of sprouting angiogenesis (GO:1903672)	40	6	0.36	+	16.46	3.48e-06	4.84e-05
positive regulation of axonogenesis (GO:0050772)	92	8	0.84	+	9.54	3.49e-06	4.86e-05
activation of cysteine-type endopeptidase activity involved in apoptotic process (GO:0006919)	93	8	0.85	+	9.44	3.76e-06	5.23e-05
negative regulation of transferase activity (GO:0051348)	288	13	2.62	+	4.95	3.76e-06	5.23e-05
response to corticosteroid (GO:0031960)	162	10	1.48	+	6.77	3.84e-06	5.33e-05
cytoskeleton organization (GO:0007010)	1106	27	10.08	+	2.68	3.84e-06	5.33e-05
gastrulation (GO:0007369)	162	10	1.48	+	6.77	3.84e-06	5.34e-05
release of cytochrome c from mitochondria (GO:0001836)	22	5	0.2	+	24.94	3.91e-06	5.41e-05
negative regulation of tissue remodeling (GO:0034104)	22	5	0.2	+	24.94	3.91e-06	5.42e-05
T cell lineage commitment (GO:0002360)	22	5	0.2	+	24.94	3.91e-06	5.42e-05
apoptotic cell clearance (GO:0043277)	41	6	0.37	+	16.06	3.95e-06	5.46e-05
regulation of T cell proliferation (GO:0042129)	163	10	1.49	+	6.73	4.05e-06	5.59e-05
RNA biosynthetic process (GO:0032774)	664	20	6.05	+	3.31	4.1e-06	5.66e-05
positive regulation of stress-activated MAPK cascade (GO:0032874)	164	10	1.49	+	6.69	4.26e-06	5.87e-05
marginal zone B cell differentiation (GO:0002315)	9	4	0.08	+	48.77	4.32e-06	5.95e-05
regulation of vitamin D biosynthetic process (GO:0060556)	9	4	0.08	+	48.77	4.32e-06	5.95e-05
regulation of DNA-templated transcription, initiation (GO:2000142)	42	6	0.38	+	15.68	4.49e-06	6.15e-05
regulation of hormone metabolic process (GO:0032350)	42	6	0.38	+	15.68	4.49e-06	6.15e-05
monocyte chemotaxis (GO:0002548)	42	6	0.38	+	15.68	4.49e-06	6.16e-05
cell-substrate junction assembly (GO:0007044)	42	6	0.38	+	15.68	4.49e-06	6.16e-05
negative regulation of growth (GO:0045926)	248	12	2.26	+	5.31	4.56e-06	6.25e-05
regulation of organ growth (GO:0046620)	96	8	0.87	+	9.15	4.69e-06	6.42e-05
regulation of glutamate receptor signaling pathway (GO:1900449)	67	7	0.61	+	11.47	4.73e-06	6.45e-05
somatic stem cell population maintenance (GO:0035019)	67	7	0.61	+	11.47	4.73e-06	6.45e-05
response to unfolded protein (GO:0006986)	166	10	1.51	+	6.61	4.72e-06	6.45e-05
regulation of interleukin-6 biosynthetic process (GO:0045408)	23	5	0.21	+	23.86	4.73e-06	6.46e-05
negative regulation of cytokine secretion (GO:0050710)	67	7	0.61	+	11.47	4.73e-06	6.46e-05
negative regulation of kinase activity (GO:0033673)	249	12	2.27	+	5.29	4.74e-06	6.46e-05
negative regulation of transmembrane receptor protein serine/threonine kinase signaling pathway (GO:0090101)	130	9	1.18	+	7.6	4.93e-06	6.71e-05
positive regulation of protein acetylation (GO:1901985)	43	6	0.39	+	15.31	5.07e-06	6.88e-05
cellular response to vascular endothelial growth factor stimulus (GO:0035924)	43	6	0.39	+	15.31	5.07e-06	6.88e-05
mammary gland morphogenesis (GO:0060443)	43	6	0.39	+	15.31	5.07e-06	6.89e-05
regulation of cellular senescence (GO:2000772)	43	6	0.39	+	15.31	5.07e-06	6.89e-05
mammary gland development (GO:0030879)	131	9	1.19	+	7.54	5.23e-06	7.09e-05
antigen processing and presentation of exogenous peptide antigen via MHC class II (GO:0019886)	98	8	0.89	+	8.96	5.41e-06	7.31e-05
transforming growth factor beta receptor signaling pathway (GO:0007179)	98	8	0.89	+	8.96	5.41e-06	7.32e-05
regulation of chromatin organization (GO:1902275)	210	11	1.91	+	5.75	5.62e-06	7.59e-05
negative regulation of ERK1 and ERK2 cascade (GO:0070373)	69	7	0.63	+	11.13	5.66e-06	7.64e-05
cell junction assembly (GO:0034329)	170	10	1.55	+	6.46	5.76e-06	7.76e-05
negative regulation of MAPK cascade (GO:0043409)	170	10	1.55	+	6.46	5.76e-06	7.77e-05
cellular response to X-ray (GO:0071481)	10	4	0.09	+	43.9	6.01e-06	8.08e-05
tumor necrosis factor superfamily cytokine production (GO:0071706)	10	4	0.09	+	43.9	6.01e-06	8.09e-05
cellular response to acid chemical (GO:0071229)	212	11	1.93	+	5.69	6.12e-06	8.23e-05
gonad development (GO:0008406)	212	11	1.93	+	5.69	6.12e-06	8.23e-05
cellular response to hydrogen peroxide (GO:0070301)	70	7	0.64	+	10.97	6.18e-06	8.3e-05
antigen processing and presentation of peptide antigen via MHC class II (GO:0002495)	100	8	0.91	+	8.78	6.21e-06	8.33e-05
regulation of cell cycle phase transition (GO:1901987)	456	16	4.16	+	3.85	6.44e-06	8.61e-05
lung morphogenesis (GO:0060425)	45	6	0.41	+	14.63	6.44e-06	8.62e-05
autonomic nervous system development (GO:0048483)	45	6	0.41	+	14.63	6.44e-06	8.62e-05
male gonad development (GO:0008584)	135	9	1.23	+	7.32	6.58e-06	8.79e-05
negative regulation of translation (GO:0017148)	135	9	1.23	+	7.32	6.58e-06	8.8e-05
peptidyl-amino acid modification (GO:0018193)	874	23	7.96	+	2.89	6.65e-06	8.87e-05
lung development (GO:0030324)	173	10	1.58	+	6.34	6.66e-06	8.88e-05
negative regulation of cellular catabolic process (GO:0031330)	258	12	2.35	+	5.1	6.7e-06	8.92e-05
embryonic heart tube morphogenesis (GO:0003143)	71	7	0.65	+	10.82	6.74e-06	8.97e-05
positive regulation of JNK cascade (GO:0046330)	136	9	1.24	+	7.26	6.97e-06	9.25e-05
development of primary male sexual characteristics (GO:0046546)	136	9	1.24	+	7.26	6.97e-06	9.26e-05
peptidyl-serine phosphorylation (GO:0018105)	174	10	1.59	+	6.31	6.99e-06	9.28e-05
regulation of actin filament bundle assembly (GO:0032231)	102	8	0.93	+	8.61	7.12e-06	9.44e-05
antigen processing and presentation of peptide or polysaccharide antigen via MHC class II (GO:0002504)	102	8	0.93	+	8.61	7.12e-06	9.45e-05
positive regulation of alpha-beta T cell differentiation (GO:0046638)	46	6	0.42	+	14.31	7.22e-06	9.54e-05
positive regulation of GTPase activity (GO:0043547)	407	15	3.71	+	4.04	7.21e-06	9.54e-05
negative regulation of fat cell differentiation (GO:0045599)	46	6	0.42	+	14.31	7.22e-06	9.55e-05
regulation of nitric-oxide synthase activity (GO:0050999)	46	6	0.42	+	14.31	7.22e-06	9.55e-05
pancreas development (GO:0031016)	72	7	0.66	+	10.67	7.34e-06	9.67e-05
regulation of protein acetylation (GO:1901983)	72	7	0.66	+	10.67	7.34e-06	9.68e-05
positive regulation of response to wounding (GO:1903036)	72	7	0.66	+	10.67	7.34e-06	9.69e-05
regulation of peptide hormone secretion (GO:0090276)	217	11	1.98	+	5.56	7.56e-06	9.95e-05
regulation of potassium ion transport (GO:0043266)	103	8	0.94	+	8.52	7.62e-06	0.0001
regulation of calcium ion transport into cytosol (GO:0010522)	103	8	0.94	+	8.52	7.62e-06	0.0001
antigen processing and presentation of exogenous peptide antigen (GO:0002478)	176	10	1.6	+	6.24	7.69e-06	0.000101
development of primary sexual characteristics (GO:0045137)	218	11	1.99	+	5.54	7.88e-06	0.000103
outflow tract morphogenesis (GO:0003151)	73	7	0.67	+	10.52	7.98e-06	0.000104
regulation of astrocyte differentiation (GO:0048710)	26	5	0.24	+	21.1	8e-06	0.000105
T cell differentiation in thymus (GO:0033077)	47	6	0.43	+	14.01	8.08e-06	0.000105
neuron apoptotic process (GO:0051402)	47	6	0.43	+	14.01	8.08e-06	0.000105
positive regulation of potassium ion transport (GO:0043268)	47	6	0.43	+	14.01	8.08e-06	0.000105
bone remodeling (GO:0046849)	47	6	0.43	+	14.01	8.08e-06	0.000105
acute inflammatory response (GO:0002526)	73	7	0.67	+	10.52	7.98e-06	0.000105
animal organ regeneration (GO:0031100)	73	7	0.67	+	10.52	7.98e-06	0.000105
respiratory tube development (GO:0030323)	177	10	1.61	+	6.2	8.06e-06	0.000105
ossification (GO:0001503)	263	12	2.4	+	5.01	8.06e-06	0.000105
cellular response to lipoteichoic acid (GO:0071223)	11	4	0.1	+	39.91	8.13e-06	0.000106
leukocyte aggregation (GO:0070486)	11	4	0.1	+	39.91	8.13e-06	0.000106
response to lipoteichoic acid (GO:0070391)	11	4	0.1	+	39.91	8.13e-06	0.000106
positive regulation of hormone biosynthetic process (GO:0046886)	11	4	0.1	+	39.91	8.13e-06	0.000106
cellular protein localization (GO:0034613)	1635	34	14.9	+	2.28	8.46e-06	0.00011
nitrogen compound transport (GO:0071705)	1859	37	16.94	+	2.18	8.75e-06	0.000113
cellular macromolecule localization (GO:0070727)	1643	34	14.97	+	2.27	8.93e-06	0.000116
mononuclear cell migration (GO:0071674)	48	6	0.44	+	13.72	9.02e-06	0.000117
positive regulation of endocytosis (GO:0045807)	106	8	0.97	+	8.28	9.28e-06	0.00012
regulation of macrophage chemotaxis (GO:0010758)	27	5	0.25	+	20.32	9.41e-06	0.000121
cellular response to inorganic substance (GO:0071241)	223	11	2.03	+	5.41	9.66e-06	0.000125
negative regulation of developmental growth (GO:0048640)	107	8	0.98	+	8.21	9.9e-06	0.000128
lymphocyte chemotaxis (GO:0048247)	49	6	0.45	+	13.44	1.01e-05	0.000129
antigen processing and presentation (GO:0019882)	224	11	2.04	+	5.39	1.01e-05	0.000129
positive regulation of dendrite development (GO:1900006)	76	7	0.69	+	10.11	1.02e-05	0.000131
positive regulation of small molecule metabolic process (GO:0062013)	143	9	1.3	+	6.91	1.02e-05	0.000131
protein transport (GO:0015031)	1525	32	13.9	+	2.3	1.03e-05	0.000132
antigen processing and presentation of exogenous antigen (GO:0019884)	183	10	1.67	+	6	1.06e-05	0.000136
mammary gland epithelial cell proliferation (GO:0033598)	12	4	0.11	+	36.58	1.08e-05	0.000138
positive regulation of astrocyte differentiation (GO:0048711)	12	4	0.11	+	36.58	1.08e-05	0.000138
positive regulation of monooxygenase activity (GO:0032770)	28	5	0.26	+	19.6	1.1e-05	0.000141
regulation of amyloid-beta formation (GO:1902003)	28	5	0.26	+	19.6	1.1e-05	0.000141
response to estrogen (GO:0043627)	77	7	0.7	+	9.98	1.1e-05	0.000141
regulation of telomerase activity (GO:0051972)	50	6	0.46	+	13.17	1.12e-05	0.000143
regulation of cell aging (GO:0090342)	50	6	0.46	+	13.17	1.12e-05	0.000143
regulation of system process (GO:0044057)	594	18	5.41	+	3.33	1.18e-05	0.00015
modification of morphology or physiology of other organism involved in symbiotic interaction (GO:0051817)	110	8	1	+	7.98	1.2e-05	0.000152
regulation of oxidoreductase activity (GO:0051341)	110	8	1	+	7.98	1.2e-05	0.000152
cell cycle arrest (GO:0007050)	146	9	1.33	+	6.76	1.19e-05	0.000152
negative regulation of response to external stimulus (GO:0032102)	373	14	3.4	+	4.12	1.21e-05	0.000153
regulation of Wnt signaling pathway (GO:0030111)	373	14	3.4	+	4.12	1.21e-05	0.000153
response to ammonium ion (GO:0060359)	186	10	1.69	+	5.9	1.22e-05	0.000154
negative regulation of protein kinase activity (GO:0006469)	229	11	2.09	+	5.27	1.23e-05	0.000155
regulation of cell size (GO:0008361)	187	10	1.7	+	5.87	1.27e-05	0.000161
negative regulation of osteoclast differentiation (GO:0045671)	29	5	0.26	+	18.92	1.28e-05	0.000162
positive regulation of erythrocyte differentiation (GO:0045648)	29	5	0.26	+	18.92	1.28e-05	0.000162
negative regulation of fibroblast proliferation (GO:0048147)	29	5	0.26	+	18.92	1.28e-05	0.000162
regulation of hormone biosynthetic process (GO:0046885)	29	5	0.26	+	18.92	1.28e-05	0.000162
interaction with symbiont (GO:0051702)	79	7	0.72	+	9.72	1.29e-05	0.000163
posttranscriptional regulation of gene expression (GO:0010608)	540	17	4.92	+	3.45	1.3e-05	0.000163
negative regulation of apoptotic signaling pathway (GO:2001234)	231	11	2.1	+	5.23	1.32e-05	0.000167
cellular response to light stimulus (GO:0071482)	112	8	1.02	+	7.84	1.35e-05	0.00017
response to retinoic acid (GO:0032526)	112	8	1.02	+	7.84	1.35e-05	0.00017
neural crest cell migration (GO:0001755)	52	6	0.47	+	12.66	1.37e-05	0.000172
positive regulation of interleukin-1 beta production (GO:0032731)	52	6	0.47	+	12.66	1.37e-05	0.000172
aorta development (GO:0035904)	52	6	0.47	+	12.66	1.37e-05	0.000172
response to topologically incorrect protein (GO:0035966)	189	10	1.72	+	5.81	1.39e-05	0.000174
positive regulation of chemokine biosynthetic process (GO:0045080)	13	4	0.12	+	33.77	1.4e-05	0.000175
regulation of vitamin metabolic process (GO:0030656)	13	4	0.12	+	33.77	1.4e-05	0.000175
regulation of IRE1-mediated unfolded protein response (GO:1903894)	13	4	0.12	+	33.77	1.4e-05	0.000175
positive regulation of response to macrophage colony-stimulating factor (GO:1903971)	3	3	0.03	+	> 100	1.42e-05	0.000177
positive regulation of calcidiol 1-monooxygenase activity (GO:0060559)	3	3	0.03	+	> 100	1.42e-05	0.000177
positive regulation of vitamin D biosynthetic process (GO:0060557)	3	3	0.03	+	> 100	1.42e-05	0.000177
positive regulation of cellular response to macrophage colony-stimulating factor stimulus (GO:1903974)	3	3	0.03	+	> 100	1.42e-05	0.000178
negative regulation of blood vessel morphogenesis (GO:2000181)	113	8	1.03	+	7.77	1.44e-05	0.000179
skin development (GO:0043588)	380	14	3.46	+	4.04	1.47e-05	0.000183
T cell migration (GO:0072678)	30	5	0.27	+	18.29	1.48e-05	0.000185
cranial nerve development (GO:0021545)	53	6	0.48	+	12.42	1.52e-05	0.000188
central nervous system neuron differentiation (GO:0021953)	191	10	1.74	+	5.75	1.51e-05	0.000188
regulation of membrane potential (GO:0042391)	435	15	3.96	+	3.78	1.54e-05	0.000191
DNA geometric change (GO:0032392)	115	8	1.05	+	7.63	1.62e-05	0.000201
negative regulation of cellular amide metabolic process (GO:0034249)	152	9	1.39	+	6.5	1.62e-05	0.000201
regulation of histone acetylation (GO:0035065)	54	6	0.49	+	12.19	1.67e-05	0.000206
regulation of myeloid leukocyte mediated immunity (GO:0002886)	54	6	0.49	+	12.19	1.67e-05	0.000206
positive regulation of cell-matrix adhesion (GO:0001954)	54	6	0.49	+	12.19	1.67e-05	0.000207
regulation of transcription regulatory region DNA binding (GO:2000677)	54	6	0.49	+	12.19	1.67e-05	0.000207
columnar/cuboidal epithelial cell development (GO:0002066)	54	6	0.49	+	12.19	1.67e-05	0.000207
T cell costimulation (GO:0031295)	54	6	0.49	+	12.19	1.67e-05	0.000207
dendritic cell differentiation (GO:0097028)	31	5	0.28	+	17.7	1.71e-05	0.00021
neuroblast proliferation (GO:0007405)	31	5	0.28	+	17.7	1.71e-05	0.000211
positive regulation of histone acetylation (GO:0035066)	31	5	0.28	+	17.7	1.71e-05	0.000211
formation of primary germ layer (GO:0001704)	116	8	1.06	+	7.57	1.72e-05	0.000211
response to alkaloid (GO:0043279)	116	8	1.06	+	7.57	1.72e-05	0.000211
regulation of epithelial to mesenchymal transition (GO:0010717)	83	7	0.76	+	9.26	1.74e-05	0.000214
response to peptidoglycan (GO:0032494)	14	4	0.13	+	31.35	1.79e-05	0.000219
macrophage chemotaxis (GO:0048246)	14	4	0.13	+	31.35	1.79e-05	0.000219
T cell chemotaxis (GO:0010818)	14	4	0.13	+	31.35	1.79e-05	0.000219
antigen processing and presentation of peptide antigen (GO:0048002)	195	10	1.78	+	5.63	1.8e-05	0.000219
receptor-mediated endocytosis (GO:0006898)	239	11	2.18	+	5.05	1.79e-05	0.000219
regulation of small molecule metabolic process (GO:0062012)	441	15	4.02	+	3.73	1.8e-05	0.000219
cellular response to metal ion (GO:0071248)	195	10	1.78	+	5.63	1.8e-05	0.00022
lymphocyte costimulation (GO:0031294)	55	6	0.5	+	11.97	1.84e-05	0.000224
regulation of immunoglobulin mediated immune response (GO:0002889)	55	6	0.5	+	11.97	1.84e-05	0.000224
ventricular cardiac muscle tissue development (GO:0003229)	55	6	0.5	+	11.97	1.84e-05	0.000224
regulation of B cell mediated immunity (GO:0002712)	55	6	0.5	+	11.97	1.84e-05	0.000224
regulation of cellular component size (GO:0032535)	388	14	3.54	+	3.96	1.84e-05	0.000225
positive regulation of ossification (GO:0045778)	84	7	0.77	+	9.15	1.87e-05	0.000227
regulation of cellular extravasation (GO:0002691)	32	5	0.29	+	17.15	1.96e-05	0.000237
regulation of transcription initiation from RNA polymerase II promoter (GO:0060260)	32	5	0.29	+	17.15	1.96e-05	0.000238
signal transduction in absence of ligand (GO:0038034)	32	5	0.29	+	17.15	1.96e-05	0.000238
positive regulation of DNA-templated transcription, initiation (GO:2000144)	32	5	0.29	+	17.15	1.96e-05	0.000238
regulation of vascular endothelial growth factor production (GO:0010574)	32	5	0.29	+	17.15	1.96e-05	0.000238
extrinsic apoptotic signaling pathway in absence of ligand (GO:0097192)	32	5	0.29	+	17.15	1.96e-05	0.000238
regulation of T cell cytokine production (GO:0002724)	32	5	0.29	+	17.15	1.96e-05	0.000238
regulation of I-kappaB kinase/NF-kappaB signaling (GO:0043122)	242	11	2.21	+	4.99	2e-05	0.000242
regulation of epidermis development (GO:0045682)	85	7	0.77	+	9.04	2.01e-05	0.000243
neuron death (GO:0070997)	56	6	0.51	+	11.76	2.02e-05	0.000244
peptidyl-serine modification (GO:0018209)	198	10	1.8	+	5.54	2.04e-05	0.000245
regulation of G1/S transition of mitotic cell cycle (GO:2000045)	157	9	1.43	+	6.29	2.07e-05	0.000249
regulation of hematopoietic progenitor cell differentiation (GO:1901532)	86	7	0.78	+	8.93	2.16e-05	0.00026
male sex differentiation (GO:0046661)	158	9	1.44	+	6.25	2.17e-05	0.000261
cellular process involved in reproduction in multicellular organism (GO:0022412)	342	13	3.12	+	4.17	2.19e-05	0.000263
negative regulation of reactive oxygen species metabolic process (GO:2000378)	57	6	0.52	+	11.55	2.22e-05	0.000266
regulation of interleukin-12 production (GO:0032655)	57	6	0.52	+	11.55	2.22e-05	0.000266
positive regulation of nitric-oxide synthase biosynthetic process (GO:0051770)	15	4	0.14	+	29.26	2.25e-05	0.000268
positive regulation of vascular endothelial cell proliferation (GO:1905564)	15	4	0.14	+	29.26	2.25e-05	0.000268
positive regulation of interleukin-8 biosynthetic process (GO:0045416)	15	4	0.14	+	29.26	2.25e-05	0.000269
regulation of chemokine (C-X-C motif) ligand 2 production (GO:2000341)	15	4	0.14	+	29.26	2.25e-05	0.000269
olfactory bulb development (GO:0021772)	33	5	0.3	+	16.63	2.24e-05	0.000269
regulation of keratinocyte proliferation (GO:0010837)	33	5	0.3	+	16.63	2.24e-05	0.000269
positive regulation of supramolecular fiber organization (GO:1902905)	202	10	1.84	+	5.43	2.4e-05	0.000286
muscle cell differentiation (GO:0042692)	247	11	2.25	+	4.89	2.4e-05	0.000286
apoptotic mitochondrial changes (GO:0008637)	58	6	0.53	+	11.35	2.43e-05	0.00029
microglial cell activation involved in immune response (GO:0002282)	4	3	0.04	+	82.31	2.47e-05	0.000294
astrocyte activation involved in immune response (GO:0002265)	4	3	0.04	+	82.31	2.47e-05	0.000294
supramolecular fiber organization (GO:0097435)	454	15	4.14	+	3.63	2.49e-05	0.000296
positive regulation of peptidyl-lysine acetylation (GO:2000758)	34	5	0.31	+	16.14	2.56e-05	0.000303
intrinsic apoptotic signaling pathway in response to endoplasmic reticulum stress (GO:0070059)	34	5	0.31	+	16.14	2.56e-05	0.000303
negative regulation of exocytosis (GO:0045920)	34	5	0.31	+	16.14	2.56e-05	0.000303
response to iron ion (GO:0010039)	34	5	0.31	+	16.14	2.56e-05	0.000304
negative regulation of tumor necrosis factor production (GO:0032720)	59	6	0.54	+	11.16	2.66e-05	0.000314
mesonephros development (GO:0001823)	89	7	0.81	+	8.63	2.65e-05	0.000314
developmental cell growth (GO:0048588)	89	7	0.81	+	8.63	2.65e-05	0.000314
adherens junction organization (GO:0034332)	89	7	0.81	+	8.63	2.65e-05	0.000314
negative regulation of vasculature development (GO:1901343)	124	8	1.13	+	7.08	2.7e-05	0.000319
positive regulation of autophagy (GO:0010508)	124	8	1.13	+	7.08	2.7e-05	0.000319
regulation of intrinsic apoptotic signaling pathway (GO:2001242)	163	9	1.49	+	6.06	2.74e-05	0.000323
protein secretion (GO:0009306)	163	9	1.49	+	6.06	2.74e-05	0.000323
T cell apoptotic process (GO:0070231)	16	4	0.15	+	27.44	2.79e-05	0.000328
negative regulation of hydrolase activity (GO:0051346)	459	15	4.18	+	3.59	2.81e-05	0.000331
positive regulation of protein binding (GO:0032092)	90	7	0.82	+	8.54	2.84e-05	0.000334
protein localization to organelle (GO:0033365)	762	20	6.94	+	2.88	2.87e-05	0.000336
establishment of protein localization to extracellular region (GO:0035592)	164	9	1.49	+	6.02	2.87e-05	0.000337
olfactory lobe development (GO:0021988)	35	5	0.32	+	15.68	2.9e-05	0.00034
regulation of peptidyl-lysine acetylation (GO:2000756)	60	6	0.55	+	10.97	2.9e-05	0.00034
positive regulation of interleukin-1 production (GO:0032732)	60	6	0.55	+	10.97	2.9e-05	0.00034
nucleobase-containing compound biosynthetic process (GO:0034654)	1100	25	10.02	+	2.49	2.94e-05	0.000345
cell growth (GO:0016049)	91	7	0.83	+	8.44	3.03e-05	0.000355
negative regulation of tumor necrosis factor superfamily cytokine production (GO:1903556)	61	6	0.56	+	10.79	3.16e-05	0.00037
positive regulation of calcium ion transport (GO:0051928)	127	8	1.16	+	6.91	3.18e-05	0.000371
embryonic limb morphogenesis (GO:0030326)	127	8	1.16	+	6.91	3.18e-05	0.000371
embryonic appendage morphogenesis (GO:0035113)	127	8	1.16	+	6.91	3.18e-05	0.000371
positive regulation of telomerase activity (GO:0051973)	36	5	0.33	+	15.24	3.28e-05	0.000382
negative regulation of production of molecular mediator of immune response (GO:0002701)	36	5	0.33	+	15.24	3.28e-05	0.000382
regulation of cell division (GO:0051302)	167	9	1.52	+	5.91	3.28e-05	0.000382
negative regulation of bone remodeling (GO:0046851)	17	4	0.15	+	25.82	3.42e-05	0.000395
positive regulation of humoral immune response (GO:0002922)	17	4	0.15	+	25.82	3.42e-05	0.000395
negative regulation of B cell proliferation (GO:0030889)	17	4	0.15	+	25.82	3.42e-05	0.000396
negative regulation of macrophage activation (GO:0043031)	17	4	0.15	+	25.82	3.42e-05	0.000396
female genitalia development (GO:0030540)	17	4	0.15	+	25.82	3.42e-05	0.000396
negative regulation of DNA-binding transcription factor activity (GO:0043433)	168	9	1.53	+	5.88	3.43e-05	0.000396
long-term synaptic depression (GO:0060292)	17	4	0.15	+	25.82	3.42e-05	0.000397
positive regulation of chemokine secretion (GO:0090197)	17	4	0.15	+	25.82	3.42e-05	0.000397
post-embryonic animal organ development (GO:0048569)	17	4	0.15	+	25.82	3.42e-05	0.000397
positive regulation of membrane protein ectodomain proteolysis (GO:0051044)	17	4	0.15	+	25.82	3.42e-05	0.000397
neuron projection extension (GO:1990138)	62	6	0.56	+	10.62	3.44e-05	0.000397
positive regulation of fat cell differentiation (GO:0045600)	62	6	0.56	+	10.62	3.44e-05	0.000398
regulation of ERBB signaling pathway (GO:1901184)	93	7	0.85	+	8.26	3.46e-05	0.000398
cellular response to unfolded protein (GO:0034620)	129	8	1.18	+	6.81	3.53e-05	0.000406
organic cyclic compound biosynthetic process (GO:1901362)	1321	28	12.04	+	2.33	3.53e-05	0.000406
kidney epithelium development (GO:0072073)	129	8	1.18	+	6.81	3.53e-05	0.000407
cellular localization (GO:0051641)	2411	42	21.97	+	1.91	3.54e-05	0.000407
inflammatory response to antigenic stimulus (GO:0002437)	37	5	0.34	+	14.83	3.69e-05	0.000424
regulation of protein binding (GO:0043393)	213	10	1.94	+	5.15	3.69e-05	0.000424
branching morphogenesis of an epithelial tube (GO:0048754)	130	8	1.18	+	6.75	3.72e-05	0.000427
negative regulation of defense response (GO:0031348)	214	10	1.95	+	5.13	3.83e-05	0.000439
thymocyte apoptotic process (GO:0070242)	5	3	0.05	+	65.85	3.93e-05	0.000448
regulation of cellular response to macrophage colony-stimulating factor stimulus (GO:1903972)	5	3	0.05	+	65.85	3.93e-05	0.000448
regulation of response to macrophage colony-stimulating factor (GO:1903969)	5	3	0.05	+	65.85	3.93e-05	0.000448
protein localization to extracellular region (GO:0071692)	171	9	1.56	+	5.78	3.91e-05	0.000448
regulation of forebrain neuron differentiation (GO:2000977)	5	3	0.05	+	65.85	3.93e-05	0.000449
positive regulation of vitamin metabolic process (GO:0046136)	5	3	0.05	+	65.85	3.93e-05	0.000449
negative regulation of neutrophil activation (GO:1902564)	5	3	0.05	+	65.85	3.93e-05	0.000449
positive regulation of steroid biosynthetic process (GO:0010893)	18	4	0.16	+	24.39	4.15e-05	0.000472
regulation of B cell apoptotic process (GO:0002902)	18	4	0.16	+	24.39	4.15e-05	0.000472
ER-nucleus signaling pathway (GO:0006984)	38	5	0.35	+	14.44	4.15e-05	0.000472
regulation of cell migration involved in sprouting angiogenesis (GO:0090049)	38	5	0.35	+	14.44	4.15e-05	0.000472
regulation of chemokine secretion (GO:0090196)	18	4	0.16	+	24.39	4.15e-05	0.000473
regulation of cell junction assembly (GO:1901888)	96	7	0.87	+	8	4.18e-05	0.000475
cartilage development (GO:0051216)	173	9	1.58	+	5.71	4.27e-05	0.000484
heterocycle biosynthetic process (GO:0018130)	1170	26	10.66	+	2.44	4.33e-05	0.000491
heart looping (GO:0001947)	65	6	0.59	+	10.13	4.41e-05	0.000499
positive regulation of interferon-gamma production (GO:0032729)	65	6	0.59	+	10.13	4.41e-05	0.000499
aromatic compound biosynthetic process (GO:0019438)	1179	26	10.74	+	2.42	4.61e-05	0.000521
adherens junction assembly (GO:0034333)	39	5	0.36	+	14.07	4.65e-05	0.000524
membrane protein proteolysis (GO:0033619)	39	5	0.36	+	14.07	4.65e-05	0.000525
regulation of actin cytoskeleton reorganization (GO:2000249)	39	5	0.36	+	14.07	4.65e-05	0.000525
cellular response to interleukin-1 (GO:0071347)	175	9	1.59	+	5.64	4.64e-05	0.000525
Fc-gamma receptor signaling pathway involved in phagocytosis (GO:0038096)	135	8	1.23	+	6.5	4.8e-05	0.00054
immune response-regulating cell surface receptor signaling pathway involved in phagocytosis (GO:0002433)	135	8	1.23	+	6.5	4.8e-05	0.000541
membrane organization (GO:0061024)	858	21	7.82	+	2.69	4.83e-05	0.000544
regulation of cell cycle G1/S phase transition (GO:1902806)	176	9	1.6	+	5.61	4.84e-05	0.000545
interferon-gamma production (GO:0032609)	19	4	0.17	+	23.1	4.99e-05	0.00056
regulation of nitric-oxide synthase biosynthetic process (GO:0051769)	19	4	0.17	+	23.1	4.99e-05	0.00056
regulation of mammary gland epithelial cell proliferation (GO:0033599)	19	4	0.17	+	23.1	4.99e-05	0.000561
anatomical structure maturation (GO:0071695)	136	8	1.24	+	6.46	5.04e-05	0.000565
regulation of ion transmembrane transporter activity (GO:0032412)	269	11	2.45	+	4.49	5.06e-05	0.000567
regulation of muscle cell apoptotic process (GO:0010660)	67	6	0.61	+	9.83	5.16e-05	0.000577
cellular response to nutrient (GO:0031670)	67	6	0.61	+	9.83	5.16e-05	0.000578
ovulation cycle (GO:0042698)	67	6	0.61	+	9.83	5.16e-05	0.000578
neuron projection organization (GO:0106027)	40	5	0.36	+	13.72	5.19e-05	0.000579
endocrine pancreas development (GO:0031018)	40	5	0.36	+	13.72	5.19e-05	0.000579
spermatogenesis (GO:0007283)	544	16	4.96	+	3.23	5.18e-05	0.000579
positive regulation of potassium ion transmembrane transport (GO:1901381)	40	5	0.36	+	13.72	5.19e-05	0.00058
adaptive immune response based on somatic recombination of immune receptors built from immunoglobulin superfamily domains (GO:0002460)	270	11	2.46	+	4.47	5.22e-05	0.000582
response to carbohydrate (GO:0009743)	178	9	1.62	+	5.55	5.27e-05	0.000586
response to temperature stimulus (GO:0009266)	178	9	1.62	+	5.55	5.27e-05	0.000586
regulation of response to wounding (GO:1903034)	178	9	1.62	+	5.55	5.27e-05	0.000587
import into cell (GO:0098657)	668	18	6.09	+	2.96	5.28e-05	0.000587
Fc receptor mediated stimulatory signaling pathway (GO:0002431)	137	8	1.25	+	6.41	5.29e-05	0.000588
endocytosis (GO:0006897)	547	16	4.98	+	3.21	5.52e-05	0.000612
regulation of sprouting angiogenesis (GO:1903670)	68	6	0.62	+	9.68	5.57e-05	0.000617
epithelial to mesenchymal transition (GO:0001837)	68	6	0.62	+	9.68	5.57e-05	0.000618
positive regulation of DNA biosynthetic process (GO:2000573)	68	6	0.62	+	9.68	5.57e-05	0.000618
mesoderm formation (GO:0001707)	68	6	0.62	+	9.68	5.57e-05	0.000618
regulation of BMP signaling pathway (GO:0030510)	101	7	0.92	+	7.61	5.67e-05	0.000626
response to cAMP (GO:0051591)	101	7	0.92	+	7.61	5.67e-05	0.000627
blastocyst formation (GO:0001825)	41	5	0.37	+	13.38	5.78e-05	0.000638
T cell selection (GO:0045058)	41	5	0.37	+	13.38	5.78e-05	0.000638
ventricular septum morphogenesis (GO:0060412)	41	5	0.37	+	13.38	5.78e-05	0.000639
Fc-gamma receptor signaling pathway (GO:0038094)	139	8	1.27	+	6.32	5.83e-05	0.000643
positive regulation of T cell cytokine production (GO:0002726)	20	4	0.18	+	21.95	5.94e-05	0.000651
positive regulation of myeloid leukocyte cytokine production involved in immune response (GO:0061081)	20	4	0.18	+	21.95	5.94e-05	0.000651
leukocyte adhesion to vascular endothelial cell (GO:0061756)	20	4	0.18	+	21.95	5.94e-05	0.000652
embryonic hemopoiesis (GO:0035162)	20	4	0.18	+	21.95	5.94e-05	0.000652
lymphocyte apoptotic process (GO:0070227)	20	4	0.18	+	21.95	5.94e-05	0.000653
amyloid-beta metabolic process (GO:0050435)	20	4	0.18	+	21.95	5.94e-05	0.000653
positive regulation of superoxide anion generation (GO:0032930)	20	4	0.18	+	21.95	5.94e-05	0.000654
negative regulation of phagocytosis (GO:0050765)	20	4	0.18	+	21.95	5.94e-05	0.000654
growth hormone receptor signaling pathway (GO:0060396)	20	4	0.18	+	21.95	5.94e-05	0.000655
cellular response to retinoic acid (GO:0071300)	69	6	0.63	+	9.54	6.01e-05	0.000658
digestive system development (GO:0055123)	140	8	1.28	+	6.27	6.12e-05	0.00067
negative regulation of cell cycle process (GO:0010948)	326	12	2.97	+	4.04	6.13e-05	0.00067
antimicrobial humoral immune response mediated by antimicrobial peptide (GO:0061844)	103	7	0.94	+	7.46	6.37e-05	0.000695
columnar/cuboidal epithelial cell differentiation (GO:0002065)	103	7	0.94	+	7.46	6.37e-05	0.000696
negative regulation of interleukin-6 production (GO:0032715)	42	5	0.38	+	13.06	6.42e-05	0.0007
positive regulation of B cell proliferation (GO:0030890)	42	5	0.38	+	13.06	6.42e-05	0.0007
cell fate determination (GO:0001709)	42	5	0.38	+	13.06	6.42e-05	0.000701
regulation of insulin secretion (GO:0050796)	183	9	1.67	+	5.4	6.46e-05	0.000703
negative regulation of synaptic transmission (GO:0050805)	70	6	0.64	+	9.41	6.48e-05	0.000705
mesoderm morphogenesis (GO:0048332)	70	6	0.64	+	9.41	6.48e-05	0.000705
regulation of transmembrane transporter activity (GO:0022898)	278	11	2.53	+	4.34	6.72e-05	0.00073
antimicrobial humoral response (GO:0019730)	142	8	1.29	+	6.18	6.73e-05	0.000731
positive regulation of Ras protein signal transduction (GO:0046579)	71	6	0.65	+	9.27	6.98e-05	0.000756
regulation of cartilage development (GO:0061035)	71	6	0.65	+	9.27	6.98e-05	0.000756
vasculogenesis (GO:0001570)	71	6	0.65	+	9.27	6.98e-05	0.000757
determination of heart left/right asymmetry (GO:0061371)	71	6	0.65	+	9.27	6.98e-05	0.000757
negative regulation of neural precursor cell proliferation (GO:2000178)	21	4	0.19	+	20.9	7.02e-05	0.000759
positive regulation of cell migration involved in sprouting angiogenesis (GO:0090050)	21	4	0.19	+	20.9	7.02e-05	0.000759
positive regulation of sodium ion transmembrane transport (GO:1902307)	21	4	0.19	+	20.9	7.02e-05	0.00076
cellular response to growth hormone stimulus (GO:0071378)	21	4	0.19	+	20.9	7.02e-05	0.00076
negative regulation of epithelial cell apoptotic process (GO:1904036)	43	5	0.39	+	12.76	7.12e-05	0.000768
positive regulation of I-kappaB kinase/NF-kappaB signaling (GO:0043123)	186	9	1.69	+	5.31	7.28e-05	0.000785
cardiac ventricle morphogenesis (GO:0003208)	72	6	0.66	+	9.15	7.5e-05	0.000808
interferon-gamma-mediated signaling pathway (GO:0060333)	72	6	0.66	+	9.15	7.5e-05	0.000809
male gamete generation (GO:0048232)	563	16	5.13	+	3.12	7.66e-05	0.000825
oligodendrocyte development (GO:0014003)	44	5	0.4	+	12.47	7.87e-05	0.000845
positive regulation of calcium-mediated signaling (GO:0050850)	44	5	0.4	+	12.47	7.87e-05	0.000845
negative regulation of osteoblast differentiation (GO:0045668)	44	5	0.4	+	12.47	7.87e-05	0.000846
regulation of neuron migration (GO:2001222)	44	5	0.4	+	12.47	7.87e-05	0.000846
female sex differentiation (GO:0046660)	107	7	0.98	+	7.18	7.99e-05	0.000856
positive regulation of ion transmembrane transporter activity (GO:0032414)	107	7	0.98	+	7.18	7.99e-05	0.000857
receptor metabolic process (GO:0043112)	107	7	0.98	+	7.18	7.99e-05	0.000857
I-kappaB kinase/NF-kappaB signaling (GO:0007249)	73	6	0.67	+	9.02	8.06e-05	0.000863
response to insulin (GO:0032868)	235	10	2.14	+	4.67	8.12e-05	0.000869
positive regulation of tau-protein kinase activity (GO:1902949)	7	3	0.06	+	47.03	8.3e-05	0.00088
ectopic germ cell programmed cell death (GO:0035234)	7	3	0.06	+	47.03	8.3e-05	0.000881
positive regulation of protein deacetylation (GO:0090312)	22	4	0.2	+	19.95	8.24e-05	0.000881
post-embryonic camera-type eye development (GO:0031077)	7	3	0.06	+	47.03	8.3e-05	0.000882
Notch receptor processing, ligand-dependent (GO:0035333)	7	3	0.06	+	47.03	8.3e-05	0.000882
regulation of interleukin-1 beta biosynthetic process (GO:0050722)	7	3	0.06	+	47.03	8.3e-05	0.000883
positive regulation of NMDA glutamate receptor activity (GO:1904783)	7	3	0.06	+	47.03	8.3e-05	0.000883
regulation of interleukin-1 biosynthetic process (GO:0045360)	7	3	0.06	+	47.03	8.3e-05	0.000884
positive regulation of interleukin-1 beta biosynthetic process (GO:0050725)	7	3	0.06	+	47.03	8.3e-05	0.000884
positive regulation of interleukin-1 biosynthetic process (GO:0045362)	7	3	0.06	+	47.03	8.3e-05	0.000885
lung lobe morphogenesis (GO:0060463)	7	3	0.06	+	47.03	8.3e-05	0.000886
lung lobe development (GO:0060462)	7	3	0.06	+	47.03	8.3e-05	0.000886
amyloid-beta formation (GO:0034205)	7	3	0.06	+	47.03	8.3e-05	0.000887
retina development in camera-type eye (GO:0060041)	147	8	1.34	+	5.97	8.47e-05	0.000898
positive regulation of nucleotide metabolic process (GO:0045981)	45	5	0.41	+	12.19	8.68e-05	0.000914
negative regulation of transforming growth factor beta receptor signaling pathway (GO:0030512)	74	6	0.67	+	8.9	8.65e-05	0.000914
positive regulation of ATP metabolic process (GO:1903580)	45	5	0.41	+	12.19	8.68e-05	0.000915
modification by host of symbiont morphology or physiology (GO:0051851)	74	6	0.67	+	8.9	8.65e-05	0.000915
regulation of mitochondrial membrane permeability (GO:0046902)	74	6	0.67	+	8.9	8.65e-05	0.000915
regulation of leukocyte degranulation (GO:0043300)	45	5	0.41	+	12.19	8.68e-05	0.000916
regulation of long-term synaptic potentiation (GO:1900271)	45	5	0.41	+	12.19	8.68e-05	0.000916
cellular component disassembly (GO:0022411)	393	13	3.58	+	3.63	8.65e-05	0.000916
positive regulation of purine nucleotide metabolic process (GO:1900544)	45	5	0.41	+	12.19	8.68e-05	0.000917
regulation of lipid biosynthetic process (GO:0046890)	191	9	1.74	+	5.17	8.84e-05	0.00093
regulation of cell cycle arrest (GO:0071156)	109	7	0.99	+	7.05	8.92e-05	0.000938
positive regulation of transmembrane receptor protein serine/threonine kinase signaling pathway (GO:0090100)	109	7	0.99	+	7.05	8.92e-05	0.000938
regulation of bone mineralization (GO:0030500)	75	6	0.68	+	8.78	9.27e-05	0.000972
calcium-mediated signaling (GO:0019722)	149	8	1.36	+	5.89	9.26e-05	0.000972
cellular response to topologically incorrect protein (GO:0035967)	149	8	1.36	+	5.89	9.26e-05	0.000973
adult behavior (GO:0030534)	149	8	1.36	+	5.89	9.26e-05	0.000973
negative regulation of angiogenesis (GO:0016525)	110	7	1	+	6.98	9.41e-05	0.000986
response to heat (GO:0009408)	110	7	1	+	6.98	9.41e-05	0.000987
positive regulation of dendritic spine development (GO:0060999)	46	5	0.42	+	11.93	9.55e-05	0.000997
coronary vasculature development (GO:0060976)	46	5	0.42	+	11.93	9.55e-05	0.000997
response to progesterone (GO:0032570)	46	5	0.42	+	11.93	9.55e-05	0.000998
positive regulation of axon extension (GO:0045773)	46	5	0.42	+	11.93	9.55e-05	0.000999
cerebral cortex cell migration (GO:0021795)	46	5	0.42	+	11.93	9.55e-05	0.000999
regulation of superoxide anion generation (GO:0032928)	23	4	0.21	+	19.09	9.61e-05	0.001
lens morphogenesis in camera-type eye (GO:0002089)	23	4	0.21	+	19.09	9.61e-05	0.001
positive regulation of oligodendrocyte differentiation (GO:0048714)	23	4	0.21	+	19.09	9.61e-05	0.001
regulation of acute inflammatory response (GO:0002673)	46	5	0.42	+	11.93	9.55e-05	0.001
regulation of transporter activity (GO:0032409)	290	11	2.64	+	4.16	9.65e-05	0.001
sensory perception of pain (GO:0019233)	76	6	0.69	+	8.66	9.93e-05	0.00103
hormone secretion (GO:0046879)	76	6	0.69	+	8.66	9.93e-05	0.00103
negative regulation of cellular response to transforming growth factor beta stimulus (GO:1903845)	76	6	0.69	+	8.66	9.93e-05	0.00103
regulation of DNA biosynthetic process (GO:2000278)	111	7	1.01	+	6.92	9.93e-05	0.00103
regulation of canonical Wnt signaling pathway (GO:0060828)	292	11	2.66	+	4.13	0.000102	0.00106
positive regulation of epithelial to mesenchymal transition (GO:0010718)	47	5	0.43	+	11.67	0.000105	0.00109
stimulatory C-type lectin receptor signaling pathway (GO:0002223)	113	7	1.03	+	6.8	0.00011	0.00114
telencephalon glial cell migration (GO:0022030)	24	4	0.22	+	18.29	0.000111	0.00115
positive regulation of transcription initiation from RNA polymerase II promoter (GO:0060261)	24	4	0.22	+	18.29	0.000111	0.00115
negative regulation of synapse organization (GO:1905809)	24	4	0.22	+	18.29	0.000111	0.00115
cerebral cortex radial glia guided migration (GO:0021801)	24	4	0.22	+	18.29	0.000111	0.00115
tumor necrosis factor production (GO:0032640)	8	3	0.07	+	41.15	0.000113	0.00117
regulation of fever generation (GO:0031620)	8	3	0.07	+	41.15	0.000113	0.00117
regulation of core promoter binding (GO:1904796)	8	3	0.07	+	41.15	0.000113	0.00117
pri-miRNA transcription by RNA polymerase II (GO:0061614)	8	3	0.07	+	41.15	0.000113	0.00117
protein-containing complex assembly (GO:0065003)	1406	28	12.81	+	2.19	0.000114	0.00117
long-term synaptic potentiation (GO:0060291)	48	5	0.44	+	11.43	0.000115	0.00118
genitalia development (GO:0048806)	48	5	0.44	+	11.43	0.000115	0.00118
ventricular cardiac muscle tissue morphogenesis (GO:0055010)	48	5	0.44	+	11.43	0.000115	0.00118
transmembrane receptor protein serine/threonine kinase signaling pathway (GO:0007178)	198	9	1.8	+	4.99	0.000115	0.00118
regulation of muscle cell differentiation (GO:0051147)	155	8	1.41	+	5.66	0.00012	0.00123
positive regulation of small GTPase mediated signal transduction (GO:0051057)	79	6	0.72	+	8.33	0.000121	0.00124
regulation of dendritic spine development (GO:0060998)	79	6	0.72	+	8.33	0.000121	0.00124
associative learning (GO:0008306)	79	6	0.72	+	8.33	0.000121	0.00124
positive regulation of transporter activity (GO:0032411)	115	7	1.05	+	6.68	0.000122	0.00125
negative regulation of striated muscle tissue development (GO:0045843)	49	5	0.45	+	11.2	0.000126	0.00128
response to epidermal growth factor (GO:0070849)	49	5	0.45	+	11.2	0.000126	0.00129
negative regulation of leukocyte apoptotic process (GO:2000107)	49	5	0.45	+	11.2	0.000126	0.00129
regulation of cardiocyte differentiation (GO:1905207)	49	5	0.45	+	11.2	0.000126	0.00129
protein-containing complex subunit organization (GO:0043933)	1649	31	15.03	+	2.06	0.000126	0.00129
regulation of membrane protein ectodomain proteolysis (GO:0051043)	25	4	0.23	+	17.56	0.000128	0.0013
macrophage differentiation (GO:0030225)	25	4	0.23	+	17.56	0.000128	0.0013
negative regulation of regulated secretory pathway (GO:1903306)	25	4	0.23	+	17.56	0.000128	0.0013
regulation of heterotypic cell-cell adhesion (GO:0034114)	25	4	0.23	+	17.56	0.000128	0.00131
endoplasmic reticulum calcium ion homeostasis (GO:0032469)	25	4	0.23	+	17.56	0.000128	0.00131
lens fiber cell differentiation (GO:0070306)	25	4	0.23	+	17.56	0.000128	0.00131
response to anesthetic (GO:0072347)	80	6	0.73	+	8.23	0.000129	0.00131
regulation of neurotransmitter receptor activity (GO:0099601)	80	6	0.73	+	8.23	0.000129	0.00131
innate immune response activating cell surface receptor signaling pathway (GO:0002220)	116	7	1.06	+	6.62	0.000129	0.00131
defense response to virus (GO:0051607)	201	9	1.83	+	4.91	0.000128	0.00131
germ cell development (GO:0007281)	250	10	2.28	+	4.39	0.000132	0.00134
organic substance transport (GO:0071702)	2217	38	20.2	+	1.88	0.000136	0.00137
positive regulation of extrinsic apoptotic signaling pathway (GO:2001238)	50	5	0.46	+	10.97	0.000137	0.00139
negative regulation of muscle organ development (GO:0048635)	50	5	0.46	+	10.97	0.000137	0.00139
regulation of release of sequestered calcium ion into cytosol (GO:0051279)	81	6	0.74	+	8.13	0.000138	0.00139
bone development (GO:0060348)	204	9	1.86	+	4.84	0.000142	0.00144
adult locomotory behavior (GO:0008344)	82	6	0.75	+	8.03	0.000147	0.00147
regulation of interferon-gamma-mediated signaling pathway (GO:0060334)	26	4	0.24	+	16.88	0.000147	0.00148
regulation of response to interferon-gamma (GO:0060330)	26	4	0.24	+	16.88	0.000147	0.00148
positive regulation of transcription regulatory region DNA binding (GO:2000679)	26	4	0.24	+	16.88	0.000147	0.00148
cell-substrate adherens junction assembly (GO:0007045)	26	4	0.24	+	16.88	0.000147	0.00148
bone cell development (GO:0098751)	26	4	0.24	+	16.88	0.000147	0.00148
thyroid gland development (GO:0030878)	26	4	0.24	+	16.88	0.000147	0.00148
focal adhesion assembly (GO:0048041)	26	4	0.24	+	16.88	0.000147	0.00148
regulation of potassium ion transmembrane transport (GO:1901379)	82	6	0.75	+	8.03	0.000147	0.00148
muscle organ morphogenesis (GO:0048644)	82	6	0.75	+	8.03	0.000147	0.00148
Bergmann glial cell differentiation (GO:0060020)	9	3	0.08	+	36.58	0.00015	0.0015
modulation of age-related behavioral decline (GO:0090647)	9	3	0.08	+	36.58	0.00015	0.0015
cellular response to nicotine (GO:0071316)	9	3	0.08	+	36.58	0.00015	0.0015
positive regulation of axon regeneration (GO:0048680)	9	3	0.08	+	36.58	0.00015	0.0015
post-embryonic animal organ morphogenesis (GO:0048563)	9	3	0.08	+	36.58	0.00015	0.0015
positive regulation of aspartic-type peptidase activity (GO:1905247)	9	3	0.08	+	36.58	0.00015	0.0015
cardiac neural crest cell development involved in heart development (GO:0061308)	9	3	0.08	+	36.58	0.00015	0.0015
cardiac neural crest cell differentiation involved in heart development (GO:0061307)	9	3	0.08	+	36.58	0.00015	0.0015
positive chemotaxis (GO:0050918)	51	5	0.46	+	10.76	0.00015	0.0015
integrin activation (GO:0033622)	9	3	0.08	+	36.58	0.00015	0.00151
canonical Wnt signaling pathway (GO:0060070)	83	6	0.76	+	7.93	0.000156	0.00156
hormone transport (GO:0009914)	83	6	0.76	+	7.93	0.000156	0.00156
odontogenesis of dentin-containing tooth (GO:0042475)	83	6	0.76	+	7.93	0.000156	0.00156
central nervous system neuron development (GO:0021954)	83	6	0.76	+	7.93	0.000156	0.00156
response to amino acid (GO:0043200)	120	7	1.09	+	6.4	0.000157	0.00156
epidermis development (GO:0008544)	418	13	3.81	+	3.41	0.000156	0.00156
regulation of cellular protein catabolic process (GO:1903362)	256	10	2.33	+	4.29	0.000159	0.00158
regulation of reproductive process (GO:2000241)	162	8	1.48	+	5.42	0.000161	0.0016
negative regulation of muscle tissue development (GO:1901862)	52	5	0.47	+	10.55	0.000163	0.00162
ureteric bud development (GO:0001657)	84	6	0.77	+	7.84	0.000166	0.00165
negative regulation of autophagy (GO:0010507)	84	6	0.77	+	7.84	0.000166	0.00165
cell differentiation involved in embryonic placenta development (GO:0060706)	27	4	0.25	+	16.26	0.000167	0.00166
regulation of endocytosis (GO:0030100)	209	9	1.9	+	4.73	0.00017	0.00168
odontogenesis (GO:0042476)	122	7	1.11	+	6.3	0.000173	0.00171
cochlea development (GO:0090102)	53	5	0.48	+	10.35	0.000177	0.00174
protein insertion into membrane (GO:0051205)	53	5	0.48	+	10.35	0.000177	0.00174
positive regulation of T cell mediated immunity (GO:0002711)	53	5	0.48	+	10.35	0.000177	0.00174
regulation of membrane permeability (GO:0090559)	85	6	0.77	+	7.75	0.000177	0.00174
epithelial cell migration (GO:0010631)	85	6	0.77	+	7.75	0.000177	0.00174
regulation of chondrocyte differentiation (GO:0032330)	53	5	0.48	+	10.35	0.000177	0.00175
mesonephric tubule development (GO:0072164)	85	6	0.77	+	7.75	0.000177	0.00175
mesonephric epithelium development (GO:0072163)	85	6	0.77	+	7.75	0.000177	0.00175
regulation of muscle adaptation (GO:0043502)	86	6	0.78	+	7.66	0.000188	0.00184
regulation of epidermal growth factor receptor signaling pathway (GO:0042058)	86	6	0.78	+	7.66	0.000188	0.00184
regulation of sodium ion transport (GO:0002028)	86	6	0.78	+	7.66	0.000188	0.00185
aorta morphogenesis (GO:0035909)	28	4	0.26	+	15.68	0.00019	0.00186
positive T cell selection (GO:0043368)	28	4	0.26	+	15.68	0.00019	0.00186
programmed necrotic cell death (GO:0097300)	28	4	0.26	+	15.68	0.00019	0.00186
positive regulation of vascular endothelial growth factor production (GO:0010575)	28	4	0.26	+	15.68	0.00019	0.00186
positive regulation of steroid metabolic process (GO:0045940)	28	4	0.26	+	15.68	0.00019	0.00186
memory (GO:0007613)	124	7	1.13	+	6.2	0.000191	0.00186
regulation of axon regeneration (GO:0048679)	28	4	0.26	+	15.68	0.00019	0.00187
regulation of dendritic cell apoptotic process (GO:2000668)	10	3	0.09	+	32.92	0.000194	0.00189
vagina development (GO:0060068)	10	3	0.09	+	32.92	0.000194	0.00189
regulation of apoptotic cell clearance (GO:2000425)	10	3	0.09	+	32.92	0.000194	0.00189
positive regulation of neuron projection regeneration (GO:0070572)	10	3	0.09	+	32.92	0.000194	0.00189
programmed cell death involved in cell development (GO:0010623)	10	3	0.09	+	32.92	0.000194	0.00189
negative regulation of myeloid leukocyte mediated immunity (GO:0002887)	10	3	0.09	+	32.92	0.000194	0.00189
regulation of dephosphorylation (GO:0035303)	213	9	1.94	+	4.64	0.000194	0.00189
Notch receptor processing (GO:0007220)	10	3	0.09	+	32.92	0.000194	0.0019
positive regulation of cell division (GO:0051781)	87	6	0.79	+	7.57	0.000199	0.00194
mesoderm development (GO:0007498)	125	7	1.14	+	6.15	0.0002	0.00194
response to nerve growth factor (GO:1990089)	55	5	0.5	+	9.98	0.000208	0.00202
regulation of DNA-templated transcription in response to stress (GO:0043620)	126	7	1.15	+	6.1	0.000209	0.00203
response to vitamin (GO:0033273)	88	6	0.8	+	7.48	0.000211	0.00205
epithelium migration (GO:0090132)	88	6	0.8	+	7.48	0.000211	0.00205
positive regulation of B cell activation (GO:0050871)	169	8	1.54	+	5.19	0.000212	0.00205
regulation of regulatory T cell differentiation (GO:0045589)	29	4	0.26	+	15.14	0.000215	0.00208
regulation of interleukin-17 production (GO:0032660)	29	4	0.26	+	15.14	0.000215	0.00208
positive regulation of release of cytochrome c from mitochondria (GO:0090200)	29	4	0.26	+	15.14	0.000215	0.00208
midbrain development (GO:0030901)	89	6	0.81	+	7.4	0.000224	0.00216
regulation of lymphocyte apoptotic process (GO:0070228)	56	5	0.51	+	9.8	0.000225	0.00217
regulation of morphogenesis of a branching structure (GO:0060688)	56	5	0.51	+	9.8	0.000225	0.00217
digestive tract development (GO:0048565)	128	7	1.17	+	6	0.000229	0.00221
regulation of stress fiber assembly (GO:0051492)	90	6	0.82	+	7.32	0.000237	0.00228
regulation of tumor necrosis factor secretion (GO:1904467)	30	4	0.27	+	14.63	0.000242	0.00232
modulation by host of viral process (GO:0044788)	30	4	0.27	+	14.63	0.000242	0.00233
positive regulation of leukocyte apoptotic process (GO:2000108)	30	4	0.27	+	14.63	0.000242	0.00233
necrotic cell death (GO:0070265)	30	4	0.27	+	14.63	0.000242	0.00233
positive regulation of oxidoreductase activity (GO:0051353)	57	5	0.52	+	9.63	0.000243	0.00233
cortical cytoskeleton organization (GO:0030865)	57	5	0.52	+	9.63	0.000243	0.00233
regulation of receptor clustering (GO:1903909)	11	3	0.1	+	29.93	0.000245	0.00234
negative regulation of production of miRNAs involved in gene silencing by miRNA (GO:1903799)	11	3	0.1	+	29.93	0.000245	0.00234
bone trabecula morphogenesis (GO:0061430)	11	3	0.1	+	29.93	0.000245	0.00234
regulation of T-helper 2 cell differentiation (GO:0045628)	11	3	0.1	+	29.93	0.000245	0.00235
regulation of neutrophil activation (GO:1902563)	11	3	0.1	+	29.93	0.000245	0.00235
positive regulation of MHC class II biosynthetic process (GO:0045348)	11	3	0.1	+	29.93	0.000245	0.00235
detection of molecule of bacterial origin (GO:0032490)	11	3	0.1	+	29.93	0.000245	0.00235
synapse pruning (GO:0098883)	11	3	0.1	+	29.93	0.000245	0.00235
skin morphogenesis (GO:0043589)	11	3	0.1	+	29.93	0.000245	0.00235
Fc-epsilon receptor signaling pathway (GO:0038095)	173	8	1.58	+	5.07	0.000247	0.00235
signal release (GO:0023061)	173	8	1.58	+	5.07	0.000247	0.00235
regulation of proteolysis involved in cellular protein catabolic process (GO:1903050)	220	9	2	+	4.49	0.000245	0.00235
small GTPase mediated signal transduction (GO:0007264)	325	11	2.96	+	3.71	0.000251	0.0024
sprouting angiogenesis (GO:0002040)	58	5	0.53	+	9.46	0.000262	0.00249
regulation of interleukin-2 production (GO:0032663)	58	5	0.53	+	9.46	0.000262	0.00249
positive regulation of dephosphorylation (GO:0035306)	58	5	0.53	+	9.46	0.000262	0.00249
mitochondrial membrane organization (GO:0007006)	131	7	1.19	+	5.86	0.000262	0.00249
regulation of exocytosis (GO:0017157)	222	9	2.02	+	4.45	0.000261	0.00249
postsynapse organization (GO:0099173)	92	6	0.84	+	7.16	0.000265	0.00251
defense response to Gram-negative bacterium (GO:0050829)	92	6	0.84	+	7.16	0.000265	0.00252
cerebral cortex radially oriented cell migration (GO:0021799)	31	4	0.28	+	14.16	0.000271	0.00257
regulation of neuroblast proliferation (GO:1902692)	31	4	0.28	+	14.16	0.000271	0.00257
regulation of neuron projection regeneration (GO:0070570)	31	4	0.28	+	14.16	0.000271	0.00257
rhythmic process (GO:0048511)	275	10	2.51	+	3.99	0.000278	0.00263
regulation of biomineralization (GO:0110149)	93	6	0.85	+	7.08	0.00028	0.00265
regulation of biomineral tissue development (GO:0070167)	93	6	0.85	+	7.08	0.00028	0.00265
positive regulation of cytoskeleton organization (GO:0051495)	225	9	2.05	+	4.39	0.000287	0.00271
positive regulation of translation (GO:0045727)	134	7	1.22	+	5.73	0.000299	0.00283
negative regulation of protein serine/threonine kinase activity (GO:0071901)	134	7	1.22	+	5.73	0.000299	0.00283
neuron remodeling (GO:0016322)	12	3	0.11	+	27.44	0.000304	0.00285
regulation of humoral immune response mediated by circulating immunoglobulin (GO:0002923)	12	3	0.11	+	27.44	0.000304	0.00285
smooth muscle cell differentiation (GO:0051145)	32	4	0.29	+	13.72	0.000303	0.00285
I-kappaB phosphorylation (GO:0007252)	12	3	0.11	+	27.44	0.000304	0.00286
positive regulation of chemokine (C-X-C motif) ligand 2 production (GO:2000343)	12	3	0.11	+	27.44	0.000304	0.00286
amyloid precursor protein catabolic process (GO:0042987)	12	3	0.11	+	27.44	0.000304	0.00286
regulation of aspartic-type peptidase activity (GO:1905245)	12	3	0.11	+	27.44	0.000304	0.00286
negative regulation of leukocyte degranulation (GO:0043301)	12	3	0.11	+	27.44	0.000304	0.00286
negative regulation of long-term synaptic potentiation (GO:1900272)	12	3	0.11	+	27.44	0.000304	0.00286
cellular senescence (GO:0090398)	32	4	0.29	+	13.72	0.000303	0.00286
regulation of cardiac muscle tissue growth (GO:0055021)	60	5	0.55	+	9.15	0.000303	0.00286
negative regulation of immunoglobulin production (GO:0002638)	12	3	0.11	+	27.44	0.000304	0.00287
regulation of leukocyte tethering or rolling (GO:1903236)	12	3	0.11	+	27.44	0.000304	0.00287
tissue migration (GO:0090130)	95	6	0.87	+	6.93	0.000312	0.00292
establishment of protein localization to organelle (GO:0072594)	450	13	4.1	+	3.17	0.000313	0.00293
blood circulation (GO:0008015)	392	12	3.57	+	3.36	0.000322	0.00301
regulation of epidermal cell differentiation (GO:0045604)	61	5	0.56	+	9	0.000326	0.00305
regulation of sequestering of calcium ion (GO:0051282)	136	7	1.24	+	5.65	0.000326	0.00305
regulation of dendrite morphogenesis (GO:0048814)	96	6	0.87	+	6.86	0.000329	0.00307
segmentation (GO:0035282)	96	6	0.87	+	6.86	0.000329	0.00307
salivary gland development (GO:0007431)	33	4	0.3	+	13.3	0.000337	0.00314
positive regulation of interleukin-2 production (GO:0032743)	33	4	0.3	+	13.3	0.000337	0.00314
negative regulation of cardiac muscle tissue development (GO:0055026)	33	4	0.3	+	13.3	0.000337	0.00314
negative regulation of organ growth (GO:0046621)	33	4	0.3	+	13.3	0.000337	0.00314
positive regulation of epithelial cell apoptotic process (GO:1904037)	33	4	0.3	+	13.3	0.000337	0.00314
protein localization to membrane (GO:0072657)	516	14	4.7	+	2.98	0.000342	0.00318
regulation of calcium-mediated signaling (GO:0050848)	98	6	0.89	+	6.72	0.000365	0.00339
protein localization to endosome (GO:0036010)	13	3	0.12	+	25.33	0.000372	0.00344
positive regulation of keratinocyte proliferation (GO:0010838)	13	3	0.12	+	25.33	0.000372	0.00344
negative regulation by host of viral process (GO:0044793)	13	3	0.12	+	25.33	0.000372	0.00345
post-embryonic animal morphogenesis (GO:0009886)	13	3	0.12	+	25.33	0.000372	0.00345
regulation of heat generation (GO:0031650)	13	3	0.12	+	25.33	0.000372	0.00345
activation of MAPKKK activity (GO:0000185)	13	3	0.12	+	25.33	0.000372	0.00345
T cell homeostasis (GO:0043029)	34	4	0.31	+	12.91	0.000374	0.00345
extrinsic apoptotic signaling pathway via death domain receptors (GO:0008625)	34	4	0.31	+	12.91	0.000374	0.00345
positive regulation of sodium ion transport (GO:0010765)	34	4	0.31	+	12.91	0.000374	0.00345
heart trabecula morphogenesis (GO:0061384)	34	4	0.31	+	12.91	0.000374	0.00345
positive regulation of cartilage development (GO:0061036)	34	4	0.31	+	12.91	0.000374	0.00345
regulation of sodium ion transmembrane transport (GO:1902305)	63	5	0.57	+	8.71	0.000375	0.00345
regulation of antigen receptor-mediated signaling pathway (GO:0050854)	63	5	0.57	+	8.71	0.000375	0.00345
chronic inflammatory response (GO:0002544)	13	3	0.12	+	25.33	0.000372	0.00346
macrophage activation involved in immune response (GO:0002281)	13	3	0.12	+	25.33	0.000372	0.00346
regulation of T-helper cell differentiation (GO:0045622)	34	4	0.31	+	12.91	0.000374	0.00346
spleen development (GO:0048536)	34	4	0.31	+	12.91	0.000374	0.00346
regulation of actomyosin structure organization (GO:0110020)	99	6	0.9	+	6.65	0.000384	0.00354
negative regulation of cell growth (GO:0030308)	186	8	1.69	+	4.72	0.000393	0.00361
circulatory system process (GO:0003013)	401	12	3.65	+	3.28	0.000392	0.00361
positive regulation of actin filament bundle assembly (GO:0032233)	64	5	0.58	+	8.57	0.000401	0.00368
cardiac muscle tissue morphogenesis (GO:0055008)	64	5	0.58	+	8.57	0.000401	0.00368
regulation of muscle system process (GO:0090257)	236	9	2.15	+	4.19	0.000402	0.00368
regulation of cation channel activity (GO:2001257)	187	8	1.7	+	4.69	0.000407	0.00373
response to growth hormone (GO:0060416)	35	4	0.32	+	12.54	0.000414	0.00379
cellular response to interleukin-6 (GO:0071354)	35	4	0.32	+	12.54	0.000414	0.00379
positive regulation of signaling receptor activity (GO:2000273)	35	4	0.32	+	12.54	0.000414	0.00379
negative regulation of type 2 immune response (GO:0002829)	14	3	0.13	+	23.52	0.000449	0.00408
regulation of RNA polymerase II transcriptional preinitiation complex assembly (GO:0045898)	14	3	0.13	+	23.52	0.000449	0.00408
negative regulation of pri-miRNA transcription by RNA polymerase II (GO:1902894)	14	3	0.13	+	23.52	0.000449	0.00408
positive regulation of extrinsic apoptotic signaling pathway via death domain receptors (GO:1902043)	14	3	0.13	+	23.52	0.000449	0.00409
positive regulation of phospholipid biosynthetic process (GO:0071073)	14	3	0.13	+	23.52	0.000449	0.00409
vascular smooth muscle cell differentiation (GO:0035886)	14	3	0.13	+	23.52	0.000449	0.00409
response to laminar fluid shear stress (GO:0034616)	14	3	0.13	+	23.52	0.000449	0.00409
regulation of striated muscle cell differentiation (GO:0051153)	102	6	0.93	+	6.46	0.000447	0.00409
regulation of mitochondrion organization (GO:0010821)	190	8	1.73	+	4.62	0.00045	0.00409
regulation of growth hormone secretion (GO:0060123)	14	3	0.13	+	23.52	0.000449	0.0041
hematopoietic stem cell proliferation (GO:0071425)	14	3	0.13	+	23.52	0.000449	0.0041
left/right axis specification (GO:0070986)	14	3	0.13	+	23.52	0.000449	0.0041
regulation of postsynaptic membrane organization (GO:1901626)	14	3	0.13	+	23.52	0.000449	0.0041
regulation of cardiac muscle cell differentiation (GO:2000725)	36	4	0.33	+	12.19	0.000457	0.00414
positive regulation of interleukin-10 production (GO:0032733)	36	4	0.33	+	12.19	0.000457	0.00414
central nervous system neuron axonogenesis (GO:0021955)	36	4	0.33	+	12.19	0.000457	0.00414
tissue regeneration (GO:0042246)	66	5	0.6	+	8.31	0.000458	0.00414
cell aging (GO:0007569)	66	5	0.6	+	8.31	0.000458	0.00414
regulation of heart growth (GO:0060420)	66	5	0.6	+	8.31	0.000458	0.00415
somitogenesis (GO:0001756)	66	5	0.6	+	8.31	0.000458	0.00415
positive regulation of cellular protein catabolic process (GO:1903364)	145	7	1.32	+	5.3	0.000471	0.00426
microglial cell migration (GO:1904124)	2	2	0.02	+	> 100	0.000481	0.00431
positive regulation of chronic inflammatory response to antigenic stimulus (GO:0002876)	2	2	0.02	+	> 100	0.000481	0.00431
lateral inhibition (GO:0046331)	2	2	0.02	+	> 100	0.000481	0.00431
regulation of leukocyte adhesion to arterial endothelial cell (GO:1904997)	2	2	0.02	+	> 100	0.000481	0.00432
positive regulation of matrix metallopeptidase secretion (GO:1904466)	2	2	0.02	+	> 100	0.000481	0.00432
negative regulation of neuromuscular junction development (GO:1904397)	2	2	0.02	+	> 100	0.000481	0.00432
intestinal epithelial cell migration (GO:0061582)	2	2	0.02	+	> 100	0.000481	0.00432
cell-cell adhesion in response to extracellular stimulus (GO:0140039)	2	2	0.02	+	> 100	0.000481	0.00433
positive regulation of inhibitory synapse assembly (GO:1905704)	2	2	0.02	+	> 100	0.000481	0.00433
positive regulation of inflammatory response to wounding (GO:0106016)	2	2	0.02	+	> 100	0.000481	0.00433
neutrophil aggregation (GO:0070488)	2	2	0.02	+	> 100	0.000481	0.00433
regulation of astrocyte chemotaxis (GO:2000458)	2	2	0.02	+	> 100	0.000481	0.00434
cell-cell signaling involved in cell fate commitment (GO:0045168)	2	2	0.02	+	> 100	0.000481	0.00434
smooth endoplasmic reticulum calcium ion homeostasis (GO:0051563)	2	2	0.02	+	> 100	0.000481	0.00434
regulation of immune complex clearance by monocytes and macrophages (GO:0090264)	2	2	0.02	+	> 100	0.000481	0.00434
B cell negative selection (GO:0002352)	2	2	0.02	+	> 100	0.000481	0.00435
cellular response to ionizing radiation (GO:0071479)	67	5	0.61	+	8.19	0.000488	0.00437
cellular response to heat (GO:0034605)	67	5	0.61	+	8.19	0.000488	0.00437
negative regulation of viral process (GO:0048525)	104	6	0.95	+	6.33	0.000493	0.00441
neurotransmitter receptor transport (GO:0099637)	37	4	0.34	+	11.86	0.000502	0.00449
negative regulation of striated muscle cell differentiation (GO:0051154)	37	4	0.34	+	11.86	0.000502	0.00449
blastocyst development (GO:0001824)	105	6	0.96	+	6.27	0.000517	0.00462
regulation of Notch signaling pathway (GO:0008593)	105	6	0.96	+	6.27	0.000517	0.00462
negative regulation of gene silencing by miRNA (GO:0060965)	15	3	0.14	+	21.95	0.000535	0.00475
apoptotic process involved in morphogenesis (GO:0060561)	15	3	0.14	+	21.95	0.000535	0.00475
regulation of developmental pigmentation (GO:0048070)	15	3	0.14	+	21.95	0.000535	0.00476
regulation of macrophage cytokine production (GO:0010935)	15	3	0.14	+	21.95	0.000535	0.00476
positive regulation of macrophage chemotaxis (GO:0010759)	15	3	0.14	+	21.95	0.000535	0.00476
negative regulation of bone resorption (GO:0045779)	15	3	0.14	+	21.95	0.000535	0.00477
angiogenesis involved in wound healing (GO:0060055)	15	3	0.14	+	21.95	0.000535	0.00477
otic vesicle development (GO:0071599)	15	3	0.14	+	21.95	0.000535	0.00477
positive regulation of cell aging (GO:0090343)	15	3	0.14	+	21.95	0.000535	0.00477
negative regulation of extrinsic apoptotic signaling pathway (GO:2001237)	106	6	0.97	+	6.21	0.000543	0.00482
cellular response to glucose starvation (GO:0042149)	38	4	0.35	+	11.55	0.000551	0.00489
Ras protein signal transduction (GO:0007265)	248	9	2.26	+	3.98	0.000567	0.00503
DNA duplex unwinding (GO:0032508)	107	6	0.98	+	6.15	0.000569	0.00504
negative regulation of G1/S transition of mitotic cell cycle (GO:2000134)	107	6	0.98	+	6.15	0.000569	0.00504
regulation of synaptic transmission, glutamatergic (GO:0051966)	70	5	0.64	+	7.84	0.000589	0.00522
positive regulation of immunoglobulin mediated immune response (GO:0002891)	39	4	0.36	+	11.26	0.000604	0.00533
positive regulation of B cell mediated immunity (GO:0002714)	39	4	0.36	+	11.26	0.000604	0.00533
response to interleukin-6 (GO:0070741)	39	4	0.36	+	11.26	0.000604	0.00534
regulation of protein localization to cell surface (GO:2000008)	39	4	0.36	+	11.26	0.000604	0.00534
response to ketone (GO:1901654)	200	8	1.82	+	4.39	0.000623	0.0055
regulation of behavior (GO:0050795)	71	5	0.65	+	7.73	0.000626	0.00552
negative regulation of axonogenesis (GO:0050771)	71	5	0.65	+	7.73	0.000626	0.00552
ventricular trabecula myocardium morphogenesis (GO:0003222)	16	3	0.15	+	20.58	0.000631	0.00553
regulation of extracellular matrix disassembly (GO:0010715)	16	3	0.15	+	20.58	0.000631	0.00554
vascular smooth muscle contraction (GO:0014829)	16	3	0.15	+	20.58	0.000631	0.00554
positive regulation of type 2 immune response (GO:0002830)	16	3	0.15	+	20.58	0.000631	0.00554
regulation of MHC class II biosynthetic process (GO:0045346)	16	3	0.15	+	20.58	0.000631	0.00555
CD4-positive or CD8-positive, alpha-beta T cell lineage commitment (GO:0043369)	16	3	0.15	+	20.58	0.000631	0.00555
positive regulation of T cell chemotaxis (GO:0010820)	16	3	0.15	+	20.58	0.000631	0.00555
negative regulation of T-helper cell differentiation (GO:0045623)	16	3	0.15	+	20.58	0.000631	0.00556
trophectodermal cell differentiation (GO:0001829)	16	3	0.15	+	20.58	0.000631	0.00556
positive regulation of sodium ion transmembrane transporter activity (GO:2000651)	16	3	0.15	+	20.58	0.000631	0.00556
negative regulation of cell cycle G1/S phase transition (GO:1902807)	110	6	1	+	5.99	0.000653	0.00572
glandular epithelial cell differentiation (GO:0002067)	40	4	0.36	+	10.97	0.000659	0.00577
positive regulation of bone mineralization (GO:0030501)	40	4	0.36	+	10.97	0.000659	0.00577
peptidyl-threonine phosphorylation (GO:0018107)	72	5	0.66	+	7.62	0.000665	0.00581
interaction with host (GO:0051701)	154	7	1.4	+	4.99	0.000664	0.00581
regulation of hematopoietic stem cell differentiation (GO:1902036)	73	5	0.67	+	7.52	0.000705	0.00616
striated muscle cell differentiation (GO:0051146)	204	8	1.86	+	4.3	0.000706	0.00616
regulation of ubiquitin-dependent protein catabolic process (GO:2000058)	156	7	1.42	+	4.92	0.000714	0.00623
regulation of protein export from nucleus (GO:0046825)	41	4	0.37	+	10.71	0.000719	0.00626
embryo implantation (GO:0007566)	41	4	0.37	+	10.71	0.000719	0.00626
acute-phase response (GO:0006953)	41	4	0.37	+	10.71	0.000719	0.00627
prostate gland development (GO:0030850)	41	4	0.37	+	10.71	0.000719	0.00627
establishment or maintenance of cell polarity (GO:0007163)	205	8	1.87	+	4.28	0.000728	0.00634
negative regulation of gene silencing by RNA (GO:0060967)	17	3	0.15	+	19.37	0.000738	0.00637
positive regulation of glutamate receptor signaling pathway (GO:1900451)	17	3	0.15	+	19.37	0.000738	0.00638
regulation of granulocyte differentiation (GO:0030852)	17	3	0.15	+	19.37	0.000738	0.00638
regulation of T cell chemotaxis (GO:0010819)	17	3	0.15	+	19.37	0.000738	0.00638
positive regulation of protein localization to cell surface (GO:2000010)	17	3	0.15	+	19.37	0.000738	0.00639
megakaryocyte development (GO:0035855)	17	3	0.15	+	19.37	0.000738	0.00639
interleukin-6-mediated signaling pathway (GO:0070102)	17	3	0.15	+	19.37	0.000738	0.00639
negative regulation of posttranscriptional gene silencing (GO:0060149)	17	3	0.15	+	19.37	0.000738	0.0064
estrous cycle (GO:0044849)	17	3	0.15	+	19.37	0.000738	0.0064
regulation of fibroblast apoptotic process (GO:2000269)	17	3	0.15	+	19.37	0.000738	0.0064
negative regulation of cardiac muscle cell differentiation (GO:2000726)	17	3	0.15	+	19.37	0.000738	0.00641
definitive hemopoiesis (GO:0060216)	17	3	0.15	+	19.37	0.000738	0.00641
positive regulation of neuron migration (GO:2001224)	17	3	0.15	+	19.37	0.000738	0.00642
negative regulation of mitotic cell cycle (GO:0045930)	313	10	2.85	+	3.51	0.000738	0.00642
regulation of glucose transmembrane transport (GO:0010827)	74	5	0.67	+	7.42	0.000748	0.00645
regulation of cardiac muscle cell proliferation (GO:0060043)	42	4	0.38	+	10.45	0.000782	0.00674
negative regulation of gliogenesis (GO:0014014)	42	4	0.38	+	10.45	0.000782	0.00674
regulation of chronic inflammatory response to antigenic stimulus (GO:0002874)	3	2	0.03	+	73.16	0.000797	0.00681
regulation of T cell mediated immune response to tumor cell (GO:0002840)	3	2	0.03	+	73.16	0.000797	0.00681
regulation of muscle hyperplasia (GO:0014738)	3	2	0.03	+	73.16	0.000797	0.00681
regulation of substrate-dependent cell migration, cell attachment to substrate (GO:1904235)	3	2	0.03	+	73.16	0.000797	0.00682
negative regulation of alkaline phosphatase activity (GO:0010693)	3	2	0.03	+	73.16	0.000797	0.00682
regulation of autophagic cell death (GO:1904092)	3	2	0.03	+	73.16	0.000797	0.00682
muscle tissue morphogenesis (GO:0060415)	75	5	0.68	+	7.32	0.000792	0.00682
positive regulation of cation channel activity (GO:2001259)	75	5	0.68	+	7.32	0.000792	0.00682
positive regulation of 1-phosphatidylinositol-3-kinase activity (GO:0061903)	3	2	0.03	+	73.16	0.000797	0.00683
regulation of 1-phosphatidylinositol-3-kinase activity (GO:0061901)	3	2	0.03	+	73.16	0.000797	0.00683
positive regulation of substrate-dependent cell migration, cell attachment to substrate (GO:1904237)	3	2	0.03	+	73.16	0.000797	0.00683
regulation of inhibitory synapse assembly (GO:1905702)	3	2	0.03	+	73.16	0.000797	0.00684
post-embryonic camera-type eye morphogenesis (GO:0048597)	3	2	0.03	+	73.16	0.000797	0.00684
B cell selection (GO:0002339)	3	2	0.03	+	73.16	0.000797	0.00685
apoptotic process involved in embryonic digit morphogenesis (GO:1902263)	3	2	0.03	+	73.16	0.000797	0.00685
cellular hyperosmotic salinity response (GO:0071475)	3	2	0.03	+	73.16	0.000797	0.00685
regulation of calcium ion transmembrane transport (GO:1903169)	159	7	1.45	+	4.83	0.000795	0.00685
negative regulation of forebrain neuron differentiation (GO:2000978)	3	2	0.03	+	73.16	0.000797	0.00686
dendrite development (GO:0016358)	115	6	1.05	+	5.73	0.000815	0.00696
diencephalon development (GO:0021536)	76	5	0.69	+	7.22	0.000838	0.00714
regulation of alcohol biosynthetic process (GO:1902930)	76	5	0.69	+	7.22	0.000838	0.00714
cellular response to amino acid starvation (GO:0034198)	76	5	0.69	+	7.22	0.000838	0.00715
monocyte differentiation (GO:0030224)	18	3	0.16	+	18.29	0.000855	0.00726
regulation of Rac protein signal transduction (GO:0035020)	18	3	0.16	+	18.29	0.000855	0.00726
3'-UTR-mediated mRNA destabilization (GO:0061158)	18	3	0.16	+	18.29	0.000855	0.00726
regulation of immunoglobulin secretion (GO:0051023)	18	3	0.16	+	18.29	0.000855	0.00727
positive regulation of histone deacetylation (GO:0031065)	18	3	0.16	+	18.29	0.000855	0.00727
mononuclear cell differentiation (GO:1903131)	18	3	0.16	+	18.29	0.000855	0.00728
dendritic cell chemotaxis (GO:0002407)	18	3	0.16	+	18.29	0.000855	0.00728
negative regulation of interleukin-10 production (GO:0032693)	18	3	0.16	+	18.29	0.000855	0.00728
regulation of regulated secretory pathway (GO:1903305)	163	7	1.49	+	4.71	0.000914	0.00775
positive regulation of protein dephosphorylation (GO:0035307)	44	4	0.4	+	9.98	0.000919	0.00778
exocrine system development (GO:0035272)	44	4	0.4	+	9.98	0.000919	0.00778
positive regulation of immunoglobulin production (GO:0002639)	44	4	0.4	+	9.98	0.000919	0.00779
regulation of bone resorption (GO:0045124)	44	4	0.4	+	9.98	0.000919	0.00779
regulation of cell cycle G2/M phase transition (GO:1902749)	214	8	1.95	+	4.1	0.000952	0.00805
positive regulation of mitochondrion organization (GO:0010822)	119	6	1.08	+	5.53	0.000966	0.00817
regulation of epithelial tube formation (GO:1905276)	19	3	0.17	+	17.33	0.000983	0.00828
positive regulation of T-helper 1 type immune response (GO:0002827)	19	3	0.17	+	17.33	0.000983	0.00828
detection of external biotic stimulus (GO:0098581)	19	3	0.17	+	17.33	0.000983	0.00829
amyloid precursor protein metabolic process (GO:0042982)	19	3	0.17	+	17.33	0.000983	0.00829
eosinophil chemotaxis (GO:0048245)	19	3	0.17	+	17.33	0.000983	0.00829
positive regulation of endothelial cell apoptotic process (GO:2000353)	19	3	0.17	+	17.33	0.000983	0.0083
leukocyte tethering or rolling (GO:0050901)	19	3	0.17	+	17.33	0.000983	0.0083
nephron tubule development (GO:0072080)	79	5	0.72	+	6.95	0.000988	0.0083
negative regulation of lymphocyte proliferation (GO:0050672)	79	5	0.72	+	6.95	0.000988	0.0083
cellular response to fluid shear stress (GO:0071498)	19	3	0.17	+	17.33	0.000983	0.00831
glandular epithelial cell development (GO:0002068)	19	3	0.17	+	17.33	0.000983	0.00831
response to amino acid starvation (GO:1990928)	79	5	0.72	+	6.95	0.000988	0.00831
cellular response to epidermal growth factor stimulus (GO:0071364)	45	4	0.41	+	9.75	0.000994	0.00834
regulation of carbohydrate metabolic process (GO:0006109)	217	8	1.98	+	4.05	0.00104	0.00871
regulation of cellular response to oxidative stress (GO:1900407)	80	5	0.73	+	6.86	0.00104	0.00872
peptidyl-threonine modification (GO:0018210)	80	5	0.73	+	6.86	0.00104	0.00873
cellular response to mechanical stimulus (GO:0071260)	80	5	0.73	+	6.86	0.00104	0.00873
negative regulation of mononuclear cell proliferation (GO:0032945)	80	5	0.73	+	6.86	0.00104	0.00874
determination of left/right symmetry (GO:0007368)	121	6	1.1	+	5.44	0.00105	0.00878
regulation of protein deacetylation (GO:0090311)	46	4	0.42	+	9.54	0.00107	0.00897
negative regulation of smooth muscle cell proliferation (GO:0048662)	46	4	0.42	+	9.54	0.00107	0.00897
regulation of ATP metabolic process (GO:1903578)	122	6	1.11	+	5.4	0.00109	0.00913
establishment of cell polarity (GO:0030010)	122	6	1.11	+	5.4	0.00109	0.00913
T-helper 1 type immune response (GO:0042088)	20	3	0.18	+	16.46	0.00112	0.00934
eosinophil migration (GO:0072677)	20	3	0.18	+	16.46	0.00112	0.00934
vascular process in circulatory system (GO:0003018)	169	7	1.54	+	4.55	0.00112	0.00934
positive regulation of cellular response to oxidative stress (GO:1900409)	20	3	0.18	+	16.46	0.00112	0.00935
regulation of production of miRNAs involved in gene silencing by miRNA (GO:1903798)	20	3	0.18	+	16.46	0.00112	0.00935
membrane protein ectodomain proteolysis (GO:0006509)	20	3	0.18	+	16.46	0.00112	0.00936
regulation of phospholipid biosynthetic process (GO:0071071)	20	3	0.18	+	16.46	0.00112	0.00936
regulation of monocyte differentiation (GO:0045655)	20	3	0.18	+	16.46	0.00112	0.00937
negative regulation of cellular senescence (GO:2000773)	20	3	0.18	+	16.46	0.00112	0.00937
trachea development (GO:0060438)	20	3	0.18	+	16.46	0.00112	0.00938
negative regulation of epidermal growth factor receptor signaling pathway (GO:0042059)	47	4	0.43	+	9.34	0.00116	0.00958
somite development (GO:0061053)	82	5	0.75	+	6.69	0.00116	0.00958
regulation of interleukin-1 beta secretion (GO:0050706)	47	4	0.43	+	9.34	0.00116	0.00959
regulation of mitochondrial outer membrane permeabilization involved in apoptotic signaling pathway (GO:1901028)	47	4	0.43	+	9.34	0.00116	0.00959
lymphocyte proliferation (GO:0046651)	82	5	0.75	+	6.69	0.00116	0.00959
hindbrain morphogenesis (GO:0021575)	47	4	0.43	+	9.34	0.00116	0.0096
mitochondrial transport (GO:0006839)	221	8	2.01	+	3.97	0.00116	0.00961
vein smooth muscle contraction (GO:0014826)	4	2	0.04	+	54.87	0.00119	0.00968
complement-mediated synapse pruning (GO:0150062)	4	2	0.04	+	54.87	0.00119	0.00969
mammary duct terminal end bud growth (GO:0060763)	4	2	0.04	+	54.87	0.00119	0.00969
sequestering of triglyceride (GO:0030730)	4	2	0.04	+	54.87	0.00119	0.0097
regulation of matrix metallopeptidase secretion (GO:1904464)	4	2	0.04	+	54.87	0.00119	0.0097
positive regulation of CD8-positive, alpha-beta T cell differentiation (GO:0043378)	4	2	0.04	+	54.87	0.00119	0.00971
T-helper 1 cell activation (GO:0035711)	4	2	0.04	+	54.87	0.00119	0.00971
regulation of mitotic cell cycle, embryonic (GO:0009794)	4	2	0.04	+	54.87	0.00119	0.00972
telomerase holoenzyme complex assembly (GO:1905323)	4	2	0.04	+	54.87	0.00119	0.00972
regulation of artery morphogenesis (GO:1905651)	4	2	0.04	+	54.87	0.00119	0.00973
sequestering of zinc ion (GO:0032119)	4	2	0.04	+	54.87	0.00119	0.00973
regulation of inflammatory response to wounding (GO:0106014)	4	2	0.04	+	54.87	0.00119	0.00974
positive regulation of artery morphogenesis (GO:1905653)	4	2	0.04	+	54.87	0.00119	0.00974
positive regulation of amyloid fibril formation (GO:1905908)	4	2	0.04	+	54.87	0.00119	0.00975
detection of lipopolysaccharide (GO:0032497)	4	2	0.04	+	54.87	0.00119	0.00975
microglia development (GO:0014005)	4	2	0.04	+	54.87	0.00119	0.00976
microglia differentiation (GO:0014004)	4	2	0.04	+	54.87	0.00119	0.00976
osteoclast proliferation (GO:0002158)	4	2	0.04	+	54.87	0.00119	0.00977
apoptotic process involved in blood vessel morphogenesis (GO:1902262)	4	2	0.04	+	54.87	0.00119	0.00977
positive regulation of smooth muscle cell chemotaxis (GO:0071673)	4	2	0.04	+	54.87	0.00119	0.00978
macrophage colony-stimulating factor signaling pathway (GO:0038145)	4	2	0.04	+	54.87	0.00119	0.00978
positive regulation of cell adhesion molecule production (GO:0060355)	4	2	0.04	+	54.87	0.00119	0.00979
regulation of hippocampal neuron apoptotic process (GO:0110089)	4	2	0.04	+	54.87	0.00119	0.00979
positive regulation of proteolysis involved in cellular protein catabolic process (GO:1903052)	124	6	1.13	+	5.31	0.00118	0.00979
organelle localization (GO:0051640)	588	14	5.36	+	2.61	0.00118	0.00979
negative regulation of T-helper 2 cell differentiation (GO:0045629)	4	2	0.04	+	54.87	0.00119	0.0098
negative regulation of inner ear auditory receptor cell differentiation (GO:0045608)	4	2	0.04	+	54.87	0.00119	0.0098
positive regulation of toll-like receptor 9 signaling pathway (GO:0034165)	4	2	0.04	+	54.87	0.00119	0.00981
negative regulation of mechanoreceptor differentiation (GO:0045632)	4	2	0.04	+	54.87	0.00119	0.00981
positive regulation of chronic inflammatory response (GO:0002678)	4	2	0.04	+	54.87	0.00119	0.00982
negative regulation of inner ear receptor cell differentiation (GO:2000981)	4	2	0.04	+	54.87	0.00119	0.00982
renal tubule development (GO:0061326)	83	5	0.76	+	6.61	0.00122	0.0099
mononuclear cell proliferation (GO:0032943)	83	5	0.76	+	6.61	0.00122	0.00991
positive regulation of mitotic cell cycle phase transition (GO:1901992)	83	5	0.76	+	6.61	0.00122	0.00991
positive regulation of biomineralization (GO:0110151)	48	4	0.44	+	9.15	0.00124	0.0101
eye photoreceptor cell differentiation (GO:0001754)	48	4	0.44	+	9.15	0.00124	0.0101
regulation of release of cytochrome c from mitochondria (GO:0090199)	48	4	0.44	+	9.15	0.00124	0.0101
positive regulation of biomineral tissue development (GO:0070169)	48	4	0.44	+	9.15	0.00124	0.0101
labyrinthine layer development (GO:0060711)	48	4	0.44	+	9.15	0.00124	0.0101
regulation of dendritic spine morphogenesis (GO:0061001)	48	4	0.44	+	9.15	0.00124	0.0101
positive regulation of cell adhesion mediated by integrin (GO:0033630)	21	3	0.19	+	15.68	0.00128	0.0103
positive regulation of stem cell differentiation (GO:2000738)	21	3	0.19	+	15.68	0.00128	0.0103
Sertoli cell differentiation (GO:0060008)	21	3	0.19	+	15.68	0.00128	0.0103
response to hydroperoxide (GO:0033194)	21	3	0.19	+	15.68	0.00128	0.0103
regulation of production of small RNA involved in gene silencing by RNA (GO:0070920)	21	3	0.19	+	15.68	0.00128	0.0103
negative regulation of chemokine production (GO:0032682)	21	3	0.19	+	15.68	0.00128	0.0103
negative regulation of cardiocyte differentiation (GO:1905208)	21	3	0.19	+	15.68	0.00128	0.0103
positive regulation of protein export from nucleus (GO:0046827)	21	3	0.19	+	15.68	0.00128	0.0103
megakaryocyte differentiation (GO:0030219)	21	3	0.19	+	15.68	0.00128	0.0103
positive regulation of cellular extravasation (GO:0002693)	21	3	0.19	+	15.68	0.00128	0.0103
maintenance of location (GO:0051235)	173	7	1.58	+	4.44	0.00127	0.0103
regulation of symbiosis, encompassing mutualism through parasitism (GO:0043903)	225	8	2.05	+	3.9	0.0013	0.0104
mitotic cell cycle phase transition (GO:0044772)	280	9	2.55	+	3.53	0.0013	0.0104
second-messenger-mediated signaling (GO:0019932)	338	10	3.08	+	3.25	0.00129	0.0104
receptor clustering (GO:0043113)	49	4	0.45	+	8.96	0.00134	0.0107
visual learning (GO:0008542)	49	4	0.45	+	8.96	0.00134	0.0107
neuron recognition (GO:0008038)	49	4	0.45	+	8.96	0.00134	0.0107
determination of bilateral symmetry (GO:0009855)	127	6	1.16	+	5.18	0.00133	0.0107
negative regulation of multi-organism process (GO:0043901)	226	8	2.06	+	3.88	0.00133	0.0107
localization within membrane (GO:0051668)	85	5	0.77	+	6.46	0.00135	0.0108
negative regulation of leukocyte proliferation (GO:0070664)	85	5	0.77	+	6.46	0.00135	0.0108
platelet degranulation (GO:0002576)	128	6	1.17	+	5.14	0.00138	0.0111
nephron development (GO:0072006)	128	6	1.17	+	5.14	0.00138	0.0111
specification of symmetry (GO:0009799)	128	6	1.17	+	5.14	0.00138	0.0111
axis specification (GO:0009798)	86	5	0.78	+	6.38	0.00141	0.0113
branching involved in mammary gland duct morphogenesis (GO:0060444)	22	3	0.2	+	14.96	0.00144	0.0115
myeloid dendritic cell activation (GO:0001773)	22	3	0.2	+	14.96	0.00144	0.0115
positive regulation of calcium ion import (GO:0090280)	22	3	0.2	+	14.96	0.00144	0.0115
protein insertion into mitochondrial membrane (GO:0051204)	22	3	0.2	+	14.96	0.00144	0.0115
dendritic cell migration (GO:0036336)	22	3	0.2	+	14.96	0.00144	0.0115
detection of biotic stimulus (GO:0009595)	22	3	0.2	+	14.96	0.00144	0.0115
positive regulation of nitric-oxide synthase activity (GO:0051000)	22	3	0.2	+	14.96	0.00144	0.0115
positive regulation of mitochondrial membrane permeability (GO:0035794)	22	3	0.2	+	14.96	0.00144	0.0115
left/right pattern formation (GO:0060972)	22	3	0.2	+	14.96	0.00144	0.0115
[truncated: 518 more rows]
