# Supplementary material for: Virus infection of the CNS disrupts the immune-neural-synaptic axis via induction of pleiotropic gene regulation of host responses
Source: eLife. 2021 Feb 18;10:e62273. doi: 10.7554/eLife.62273 (PMC7891934; doi:10.7554/eLife.62273)
Supplement: Supplementary file 7. [file elife-62273-supp7.xlsx]

## Sheet: SpC_9dpi
36 common elements in "SpC_179-Immune-Neural-Pleiotropic-genes" and "SpC_383-Synaptic genes":	19 common elements in "SpC_179-Immune-Neural-Pleiotropic-genes" and "SpC-9_Synaptic-UP":	17 common elements in "SpC_179-Immune-Neural-Pleiotropic-genes" and "SpC-9_Synaptic-DOWN":
ADAM10	ANXA1	HCLS1
ANXA1	ARF1	BCR
APP	C1QA	PSEN1
ARF1	DNM2	FZD3
BCR	EFNB1	APP
C1QA	FCGR2B	LRRC7
CYFIP2	FLNA	DOCK10
DNM2	ITGA3	PTK2
DOCK10	LYN	CYFIP2
EFNB1	MAPK1	RTN4
FCGR2B	NCSTN	PURA
FGFR2	P2RX4	ADAM10
FLNA	PAFAH1B1	PTPRZ1
FZD3	PAK2	SNAP25
HCLS1	PTK2B	NEDD4
ITGA3	RAB35	PTN
LRRC7	RELA	FGFR2
LYN	STAT3
MAPK1	ZBP1
NCSTN
NEDD4
P2RX4
PAFAH1B1
PAK2
PSEN1
PTK2
PTK2B
PTN
PTPRZ1
PURA
RAB35
RELA
RTN4
SNAP25
STAT3
ZBP1
