# Supplementary material for: Virus infection of the CNS disrupts the immune-neural-synaptic axis via induction of pleiotropic gene regulation of host responses
Source: eLife. 2021 Feb 18;10:e62273. doi: 10.7554/eLife.62273 (PMC7891934; doi:10.7554/eLife.62273)
Supplement: Supplementary file 9. [file elife-62273-supp9.xlsx]

## Sheet: Pleiotropic-synaptic_UP
GO term ID	GO domain	GO term name - hierarchical structure	GSEA p-value	GSEA 'gene cluster' FDR corrected p-value	genes - input - 19 pleiotropic-synaptic-UP-regulated
GO:0045202	CC	synapse	1.61121e-14	8.05607e-14	RELA;ANXA1;PTK2B;ITGA3;RAB35;EFNB1;NCSTN;FLNA;LYN;PAK2;STAT3;MAPK1;ARF1;DNM2
GO:0097060	CC	├─ synaptic membrane			ANXA1
GO:0098793	CC	├─ presynapse	0.000113296	0.000113296	PTK2B;ITGA3;RAB35;EFNB1;NCSTN
GO:0048786	CC	│ ├─ presynaptic active zone			ITGA3
GO:0048787	CC	│ │ └─ presynaptic active zone membrane			ITGA3
GO:0099059	CC	│ │ └─ integral component of presynaptic active zone membrane			ITGA3
GO:0008021	CC	│ ├─ synaptic vesicle			RAB35
GO:0030672	CC	│ │ └─ synaptic vesicle membrane			RAB35
GO:0098993	CC	│ │ ├─ anchored component of synaptic vesicle membrane			RAB35
GO:0042734	CC	│ ├─ presynaptic membrane			EFNB1;NCSTN
GO:0099056	CC	│ │ └─ integral component of presynaptic membrane			EFNB1;NCSTN
GO:0098794	CC	├─ postsynapse	3.10439e-09	7.76097e-09	FLNA;PTK2B;LYN;PAK2;STAT3;MAPK1;ARF1;DNM2;ITGA3
GO:0099572	CC	│ ├─ postsynaptic specialization	1.624e-08	2.70667e-08	LYN;PAK2;STAT3;MAPK1;ARF1;DNM2;PTK2B
GO:0099091	CC	│ │ ├─ postsynaptic specialization, intracellular component			LYN
GO:0014069	CC	│ │ ├─ postsynaptic density	1.51281e-07	1.89101e-07	PAK2;STAT3;MAPK1;ARF1;DNM2;PTK2B
GO:0099092	CC	│ │ │ ├─ postsynaptic density, intracellular component			DNM2;PTK2B
GO:0045211	CC	│ ├─ postsynaptic membrane			ITGA3
GO:0099055	CC	│ │ └─ integral component of postsynaptic membrane			ITGA3
SYNGO:synprocess	BP	process in the synapse	1.75176e-09	5.25528e-09	RAB35;DNM2;PAK2;STAT3;PAFAH1B1;PTK2B;FLNA;ITGA3;EFNB1;ARF1
SYNGO:presynprocess	BP	├─ process in the presynapse			RAB35;DNM2
GO:0099504	BP	│ ├─ synaptic vesicle cycle			RAB35;DNM2
GO:0099532	BP	│ │ ├─ synaptic vesicle endosomal processing			RAB35
GO:0048488	BP	│ │ └─ synaptic vesicle endocytosis			DNM2
SYNGO:postsynprocess	BP	├─ process in the postsynapse			PAK2
GO:0099072	BP	│ ├─ regulation of postsynaptic membrane neurotransmitter receptor levels			PAK2
GO:0099645	BP	│ │ ├─ neurotransmitter receptor localization to postsynaptic specialization membrane			PAK2
GO:0098696	BP	│ │ │ └─ regulation of neurotransmitter receptor localization to postsynaptic specialization membrane			PAK2
GO:0099536	BP	├─ synaptic signaling	0.000711365		STAT3;PAFAH1B1;PTK2B
GO:0099537	BP	│ ├─ trans-synaptic signaling	0.00068732		STAT3;PAFAH1B1;PTK2B
GO:0007268	BP	│ │ └─ chemical synaptic transmission	0.000429623	0.000429623	STAT3;PAFAH1B1;PTK2B
GO:0050804	BP	│ │ ├─ modulation of chemical synaptic transmission			STAT3;PAFAH1B1
GO:0099565	BP	│ │ └─ postsynaptic process involved in chemical synaptic transmission			PTK2B
GO:0099170	BP	│ │ └─ postsynaptic modulation of chemical synaptic transmission			PTK2B
GO:0050808	BP	├─ synapse organization	1.0706e-08	1.6059e-08	FLNA;ITGA3;PAFAH1B1;EFNB1;PTK2B;PAK2;ARF1
GO:0099173	BP	│ ├─ postsynapse organization			ITGA3;PAFAH1B1
GO:0099175	BP	│ │ ├─ regulation of postsynapse organization			PAFAH1B1
GO:0099560	BP	│ ├─ synapse adhesion between pre- and post-synapse			ITGA3
GO:0007416	BP	│ ├─ synapse assembly			EFNB1;PTK2B
GO:0099054	BP	│ │ ├─ presynapse assembly			EFNB1
GO:0098698	BP	│ │ ├─ postsynaptic specialization assembly			PTK2B
GO:0097107	BP	│ │ │ └─ postsynaptic density assembly			PTK2B
GO:0099151	BP	│ │ │ └─ regulation of postsynaptic density assembly			PTK2B
GO:0060074	BP	│ ├─ synapse maturation			PAK2
GO:0090128	BP	│ │ └─ regulation of synapse maturation			PAK2
GO:0099188	BP	│ └─ postsynaptic cytoskeleton organization			ARF1
GO:0098974	BP	│ ├─ postsynaptic actin cytoskeleton organization			ARF1
Blank p-values: less than 3 genes - not sifnificant

## Sheet: Pleiotropic-synaptic_DOWN
GO term ID	GO domain	GO term name - hierarchical structure	GSEA p-value	GSEA 'gene cluster' FDR corrected p-value	genes - input - 17 pleiotropic-synaptic-DOWN-regulated
GO:0045202	CC	synapse	1.04562e-15	5.22809e-15	CYFIP2;PTPRZ1;PTN;APP;SNAP25;PSEN1;ADAM10;PURA;PTK2;DOCK10;NEDD4;BCR;RTN4;LRRC7
GO:0098793	CC	├─ presynapse	0.000898986	0.000898986	PTN;APP;SNAP25;PSEN1
GO:0048786	CC	│ ├─ presynaptic active zone			APP
GO:0042734	CC	│ ├─ presynaptic membrane			SNAP25;PSEN1
GO:0099026	CC	│ │ ├─ anchored component of presynaptic membrane			SNAP25
GO:0098888	CC	│ │ ├─ extrinsic component of presynaptic membrane			SNAP25
GO:0099056	CC	│ │ └─ integral component of presynaptic membrane			PSEN1
GO:0098794	CC	├─ postsynapse	5.15945e-13	1.28986e-12	ADAM10;PURA;PTN;PTK2;DOCK10;NEDD4;BCR;RTN4;LRRC7;PTPRZ1;PSEN1
GO:0099524	CC	│ ├─ postsynaptic cytosol			NEDD4
GO:0099572	CC	│ ├─ postsynaptic specialization	6.9791e-06		PURA;BCR;RTN4;LRRC7;PTPRZ1
GO:0014069	CC	│ │ ├─ postsynaptic density	2.54148e-06	4.23581e-06	PURA;BCR;RTN4;LRRC7;PTPRZ1
GO:0099092	CC	│ │ │ ├─ postsynaptic density, intracellular component			BCR
GO:0098839	CC	│ │ │ └─ postsynaptic density membrane	0.000119109		RTN4;LRRC7;PTPRZ1
GO:0099061	CC	│ │ │ └─ integral component of postsynaptic density membrane	6.53211e-05	8.16514e-05	RTN4;LRRC7;PTPRZ1
SYNGO:postsyn_er	CC	│ └─ postsynaptic ER			PSEN1
SYNGO:postsyn_ser	CC	│ └─ postsynaptic SER			PSEN1
SYNGO:synprocess	BP	process in the synapse	1.08886e-08	3.26657e-08	SNAP25;ADAM10;NEDD4;BCR;PTN;PSEN1;PTK2;APP;PURA
SYNGO:presynprocess	BP	├─ process in the presynapse			SNAP25
GO:0099504	BP	│ ├─ synaptic vesicle cycle			SNAP25
GO:0016079	BP	│ │ ├─ synaptic vesicle exocytosis			SNAP25
SYNGO:postsynprocess	BP	├─ process in the postsynapse			ADAM10;NEDD4
GO:0099072	BP	│ ├─ regulation of postsynaptic membrane neurotransmitter receptor levels			ADAM10;NEDD4
GO:0099645	BP	│ │ ├─ neurotransmitter receptor localization to postsynaptic specialization membrane			ADAM10
GO:0098696	BP	│ │ │ └─ regulation of neurotransmitter receptor localization to postsynaptic specialization membrane			ADAM10
GO:0098884	BP	│ │ └─ postsynaptic neurotransmitter receptor endocytosis			NEDD4
GO:0099149	BP	│ │ └─ regulation of postsynaptic neurotransmitter receptor endocytosis			NEDD4
GO:0099536	BP	├─ synaptic signaling			BCR;PTN
GO:0099537	BP	│ ├─ trans-synaptic signaling			BCR;PTN
GO:0007268	BP	│ │ └─ chemical synaptic transmission			BCR;PTN
GO:0050804	BP	│ │ ├─ modulation of chemical synaptic transmission			BCR;PTN
GO:0050808	BP	├─ synapse organization	0.000124775	0.000124775	ADAM10;PSEN1;PTK2;APP
GO:0099173	BP	│ ├─ postsynapse organization			ADAM10;PSEN1
GO:0099175	BP	│ │ ├─ regulation of postsynapse organization			ADAM10;PSEN1
GO:0099563	BP	│ ├─ modification of synaptic structure			PTK2
GO:0099010	BP	│ │ └─ modification of postsynaptic structure			PTK2
GO:0098885	BP	│ │ └─ modification of postsynaptic actin cytoskeleton			PTK2
GO:1905274	BP	│ │ └─ regulation of modification of postsynaptic actin cytoskeleton			PTK2
GO:0007416	BP	│ ├─ synapse assembly			APP
GO:0051963	BP	│ │ ├─ regulation of synapse assembly			APP
GO:1905606	BP	│ │ │ ├─ regulation of presynapse assembly			APP
SYNGO:metabolism	BP	├─ metabolism	9.38899e-05		NEDD4;ADAM10;PSEN1
GO:0099574	BP	│ ├─ regulation of protein catabolic process at synapse, modulating synaptic transmission			NEDD4
GO:0099576	BP	│ │ ├─ regulation of protein catabolic process at postsynapse, modulating synaptic transmission			NEDD4
SYNGO:catabolic_synapse	BP	│ ├─ protein catabolic process at synapse	3.85531e-07		ADAM10;PSEN1;NEDD4
SYNGO:catabolic_postsynapse	BP	│ │ └─ protein catabolic process at postsynapse	1.9724e-07	2.9586e-07	ADAM10;PSEN1;NEDD4
SYNGO:catabolic_postsynapse_regulation	BP	│ │ └─ regulation of protein catabolic process at postsynapse			NEDD4
SYNGO:transport	BP	└─ transport			PURA
GO:0008088	BP	├─ axo-dendritic transport			PURA
GO:0098935	BP	│ └─ dendritic transport			PURA
GO:0098961	BP	│ └─ dendritic transport of ribonucleoprotein complex			PURA
GO:0098963	BP	│ └─ dendritic transport of messenger ribonucleoprotein complex			PURA
Blank p-values: less than 3 genes - not sifnificant
